# Supplementary material for: Determination of the Amino Acid Recruitment Order in Early Life by Genome-Wide Analysis of Amino Acid Usage Bias
Source: MDPI journal article supplement (doi:10.3390/biom12020171), 2022-01-21
Supplement: s1 [file s1]

## **Supplementary Figures:**

### **Determination of the Amino Acid Recruitment Order in Early Life by Genome-wide Analysis of Amino Acid Usage Bias**

Ming-Xiao Zhao<sup>1</sup>, Ruo-Fan Ding<sup>2</sup>, Yan Liu<sup>1,\*</sup>, Zhi-Liang Ji<sup>2,\*</sup>, Yu-Fen Zhao<sup>1,3,\*</sup>

<sup>1</sup> Department of Chemical Biology, Key Laboratory for Chemical Biology of Fujian Province, College of Chemistry and Chemical Engineering, Xiamen University, Xiamen, Fujian, 361005, P. R. China

<sup>2</sup> State Key Laboratory of Cellular Stress Biology, School of Life Science, Xiamen University, Xiamen 361102, P. R. China

<sup>3</sup> Institute of Drug Discovery Technology, Ningbo University, Ningbo, Zhejiang, 315221, P. R. China

Supplementary file contains:

**Supplementary Figure 1**

**Supplementary Figure 2**

**Supplementary Figure 3**

**Supplementary Figure 4**

Supplementary Figure 1

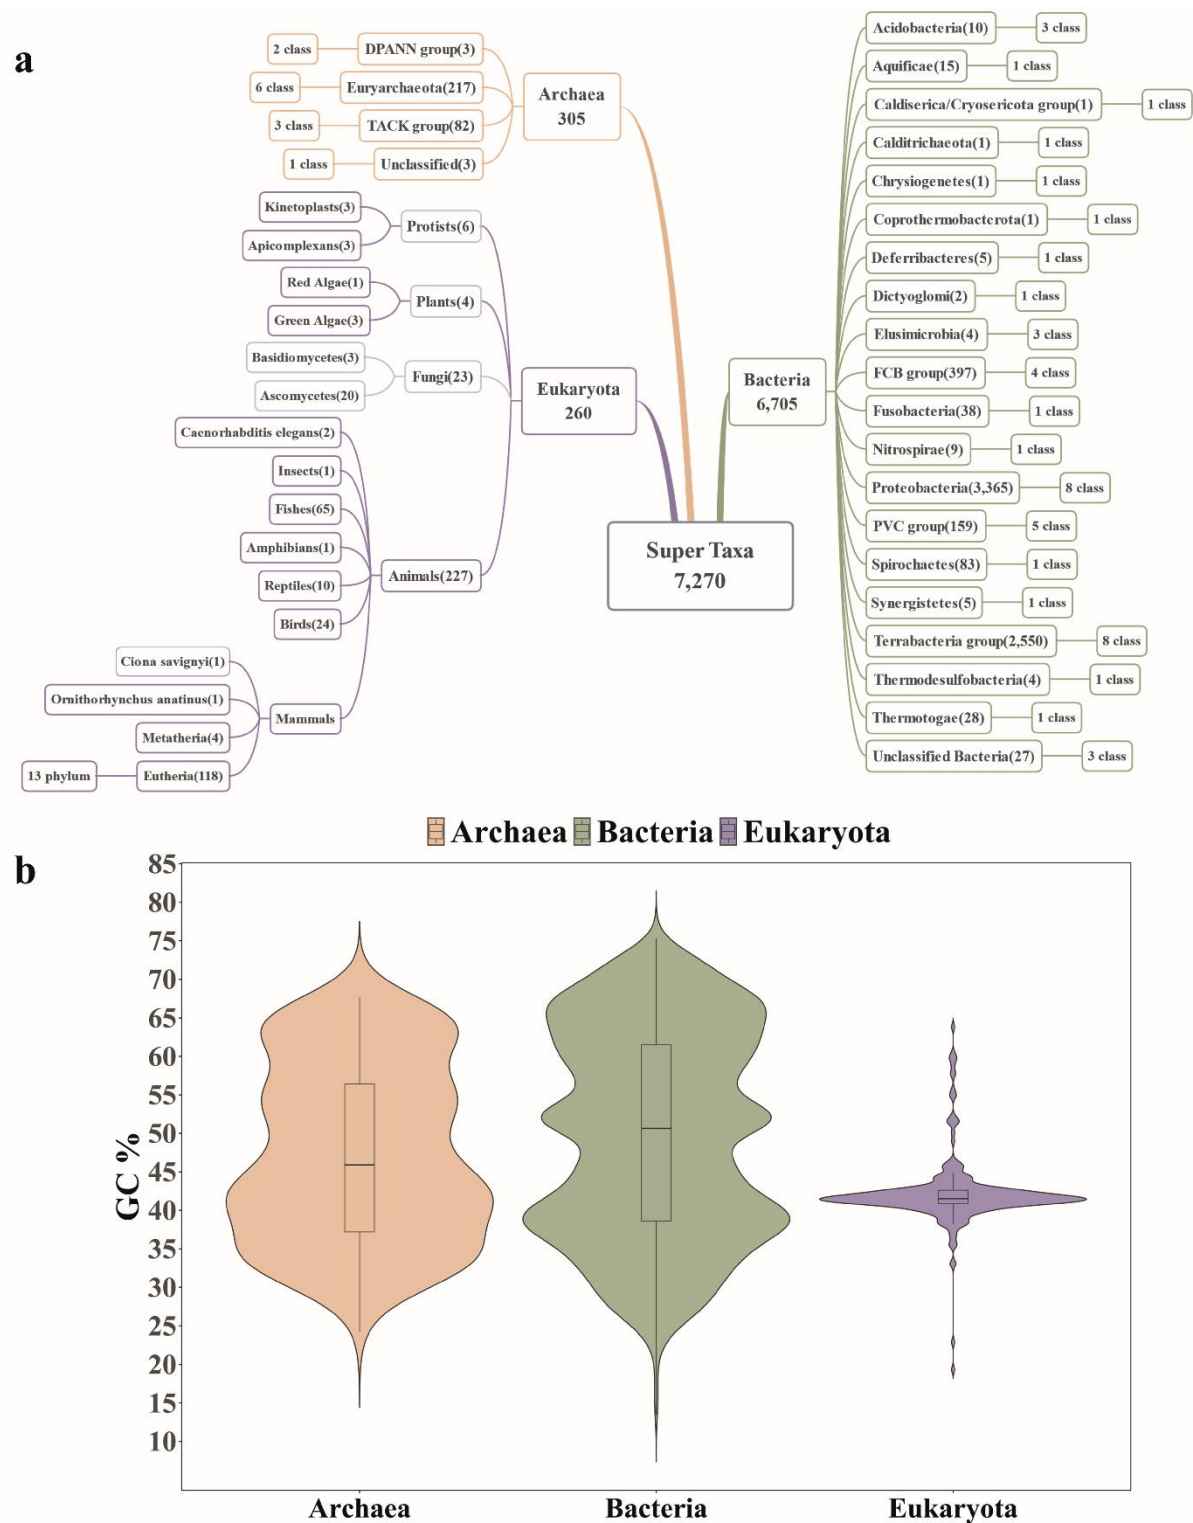

**Figure S1. Information on the species in this study. (a)** Spezies classification. The number indicates the number of species included in this category. **(b)** Genomic GC content distribution in three domains of life.

**Supplementary Figure 2**

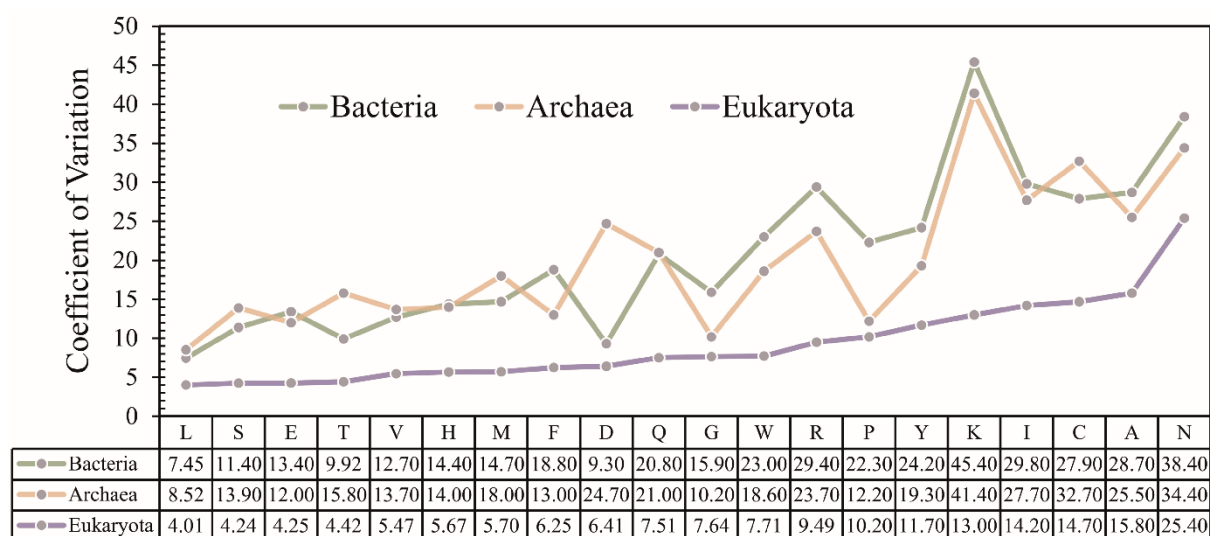

**Figure S2. Coefficient of variation of amino acid usage in three domains of life.** The coefficient of variation (CV) is a normalized measure of the dispersion degree of the probability distribution, which is defined as the ratio of the standard deviation (SD) to the average value.

# Supplementary Figure 3

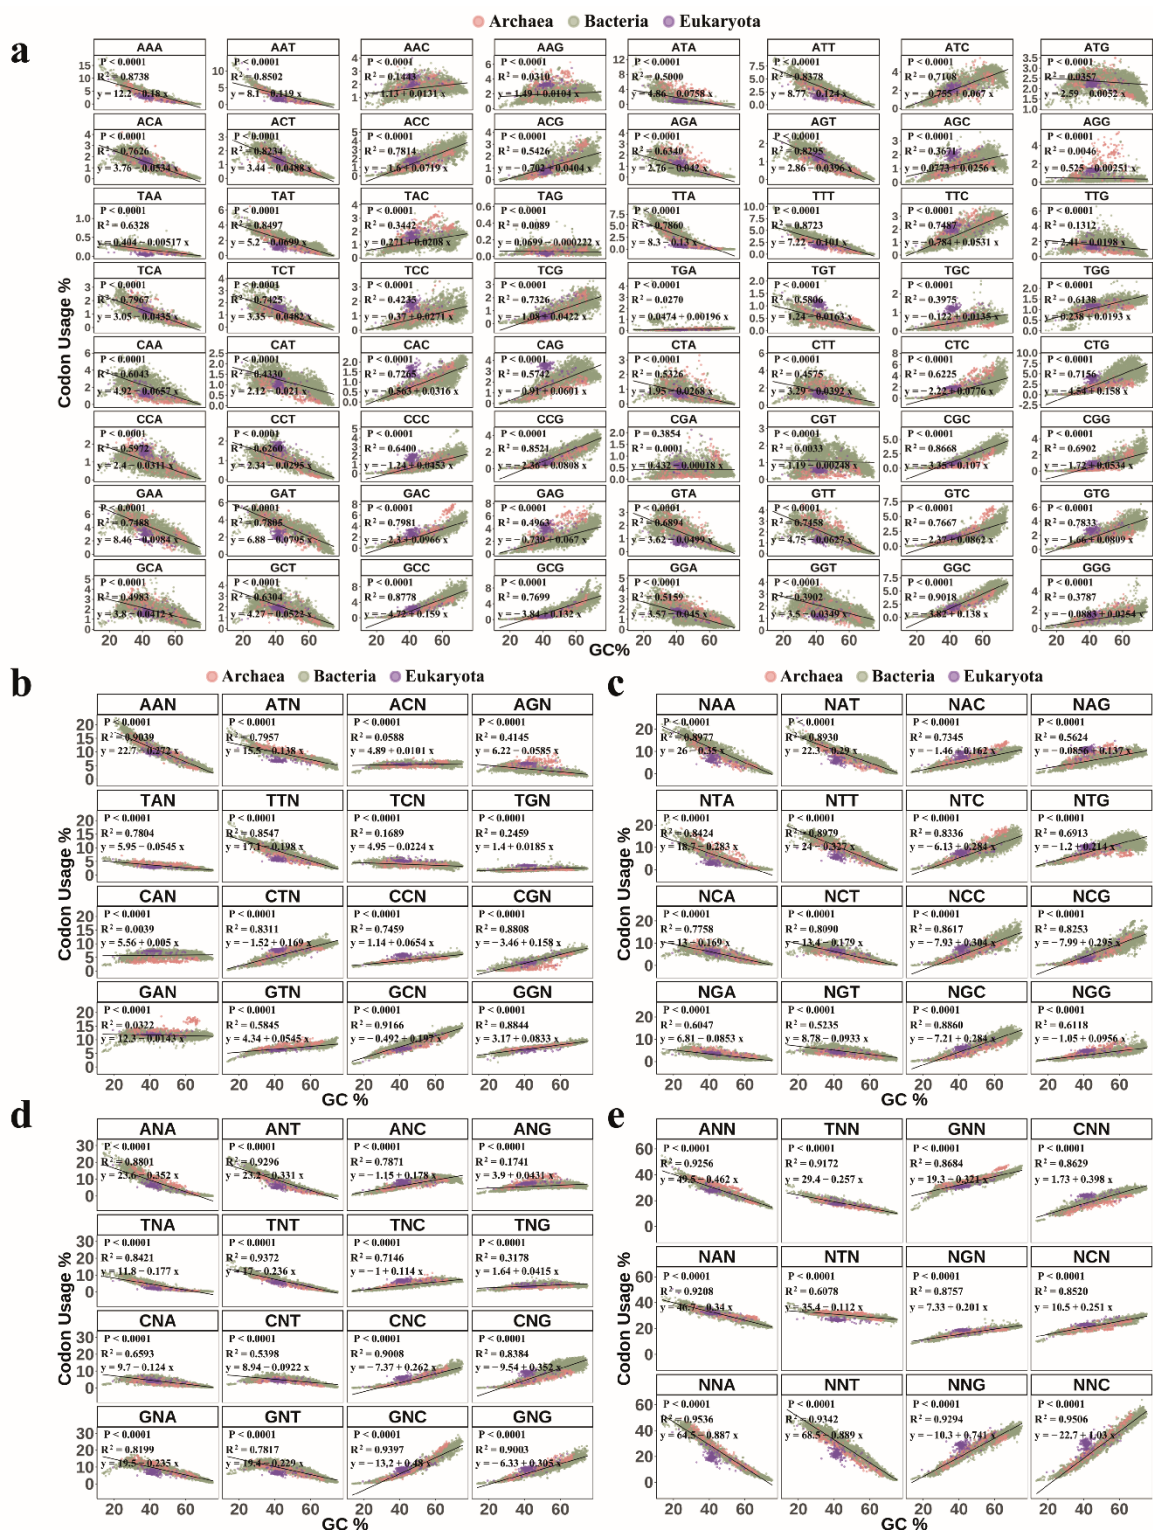

**Figure S3. Correlation between the species' GC content and codon usage.** (a) 64 codons; (b) codons with the same first two bases; (c) codons with the same last two bases; (d) codons with the same first and third bases; (e) codons with the same one base. The abscissa represents GC content, and the ordinate represents the codon usage (%).

**Supplementary Figure 4**

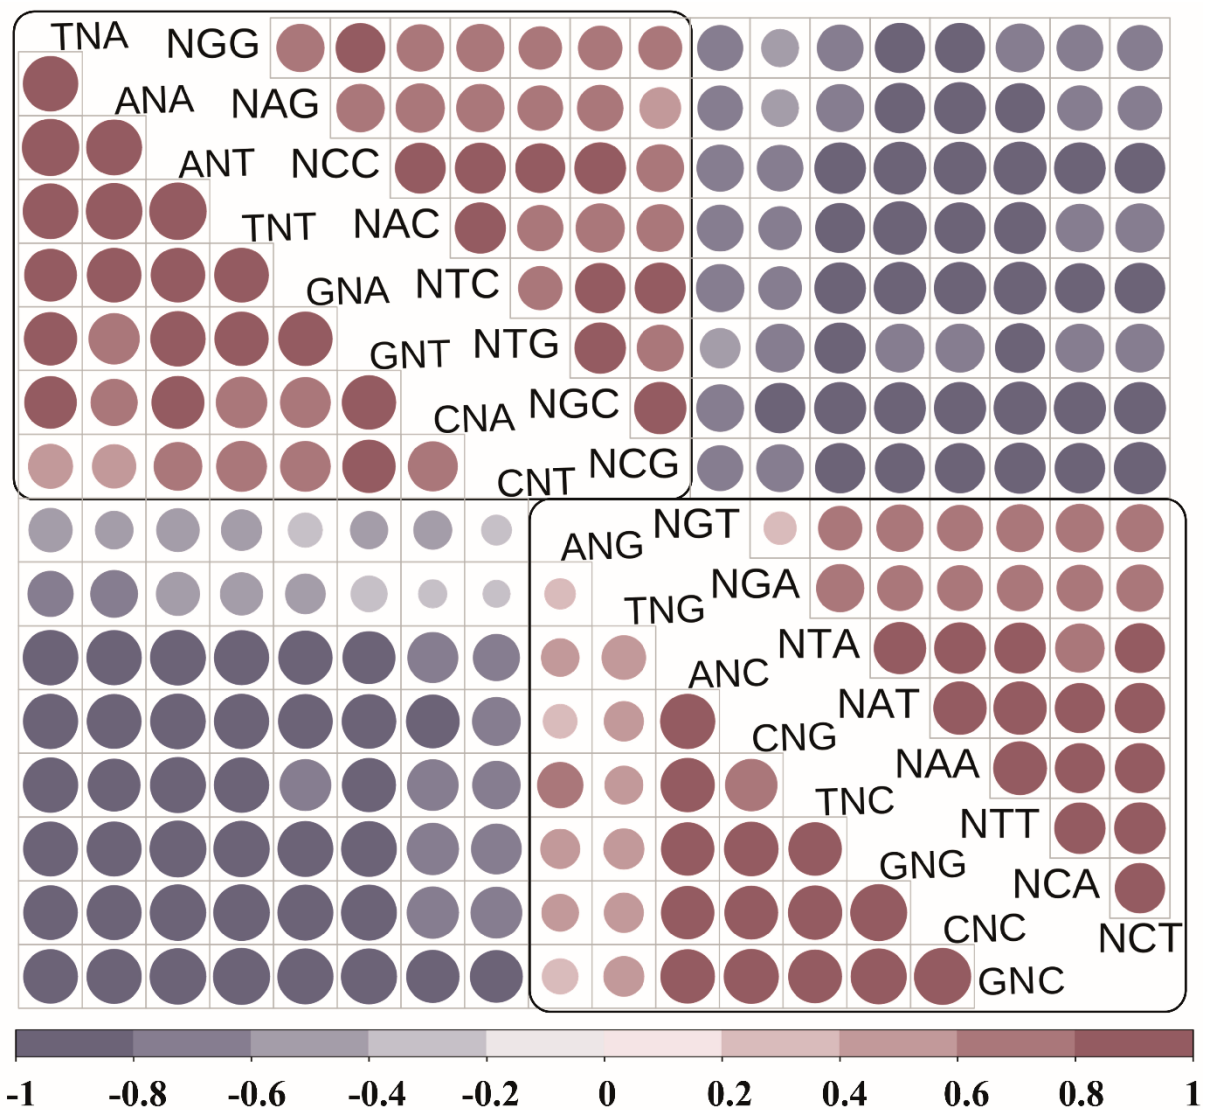

**Figure S4.** Correlation of codon usage with the same last two bases (lower) and the same first and third bases (upper).
