# Supplementary material for: Determination of the Amino Acid Recruitment Order in Early Life by Genome-Wide Analysis of Amino Acid Usage Bias
Source: Biomolecules. 2022 Jan 21;12(2):171. doi: 10.3390/biom12020171 (PMC8961565; doi:10.3390/biom12020171)
Supplement: Supplementary file 1 [file biomolecules-12-00171-s001.zip › Supplementary Tables 1-7.xlsx]

## Sheet: Sheet1
Supplementary Table 1 Basic information of the species.
Supplementary Table 2 AAindex.
Supplementary Table 3 Codon usage of the species.
Supplementary Table 4 Amino acid usage of the species.
Supplementary Table 5 Abbreviated list of research the species.
Supplementary Table 6 Model organisms.
Supplementary Table 7 Pseudotime analysis results.

## Sheet: Table S1
#Organism/Name	TaxID	Group	SubGroup	GC%	Status	FTP Path
Leishmania major strain Friedlin	347515	Protists	Kinetoplasts	59.7114	Complete Genome	ftp://ftp.ncbi.nlm.nih.gov/genomes/all/GCA/000/002/725/GCA_000002725.2_ASM272v2/GCA_000002725.2_ASM272v2_feature_table.txt.gz
Leishmania donovani	5661	Protists	Kinetoplasts	59.7642	Complete Genome	ftp://ftp.ncbi.nlm.nih.gov/genomes/all/GCA/003/719/575/GCA_003719575.1_ASM371957v1/GCA_003719575.1_ASM371957v1_feature_table.txt.gz
Leishmania braziliensis MHOM/BR/75/M2904	420245	Protists	Kinetoplasts	58.042	Complete Genome	ftp://ftp.ncbi.nlm.nih.gov/genomes/all/GCA/900/537/975/GCA_900537975.1_LBRM_genome_annotation/GCA_900537975.1_LBRM_genome_annotation_feature_table.txt.gz
Plasmodium falciparum 3D7	36329	Protists	Apicomplexans	19.3315	Complete Genome	ftp://ftp.ncbi.nlm.nih.gov/genomes/all/GCA/000/002/765/GCA_000002765.2_ASM276v2/GCA_000002765.2_ASM276v2_feature_table.txt.gz
Theileria orientalis strain Shintoku	869250	Protists	Apicomplexans	41.5803	Complete Genome	ftp://ftp.ncbi.nlm.nih.gov/genomes/all/GCA/000/740/895/GCA_000740895.1_ASM74089v1/GCA_000740895.1_ASM74089v1_feature_table.txt.gz
Plasmodium vinckei vinckei	54757	Protists	Apicomplexans	22.8906	Complete Genome	ftp://ftp.ncbi.nlm.nih.gov/genomes/all/GCA/900/681/995/GCA_900681995.1_PVVCY_v1/GCA_900681995.1_PVVCY_v1_feature_table.txt.gz
Cyanidioschyzon merolae strain 10D	280699	Plants	Red Algae	55.0171	Complete Genome	ftp://ftp.ncbi.nlm.nih.gov/genomes/all/GCA/000/091/205/GCA_000091205.1_ASM9120v1/GCA_000091205.1_ASM9120v1_feature_table.txt.gz
Micromonas commoda	296587	Plants	Green Algae	63.8223	Complete Genome	ftp://ftp.ncbi.nlm.nih.gov/genomes/all/GCA/000/090/985/GCA_000090985.2_ASM9098v2/GCA_000090985.2_ASM9098v2_feature_table.txt.gz
Ostreococcus lucimarinus CCE9901	436017	Plants	Green Algae	60.4431	Complete Genome	ftp://ftp.ncbi.nlm.nih.gov/genomes/all/GCA/000/092/065/GCA_000092065.1_ASM9206v1/GCA_000092065.1_ASM9206v1_feature_table.txt.gz
Chloropicon primus	1764295	Plants	Green Algae	57.511	Complete Genome	ftp://ftp.ncbi.nlm.nih.gov/genomes/all/GCA/007/859/695/GCA_007859695.1_ASM785969v1/GCA_007859695.1_ASM785969v1_feature_table.txt.gz
Malassezia restricta	76775	Fungi	Basidiomycetes	55.6659	Complete Genome	ftp://ftp.ncbi.nlm.nih.gov/genomes/all/GCA/003/290/485/GCA_003290485.1_ASM329048v1/GCA_003290485.1_ASM329048v1_feature_table.txt.gz
Ustilago bromivora	307758	Fungi	Basidiomycetes	52.2675	Complete Genome	ftp://ftp.ncbi.nlm.nih.gov/genomes/all/GCA/900/080/155/GCA_900080155.1_UBRO_v3/GCA_900080155.1_UBRO_v3_feature_table.txt.gz
Malassezia sympodialis ATCC 42132	1230383	Fungi	Basidiomycetes	58.9133	Complete Genome	ftp://ftp.ncbi.nlm.nih.gov/genomes/all/GCA/900/149/145/GCA_900149145.1_Msy_ATCC_42132_Feb2016/GCA_900149145.1_Msy_ATCC_42132_Feb2016_feature_table.txt.gz
Kluyveromyces lactis	28985	Fungi	Ascomycetes	38.7053	Complete Genome	ftp://ftp.ncbi.nlm.nih.gov/genomes/all/GCA/000/002/515/GCA_000002515.1_ASM251v1/GCA_000002515.1_ASM251v1_feature_table.txt.gz
Candida dubliniensis CD36	573826	Fungi	Ascomycetes	33.2489	Complete Genome	ftp://ftp.ncbi.nlm.nih.gov/genomes/all/GCA/000/026/945/GCA_000026945.1_ASM2694v1/GCA_000026945.1_ASM2694v1_feature_table.txt.gz
Eremothecium gossypii ATCC 10895	284811	Fungi	Ascomycetes	51.6989	Complete Genome	ftp://ftp.ncbi.nlm.nih.gov/genomes/all/GCA/000/091/025/GCA_000091025.4_ASM9102v4/GCA_000091025.4_ASM9102v4_feature_table.txt.gz
Botrytis cinerea B05.10	332648	Fungi	Ascomycetes	42.0028	Complete Genome	ftp://ftp.ncbi.nlm.nih.gov/genomes/all/GCA/000/143/535/GCA_000143535.4_ASM14353v4/GCA_000143535.4_ASM14353v4_feature_table.txt.gz
Thermothelomyces thermophilus ATCC 42464	573729	Fungi	Ascomycetes	51.4491	Complete Genome	ftp://ftp.ncbi.nlm.nih.gov/genomes/all/GCA/000/226/095/GCA_000226095.1_ASM22609v1/GCA_000226095.1_ASM22609v1_feature_table.txt.gz
Thermothielavioides terrestris NRRL 8126	578455	Fungi	Ascomycetes	54.7294	Complete Genome	ftp://ftp.ncbi.nlm.nih.gov/genomes/all/GCA/000/226/115/GCA_000226115.1_ASM22611v1/GCA_000226115.1_ASM22611v1_feature_table.txt.gz
Saccharomycetaceae sp. 'Ashbya aceri'	566037	Fungi	Ascomycetes	51.1789	Complete Genome	ftp://ftp.ncbi.nlm.nih.gov/genomes/all/GCA/000/412/225/GCA_000412225.2_ASM41222v2/GCA_000412225.2_ASM41222v2_feature_table.txt.gz
Eremothecium gossypii FDAG1	1034331	Fungi	Ascomycetes	51.678	Complete Genome	ftp://ftp.ncbi.nlm.nih.gov/genomes/all/GCA/000/968/835/GCA_000968835.1_ASM96883v1/GCA_000968835.1_ASM96883v1_feature_table.txt.gz
Kluyveromyces marxianus DMKU3-1042	1003335	Fungi	Ascomycetes	40.1173	Complete Genome	ftp://ftp.ncbi.nlm.nih.gov/genomes/all/GCA/001/417/885/GCA_001417885.1_Kmar_1.0/GCA_001417885.1_Kmar_1.0_feature_table.txt.gz
Sugiyamaella lignohabitans	796027	Fungi	Ascomycetes	44.877	Complete Genome	ftp://ftp.ncbi.nlm.nih.gov/genomes/all/GCA/001/640/025/GCA_001640025.2_ASM164002v2/GCA_001640025.2_ASM164002v2_feature_table.txt.gz
Yarrowia lipolytica	4952	Fungi	Ascomycetes	48.9838	Complete Genome	ftp://ftp.ncbi.nlm.nih.gov/genomes/all/GCA/001/761/485/GCA_001761485.1_ASM176148v1/GCA_001761485.1_ASM176148v1_feature_table.txt.gz
Zygosaccharomyces parabailii	1365886	Fungi	Ascomycetes	42.4701	Complete Genome	ftp://ftp.ncbi.nlm.nih.gov/genomes/all/GCA/001/984/395/GCA_001984395.2_ASM198439v2/GCA_001984395.2_ASM198439v2_feature_table.txt.gz
[Candida] auris	498019	Fungi	Ascomycetes	45.351	Complete Genome	ftp://ftp.ncbi.nlm.nih.gov/genomes/all/GCA/003/013/715/GCA_003013715.1_Cand_auris_B11220/GCA_003013715.1_Cand_auris_B11220_feature_table.txt.gz
Pichia kudriavzevii	4909	Fungi	Ascomycetes	38.249	Complete Genome	ftp://ftp.ncbi.nlm.nih.gov/genomes/all/GCA/003/054/445/GCA_003054445.1_ASM305444v1/GCA_003054445.1_ASM305444v1_feature_table.txt.gz
Metschnikowia aff. pulcherrima	2163413	Fungi	Ascomycetes	45.8881	Complete Genome	ftp://ftp.ncbi.nlm.nih.gov/genomes/all/GCA/004/217/705/GCA_004217705.1_ASM421770v1/GCA_004217705.1_ASM421770v1_feature_table.txt.gz
Pyricularia oryzae	318829	Fungi	Ascomycetes	50.0762	Complete Genome	ftp://ftp.ncbi.nlm.nih.gov/genomes/all/GCA/004/346/965/GCA_004346965.1_ASM434696v1/GCA_004346965.1_ASM434696v1_feature_table.txt.gz
Venturia effusa	50376	Fungi	Ascomycetes	45.973	Complete Genome	ftp://ftp.ncbi.nlm.nih.gov/genomes/all/GCA/007/735/645/GCA_007735645.1_ASM773564v1/GCA_007735645.1_ASM773564v1_feature_table.txt.gz
Komagataella phaffii CBS 7435	981350	Fungi	Ascomycetes	41.2074	Complete Genome	ftp://ftp.ncbi.nlm.nih.gov/genomes/all/GCA/900/235/035/GCA_900235035.1_ASM90023503v1/GCA_900235035.1_ASM90023503v1_feature_table.txt.gz
Saccharomyces cerevisiae S288C	559292	Fungi	Ascomycetes	38.1556	Complete Genome	ftp://ftp.ncbi.nlm.nih.gov/genomes/all/GCA/000/146/045/GCA_000146045.2_R64/GCA_000146045.2_R64_feature_table.txt.gz
Caenorhabditis elegans	6239	Animals	Roundworms	35.4317	Complete Genome	ftp://ftp.ncbi.nlm.nih.gov/genomes/all/GCA/000/002/985/GCA_000002985.3_WBcel235/GCA_000002985.3_WBcel235_feature_table.txt.gz
Candidatus Koribacter versatilis Ellin345	204669	Acidobacteria	Acidobacteriia	58.4	Complete Genome	ftp://ftp.ncbi.nlm.nih.gov/genomes/all/GCA/000/014/005/GCA_000014005.1_ASM1400v1
Candidatus Solibacter usitatus Ellin6076	234267	Acidobacteria	Acidobacteriia	61.9	Complete Genome	ftp://ftp.ncbi.nlm.nih.gov/genomes/all/GCA/000/014/905/GCA_000014905.1_ASM1490v1
Acidobacterium capsulatum ATCC 51196	240015	Acidobacteria	Acidobacteriia	60.5	Complete Genome	ftp://ftp.ncbi.nlm.nih.gov/genomes/all/GCA/000/022/565/GCA_000022565.1_ASM2256v1
Granulicella mallensis MP5ACTX8	682795	Acidobacteria	Acidobacteriia	57.9	Complete Genome	ftp://ftp.ncbi.nlm.nih.gov/genomes/all/GCA/000/178/955/GCA_000178955.2_ASM17895v2
Granulicella tundricola MP5ACTX9	1198114	Acidobacteria	Acidobacteriia	59.968	Complete Genome	ftp://ftp.ncbi.nlm.nih.gov/genomes/all/GCA/000/178/975/GCA_000178975.2_ASM17897v2
Terriglobus saanensis SP1PR4	401053	Acidobacteria	Acidobacteriia	57.3	Complete Genome	ftp://ftp.ncbi.nlm.nih.gov/genomes/all/GCA/000/179/915/GCA_000179915.2_ASM17991v2
Terriglobus roseus DSM 18391	926566	Acidobacteria	Acidobacteriia	60.3	Complete Genome	ftp://ftp.ncbi.nlm.nih.gov/genomes/all/GCA/000/265/425/GCA_000265425.1_ASM26542v1
Acidisarcina polymorpha	2211140	Acidobacteria	Acidobacteriia	56.8879	Complete Genome	ftp://ftp.ncbi.nlm.nih.gov/genomes/all/GCA/003/330/725/GCA_003330725.1_ASM333072v1
Chloracidobacterium thermophilum B	981222	Acidobacteria	Blastocatellia	61.3452	Complete Genome	ftp://ftp.ncbi.nlm.nih.gov/genomes/all/GCA/000/226/295/GCA_000226295.1_ASM22629v1
Luteitalea pratensis	1855912	Acidobacteria	Vicinamibacteria	67.2	Complete Genome	ftp://ftp.ncbi.nlm.nih.gov/genomes/all/GCA/001/618/865/GCA_001618865.1_ASM161886v1
Aquifex aeolicus VF5	224324	Aquificae	Aquificae	43.3239	Complete Genome	ftp://ftp.ncbi.nlm.nih.gov/genomes/all/GCA/000/008/625/GCA_000008625.1_ASM862v1
Hydrogenobacter thermophilus TK-6	608538	Aquificae	Aquificae	44	Complete Genome	ftp://ftp.ncbi.nlm.nih.gov/genomes/all/GCA/000/010/785/GCA_000010785.1_ASM1078v1
Sulfurihydrogenibium sp. YO3AOP1	436114	Aquificae	Aquificae	32	Complete Genome	ftp://ftp.ncbi.nlm.nih.gov/genomes/all/GCA/000/020/325/GCA_000020325.1_ASM2032v1
Hydrogenobaculum sp. Y04AAS1	380749	Aquificae	Aquificae	34.8	Complete Genome	ftp://ftp.ncbi.nlm.nih.gov/genomes/all/GCA/000/020/785/GCA_000020785.1_ASM2078v1
Sulfurihydrogenibium azorense Az-Fu1	204536	Aquificae	Aquificae	32.8	Complete Genome	ftp://ftp.ncbi.nlm.nih.gov/genomes/all/GCA/000/021/545/GCA_000021545.1_ASM2154v1
Persephonella marina EX-H1	123214	Aquificae	Aquificae	37.1242	Complete Genome	ftp://ftp.ncbi.nlm.nih.gov/genomes/all/GCA/000/021/565/GCA_000021565.1_ASM2156v1
Thermocrinis albus DSM 14484	638303	Aquificae	Aquificae	46.9	Complete Genome	ftp://ftp.ncbi.nlm.nih.gov/genomes/all/GCA/000/025/605/GCA_000025605.1_ASM2560v1
Thermovibrio ammonificans HB-1	648996	Aquificae	Aquificae	52.1174	Complete Genome	ftp://ftp.ncbi.nlm.nih.gov/genomes/all/GCA/000/185/805/GCA_000185805.1_ASM18580v1
Desulfurobacterium thermolithotrophum DSM 11699	868864	Aquificae	Aquificae	34.9	Complete Genome	ftp://ftp.ncbi.nlm.nih.gov/genomes/all/GCA/000/191/045/GCA_000191045.1_ASM19104v1
Hydrogenobaculum sp. 3684	547143	Aquificae	Aquificae	34.8	Complete Genome	ftp://ftp.ncbi.nlm.nih.gov/genomes/all/GCA/000/213/785/GCA_000213785.1_ASM21378v1
Hydrogenobaculum sp. SHO	547145	Aquificae	Aquificae	34.8	Complete Genome	ftp://ftp.ncbi.nlm.nih.gov/genomes/all/GCA/000/215/065/GCA_000215065.1_ASM21506v1
Hydrogenobaculum sp. HO	547144	Aquificae	Aquificae	34.8	Complete Genome	ftp://ftp.ncbi.nlm.nih.gov/genomes/all/GCA/000/341/855/GCA_000341855.1_ASM34185v1
Hydrogenobaculum sp. SN	547146	Aquificae	Aquificae	34.8	Complete Genome	ftp://ftp.ncbi.nlm.nih.gov/genomes/all/GCA/000/348/765/GCA_000348765.2_ASM34876v2
Thermocrinis ruber	75906	Aquificae	Aquificae	45.2	Complete Genome	ftp://ftp.ncbi.nlm.nih.gov/genomes/all/GCA/000/512/735/GCA_000512735.1_ASM51273v1
Thermosulfidibacter takaii ABI70S6	1298851	Aquificae	Aquificae	43	Complete Genome	ftp://ftp.ncbi.nlm.nih.gov/genomes/all/GCA/001/547/735/GCA_001547735.1_ASM154773v1
Caldisericum exile AZM16c01	511051	Caldiserica/Cryosericota group	Caldiserica	35.4	Complete Genome	ftp://ftp.ncbi.nlm.nih.gov/genomes/all/GCA/000/284/335/GCA_000284335.1_ASM28433v1
Caldithrix abyssi DSM 13497	880073	Calditrichaeota	Calditrichae	45.1	Complete Genome	ftp://ftp.ncbi.nlm.nih.gov/genomes/all/GCA/001/886/815/GCA_001886815.1_ASM188681v1
Desulfurispirillum indicum S5	653733	Chrysiogenetes	Chrysiogenetes	56.1	Complete Genome	ftp://ftp.ncbi.nlm.nih.gov/genomes/all/GCA/000/177/635/GCA_000177635.2_ASM17763v2
Coprothermobacter proteolyticus DSM 5265	309798	Coprothermobacterota	Coprothermobacteria	44.8	Complete Genome	ftp://ftp.ncbi.nlm.nih.gov/genomes/all/GCA/000/020/945/GCA_000020945.1_ASM2094v1
Deferribacter desulfuricans SSM1	639282	Deferribacteres	Deferribacteres	30.2992	Complete Genome	ftp://ftp.ncbi.nlm.nih.gov/genomes/all/GCA/000/010/985/GCA_000010985.1_ASM1098v1
Denitrovibrio acetiphilus DSM 12809	522772	Deferribacteres	Deferribacteres	42.5	Complete Genome	ftp://ftp.ncbi.nlm.nih.gov/genomes/all/GCA/000/025/725/GCA_000025725.1_ASM2572v1
Calditerrivibrio nitroreducens DSM 19672	768670	Deferribacteres	Deferribacteres	35.6755	Complete Genome	ftp://ftp.ncbi.nlm.nih.gov/genomes/all/GCA/000/183/405/GCA_000183405.1_ASM18340v1
Flexistipes sinusarabici DSM 4947	717231	Deferribacteres	Deferribacteres	38.3	Complete Genome	ftp://ftp.ncbi.nlm.nih.gov/genomes/all/GCA/000/218/625/GCA_000218625.1_ASM21862v1
Geovibrio thiophilus	139438	Deferribacteres	Deferribacteres	48.1	Complete Genome	ftp://ftp.ncbi.nlm.nih.gov/genomes/all/GCA/004/087/915/GCA_004087915.1_ASM408791v1
Dictyoglomus thermophilum H-6-12	309799	Dictyoglomi	Dictyoglomia	33.7	Complete Genome	ftp://ftp.ncbi.nlm.nih.gov/genomes/all/GCA/000/020/965/GCA_000020965.1_ASM2096v1
Dictyoglomus turgidum DSM 6724	515635	Dictyoglomi	Dictyoglomia	34	Complete Genome	ftp://ftp.ncbi.nlm.nih.gov/genomes/all/GCA/000/021/645/GCA_000021645.1_ASM2164v1
Elusimicrobium minutum Pei191	445932	Elusimicrobia	Elusimicrobia	40	Complete Genome	ftp://ftp.ncbi.nlm.nih.gov/genomes/all/GCA/000/020/145/GCA_000020145.1_ASM2014v1
Endomicrobium proavitum	1408281	Elusimicrobia	Endomicrobia	39.3	Complete Genome	ftp://ftp.ncbi.nlm.nih.gov/genomes/all/GCA/001/027/545/GCA_001027545.1_ASM102754v1
Candidatus Endomicrobium trichonymphae	1408204	Elusimicrobia	Endomicrobia	35.2657	Complete Genome	ftp://ftp.ncbi.nlm.nih.gov/genomes/all/GCA/002/355/835/GCA_002355835.1_ASM235583v1
uncultured Termite group 1 bacterium phylotype Rs-D17	471821	Elusimicrobia	environmental samples	35.1773	Complete Genome	ftp://ftp.ncbi.nlm.nih.gov/genomes/all/GCA/000/146/025/GCA_000146025.1_ASM14602v1
Chlorobaculum tepidum TLS	194439	FCB group	Bacteroidetes/Chlorobi group	56.5	Complete Genome	ftp://ftp.ncbi.nlm.nih.gov/genomes/all/GCA/000/006/985/GCA_000006985.1_ASM698v1
Porphyromonas gingivalis W83	242619	FCB group	Bacteroidetes/Chlorobi group	48.3	Complete Genome	ftp://ftp.ncbi.nlm.nih.gov/genomes/all/GCA/000/007/585/GCA_000007585.1_ASM758v1
Bacteroides fragilis YCH46	295405	FCB group	Bacteroidetes/Chlorobi group	43.2378	Complete Genome	ftp://ftp.ncbi.nlm.nih.gov/genomes/all/GCA/000/009/925/GCA_000009925.1_ASM992v1
Candidatus Azobacteroides pseudotrichonymphae genomovar. CFP2	511995	FCB group	Bacteroidetes/Chlorobi group	32.9857	Complete Genome	ftp://ftp.ncbi.nlm.nih.gov/genomes/all/GCA/000/010/645/GCA_000010645.1_ASM1064v1
Bacteroides thetaiotaomicron VPI-5482	226186	FCB group	Bacteroidetes/Chlorobi group	42.8231	Complete Genome	ftp://ftp.ncbi.nlm.nih.gov/genomes/all/GCA/000/011/065/GCA_000011065.1_ASM1106v1
Pelodictyon luteolum DSM 273	319225	FCB group	Bacteroidetes/Chlorobi group	57.3	Complete Genome	ftp://ftp.ncbi.nlm.nih.gov/genomes/all/GCA/000/012/485/GCA_000012485.1_ASM1248v1
Chlorobium chlorochromatii CaD3	340177	FCB group	Bacteroidetes/Chlorobi group	44.3	Complete Genome	ftp://ftp.ncbi.nlm.nih.gov/genomes/all/GCA/000/012/585/GCA_000012585.1_ASM1258v1
Bacteroides vulgatus ATCC 8482	435590	FCB group	Bacteroidetes/Chlorobi group	42.2	Complete Genome	ftp://ftp.ncbi.nlm.nih.gov/genomes/all/GCA/000/012/825/GCA_000012825.1_ASM1282v1
Salinibacter ruber DSM 13855	309807	FCB group	Bacteroidetes/Chlorobi group	66.1179	Complete Genome	ftp://ftp.ncbi.nlm.nih.gov/genomes/all/GCA/000/013/045/GCA_000013045.1_ASM1304v1
Cytophaga hutchinsonii ATCC 33406	269798	FCB group	Bacteroidetes/Chlorobi group	38.8	Complete Genome	ftp://ftp.ncbi.nlm.nih.gov/genomes/all/GCA/000/014/145/GCA_000014145.1_ASM1414v1
Chlorobium phaeobacteroides DSM 266	290317	FCB group	Bacteroidetes/Chlorobi group	48.4	Complete Genome	ftp://ftp.ncbi.nlm.nih.gov/genomes/all/GCA/000/015/125/GCA_000015125.1_ASM1512v1
Chlorobium phaeovibrioides DSM 265	290318	FCB group	Bacteroidetes/Chlorobi group	53	Complete Genome	ftp://ftp.ncbi.nlm.nih.gov/genomes/all/GCA/000/016/085/GCA_000016085.1_ASM1608v1
Flavobacterium johnsoniae UW101	376686	FCB group	Bacteroidetes/Chlorobi group	34.1	Complete Genome	ftp://ftp.ncbi.nlm.nih.gov/genomes/all/GCA/000/016/645/GCA_000016645.1_ASM1664v1
Candidatus Sulcia muelleri GWSS	444179	FCB group	Bacteroidetes/Chlorobi group	22.4	Complete Genome	ftp://ftp.ncbi.nlm.nih.gov/genomes/all/GCA/000/017/525/GCA_000017525.1_ASM1752v1
Chlorobium limicola DSM 245	290315	FCB group	Bacteroidetes/Chlorobi group	51.3	Complete Genome	ftp://ftp.ncbi.nlm.nih.gov/genomes/all/GCA/000/020/465/GCA_000020465.1_ASM2046v1
Chlorobaculum parvum NCIB 8327	517417	FCB group	Bacteroidetes/Chlorobi group	55.8	Complete Genome	ftp://ftp.ncbi.nlm.nih.gov/genomes/all/GCA/000/020/505/GCA_000020505.1_ASM2050v1
Chloroherpeton thalassium ATCC 35110	517418	FCB group	Bacteroidetes/Chlorobi group	45	Complete Genome	ftp://ftp.ncbi.nlm.nih.gov/genomes/all/GCA/000/020/525/GCA_000020525.1_ASM2052v1
Chlorobium phaeobacteroides BS1	331678	FCB group	Bacteroidetes/Chlorobi group	48.9	Complete Genome	ftp://ftp.ncbi.nlm.nih.gov/genomes/all/GCA/000/020/545/GCA_000020545.1_ASM2054v1
Candidatus Amoebophilus asiaticus 5a2	452471	FCB group	Bacteroidetes/Chlorobi group	35	Complete Genome	ftp://ftp.ncbi.nlm.nih.gov/genomes/all/GCA/000/020/565/GCA_000020565.1_ASM2056v1
Prosthecochloris aestuarii DSM 271	290512	FCB group	Bacteroidetes/Chlorobi group	50.1104	Complete Genome	ftp://ftp.ncbi.nlm.nih.gov/genomes/all/GCA/000/020/625/GCA_000020625.1_ASM2062v1
Pelodictyon phaeoclathratiforme BU-1	324925	FCB group	Bacteroidetes/Chlorobi group	48.1	Complete Genome	ftp://ftp.ncbi.nlm.nih.gov/genomes/all/GCA/000/020/645/GCA_000020645.1_ASM2064v1
Blattabacterium sp. (Blattella germanica) str. Bge	331104	FCB group	Bacteroidetes/Chlorobi group	27.1172	Complete Genome	ftp://ftp.ncbi.nlm.nih.gov/genomes/all/GCA/000/022/605/GCA_000022605.2_ASM2260v1
Candidatus Sulcia muelleri SMDSEM	595499	FCB group	Bacteroidetes/Chlorobi group	22.6	Complete Genome	ftp://ftp.ncbi.nlm.nih.gov/genomes/all/GCA/000/022/945/GCA_000022945.1_ASM2294v1
Dyadobacter fermentans DSM 18053	471854	FCB group	Bacteroidetes/Chlorobi group	51.5	Complete Genome	ftp://ftp.ncbi.nlm.nih.gov/genomes/all/GCA/000/023/125/GCA_000023125.1_ASM2312v1
Capnocytophaga ochracea DSM 7271	521097	FCB group	Bacteroidetes/Chlorobi group	39.6	Complete Genome	ftp://ftp.ncbi.nlm.nih.gov/genomes/all/GCA/000/023/285/GCA_000023285.1_ASM2328v1
Zunongwangia profunda SM-A87	655815	FCB group	Bacteroidetes/Chlorobi group	36.2	Complete Genome	ftp://ftp.ncbi.nlm.nih.gov/genomes/all/GCA/000/023/465/GCA_000023465.1_ASM2346v1
Flavobacteriaceae bacterium 3519-10	531844	FCB group	Bacteroidetes/Chlorobi group	42.7	Complete Genome	ftp://ftp.ncbi.nlm.nih.gov/genomes/all/GCA/000/023/725/GCA_000023725.1_ASM2372v1
Pedobacter heparinus DSM 2366	485917	FCB group	Bacteroidetes/Chlorobi group	42	Complete Genome	ftp://ftp.ncbi.nlm.nih.gov/genomes/all/GCA/000/023/825/GCA_000023825.1_ASM2382v1
Chitinophaga pinensis DSM 2588	485918	FCB group	Bacteroidetes/Chlorobi group	45.2	Complete Genome	ftp://ftp.ncbi.nlm.nih.gov/genomes/all/GCA/000/024/005/GCA_000024005.1_ASM2400v1
Robiginitalea biformata HTCC2501	313596	FCB group	Bacteroidetes/Chlorobi group	55.3	Complete Genome	ftp://ftp.ncbi.nlm.nih.gov/genomes/all/GCA/000/024/125/GCA_000024125.1_ASM2412v1
Spirosoma linguale DSM 74	504472	FCB group	Bacteroidetes/Chlorobi group	50.1563	Complete Genome	ftp://ftp.ncbi.nlm.nih.gov/genomes/all/GCA/000/024/525/GCA_000024525.1_ASM2452v1
Rhodothermus marinus DSM 4252	518766	FCB group	Bacteroidetes/Chlorobi group	64.2672	Complete Genome	ftp://ftp.ncbi.nlm.nih.gov/genomes/all/GCA/000/024/845/GCA_000024845.1_ASM2484v1
Candidatus Sulcia muelleri DMIN	641892	FCB group	Bacteroidetes/Chlorobi group	22.5	Complete Genome	ftp://ftp.ncbi.nlm.nih.gov/genomes/all/GCA/000/025/785/GCA_000025785.1_ASM2578v1
Prevotella ruminicola 23	264731	FCB group	Bacteroidetes/Chlorobi group	47.7	Complete Genome	ftp://ftp.ncbi.nlm.nih.gov/genomes/all/GCA/000/025/925/GCA_000025925.1_ASM2592v1
Bacteroides fragilis NCTC 9343	272559	FCB group	Bacteroidetes/Chlorobi group	43.1233	Complete Genome	ftp://ftp.ncbi.nlm.nih.gov/genomes/all/GCA/000/025/985/GCA_000025985.1_ASM2598v1
Gramella forsetii KT0803	411154	FCB group	Bacteroidetes/Chlorobi group	36.6	Complete Genome	ftp://ftp.ncbi.nlm.nih.gov/genomes/all/GCA/000/060/345/GCA_000060345.1_ASM6034v1
Flavobacterium psychrophilum JIP02/86	402612	FCB group	Bacteroidetes/Chlorobi group	32.5	Complete Genome	ftp://ftp.ncbi.nlm.nih.gov/genomes/all/GCA/000/064/305/GCA_000064305.2_ASM6430v2
Salinibacter ruber M8	761659	FCB group	Bacteroidetes/Chlorobi group	65.8339	Complete Genome	ftp://ftp.ncbi.nlm.nih.gov/genomes/all/GCA/000/090/405/GCA_000090405.1_ASM9040v2
Blattabacterium sp. (Periplaneta americana) str. BPLAN	600809	FCB group	Bacteroidetes/Chlorobi group	28.2016	Complete Genome	ftp://ftp.ncbi.nlm.nih.gov/genomes/all/GCA/000/093/165/GCA_000093165.1_ASM9316v1
Prevotella melaninogenica ATCC 25845	553174	FCB group	Bacteroidetes/Chlorobi group	40.9866	Complete Genome	ftp://ftp.ncbi.nlm.nih.gov/genomes/all/GCA/000/144/405/GCA_000144405.1_ASM14440v1
Candidatus Sulcia muelleri CARI	706194	FCB group	Bacteroidetes/Chlorobi group	21.1	Complete Genome	ftp://ftp.ncbi.nlm.nih.gov/genomes/all/GCA/000/147/035/GCA_000147035.1_ASM14703v1
Dokdonia sp. MED134	313590	FCB group	Bacteroidetes/Chlorobi group	38.2	Complete Genome	ftp://ftp.ncbi.nlm.nih.gov/genomes/all/GCA/000/152/925/GCA_000152925.3_ASM15292v3
Polaribacter sp. MED152	313598	FCB group	Bacteroidetes/Chlorobi group	30.6	Complete Genome	ftp://ftp.ncbi.nlm.nih.gov/genomes/all/GCA/000/152/945/GCA_000152945.2_ASM15294v2
Maribacter sp. HTCC2170	313603	FCB group	Bacteroidetes/Chlorobi group	37	Complete Genome	ftp://ftp.ncbi.nlm.nih.gov/genomes/all/GCA/000/153/165/GCA_000153165.2_ASM15316v2
Psychroflexus torquis ATCC 700755	313595	FCB group	Bacteroidetes/Chlorobi group	34.5	Complete Genome	ftp://ftp.ncbi.nlm.nih.gov/genomes/all/GCA/000/153/485/GCA_000153485.2_ASM15348v2
Prevotella sp. oral taxon 299 str. F0039	575614	FCB group	Bacteroidetes/Chlorobi group	37.5003	Complete Genome	ftp://ftp.ncbi.nlm.nih.gov/genomes/all/GCA/000/163/055/GCA_000163055.2_ASM16305v2
Leadbetterella byssophila DSM 17132	649349	FCB group	Bacteroidetes/Chlorobi group	40.4	Complete Genome	ftp://ftp.ncbi.nlm.nih.gov/genomes/all/GCA/000/166/395/GCA_000166395.1_ASM16639v1
Paludibacter propionicigenes WB4	694427	FCB group	Bacteroidetes/Chlorobi group	38.9	Complete Genome	ftp://ftp.ncbi.nlm.nih.gov/genomes/all/GCA/000/183/135/GCA_000183135.1_ASM18313v1
Marivirga tractuosa DSM 4126	643867	FCB group	Bacteroidetes/Chlorobi group	35.5046	Complete Genome	ftp://ftp.ncbi.nlm.nih.gov/genomes/all/GCA/000/183/425/GCA_000183425.1_ASM18342v1
Bacteroides helcogenes P 36-108	693979	FCB group	Bacteroidetes/Chlorobi group	44.7	Complete Genome	ftp://ftp.ncbi.nlm.nih.gov/genomes/all/GCA/000/186/225/GCA_000186225.1_ASM18622v1
Cellulophaga algicola DSM 14237	688270	FCB group	Bacteroidetes/Chlorobi group	33.8	Complete Genome	ftp://ftp.ncbi.nlm.nih.gov/genomes/all/GCA/000/186/265/GCA_000186265.1_ASM18626v1
Weeksella virosa DSM 16922	865938	FCB group	Bacteroidetes/Chlorobi group	35.9	Complete Genome	ftp://ftp.ncbi.nlm.nih.gov/genomes/all/GCA/000/189/415/GCA_000189415.1_ASM18941v1
Odoribacter splanchnicus DSM 20712	709991	FCB group	Bacteroidetes/Chlorobi group	43.4	Complete Genome	ftp://ftp.ncbi.nlm.nih.gov/genomes/all/GCA/000/190/535/GCA_000190535.1_ASM19053v1
Bacteroides salanitronis DSM 18170	667015	FCB group	Bacteroidetes/Chlorobi group	46.4428	Complete Genome	ftp://ftp.ncbi.nlm.nih.gov/genomes/all/GCA/000/190/575/GCA_000190575.1_ASM19057v1
Cellulophaga lytica DSM 7489	867900	FCB group	Bacteroidetes/Chlorobi group	32.1	Complete Genome	ftp://ftp.ncbi.nlm.nih.gov/genomes/all/GCA/000/190/595/GCA_000190595.1_ASM19059v1
Pseudopedobacter saltans DSM 12145	762903	FCB group	Bacteroidetes/Chlorobi group	36.6	Complete Genome	ftp://ftp.ncbi.nlm.nih.gov/genomes/all/GCA/000/190/735/GCA_000190735.2_ASM19073v2
Riemerella anatipestifer RA-GD	992406	FCB group	Bacteroidetes/Chlorobi group	35	Complete Genome	ftp://ftp.ncbi.nlm.nih.gov/genomes/all/GCA/000/191/565/GCA_000191565.1_ASM19156v1
Sphingobacterium sp. 21	743722	FCB group	Bacteroidetes/Chlorobi group	41.1	Complete Genome	ftp://ftp.ncbi.nlm.nih.gov/genomes/all/GCA/000/192/845/GCA_000192845.1_ASM19284v1
Prevotella denticola F0289	767031	FCB group	Bacteroidetes/Chlorobi group	50.4	Complete Genome	ftp://ftp.ncbi.nlm.nih.gov/genomes/all/GCA/000/193/395/GCA_000193395.1_ASM19339v1
Fluviicola taffensis DSM 16823	755732	FCB group	Bacteroidetes/Chlorobi group	36.5	Complete Genome	ftp://ftp.ncbi.nlm.nih.gov/genomes/all/GCA/000/194/605/GCA_000194605.1_ASM19460v1
Croceibacter atlanticus HTCC2559	216432	FCB group	Bacteroidetes/Chlorobi group	33.9	Complete Genome	ftp://ftp.ncbi.nlm.nih.gov/genomes/all/GCA/000/196/315/GCA_000196315.1_ASM19631v1
Bacteroides fragilis 638R	862962	FCB group	Bacteroidetes/Chlorobi group	43.4	Complete Genome	ftp://ftp.ncbi.nlm.nih.gov/genomes/all/GCA/000/210/835/GCA_000210835.1_ASM21083v1
Lacinutrix sp. 5H-3-7-4	983544	FCB group	Bacteroidetes/Chlorobi group	30.8	Complete Genome	ftp://ftp.ncbi.nlm.nih.gov/genomes/all/GCA/000/211/855/GCA_000211855.3_ASM21185v3
Dokdonia sp. 4H-3-7-5	983548	FCB group	Bacteroidetes/Chlorobi group	37.3	Complete Genome	ftp://ftp.ncbi.nlm.nih.gov/genomes/all/GCA/000/212/355/GCA_000212355.1_ASM21235v1
Porphyromonas asaccharolytica DSM 20707	879243	FCB group	Bacteroidetes/Chlorobi group	52.5	Complete Genome	ftp://ftp.ncbi.nlm.nih.gov/genomes/all/GCA/000/212/375/GCA_000212375.1_ASM21237v1
Haliscomenobacter hydrossis DSM 1100	760192	FCB group	Bacteroidetes/Chlorobi group	47.0706	Complete Genome	ftp://ftp.ncbi.nlm.nih.gov/genomes/all/GCA/000/212/735/GCA_000212735.1_ASM21273v1
Runella slithyformis DSM 19594	761193	FCB group	Bacteroidetes/Chlorobi group	46.4335	Complete Genome	ftp://ftp.ncbi.nlm.nih.gov/genomes/all/GCA/000/218/895/GCA_000218895.1_ASM21889v1
Capnocytophaga canimorsus Cc5	860228	FCB group	Bacteroidetes/Chlorobi group	36.1	Complete Genome	ftp://ftp.ncbi.nlm.nih.gov/genomes/all/GCA/000/220/625/GCA_000220625.1_ASM22062v1
Cyclobacterium marinum DSM 745	880070	FCB group	Bacteroidetes/Chlorobi group	38.1	Complete Genome	ftp://ftp.ncbi.nlm.nih.gov/genomes/all/GCA/000/222/485/GCA_000222485.1_ASM22248v1
Muricauda ruestringensis DSM 13258	886377	FCB group	Bacteroidetes/Chlorobi group	41.4	Complete Genome	ftp://ftp.ncbi.nlm.nih.gov/genomes/all/GCA/000/224/085/GCA_000224085.1_ASM22408v1
Rhodothermus marinus SG0.5JP17-172	762570	FCB group	Bacteroidetes/Chlorobi group	64.2484	Complete Genome	ftp://ftp.ncbi.nlm.nih.gov/genomes/all/GCA/000/224/745/GCA_000224745.1_ASM22474v1
Blattabacterium sp. (Mastotermes darwiniensis) str. MADAR	1074889	FCB group	Bacteroidetes/Chlorobi group	27.523	Complete Genome	ftp://ftp.ncbi.nlm.nih.gov/genomes/all/GCA/000/233/435/GCA_000233435.1_ASM23343v1
Blattabacterium sp. (Cryptocercus punctulatus) str. Cpu	1075399	FCB group	Bacteroidetes/Chlorobi group	23.8419	Complete Genome	ftp://ftp.ncbi.nlm.nih.gov/genomes/all/GCA/000/236/405/GCA_000236405.1_ASM23640v1
Owenweeksia hongkongensis DSM 17368	926562	FCB group	Bacteroidetes/Chlorobi group	40.2	Complete Genome	ftp://ftp.ncbi.nlm.nih.gov/genomes/all/GCA/000/236/705/GCA_000236705.1_ASM23670v1
Tannerella forsythia 92A2	203275	FCB group	Bacteroidetes/Chlorobi group	47	Complete Genome	ftp://ftp.ncbi.nlm.nih.gov/genomes/all/GCA/000/238/215/GCA_000238215.1_ASM23821v1
Flavobacterium columnare ATCC 49512	1041826	FCB group	Bacteroidetes/Chlorobi group	31.5	Complete Genome	ftp://ftp.ncbi.nlm.nih.gov/genomes/all/GCA/000/240/075/GCA_000240075.2_ASM24007v2
Elizabethkingia anophelis Ag1	1117646	FCB group	Bacteroidetes/Chlorobi group	35.5	Complete Genome	ftp://ftp.ncbi.nlm.nih.gov/genomes/all/GCA/000/240/095/GCA_000240095.3_ASM24009v3
Prevotella dentalis DSM 3688	908937	FCB group	Bacteroidetes/Chlorobi group	55.86	Complete Genome	ftp://ftp.ncbi.nlm.nih.gov/genomes/all/GCA/000/242/335/GCA_000242335.3_ASM24233v3
Solitalea canadensis DSM 3403	929556	FCB group	Bacteroidetes/Chlorobi group	37.3	Complete Genome	ftp://ftp.ncbi.nlm.nih.gov/genomes/all/GCA/000/242/635/GCA_000242635.3_ASM24263v3
Niabella soli DSM 19437	929713	FCB group	Bacteroidetes/Chlorobi group	45.2	Complete Genome	ftp://ftp.ncbi.nlm.nih.gov/genomes/all/GCA/000/243/115/GCA_000243115.3_ASM24311v3
Niastella koreensis GR20-10	700598	FCB group	Bacteroidetes/Chlorobi group	44.9	Complete Genome	ftp://ftp.ncbi.nlm.nih.gov/genomes/all/GCA/000/246/855/GCA_000246855.1_ASM24685v1
Saprospira grandis str. Lewin	984262	FCB group	Bacteroidetes/Chlorobi group	46.4012	Complete Genome	ftp://ftp.ncbi.nlm.nih.gov/genomes/all/GCA/000/250/635/GCA_000250635.1_ASM25063v1
Riemerella anatipestifer ATCC 11845 = DSM 15868	693978	FCB group	Bacteroidetes/Chlorobi group	35	Complete Genome	ftp://ftp.ncbi.nlm.nih.gov/genomes/all/GCA/000/252/855/GCA_000252855.1_ASM25285v1
Flavobacterium branchiophilum FL-15	1034807	FCB group	Bacteroidetes/Chlorobi group	32.9006	Complete Genome	ftp://ftp.ncbi.nlm.nih.gov/genomes/all/GCA/000/253/275/GCA_000253275.1_ASM25327v1
Ignavibacterium album JCM 16511	945713	FCB group	Bacteroidetes/Chlorobi group	33.9	Complete Genome	ftp://ftp.ncbi.nlm.nih.gov/genomes/all/GCA/000/258/405/GCA_000258405.1_ASM25840v1
Prevotella intermedia 17	246198	FCB group	Bacteroidetes/Chlorobi group	43.465	Complete Genome	ftp://ftp.ncbi.nlm.nih.gov/genomes/all/GCA/000/261/025/GCA_000261025.1_ASM26102v1
Blattabacterium sp. (Blaberus giganteus)	1186051	FCB group	Bacteroidetes/Chlorobi group	25.7281	Complete Genome	ftp://ftp.ncbi.nlm.nih.gov/genomes/all/GCA/000/262/715/GCA_000262715.1_ASM26271v1
Emticicia oligotrophica DSM 17448	929562	FCB group	Bacteroidetes/Chlorobi group	35.5843	Complete Genome	ftp://ftp.ncbi.nlm.nih.gov/genomes/all/GCA/000/263/195/GCA_000263195.1_ASM26319v1
Alistipes finegoldii DSM 17242	679935	FCB group	Bacteroidetes/Chlorobi group	56.6	Complete Genome	ftp://ftp.ncbi.nlm.nih.gov/genomes/all/GCA/000/265/365/GCA_000265365.1_ASM26536v1
Aequorivita sublithincola DSM 14238	746697	FCB group	Bacteroidetes/Chlorobi group	36.2	Complete Genome	ftp://ftp.ncbi.nlm.nih.gov/genomes/all/GCA/000/265/385/GCA_000265385.1_ASM26538v1
Belliella baltica DSM 15883	866536	FCB group	Bacteroidetes/Chlorobi group	36.8	Complete Genome	ftp://ftp.ncbi.nlm.nih.gov/genomes/all/GCA/000/265/405/GCA_000265405.1_ASM26540v1
Ornithobacterium rhinotracheale DSM 15997	867902	FCB group	Bacteroidetes/Chlorobi group	37.2	Complete Genome	ftp://ftp.ncbi.nlm.nih.gov/genomes/all/GCA/000/265/465/GCA_000265465.1_ASM26546v1
Bernardetia litoralis DSM 6794	880071	FCB group	Bacteroidetes/Chlorobi group	30.7	Complete Genome	ftp://ftp.ncbi.nlm.nih.gov/genomes/all/GCA/000/265/505/GCA_000265505.1_ASM26550v1
Porphyromonas gingivalis TDC60	1030843	FCB group	Bacteroidetes/Chlorobi group	48.3	Complete Genome	ftp://ftp.ncbi.nlm.nih.gov/genomes/all/GCA/000/270/225/GCA_000270225.1_ASM27022v1
Melioribacter roseus P3M-2	1191523	FCB group	Bacteroidetes/Chlorobi group	41.3	Complete Genome	ftp://ftp.ncbi.nlm.nih.gov/genomes/all/GCA/000/279/145/GCA_000279145.1_ASM27914v1
Riemerella anatipestifer RA-CH-1	1228997	FCB group	Bacteroidetes/Chlorobi group	35.1	Complete Genome	ftp://ftp.ncbi.nlm.nih.gov/genomes/all/GCA/000/295/655/GCA_000295655.1_ASM29565v1
Cardinium endosymbiont cEper1 of Encarsia pergandiella	1231626	FCB group	Bacteroidetes/Chlorobi group	36.288	Complete Genome	ftp://ftp.ncbi.nlm.nih.gov/genomes/all/GCA/000/304/455/GCA_000304455.1_CCh_cEper1
Echinicola vietnamensis DSM 17526	926556	FCB group	Bacteroidetes/Chlorobi group	44.8	Complete Genome	ftp://ftp.ncbi.nlm.nih.gov/genomes/all/GCA/000/325/705/GCA_000325705.1_ASM32570v1
Riemerella anatipestifer RA-CH-2	1271752	FCB group	Bacteroidetes/Chlorobi group	35	Complete Genome	ftp://ftp.ncbi.nlm.nih.gov/genomes/all/GCA/000/331/695/GCA_000331695.1_ASM33169v1
Candidatus Uzinura diaspidicola str. ASNER	1133592	FCB group	Bacteroidetes/Chlorobi group	30.2	Complete Genome	ftp://ftp.ncbi.nlm.nih.gov/genomes/all/GCA/000/331/975/GCA_000331975.1_ASM33197v1
Nonlabens dokdonensis DSW-6	592029	FCB group	Bacteroidetes/Chlorobi group	35.3	Complete Genome	ftp://ftp.ncbi.nlm.nih.gov/genomes/all/GCA/000/332/115/GCA_000332115.1_ASM33211v1
Blattabacterium sp. (Blatta orientalis) str. Tarazona	1072467	FCB group	Bacteroidetes/Chlorobi group	28.214	Complete Genome	ftp://ftp.ncbi.nlm.nih.gov/genomes/all/GCA/000/334/405/GCA_000334405.1_ASM33440v1
Blattabacterium cuenoti BPAA	1229512	FCB group	Bacteroidetes/Chlorobi group	26.4	Complete Genome	ftp://ftp.ncbi.nlm.nih.gov/genomes/all/GCA/000/348/805/GCA_000348805.1_ASM34880v1
Candidatus Sulcia muelleri str. Sulcia-ALF	1343076	FCB group	Bacteroidetes/Chlorobi group	24	Complete Genome	ftp://ftp.ncbi.nlm.nih.gov/genomes/all/GCA/000/442/635/GCA_000442635.1_ASM44263v1
Flavobacterium indicum GPTSA100-9 = DSM 17447	1094466	FCB group	Bacteroidetes/Chlorobi group	31.4	Complete Genome	ftp://ftp.ncbi.nlm.nih.gov/genomes/all/GCA/000/455/605/GCA_000455605.1_GPTSA100-9
Cellulophaga baltica 18	1348584	FCB group	Bacteroidetes/Chlorobi group	34.7	Complete Genome	ftp://ftp.ncbi.nlm.nih.gov/genomes/all/GCA/000/468/615/GCA_000468615.2_ASM46861v2
Blattabacterium sp. (Nauphoeta cinerea)	1316444	FCB group	Bacteroidetes/Chlorobi group	26.0678	Complete Genome	ftp://ftp.ncbi.nlm.nih.gov/genomes/all/GCA/000/471/965/GCA_000471965.1_ASM47196v1
Bacteroidales bacterium CF	1400053	FCB group	Bacteroidetes/Chlorobi group	41.5	Complete Genome	ftp://ftp.ncbi.nlm.nih.gov/genomes/all/GCA/000/473/305/GCA_000473305.1_ASM47330v1
Cellulophaga baltica NN016038	1348585	FCB group	Bacteroidetes/Chlorobi group	34.7	Complete Genome	ftp://ftp.ncbi.nlm.nih.gov/genomes/all/GCA/000/477/035/GCA_000477035.2_ASM47703v2
Elizabethkingia anophelis NUHP1	1338011	FCB group	Bacteroidetes/Chlorobi group	35.6	Complete Genome	ftp://ftp.ncbi.nlm.nih.gov/genomes/all/GCA/000/495/935/GCA_000495935.2_ASM49593v2
Barnesiella viscericola DSM 18177	880074	FCB group	Bacteroidetes/Chlorobi group	51.7	Complete Genome	ftp://ftp.ncbi.nlm.nih.gov/genomes/all/GCA/000/512/915/GCA_000512915.1_ASM51291v1
Hymenobacter swuensis DY53	1227739	FCB group	Bacteroidetes/Chlorobi group	59.6512	Complete Genome	ftp://ftp.ncbi.nlm.nih.gov/genomes/all/GCA/000/576/555/GCA_000576555.1_ASM57655v1
Flammeovirgaceae bacterium 311	1257021	FCB group	Bacteroidetes/Chlorobi group	46.5	Complete Genome	ftp://ftp.ncbi.nlm.nih.gov/genomes/all/GCA/000/597/885/GCA_000597885.1_ASM59788v1
Draconibacterium orientale	1168034	FCB group	Bacteroidetes/Chlorobi group	41.3	Complete Genome	ftp://ftp.ncbi.nlm.nih.gov/genomes/all/GCA/000/626/635/GCA_000626635.1_ASM62663v1
Candidatus Walczuchella monophlebidarum	1415657	FCB group	Bacteroidetes/Chlorobi group	32.7	Complete Genome	ftp://ftp.ncbi.nlm.nih.gov/genomes/all/GCA/000/709/555/GCA_000709555.1_ASM70955v1
Mucinivorans hirudinis	1433126	FCB group	Bacteroidetes/Chlorobi group	44.9	Complete Genome	ftp://ftp.ncbi.nlm.nih.gov/genomes/all/GCA/000/723/505/GCA_000723505.1_Mucivorans_M3_Nelson-Bomar-Fixed
Riemerella anatipestifer CH3	1354240	FCB group	Bacteroidetes/Chlorobi group	35.2	Complete Genome	ftp://ftp.ncbi.nlm.nih.gov/genomes/all/GCA/000/734/055/GCA_000734055.1_ASM73405v1
Hymenobacter sp. APR13	1356852	FCB group	Bacteroidetes/Chlorobi group	61.8123	Complete Genome	ftp://ftp.ncbi.nlm.nih.gov/genomes/all/GCA/000/737/515/GCA_000737515.1_ASM73751v1
Flavobacterium psychrophilum	96345	FCB group	Bacteroidetes/Chlorobi group	32.5	Complete Genome	ftp://ftp.ncbi.nlm.nih.gov/genomes/all/GCA/000/739/395/GCA_000739395.1_ASM73939v1
Sphingobacterium sp. ML3W	1538644	FCB group	Bacteroidetes/Chlorobi group	37	Complete Genome	ftp://ftp.ncbi.nlm.nih.gov/genomes/all/GCA/000/747/525/GCA_000747525.1_ASM74752v1
Flavobacterium psychrophilum FPG101	1452725	FCB group	Bacteroidetes/Chlorobi group	32.6	Complete Genome	ftp://ftp.ncbi.nlm.nih.gov/genomes/all/GCA/000/754/365/GCA_000754365.1_ASM75436v1
Flavobacterium psychrophilum FPG3	1452724	FCB group	Bacteroidetes/Chlorobi group	32.7	Complete Genome	ftp://ftp.ncbi.nlm.nih.gov/genomes/all/GCA/000/754/405/GCA_000754405.1_ASM75440v1
Ornithobacterium rhinotracheale ORT-UMN 88	1401325	FCB group	Bacteroidetes/Chlorobi group	37.5	Complete Genome	ftp://ftp.ncbi.nlm.nih.gov/genomes/all/GCA/000/756/505/GCA_000756505.1_ASM75650v1
Hymenobacter sp. DG25B	1385664	FCB group	Bacteroidetes/Chlorobi group	57.5145	Complete Genome	ftp://ftp.ncbi.nlm.nih.gov/genomes/all/GCA/000/801/315/GCA_000801315.1_ASM80131v1
Myroides sp. A21	1583100	FCB group	Bacteroidetes/Chlorobi group	34.1	Complete Genome	ftp://ftp.ncbi.nlm.nih.gov/genomes/all/GCA/000/807/225/GCA_000807225.1_ASM80722v1
Winogradskyella sp. PG-2	754409	FCB group	Bacteroidetes/Chlorobi group	32.2	Complete Genome	ftp://ftp.ncbi.nlm.nih.gov/genomes/all/GCA/000/828/715/GCA_000828715.1_ASM82871v1
Candidatus Sulcia muelleri PSPU	1189303	FCB group	Bacteroidetes/Chlorobi group	20.9	Complete Genome	ftp://ftp.ncbi.nlm.nih.gov/genomes/all/GCA/000/829/155/GCA_000829155.1_ASM82915v1
Chryseobacterium sp. StRB126	878220	FCB group	Bacteroidetes/Chlorobi group	35.6	Complete Genome	ftp://ftp.ncbi.nlm.nih.gov/genomes/all/GCA/000/829/375/GCA_000829375.1_ASM82937v1
Myroides profundi	480520	FCB group	Bacteroidetes/Chlorobi group	33.8	Complete Genome	ftp://ftp.ncbi.nlm.nih.gov/genomes/all/GCA/000/833/025/GCA_000833025.1_ASM83302v1
Siansivirga zeaxanthinifaciens CC-SAMT-1	1454006	FCB group	Bacteroidetes/Chlorobi group	33.5	Complete Genome	ftp://ftp.ncbi.nlm.nih.gov/genomes/all/GCA/000/941/055/GCA_000941055.1_ASM94105v1
Fermentimonas caenicola	1562970	FCB group	Bacteroidetes/Chlorobi group	37.3	Complete Genome	ftp://ftp.ncbi.nlm.nih.gov/genomes/all/GCA/000/953/535/GCA_000953535.1_E5B
Muricauda lutaonensis	516051	FCB group	Bacteroidetes/Chlorobi group	45	Complete Genome	ftp://ftp.ncbi.nlm.nih.gov/genomes/all/GCA/000/963/865/GCA_000963865.1_ASM96386v1
Zobellia galactanivorans	63186	FCB group	Bacteroidetes/Chlorobi group	42.8	Complete Genome	ftp://ftp.ncbi.nlm.nih.gov/genomes/all/GCA/000/973/105/GCA_000973105.1_ASM97310v1
Pontibacter korlensis	400092	FCB group	Bacteroidetes/Chlorobi group	47.3	Complete Genome	ftp://ftp.ncbi.nlm.nih.gov/genomes/all/GCA/000/973/725/GCA_000973725.1_ASM97372v1
Spirosoma radiotolerans	1379870	FCB group	Bacteroidetes/Chlorobi group	49.5	Complete Genome	ftp://ftp.ncbi.nlm.nih.gov/genomes/all/GCA/000/974/425/GCA_000974425.1_ASM97442v1
Elizabethkingia anophelis FMS-007	1352940	FCB group	Bacteroidetes/Chlorobi group	35.6	Complete Genome	ftp://ftp.ncbi.nlm.nih.gov/genomes/all/GCA/001/011/675/GCA_001011675.1_ASM101167v1
Chryseobacterium gallinarum	1324352	FCB group	Bacteroidetes/Chlorobi group	37.3	Complete Genome	ftp://ftp.ncbi.nlm.nih.gov/genomes/all/GCA/001/021/975/GCA_001021975.1_ASM102197v1
Cyclobacterium amurskyense	320787	FCB group	Bacteroidetes/Chlorobi group	38.3	Complete Genome	ftp://ftp.ncbi.nlm.nih.gov/genomes/all/GCA/001/050/135/GCA_001050135.1_ASM105013v1
Riemerella anatipestifer Yb2	1455062	FCB group	Bacteroidetes/Chlorobi group	35	Complete Genome	ftp://ftp.ncbi.nlm.nih.gov/genomes/all/GCA/001/077/795/GCA_001077795.1_ASM107779v1
Rufibacter sp. DG31D	1379910	FCB group	Bacteroidetes/Chlorobi group	51.3	Complete Genome	ftp://ftp.ncbi.nlm.nih.gov/genomes/all/GCA/001/078/055/GCA_001078055.1_ASM107805v1
Prevotella fusca JCM 17724	1236517	FCB group	Bacteroidetes/Chlorobi group	44.0924	Complete Genome	ftp://ftp.ncbi.nlm.nih.gov/genomes/all/GCA/001/262/015/GCA_001262015.1_ASM126201v1
Porphyromonas gingivalis	837	FCB group	Bacteroidetes/Chlorobi group	48.3	Complete Genome	ftp://ftp.ncbi.nlm.nih.gov/genomes/all/GCA/001/263/815/GCA_001263815.1_ASM126381v1
Porphyromonas gingivalis AJW4	1403336	FCB group	Bacteroidetes/Chlorobi group	48.3	Complete Genome	ftp://ftp.ncbi.nlm.nih.gov/genomes/all/GCA/001/274/615/GCA_001274615.1_ASM127461v1
Bacteroides dorei	357276	FCB group	Bacteroidetes/Chlorobi group	42	Complete Genome	ftp://ftp.ncbi.nlm.nih.gov/genomes/all/GCA/001/274/835/GCA_001274835.1_ASM127483v1
Capnocytophaga sp. oral taxon 323	1705617	FCB group	Bacteroidetes/Chlorobi group	39.7	Complete Genome	ftp://ftp.ncbi.nlm.nih.gov/genomes/all/GCA/001/278/825/GCA_001278825.1_ASM127882v1
Hymenobacter sp. DG25A	1385663	FCB group	Bacteroidetes/Chlorobi group	57.3	Complete Genome	ftp://ftp.ncbi.nlm.nih.gov/genomes/all/GCA/001/280/305/GCA_001280305.1_ASM128030v1
Rufibacter tibetensis	512763	FCB group	Bacteroidetes/Chlorobi group	47.4097	Complete Genome	ftp://ftp.ncbi.nlm.nih.gov/genomes/all/GCA/001/310/085/GCA_001310085.1_ASM131008v1
Algibacter alginicilyticus	1736674	FCB group	Bacteroidetes/Chlorobi group	31.8	Complete Genome	ftp://ftp.ncbi.nlm.nih.gov/genomes/all/GCA/001/310/225/GCA_001310225.1_ASM131022v1
Porphyromonas gingivalis 381	1403335	FCB group	Bacteroidetes/Chlorobi group	48.4	Complete Genome	ftp://ftp.ncbi.nlm.nih.gov/genomes/all/GCA/001/314/265/GCA_001314265.1_ASM131426v1
Bacteroides thetaiotaomicron	818	FCB group	Bacteroidetes/Chlorobi group	42.7	Complete Genome	ftp://ftp.ncbi.nlm.nih.gov/genomes/all/GCA/001/314/975/GCA_001314975.1_ASM131497v1
Bacteroides ovatus	28116	FCB group	Bacteroidetes/Chlorobi group	41.9	Complete Genome	ftp://ftp.ncbi.nlm.nih.gov/genomes/all/GCA/001/314/995/GCA_001314995.1_ASM131499v1
Bacteroides cellulosilyticus	246787	FCB group	Bacteroidetes/Chlorobi group	42.7	Complete Genome	ftp://ftp.ncbi.nlm.nih.gov/genomes/all/GCA/001/318/345/GCA_001318345.1_ASM131834v1
Pedobacter sp. PACM 27299	1727164	FCB group	Bacteroidetes/Chlorobi group	40.5	Complete Genome	ftp://ftp.ncbi.nlm.nih.gov/genomes/all/GCA/001/412/655/GCA_001412655.1_ASM141265v1
Sediminicola sp. YIK13	1453352	FCB group	Bacteroidetes/Chlorobi group	39.4	Complete Genome	ftp://ftp.ncbi.nlm.nih.gov/genomes/all/GCA/001/430/825/GCA_001430825.1_ASM143082v1
Nonlabens sp. MIC269	1476901	FCB group	Bacteroidetes/Chlorobi group	35.5	Complete Genome	ftp://ftp.ncbi.nlm.nih.gov/genomes/all/GCA/001/430/865/GCA_001430865.1_ASM143086v1
Salinivirga cyanobacteriivorans	1307839	FCB group	Bacteroidetes/Chlorobi group	39	Complete Genome	ftp://ftp.ncbi.nlm.nih.gov/genomes/all/GCA/001/443/605/GCA_001443605.1_ASM144360v1
Porphyromonas gingivalis A7A1-28	1403338	FCB group	Bacteroidetes/Chlorobi group	48.6	Complete Genome	ftp://ftp.ncbi.nlm.nih.gov/genomes/all/GCA/001/444/325/GCA_001444325.1_ASM144432v1
Prevotella enoeca	76123	FCB group	Bacteroidetes/Chlorobi group	46.5	Complete Genome	ftp://ftp.ncbi.nlm.nih.gov/genomes/all/GCA/001/444/445/GCA_001444445.1_ASM144444v1
Candidatus Sulcia muelleri	336810	FCB group	Bacteroidetes/Chlorobi group	24	Complete Genome	ftp://ftp.ncbi.nlm.nih.gov/genomes/all/GCA/001/447/915/GCA_001447915.1_ASM144791v1
Chryseobacterium sp. IHB B 17019	1721091	FCB group	Bacteroidetes/Chlorobi group	35.596	Complete Genome	ftp://ftp.ncbi.nlm.nih.gov/genomes/all/GCA/001/456/155/GCA_001456155.1_ASM145615v1
Tenacibaculum dicentrarchi	669041	FCB group	Bacteroidetes/Chlorobi group	31.5	Complete Genome	ftp://ftp.ncbi.nlm.nih.gov/genomes/all/GCA/001/483/385/GCA_001483385.1_ASM148338v1
Hymenobacter sedentarius	1411621	FCB group	Bacteroidetes/Chlorobi group	61	Complete Genome	ftp://ftp.ncbi.nlm.nih.gov/genomes/all/GCA/001/507/645/GCA_001507645.1_ASM150764v1
Rhodothermaceae bacterium RA	1779382	FCB group	Bacteroidetes/Chlorobi group	68.3	Complete Genome	ftp://ftp.ncbi.nlm.nih.gov/genomes/all/GCA/001/518/995/GCA_001518995.2_ASM151899v2
Lutibacter profundi	1622118	FCB group	Bacteroidetes/Chlorobi group	29.8	Complete Genome	ftp://ftp.ncbi.nlm.nih.gov/genomes/all/GCA/001/543/325/GCA_001543325.1_ASM154332v1
Tannerella forsythia KS16	1307833	FCB group	Bacteroidetes/Chlorobi group	47.2	Complete Genome	ftp://ftp.ncbi.nlm.nih.gov/genomes/all/GCA/001/547/855/GCA_001547855.1_ASM154785v1
Tannerella forsythia 3313	1307832	FCB group	Bacteroidetes/Chlorobi group	47.1	Complete Genome	ftp://ftp.ncbi.nlm.nih.gov/genomes/all/GCA/001/547/875/GCA_001547875.1_ASM154787v1
Prevotella intermedia	28131	FCB group	Bacteroidetes/Chlorobi group	43.4322	Complete Genome	ftp://ftp.ncbi.nlm.nih.gov/genomes/all/GCA/001/548/195/GCA_001548195.1_ASM154819v1
Hymenobacter sp. PAMC 26628	1484118	FCB group	Bacteroidetes/Chlorobi group	63.0349	Complete Genome	ftp://ftp.ncbi.nlm.nih.gov/genomes/all/GCA/001/562/275/GCA_001562275.1_ASM156227v1
Rufibacter sp. DG15C	1379909	FCB group	Bacteroidetes/Chlorobi group	49.2	Complete Genome	ftp://ftp.ncbi.nlm.nih.gov/genomes/all/GCA/001/577/755/GCA_001577755.1_ASM157775v1
Pedobacter cryoconitis	188932	FCB group	Bacteroidetes/Chlorobi group	38.8	Complete Genome	ftp://ftp.ncbi.nlm.nih.gov/genomes/all/GCA/001/590/605/GCA_001590605.1_ASM159060v1
Algoriphagus sp. M8-2	1727163	FCB group	Bacteroidetes/Chlorobi group	41.4	Complete Genome	ftp://ftp.ncbi.nlm.nih.gov/genomes/all/GCA/001/593/605/GCA_001593605.1_ASM159360v1
Mucilaginibacter sp. PAMC 26640	1300914	FCB group	Bacteroidetes/Chlorobi group	43.3138	Complete Genome	ftp://ftp.ncbi.nlm.nih.gov/genomes/all/GCA/001/596/135/GCA_001596135.1_ASM159613v1
Hymenobacter sp. PAMC 26554	1484116	FCB group	Bacteroidetes/Chlorobi group	60.8976	Complete Genome	ftp://ftp.ncbi.nlm.nih.gov/genomes/all/GCA/001/596/155/GCA_001596155.1_ASM159615v1
Bacteroidetes bacterium UKL13-3	1690483	FCB group	Bacteroidetes/Chlorobi group	37.3	Complete Genome	ftp://ftp.ncbi.nlm.nih.gov/genomes/all/GCA/001/602/415/GCA_001602415.1_ASM160241v1
Bacteroides dorei CL03T12C01	997877	FCB group	Bacteroidetes/Chlorobi group	41.6	Complete Genome	ftp://ftp.ncbi.nlm.nih.gov/genomes/all/GCA/001/640/865/GCA_001640865.1_ASM164086v1
Flavobacterium columnare	996	FCB group	Bacteroidetes/Chlorobi group	31	Complete Genome	ftp://ftp.ncbi.nlm.nih.gov/genomes/all/GCA/001/641/185/GCA_001641185.1_ASM164118v1
Flavisolibacter tropicus	1492898	FCB group	Bacteroidetes/Chlorobi group	41.5	Complete Genome	ftp://ftp.ncbi.nlm.nih.gov/genomes/all/GCA/001/644/645/GCA_001644645.1_ASM164464v1
Chryseobacterium glaciei	1685010	FCB group	Bacteroidetes/Chlorobi group	34.0371	Complete Genome	ftp://ftp.ncbi.nlm.nih.gov/genomes/all/GCA/001/648/155/GCA_001648155.1_ASM164815v1
Dokdonia donghaensis DSW-1	1300343	FCB group	Bacteroidetes/Chlorobi group	38.2	Complete Genome	ftp://ftp.ncbi.nlm.nih.gov/genomes/all/GCA/001/653/755/GCA_001653755.1_ASM165375v1
Niabella ginsenosidivorans	1176587	FCB group	Bacteroidetes/Chlorobi group	44.5	Complete Genome	ftp://ftp.ncbi.nlm.nih.gov/genomes/all/GCA/001/654/455/GCA_001654455.1_ASM165445v1
Arachidicoccus sp. BS20	1850526	FCB group	Bacteroidetes/Chlorobi group	39.3	Complete Genome	ftp://ftp.ncbi.nlm.nih.gov/genomes/all/GCA/001/659/705/GCA_001659705.1_ASM165970v1
Flammeovirga sp. MY04	1191459	FCB group	Bacteroidetes/Chlorobi group	34.5615	Complete Genome	ftp://ftp.ncbi.nlm.nih.gov/genomes/all/GCA/001/682/195/GCA_001682195.1_ASM168219v1
Prosthecochloris sp. CIB 2401	1868325	FCB group	Bacteroidetes/Chlorobi group	52.1	Complete Genome	ftp://ftp.ncbi.nlm.nih.gov/genomes/all/GCA/001/687/065/GCA_001687065.1_ASM168706v1
Bacteroides caecimuris	1796613	FCB group	Bacteroidetes/Chlorobi group	42.6	Complete Genome	ftp://ftp.ncbi.nlm.nih.gov/genomes/all/GCA/001/688/725/GCA_001688725.2_ASM168872v2
Muribaculum intestinale	1796646	FCB group	Bacteroidetes/Chlorobi group	50.1	Complete Genome	ftp://ftp.ncbi.nlm.nih.gov/genomes/all/GCA/001/688/845/GCA_001688845.2_ASM168884v2
Wenyingzhuangia fucanilytica	1790137	FCB group	Bacteroidetes/Chlorobi group	31.6	Complete Genome	ftp://ftp.ncbi.nlm.nih.gov/genomes/all/GCA/001/697/185/GCA_001697185.1_ASM169718v1
Flavobacterium anhuiense	459526	FCB group	Bacteroidetes/Chlorobi group	34.3	Complete Genome	ftp://ftp.ncbi.nlm.nih.gov/genomes/all/GCA/001/705/175/GCA_001705175.1_ASM170517v1
Tannerella sp. oral taxon HOT-286	712710	FCB group	Bacteroidetes/Chlorobi group	56.5	Complete Genome	ftp://ftp.ncbi.nlm.nih.gov/genomes/all/GCA/001/717/525/GCA_001717525.2_ASM171752v2
Pedobacter steynii	430522	FCB group	Bacteroidetes/Chlorobi group	41.3	Complete Genome	ftp://ftp.ncbi.nlm.nih.gov/genomes/all/GCA/001/721/645/GCA_001721645.1_ASM172164v1
Formosa sp. Hel3_A1_48	1336795	FCB group	Bacteroidetes/Chlorobi group	36.4	Complete Genome	ftp://ftp.ncbi.nlm.nih.gov/genomes/all/GCA/001/735/715/GCA_001735715.1_ASM173571v1
Formosa sp. Hel1_33_131	1336794	FCB group	Bacteroidetes/Chlorobi group	36.6	Complete Genome	ftp://ftp.ncbi.nlm.nih.gov/genomes/all/GCA/001/735/745/GCA_001735745.1_ASM173574v1
Chlorobaculum limnaeum	274537	FCB group	Bacteroidetes/Chlorobi group	56.4	Complete Genome	ftp://ftp.ncbi.nlm.nih.gov/genomes/all/GCA/001/747/405/GCA_001747405.1_ASM174740v1
Lutibacter sp. LPB0138	1850246	FCB group	Bacteroidetes/Chlorobi group	30.4	Complete Genome	ftp://ftp.ncbi.nlm.nih.gov/genomes/all/GCA/001/761/325/GCA_001761325.1_ASM176132v1
Polaribacter vadi	1774273	FCB group	Bacteroidetes/Chlorobi group	29.6	Complete Genome	ftp://ftp.ncbi.nlm.nih.gov/genomes/all/GCA/001/761/365/GCA_001761365.1_ASM176136v1
Flavobacterium gilvum	1492737	FCB group	Bacteroidetes/Chlorobi group	35.2	Complete Genome	ftp://ftp.ncbi.nlm.nih.gov/genomes/all/GCA/001/761/465/GCA_001761465.1_ASM176146v1
Flavobacterium commune	1306519	FCB group	Bacteroidetes/Chlorobi group	34.4	Complete Genome	ftp://ftp.ncbi.nlm.nih.gov/genomes/all/GCA/001/857/965/GCA_001857965.1_ASM185796v1
Maribacter sp. 1_2014MBL_MicDiv	1644130	FCB group	Bacteroidetes/Chlorobi group	35.9	Complete Genome	ftp://ftp.ncbi.nlm.nih.gov/genomes/all/GCA/001/865/655/GCA_001865655.1_ASM186565v1
Myroides sp. ZB35	1458492	FCB group	Bacteroidetes/Chlorobi group	34.1	Complete Genome	ftp://ftp.ncbi.nlm.nih.gov/genomes/all/GCA/001/865/835/GCA_001865835.1_ASM186583v1
Flavobacteriaceae bacterium UJ101	1150389	FCB group	Bacteroidetes/Chlorobi group	30.7	Complete Genome	ftp://ftp.ncbi.nlm.nih.gov/genomes/all/GCA/001/880/285/GCA_001880285.1_ASM188028v1
Gramella salexigens	1913577	FCB group	Bacteroidetes/Chlorobi group	38.2	Complete Genome	ftp://ftp.ncbi.nlm.nih.gov/genomes/all/GCA/001/889/005/GCA_001889005.1_ASM188900v1
Tenacibaculum todarodis	1850252	FCB group	Bacteroidetes/Chlorobi group	30.7	Complete Genome	ftp://ftp.ncbi.nlm.nih.gov/genomes/all/GCA/001/889/045/GCA_001889045.1_ASM188904v1
Maribacter sp. T28	1836467	FCB group	Bacteroidetes/Chlorobi group	34.4	Complete Genome	ftp://ftp.ncbi.nlm.nih.gov/genomes/all/GCA/001/913/155/GCA_001913155.1_ASM191315v1
Salegentibacter sp. T436	1729720	FCB group	Bacteroidetes/Chlorobi group	36.9	Complete Genome	ftp://ftp.ncbi.nlm.nih.gov/genomes/all/GCA/001/932/675/GCA_001932675.1_ASM193267v1
Cellulophaga lytica	979	FCB group	Bacteroidetes/Chlorobi group	32	Complete Genome	ftp://ftp.ncbi.nlm.nih.gov/genomes/all/GCA/001/941/605/GCA_001941605.1_ASM194160v1
Gramella flava JLT2011	1229726	FCB group	Bacteroidetes/Chlorobi group	42.1	Complete Genome	ftp://ftp.ncbi.nlm.nih.gov/genomes/all/GCA/001/951/155/GCA_001951155.1_ASM195115v1
Sphingobacterium sp. B29	1933220	FCB group	Bacteroidetes/Chlorobi group	40	Complete Genome	ftp://ftp.ncbi.nlm.nih.gov/genomes/all/GCA/001/952/815/GCA_001952815.1_ASM195281v1
Prevotella intermedia ATCC 25611 = DSM 20706	1122984	FCB group	Bacteroidetes/Chlorobi group	43.4621	Complete Genome	ftp://ftp.ncbi.nlm.nih.gov/genomes/all/GCA/001/953/955/GCA_001953955.1_ASM195395v1
Winogradskyella sp. J14-2	1936080	FCB group	Bacteroidetes/Chlorobi group	34.4	Complete Genome	ftp://ftp.ncbi.nlm.nih.gov/genomes/all/GCA/001/971/725/GCA_001971725.1_ASM197172v1
Lacinutrix venerupis	1486034	FCB group	Bacteroidetes/Chlorobi group	30.6	Complete Genome	ftp://ftp.ncbi.nlm.nih.gov/genomes/all/GCA/001/971/745/GCA_001971745.1_ASM197174v1
Seonamhaeicola sp. S2-3	1936081	FCB group	Bacteroidetes/Chlorobi group	32.3	Complete Genome	ftp://ftp.ncbi.nlm.nih.gov/genomes/all/GCA/001/971/785/GCA_001971785.1_ASM197178v1
Polaribacter reichenbachii	996801	FCB group	Bacteroidetes/Chlorobi group	29.5	Complete Genome	ftp://ftp.ncbi.nlm.nih.gov/genomes/all/GCA/001/975/665/GCA_001975665.1_ASM197566v1
Spirosoma montaniterrae	1178516	FCB group	Bacteroidetes/Chlorobi group	52.7	Complete Genome	ftp://ftp.ncbi.nlm.nih.gov/genomes/all/GCA/001/988/955/GCA_001988955.1_ASM198895v1
Polaribacter sp. BM10	1529069	FCB group	Bacteroidetes/Chlorobi group	29.9	Complete Genome	ftp://ftp.ncbi.nlm.nih.gov/genomes/all/GCA/002/005/425/GCA_002005425.1_ASM200542v1
Flavobacterium sp. KBS0721	1179672	FCB group	Bacteroidetes/Chlorobi group	34.1	Complete Genome	ftp://ftp.ncbi.nlm.nih.gov/genomes/all/GCA/002/007/065/GCA_002007065.3_ASM200706v3
Elizabethkingia ursingii	1756150	FCB group	Bacteroidetes/Chlorobi group	35.7	Complete Genome	ftp://ftp.ncbi.nlm.nih.gov/genomes/all/GCA/002/022/125/GCA_002022125.1_ASM202212v1
Elizabethkingia anophelis R26	1246994	FCB group	Bacteroidetes/Chlorobi group	35.5	Complete Genome	ftp://ftp.ncbi.nlm.nih.gov/genomes/all/GCA/002/023/665/GCA_002023665.2_ASM202366v2
Fibrella sp. ES10-3-2-2	1834519	FCB group	Bacteroidetes/Chlorobi group	52.8	Complete Genome	ftp://ftp.ncbi.nlm.nih.gov/genomes/all/GCA/002/108/455/GCA_002108455.1_ASM210845v1
Prosthecochloris sp. HL-130-GSB	1974213	FCB group	Bacteroidetes/Chlorobi group	52	Complete Genome	ftp://ftp.ncbi.nlm.nih.gov/genomes/all/GCA/002/113/825/GCA_002113825.1_ASM211382v1
Nonlabens sediminis	319236	FCB group	Bacteroidetes/Chlorobi group	35.5	Complete Genome	ftp://ftp.ncbi.nlm.nih.gov/genomes/all/GCA/002/117/085/GCA_002117085.1_ASM211708v1
Sphingobacteriaceae bacterium GW460-11-11-14-LB5	1986952	FCB group	Bacteroidetes/Chlorobi group	39.2	Complete Genome	ftp://ftp.ncbi.nlm.nih.gov/genomes/all/GCA/002/151/545/GCA_002151545.1_ASM215154v1
Alkalitalea saponilacus	889453	FCB group	Bacteroidetes/Chlorobi group	39.3	Complete Genome	ftp://ftp.ncbi.nlm.nih.gov/genomes/all/GCA/002/201/795/GCA_002201795.1_ASM220179v1
Prevotella melaninogenica	28132	FCB group	Bacteroidetes/Chlorobi group	40.9866	Complete Genome	ftp://ftp.ncbi.nlm.nih.gov/genomes/all/GCA/002/208/725/GCA_002208725.2_ASM220872v2
Capnocytophaga sp. ChDC OS43	209053	FCB group	Bacteroidetes/Chlorobi group	38.2	Complete Genome	ftp://ftp.ncbi.nlm.nih.gov/genomes/all/GCA/002/209/445/GCA_002209445.1_ASM220944v1
Chryseobacterium sp. T16E-39	2015076	FCB group	Bacteroidetes/Chlorobi group	35.2	Complete Genome	ftp://ftp.ncbi.nlm.nih.gov/genomes/all/GCA/002/216/065/GCA_002216065.1_ASM221606v1
Bacteroides caccae	47678	FCB group	Bacteroidetes/Chlorobi group	41.9	Complete Genome	ftp://ftp.ncbi.nlm.nih.gov/genomes/all/GCA/002/222/615/GCA_002222615.2_ASM222261v2
Arenibacter algicola	616991	FCB group	Bacteroidetes/Chlorobi group	39.8442	Complete Genome	ftp://ftp.ncbi.nlm.nih.gov/genomes/all/GCA/002/234/495/GCA_002234495.1_ASM223449v1
Prosthecochloris sp. GSB1	281093	FCB group	Bacteroidetes/Chlorobi group	56	Complete Genome	ftp://ftp.ncbi.nlm.nih.gov/genomes/all/GCA/002/240/205/GCA_002240205.1_ASM224020v1
Candidatus Fluviicola riflensis	1798018	FCB group	Bacteroidetes/Chlorobi group	42.8	Complete Genome	ftp://ftp.ncbi.nlm.nih.gov/genomes/all/GCA/002/243/285/GCA_002243285.1_ASM224328v1
Mucilaginibacter sp. BJC16-A31	1234841	FCB group	Bacteroidetes/Chlorobi group	42.2	Complete Genome	ftp://ftp.ncbi.nlm.nih.gov/genomes/all/GCA/002/257/585/GCA_002257585.1_ASM225758v1
Parabacteroides sp. CT06	2025876	FCB group	Bacteroidetes/Chlorobi group	45.2	Complete Genome	ftp://ftp.ncbi.nlm.nih.gov/genomes/all/GCA/002/257/605/GCA_002257605.1_ASM225760v1
Maribacter cobaltidurans	1178778	FCB group	Bacteroidetes/Chlorobi group	39.7	Complete Genome	ftp://ftp.ncbi.nlm.nih.gov/genomes/all/GCA/002/269/385/GCA_002269385.1_ASM226938v1
Elizabethkingia anophelis	1117645	FCB group	Bacteroidetes/Chlorobi group	35.8	Complete Genome	ftp://ftp.ncbi.nlm.nih.gov/genomes/all/GCA/002/277/995/GCA_002277995.2_ASM227799v2
Chryseobacterium piperi	558152	FCB group	Bacteroidetes/Chlorobi group	35.3	Complete Genome	ftp://ftp.ncbi.nlm.nih.gov/genomes/all/GCA/002/285/635/GCA_002285635.2_ASM228563v2
Capnocytophaga gingivalis	1017	FCB group	Bacteroidetes/Chlorobi group	40.1	Complete Genome	ftp://ftp.ncbi.nlm.nih.gov/genomes/all/GCA/002/302/415/GCA_002302415.1_ASM230241v1
Capnocytophaga cynodegmi	28189	FCB group	Bacteroidetes/Chlorobi group	34.3	Complete Genome	ftp://ftp.ncbi.nlm.nih.gov/genomes/all/GCA/002/302/475/GCA_002302475.1_ASM230247v1
Capnocytophaga sp. H4358	1945658	FCB group	Bacteroidetes/Chlorobi group	35.8	Complete Genome	ftp://ftp.ncbi.nlm.nih.gov/genomes/all/GCA/002/302/515/GCA_002302515.1_ASM230251v1
Capnocytophaga sp. H2931	1945657	FCB group	Bacteroidetes/Chlorobi group	36	Complete Genome	ftp://ftp.ncbi.nlm.nih.gov/genomes/all/GCA/002/302/535/GCA_002302535.1_ASM230253v1
Capnocytophaga leadbetteri	327575	FCB group	Bacteroidetes/Chlorobi group	40.2	Complete Genome	ftp://ftp.ncbi.nlm.nih.gov/genomes/all/GCA/002/302/615/GCA_002302615.1_ASM230261v1
Capnocytophaga stomatis	1848904	FCB group	Bacteroidetes/Chlorobi group	35.9	Complete Genome	ftp://ftp.ncbi.nlm.nih.gov/genomes/all/GCA/002/302/635/GCA_002302635.1_ASM230263v1
Blattabacterium cuenoti BPAY	1457031	FCB group	Bacteroidetes/Chlorobi group	26.3	Complete Genome	ftp://ftp.ncbi.nlm.nih.gov/genomes/all/GCA/002/355/135/GCA_002355135.1_ASM235513v1
Mucilaginibacter gotjawali	1550579	FCB group	Bacteroidetes/Chlorobi group	43.2	Complete Genome	ftp://ftp.ncbi.nlm.nih.gov/genomes/all/GCA/002/355/435/GCA_002355435.1_ASM235543v1
Filimonas lacunae	477680	FCB group	Bacteroidetes/Chlorobi group	44	Complete Genome	ftp://ftp.ncbi.nlm.nih.gov/genomes/all/GCA/002/355/595/GCA_002355595.1_F._lacunae_YT21-2
Marinifilaceae bacterium SPP2	1717717	FCB group	Bacteroidetes/Chlorobi group	36	Complete Genome	ftp://ftp.ncbi.nlm.nih.gov/genomes/all/GCA/002/356/295/GCA_002356295.1_ASM235629v1
Petrimonas sp. IBARAKI	1978337	FCB group	Bacteroidetes/Chlorobi group	44	Complete Genome	ftp://ftp.ncbi.nlm.nih.gov/genomes/all/GCA/002/356/435/GCA_002356435.2_ASM235643v2
Ichthyobacterium seriolicida	242600	FCB group	Bacteroidetes/Chlorobi group	32.8	Complete Genome	ftp://ftp.ncbi.nlm.nih.gov/genomes/all/GCA/002/369/955/GCA_002369955.1_ASM236995v1
Chitinophaga caeni	2029983	FCB group	Bacteroidetes/Chlorobi group	42.5	Complete Genome	ftp://ftp.ncbi.nlm.nih.gov/genomes/all/GCA/002/557/795/GCA_002557795.1_ASM255779v1
Pedobacter ginsengisoli	363852	FCB group	Bacteroidetes/Chlorobi group	37.8	Complete Genome	ftp://ftp.ncbi.nlm.nih.gov/genomes/all/GCA/002/736/205/GCA_002736205.1_ASM273620v1
Spirosoma pollinicola	2057025	FCB group	Bacteroidetes/Chlorobi group	47.8	Complete Genome	ftp://ftp.ncbi.nlm.nih.gov/genomes/all/GCA/002/831/565/GCA_002831565.1_ASM283156v1
Nonlabens sp. MB-3u-79	2058134	FCB group	Bacteroidetes/Chlorobi group	37.1	Complete Genome	ftp://ftp.ncbi.nlm.nih.gov/genomes/all/GCA/002/831/625/GCA_002831625.1_ASM283162v1
Olleya sp. Bg11-27	2058135	FCB group	Bacteroidetes/Chlorobi group	32.8	Complete Genome	ftp://ftp.ncbi.nlm.nih.gov/genomes/all/GCA/002/831/645/GCA_002831645.1_ASM283164v1
Lacinutrix sp. Bg11-31	2057808	FCB group	Bacteroidetes/Chlorobi group	31.6	Complete Genome	ftp://ftp.ncbi.nlm.nih.gov/genomes/all/GCA/002/831/665/GCA_002831665.1_ASM283166v1
Polaribacter sp. ALD11	2058137	FCB group	Bacteroidetes/Chlorobi group	30.6	Complete Genome	ftp://ftp.ncbi.nlm.nih.gov/genomes/all/GCA/002/831/685/GCA_002831685.1_ASM283168v1
Prevotella jejuni	1177574	FCB group	Bacteroidetes/Chlorobi group	41.7803	Complete Genome	ftp://ftp.ncbi.nlm.nih.gov/genomes/all/GCA/002/849/795/GCA_002849795.1_ASM284979v1
Flavivirga eckloniae	1803846	FCB group	Bacteroidetes/Chlorobi group	33.9	Complete Genome	ftp://ftp.ncbi.nlm.nih.gov/genomes/all/GCA/002/886/045/GCA_002886045.1_ASM288604v1
Porphyromonas gingivalis ATCC 33277	431947	FCB group	Bacteroidetes/Chlorobi group	48.4	Complete Genome	ftp://ftp.ncbi.nlm.nih.gov/genomes/all/GCA/002/892/575/GCA_002892575.1_ASM289257v1
Tamlana sp. UJ94	2069432	FCB group	Bacteroidetes/Chlorobi group	35.2	Complete Genome	ftp://ftp.ncbi.nlm.nih.gov/genomes/all/GCA/002/893/765/GCA_002893765.1_ASM289376v1
Aureitalea sp. RR4-38	2094025	FCB group	Bacteroidetes/Chlorobi group	41.9	Complete Genome	ftp://ftp.ncbi.nlm.nih.gov/genomes/all/GCA/002/966/125/GCA_002966125.1_ASM296612v1
Bacteroides zoogleoformans	28119	FCB group	Bacteroidetes/Chlorobi group	47.5	Complete Genome	ftp://ftp.ncbi.nlm.nih.gov/genomes/all/GCA/002/998/435/GCA_002998435.1_ASM299843v1
Bacteroides heparinolyticus	28113	FCB group	Bacteroidetes/Chlorobi group	47.2	Complete Genome	ftp://ftp.ncbi.nlm.nih.gov/genomes/all/GCA/002/998/535/GCA_002998535.1_ASM299853v1
Capnocytophaga sp. oral taxon 864	1316593	FCB group	Bacteroidetes/Chlorobi group	39.4378	Complete Genome	ftp://ftp.ncbi.nlm.nih.gov/genomes/all/GCA/002/998/835/GCA_002998835.1_ASM299883v1
Capnocytophaga sp. oral taxon 878	1316596	FCB group	Bacteroidetes/Chlorobi group	37.9578	Complete Genome	ftp://ftp.ncbi.nlm.nih.gov/genomes/all/GCA/002/999/135/GCA_002999135.1_ASM299913v1
Gramella sp. SH35	2126553	FCB group	Bacteroidetes/Chlorobi group	39.7	Complete Genome	ftp://ftp.ncbi.nlm.nih.gov/genomes/all/GCA/003/024/155/GCA_003024155.1_ASM302415v1
Flavobacterium magnum	2162713	FCB group	Bacteroidetes/Chlorobi group	47	Complete Genome	ftp://ftp.ncbi.nlm.nih.gov/genomes/all/GCA/003/055/625/GCA_003055625.1_ASM305562v1
Flavobacterium faecale	1355330	FCB group	Bacteroidetes/Chlorobi group	35.2	Complete Genome	ftp://ftp.ncbi.nlm.nih.gov/genomes/all/GCA/003/076/455/GCA_003076455.1_ASM307645v1
Flavobacterium kingsejongi	1678728	FCB group	Bacteroidetes/Chlorobi group	39.8	Complete Genome	ftp://ftp.ncbi.nlm.nih.gov/genomes/all/GCA/003/076/475/GCA_003076475.1_ASM307647v1
Dokdonia sp. Dokd-P16	2173169	FCB group	Bacteroidetes/Chlorobi group	37.2	Complete Genome	ftp://ftp.ncbi.nlm.nih.gov/genomes/all/GCA/003/095/655/GCA_003095655.1_ASM309565v1
Flavobacterium album	2175091	FCB group	Bacteroidetes/Chlorobi group	44.5	Complete Genome	ftp://ftp.ncbi.nlm.nih.gov/genomes/all/GCA/003/096/035/GCA_003096035.1_ASM309603v1
Flavobacterium pallidum	2172098	FCB group	Bacteroidetes/Chlorobi group	43.7	Complete Genome	ftp://ftp.ncbi.nlm.nih.gov/genomes/all/GCA/003/097/535/GCA_003097535.1_ASM309753v1
Flavobacterium crocinum	2183896	FCB group	Bacteroidetes/Chlorobi group	34	Complete Genome	ftp://ftp.ncbi.nlm.nih.gov/genomes/all/GCA/003/122/385/GCA_003122385.1_ASM312238v1
Pseudarcicella sp. HME7025	2183547	FCB group	Bacteroidetes/Chlorobi group	37.9	Complete Genome	ftp://ftp.ncbi.nlm.nih.gov/genomes/all/GCA/003/143/535/GCA_003143535.1_ASM314353v1
Flavobacterium sediminis	2201181	FCB group	Bacteroidetes/Chlorobi group	35.2	Complete Genome	ftp://ftp.ncbi.nlm.nih.gov/genomes/all/GCA/003/148/385/GCA_003148385.1_ASM314838v1
Hymenobacter nivis	1850093	FCB group	Bacteroidetes/Chlorobi group	62.5	Complete Genome	ftp://ftp.ncbi.nlm.nih.gov/genomes/all/GCA/003/149/515/GCA_003149515.1_ASM314951v1
Candidatus Cardinium hertigii	247481	FCB group	Bacteroidetes/Chlorobi group	38.2	Complete Genome	ftp://ftp.ncbi.nlm.nih.gov/genomes/all/GCA/003/176/915/GCA_003176915.1_ASM317691v1
Blattabacterium punctulatus	164514	FCB group	Bacteroidetes/Chlorobi group	23.8	Complete Genome	ftp://ftp.ncbi.nlm.nih.gov/genomes/all/GCA/003/226/775/GCA_003226775.1_ASM322677v1
Blattabacterium sp. (Cryptocercus kyebangensis)	298656	FCB group	Bacteroidetes/Chlorobi group	25.7397	Complete Genome	ftp://ftp.ncbi.nlm.nih.gov/genomes/all/GCA/003/226/855/GCA_003226855.1_ASM322685v1
Arcticibacterium luteifluviistationis	1784714	FCB group	Bacteroidetes/Chlorobi group	37.2	Complete Genome	ftp://ftp.ncbi.nlm.nih.gov/genomes/all/GCA/003/258/705/GCA_003258705.1_ASM325870v1
Echinicola strongylocentroti	1795355	FCB group	Bacteroidetes/Chlorobi group	44.1	Complete Genome	ftp://ftp.ncbi.nlm.nih.gov/genomes/all/GCA/003/260/975/GCA_003260975.1_ASM326097v1
Flagellimonas sp. HME9304	1383885	FCB group	Bacteroidetes/Chlorobi group	38.1	Complete Genome	ftp://ftp.ncbi.nlm.nih.gov/genomes/all/GCA/003/269/425/GCA_003269425.1_ASM326942v1
Flavobacterium sp. HYN0086	2249356	FCB group	Bacteroidetes/Chlorobi group	33.9	Complete Genome	ftp://ftp.ncbi.nlm.nih.gov/genomes/all/GCA/003/312/915/GCA_003312915.1_ASM331291v1
Runella sp. HYN0085	2259595	FCB group	Bacteroidetes/Chlorobi group	44.6753	Complete Genome	ftp://ftp.ncbi.nlm.nih.gov/genomes/all/GCA/003/325/355/GCA_003325355.1_ASM332535v1
Flavobacterium arcticum	1784713	FCB group	Bacteroidetes/Chlorobi group	35	Complete Genome	ftp://ftp.ncbi.nlm.nih.gov/genomes/all/GCA/003/344/925/GCA_003344925.1_ASM334492v1
Cardinium endosymbiont of Sogatella furcifera	650378	FCB group	Bacteroidetes/Chlorobi group	39.2	Complete Genome	ftp://ftp.ncbi.nlm.nih.gov/genomes/all/GCA/003/351/905/GCA_003351905.1_ASM335190v1
Kordia sp. SMS9	2282170	FCB group	Bacteroidetes/Chlorobi group	35.6	Complete Genome	ftp://ftp.ncbi.nlm.nih.gov/genomes/all/GCA/003/352/465/GCA_003352465.1_ASM335246v1
Candidatus Cyclonatronum proteinivorum	1457365	FCB group	Bacteroidetes/Chlorobi group	51.4	Complete Genome	ftp://ftp.ncbi.nlm.nih.gov/genomes/all/GCA/003/353/065/GCA_003353065.1_ASM335306v1
Bacteroides intestinalis	329854	FCB group	Bacteroidetes/Chlorobi group	42.5	Complete Genome	ftp://ftp.ncbi.nlm.nih.gov/genomes/all/GCA/003/363/675/GCA_003363675.2_ASM336367v2
Olleya aquimaris	639310	FCB group	Bacteroidetes/Chlorobi group	31.2	Complete Genome	ftp://ftp.ncbi.nlm.nih.gov/genomes/all/GCA/003/410/315/GCA_003410315.1_ASM341031v1
Mariniflexile sp. TRM1-10	2027857	FCB group	Bacteroidetes/Chlorobi group	34.6	Complete Genome	ftp://ftp.ncbi.nlm.nih.gov/genomes/all/GCA/003/425/985/GCA_003425985.1_ASM342598v1
Flavobacteriaceae bacterium	1871037	FCB group	Bacteroidetes/Chlorobi group	30.7	Complete Genome	ftp://ftp.ncbi.nlm.nih.gov/genomes/all/GCA/003/443/635/GCA_003443635.1_ASM344363v1
Aquimarina sp. BL5	1714860	FCB group	Bacteroidetes/Chlorobi group	32.9	Complete Genome	ftp://ftp.ncbi.nlm.nih.gov/genomes/all/GCA/003/443/675/GCA_003443675.1_ASM344367v1
Aquimarina sp. AD1	1714848	FCB group	Bacteroidetes/Chlorobi group	32.1	Complete Genome	ftp://ftp.ncbi.nlm.nih.gov/genomes/all/GCA/003/443/695/GCA_003443695.1_ASM344369v1
Aquimarina sp. AD10	1714849	FCB group	Bacteroidetes/Chlorobi group	32.4	Complete Genome	ftp://ftp.ncbi.nlm.nih.gov/genomes/all/GCA/003/443/715/GCA_003443715.1_ASM344371v1
Prevotella denticola	28129	FCB group	Bacteroidetes/Chlorobi group	50.1258	Complete Genome	ftp://ftp.ncbi.nlm.nih.gov/genomes/all/GCA/003/515/045/GCA_003515045.1_ASM351504v1
Pseudoflavitalea sp. 5GH32-13	2315862	FCB group	Bacteroidetes/Chlorobi group	47.5	Complete Genome	ftp://ftp.ncbi.nlm.nih.gov/genomes/all/GCA/003/555/545/GCA_003555545.1_ASM355554v1
Blattabacterium cuenoti STAT	1457030	FCB group	Bacteroidetes/Chlorobi group	24.8	Complete Genome	ftp://ftp.ncbi.nlm.nih.gov/genomes/all/GCA/003/573/915/GCA_003573915.1_ASM357391v1
Blattabacterium punctulatus CPU2	1457032	FCB group	Bacteroidetes/Chlorobi group	24.1	Complete Genome	ftp://ftp.ncbi.nlm.nih.gov/genomes/all/GCA/003/573/935/GCA_003573935.1_ASM357393v1
Hymenobacter sp. sh-6	2319843	FCB group	Bacteroidetes/Chlorobi group	60.5301	Complete Genome	ftp://ftp.ncbi.nlm.nih.gov/genomes/all/GCA/003/574/965/GCA_003574965.1_ASM357496v1
Mucilaginibacter sp. HYN0043	2305508	FCB group	Bacteroidetes/Chlorobi group	43.9	Complete Genome	ftp://ftp.ncbi.nlm.nih.gov/genomes/all/GCA/003/576/455/GCA_003576455.2_ASM357645v2
Pontibacter actiniarum	323450	FCB group	Bacteroidetes/Chlorobi group	53.1319	Complete Genome	ftp://ftp.ncbi.nlm.nih.gov/genomes/all/GCA/003/585/765/GCA_003585765.1_ASM358576v1
Chryseolinea sp. KIS68-18	2321403	FCB group	Bacteroidetes/Chlorobi group	50.9	Complete Genome	ftp://ftp.ncbi.nlm.nih.gov/genomes/all/GCA/003/589/925/GCA_003589925.1_ASM358992v1
Arachidicoccus sp. KIS59-12	2341117	FCB group	Bacteroidetes/Chlorobi group	36.4	Complete Genome	ftp://ftp.ncbi.nlm.nih.gov/genomes/all/GCA/003/600/625/GCA_003600625.1_ASM360062v1
Flavobacterium sp. 140616W15	2478552	FCB group	Bacteroidetes/Chlorobi group	32.3	Complete Genome	ftp://ftp.ncbi.nlm.nih.gov/genomes/all/GCA/003/668/995/GCA_003668995.1_ASM366899v1
Chryseobacterium sp. 3008163	2478663	FCB group	Bacteroidetes/Chlorobi group	34.5	Complete Genome	ftp://ftp.ncbi.nlm.nih.gov/genomes/all/GCA/003/669/035/GCA_003669035.1_ASM366903v1
Euzebyella marina	1761453	FCB group	Bacteroidetes/Chlorobi group	40.2	Complete Genome	ftp://ftp.ncbi.nlm.nih.gov/genomes/all/GCA/003/687/485/GCA_003687485.1_ASM368748v1
Chryseobacterium sp. 6424	2039166	FCB group	Bacteroidetes/Chlorobi group	42.4	Complete Genome	ftp://ftp.ncbi.nlm.nih.gov/genomes/all/GCA/003/692/615/GCA_003692615.1_ASM369261v1
Runella sp. SP2	2268026	FCB group	Bacteroidetes/Chlorobi group	44.4709	Complete Genome	ftp://ftp.ncbi.nlm.nih.gov/genomes/all/GCA/003/711/225/GCA_003711225.1_ASM371122v1
Chryseobacterium arthrosphaerae	651561	FCB group	Bacteroidetes/Chlorobi group	38.2	Complete Genome	ftp://ftp.ncbi.nlm.nih.gov/genomes/all/GCA/003/812/705/GCA_003812705.1_ASM381270v1
Chryseobacterium sp. G0201	2487065	FCB group	Bacteroidetes/Chlorobi group	34.2	Complete Genome	ftp://ftp.ncbi.nlm.nih.gov/genomes/all/GCA/003/815/655/GCA_003815655.1_ASM381565v1
Chryseobacterium sp. G0186	2487064	FCB group	Bacteroidetes/Chlorobi group	35.9822	Complete Genome	ftp://ftp.ncbi.nlm.nih.gov/genomes/all/GCA/003/815/675/GCA_003815675.1_ASM381567v1
Chryseobacterium carnipullorum	1124835	FCB group	Bacteroidetes/Chlorobi group	37.1	Complete Genome	ftp://ftp.ncbi.nlm.nih.gov/genomes/all/GCA/003/815/695/GCA_003815695.1_ASM381569v1
Chryseobacterium sp. G0162	2487063	FCB group	Bacteroidetes/Chlorobi group	35.5	Complete Genome	ftp://ftp.ncbi.nlm.nih.gov/genomes/all/GCA/003/815/715/GCA_003815715.1_ASM381571v1
Chryseobacterium joostei	112234	FCB group	Bacteroidetes/Chlorobi group	35.4673	Complete Genome	ftp://ftp.ncbi.nlm.nih.gov/genomes/all/GCA/003/815/775/GCA_003815775.1_ASM381577v1
Chryseobacterium shandongense	1493872	FCB group	Bacteroidetes/Chlorobi group	36.8485	Complete Genome	ftp://ftp.ncbi.nlm.nih.gov/genomes/all/GCA/003/815/835/GCA_003815835.1_ASM381583v1
Chryseobacterium lactis	1241981	FCB group	Bacteroidetes/Chlorobi group	36.1	Complete Genome	ftp://ftp.ncbi.nlm.nih.gov/genomes/all/GCA/003/815/875/GCA_003815875.1_ASM381587v1
Chryseobacterium indoltheticum	254	FCB group	Bacteroidetes/Chlorobi group	34.3	Complete Genome	ftp://ftp.ncbi.nlm.nih.gov/genomes/all/GCA/003/815/915/GCA_003815915.1_ASM381591v1
Chryseobacterium bernardetii	1241978	FCB group	Bacteroidetes/Chlorobi group	36.3	Complete Genome	ftp://ftp.ncbi.nlm.nih.gov/genomes/all/GCA/003/815/975/GCA_003815975.1_ASM381597v1
Chryseobacterium balustinum	246	FCB group	Bacteroidetes/Chlorobi group	33.7695	Complete Genome	ftp://ftp.ncbi.nlm.nih.gov/genomes/all/GCA/003/815/995/GCA_003815995.1_ASM381599v1
Chryseobacterium haifense	421525	FCB group	Bacteroidetes/Chlorobi group	37	Complete Genome	ftp://ftp.ncbi.nlm.nih.gov/genomes/all/GCA/003/816/015/GCA_003816015.1_ASM381601v1
Chryseobacterium taklimakanense	536441	FCB group	Bacteroidetes/Chlorobi group	40.6923	Complete Genome	ftp://ftp.ncbi.nlm.nih.gov/genomes/all/GCA/003/860/485/GCA_003860485.1_ASM386048v1
Chryseobacterium sp. H3001	2487073	FCB group	Bacteroidetes/Chlorobi group	39.9	Complete Genome	ftp://ftp.ncbi.nlm.nih.gov/genomes/all/GCA/003/860/505/GCA_003860505.1_ASM386050v1
Chryseobacterium sp. F5649	2487071	FCB group	Bacteroidetes/Chlorobi group	36	Complete Genome	ftp://ftp.ncbi.nlm.nih.gov/genomes/all/GCA/003/860/525/GCA_003860525.1_ASM386052v1
Cloacibacterium normanense	237258	FCB group	Bacteroidetes/Chlorobi group	33.1	Complete Genome	ftp://ftp.ncbi.nlm.nih.gov/genomes/all/GCA/003/860/565/GCA_003860565.1_ASM386056v1
Chryseobacterium carnis	1241979	FCB group	Bacteroidetes/Chlorobi group	36.3	Complete Genome	ftp://ftp.ncbi.nlm.nih.gov/genomes/all/GCA/003/860/585/GCA_003860585.1_ASM386058v1
Chryseobacterium sp. H6466	2487072	FCB group	Bacteroidetes/Chlorobi group	36	Complete Genome	ftp://ftp.ncbi.nlm.nih.gov/genomes/all/GCA/003/860/605/GCA_003860605.1_ASM386060v1
Nonlabens sp. MJ115	2496866	FCB group	Bacteroidetes/Chlorobi group	40.7	Complete Genome	ftp://ftp.ncbi.nlm.nih.gov/genomes/all/GCA/003/966/335/GCA_003966335.1_ASM396633v1
Flammeovirga sp. L12M1	2494373	FCB group	Bacteroidetes/Chlorobi group	32.1679	Complete Genome	ftp://ftp.ncbi.nlm.nih.gov/genomes/all/GCA/003/970/675/GCA_003970675.1_ASM397067v1
Maribacter sp. MJ134	2496865	FCB group	Bacteroidetes/Chlorobi group	39.3	Complete Genome	ftp://ftp.ncbi.nlm.nih.gov/genomes/all/GCA/003/970/695/GCA_003970695.1_ASM397069v1
Butyricimonas faecalis	2093856	FCB group	Bacteroidetes/Chlorobi group	43.5262	Complete Genome	ftp://ftp.ncbi.nlm.nih.gov/genomes/all/GCA/003/991/565/GCA_003991565.1_ASM399156v1
Aequorivita sp. H23M31	2494375	FCB group	Bacteroidetes/Chlorobi group	38.2	Complete Genome	ftp://ftp.ncbi.nlm.nih.gov/genomes/all/GCA/004/022/485/GCA_004022485.1_ASM402248v1
Ornithobacterium rhinotracheale	28251	FCB group	Bacteroidetes/Chlorobi group	38.3	Complete Genome	ftp://ftp.ncbi.nlm.nih.gov/genomes/all/GCA/004/088/395/GCA_004088395.1_ASM408839v1
Muriicola sp. MMS17-SY002	2507538	FCB group	Bacteroidetes/Chlorobi group	42.4	Complete Genome	ftp://ftp.ncbi.nlm.nih.gov/genomes/all/GCA/004/139/715/GCA_004139715.1_ASM413971v1
Bacteroides sp. A1C1	2528203	FCB group	Bacteroidetes/Chlorobi group	46	Complete Genome	ftp://ftp.ncbi.nlm.nih.gov/genomes/all/GCA/004/328/515/GCA_004328515.1_ASM432851v1
Myroides odoratimimus	76832	FCB group	Bacteroidetes/Chlorobi group	34.1638	Complete Genome	ftp://ftp.ncbi.nlm.nih.gov/genomes/all/GCA/004/337/635/GCA_004337635.1_ASM433763v1
Flavobacterium sp. GS13	2547394	FCB group	Bacteroidetes/Chlorobi group	36.2	Complete Genome	ftp://ftp.ncbi.nlm.nih.gov/genomes/all/GCA/004/355/225/GCA_004355225.1_ASM435522v1
Chryseobacterium sp. NBC122	2547600	FCB group	Bacteroidetes/Chlorobi group	37.5	Complete Genome	ftp://ftp.ncbi.nlm.nih.gov/genomes/all/GCA/004/359/195/GCA_004359195.1_ASM435919v1
Sphingobacterium psychroaquaticum	561061	FCB group	Bacteroidetes/Chlorobi group	41.7	Complete Genome	ftp://ftp.ncbi.nlm.nih.gov/genomes/all/GCA/004/421/025/GCA_004421025.1_ASM442102v1
Sphingobacterium sp. CZ-2	2557994	FCB group	Bacteroidetes/Chlorobi group	40.7	Complete Genome	ftp://ftp.ncbi.nlm.nih.gov/genomes/all/GCA/004/526/235/GCA_004526235.1_ASM452623v1
Flavobacterium sp. GS03	2518177	FCB group	Bacteroidetes/Chlorobi group	36.1	Complete Genome	ftp://ftp.ncbi.nlm.nih.gov/genomes/all/GCA/004/797/125/GCA_004797125.1_ASM479712v1
Tenacibaculum maritimum	107401	FCB group	Bacteroidetes/Chlorobi group	32	Complete Genome	ftp://ftp.ncbi.nlm.nih.gov/genomes/all/GCA/004/803/875/GCA_004803875.1_ASM480387v1
Psychroserpens sp. NJDZ02	2570561	FCB group	Bacteroidetes/Chlorobi group	32.7	Complete Genome	ftp://ftp.ncbi.nlm.nih.gov/genomes/all/GCA/004/843/725/GCA_004843725.1_ASM484372v1
Fabibacter pacificus	1267423	FCB group	Bacteroidetes/Chlorobi group	36.1	Complete Genome	ftp://ftp.ncbi.nlm.nih.gov/genomes/all/GCA/005/166/025/GCA_005166025.1_ASM516602v1
Elizabethkingia sp. 2-6	2575699	FCB group	Bacteroidetes/Chlorobi group	35.9	Complete Genome	ftp://ftp.ncbi.nlm.nih.gov/genomes/all/GCA/005/234/115/GCA_005234115.1_ASM523411v1
Duncaniella sp. B8	2576606	FCB group	Bacteroidetes/Chlorobi group	50.9	Complete Genome	ftp://ftp.ncbi.nlm.nih.gov/genomes/all/GCA/005/304/985/GCA_005304985.1_ASM530498v1
Pedobacter sp. KBS0701	2578106	FCB group	Bacteroidetes/Chlorobi group	39	Complete Genome	ftp://ftp.ncbi.nlm.nih.gov/genomes/all/GCA/005/938/645/GCA_005938645.2_ASM593864v2
Flavobacteriaceae bacterium F202Z8	2583587	FCB group	Bacteroidetes/Chlorobi group	43.3	Complete Genome	ftp://ftp.ncbi.nlm.nih.gov/genomes/all/GCA/005/943/945/GCA_005943945.1_ASM594394v1
Flavobacteriaceae bacterium 10Alg115	2584122	FCB group	Bacteroidetes/Chlorobi group	32.2	Complete Genome	ftp://ftp.ncbi.nlm.nih.gov/genomes/all/GCA/006/065/315/GCA_006065315.1_ASM606531v1
Elizabethkingia sp. JS20170427COW	2583851	FCB group	Bacteroidetes/Chlorobi group	35.2	Complete Genome	ftp://ftp.ncbi.nlm.nih.gov/genomes/all/GCA/006/088/815/GCA_006088815.1_ASM608881v1
Antarcticibacterium flavum	2058175	FCB group	Bacteroidetes/Chlorobi group	40.9	Complete Genome	ftp://ftp.ncbi.nlm.nih.gov/genomes/all/GCA/006/159/205/GCA_006159205.1_ASM615920v1
Hymenobacter sp. 17J68-5	2502781	FCB group	Bacteroidetes/Chlorobi group	55.9	Complete Genome	ftp://ftp.ncbi.nlm.nih.gov/genomes/all/GCA/006/337/165/GCA_006337165.1_ASM633716v1
Riemerella anatipestifer	34085	FCB group	Bacteroidetes/Chlorobi group	35.2	Complete Genome	ftp://ftp.ncbi.nlm.nih.gov/genomes/all/GCA/006/385/095/GCA_006385095.1_ASM638509v1
Alistipes sp. 3BBH6	2585117	FCB group	Bacteroidetes/Chlorobi group	58	Complete Genome	ftp://ftp.ncbi.nlm.nih.gov/genomes/all/GCA/006/542/645/GCA_006542645.1_Aond_1.0
Alistipes sp. 5CBH24	2585118	FCB group	Bacteroidetes/Chlorobi group	58.5	Complete Genome	ftp://ftp.ncbi.nlm.nih.gov/genomes/all/GCA/006/542/665/GCA_006542665.1_Acom_1.0
Alistipes sp. 5CPEGH6	2585119	FCB group	Bacteroidetes/Chlorobi group	61.3	Complete Genome	ftp://ftp.ncbi.nlm.nih.gov/genomes/all/GCA/006/542/685/GCA_006542685.1_Adis_1.0
Alistipes sp. 5CPYCFAH4	2585754	FCB group	Bacteroidetes/Chlorobi group	58	Complete Genome	ftp://ftp.ncbi.nlm.nih.gov/genomes/all/GCA/006/542/705/GCA_006542705.1_Aond_2.0
Alistipes sp. 5NYCFAH2	2585755	FCB group	Bacteroidetes/Chlorobi group	58	Complete Genome	ftp://ftp.ncbi.nlm.nih.gov/genomes/all/GCA/006/542/725/GCA_006542725.1_Aond_3.0
Alistipes sp. 6CPBBH3	2585756	FCB group	Bacteroidetes/Chlorobi group	58.4	Complete Genome	ftp://ftp.ncbi.nlm.nih.gov/genomes/all/GCA/006/542/745/GCA_006542745.1_6CPBBH3
Bacteroides xylanisolvens	371601	FCB group	Bacteroidetes/Chlorobi group	41.8371	Complete Genome	ftp://ftp.ncbi.nlm.nih.gov/genomes/all/GCA/006/546/965/GCA_006546965.1_ASM654696v1
Echinicola sp. LN3S3	2591634	FCB group	Bacteroidetes/Chlorobi group	44	Complete Genome	ftp://ftp.ncbi.nlm.nih.gov/genomes/all/GCA/006/575/665/GCA_006575665.1_ASM657566v1
Parabacteroides distasonis	823	FCB group	Bacteroidetes/Chlorobi group	45	Complete Genome	ftp://ftp.ncbi.nlm.nih.gov/genomes/all/GCA/006/739/545/GCA_006739545.1_ASM673954v1
Bacteroides uniformis	820	FCB group	Bacteroidetes/Chlorobi group	46.2094	Complete Genome	ftp://ftp.ncbi.nlm.nih.gov/genomes/all/GCA/006/742/345/GCA_006742345.1_ASM674234v1
Spirosoma sp. KCTC 42546	2520506	FCB group	Bacteroidetes/Chlorobi group	47.4	Complete Genome	ftp://ftp.ncbi.nlm.nih.gov/genomes/all/GCA/006/965/485/GCA_006965485.1_ASM696548v1
Formosa sp. PS13	2594004	FCB group	Bacteroidetes/Chlorobi group	32.2	Complete Genome	ftp://ftp.ncbi.nlm.nih.gov/genomes/all/GCA/007/197/735/GCA_007197735.1_ASM719773v1
Chryseobacterium sp. SNU WT5	2594269	FCB group	Bacteroidetes/Chlorobi group	35.2541	Complete Genome	ftp://ftp.ncbi.nlm.nih.gov/genomes/all/GCA/007/362/475/GCA_007362475.1_ASM736247v1
Elizabethkingia bruuniana	1756149	FCB group	Bacteroidetes/Chlorobi group	35.9	Complete Genome	ftp://ftp.ncbi.nlm.nih.gov/genomes/all/GCA/007/923/145/GCA_007923145.1_ASM792314v1
Elizabethkingia meningoseptica	238	FCB group	Bacteroidetes/Chlorobi group	36.5	Complete Genome	ftp://ftp.ncbi.nlm.nih.gov/genomes/all/GCA/007/923/165/GCA_007923165.1_ASM792316v1
Pseudobacter ginsenosidimutans	661488	FCB group	Bacteroidetes/Chlorobi group	46.9	Complete Genome	ftp://ftp.ncbi.nlm.nih.gov/genomes/all/GCA/007/970/185/GCA_007970185.1_ASM797018v1
Flavisolibacter ginsenosidimutans	661481	FCB group	Bacteroidetes/Chlorobi group	46.4	Complete Genome	ftp://ftp.ncbi.nlm.nih.gov/genomes/all/GCA/007/970/805/GCA_007970805.1_ASM797080v1
Mucilaginibacter ginsenosidivorans	398053	FCB group	Bacteroidetes/Chlorobi group	45.5	Complete Genome	ftp://ftp.ncbi.nlm.nih.gov/genomes/all/GCA/007/971/025/GCA_007971025.1_ASM797102v1
Panacibacter ginsenosidivorans	1813871	FCB group	Bacteroidetes/Chlorobi group	37.9	Complete Genome	ftp://ftp.ncbi.nlm.nih.gov/genomes/all/GCA/007/971/225/GCA_007971225.1_ASM797122v1
Arachidicoccus ginsenosidivorans	496057	FCB group	Bacteroidetes/Chlorobi group	41.1	Complete Genome	ftp://ftp.ncbi.nlm.nih.gov/genomes/all/GCA/007/971/385/GCA_007971385.1_ASM797138v1
Mucilaginibacter ginsenosidivorax	862126	FCB group	Bacteroidetes/Chlorobi group	43.1	Complete Genome	ftp://ftp.ncbi.nlm.nih.gov/genomes/all/GCA/007/971/525/GCA_007971525.1_ASM797152v1
Anseongella ginsenosidimutans	496056	FCB group	Bacteroidetes/Chlorobi group	49.9	Complete Genome	ftp://ftp.ncbi.nlm.nih.gov/genomes/all/GCA/008/033/235/GCA_008033235.1_ASM803323v1
Chitinophaga sp. XS-30	2604421	FCB group	Bacteroidetes/Chlorobi group	51.5	Complete Genome	ftp://ftp.ncbi.nlm.nih.gov/genomes/all/GCA/008/086/345/GCA_008086345.1_ASM808634v1
Proteiniphilum saccharofermentans	1642647	FCB group	Bacteroidetes/Chlorobi group	43.6	Complete Genome	ftp://ftp.ncbi.nlm.nih.gov/genomes/all/GCA/900/095/135/GCA_900095135.1_M36
Bacteroides ovatus V975	1379690	FCB group	Bacteroidetes/Chlorobi group	41.9	Complete Genome	ftp://ftp.ncbi.nlm.nih.gov/genomes/all/GCA/900/095/495/GCA_900095495.1_B_ovatus_V975
Petrimonas mucosa	1642646	FCB group	Bacteroidetes/Chlorobi group	48	Complete Genome	ftp://ftp.ncbi.nlm.nih.gov/genomes/all/GCA/900/095/795/GCA_900095795.1_E5A
Tenacibaculum maritimum NCIMB 2154	1349785	FCB group	Bacteroidetes/Chlorobi group	32	Complete Genome	ftp://ftp.ncbi.nlm.nih.gov/genomes/all/GCA/900/119/795/GCA_900119795.1_MARIT_PRJEB17743
Sphingobacterium mizutaii	1010	FCB group	Bacteroidetes/Chlorobi group	39.8	Complete Genome	ftp://ftp.ncbi.nlm.nih.gov/genomes/all/GCA/900/187/125/GCA_900187125.1_50592_G01
Odoribacter splanchnicus	28118	FCB group	Bacteroidetes/Chlorobi group	43.4	Complete Genome	ftp://ftp.ncbi.nlm.nih.gov/genomes/all/GCA/900/187/175/GCA_900187175.1_51342_A02
Capnocytophaga haemolytica	45243	FCB group	Bacteroidetes/Chlorobi group	44.2	Complete Genome	ftp://ftp.ncbi.nlm.nih.gov/genomes/all/GCA/900/187/255/GCA_900187255.1_51184_F02
Tenacibaculum jejuense	584609	FCB group	Bacteroidetes/Chlorobi group	30.3	Complete Genome	ftp://ftp.ncbi.nlm.nih.gov/genomes/all/GCA/900/198/195/GCA_900198195.1_Tjejuense_V1
Porphyromonas crevioricanis	393921	FCB group	Bacteroidetes/Chlorobi group	45.4	Complete Genome	ftp://ftp.ncbi.nlm.nih.gov/genomes/all/GCA/900/476/255/GCA_900476255.1_53750_A02
Prevotella oris	28135	FCB group	Bacteroidetes/Chlorobi group	44	Complete Genome	ftp://ftp.ncbi.nlm.nih.gov/genomes/all/GCA/900/637/655/GCA_900637655.1_52295_B01
Chryseobacterium nakagawai	1241982	FCB group	Bacteroidetes/Chlorobi group	35.4	Complete Genome	ftp://ftp.ncbi.nlm.nih.gov/genomes/all/GCA/900/637/665/GCA_900637665.1_52437_G01
Weeksella virosa	1014	FCB group	Bacteroidetes/Chlorobi group	35.9	Complete Genome	ftp://ftp.ncbi.nlm.nih.gov/genomes/all/GCA/900/637/795/GCA_900637795.1_52592_H02
Chryseobacterium antarcticum	266748	FCB group	Bacteroidetes/Chlorobi group	36.1	Complete Genome	ftp://ftp.ncbi.nlm.nih.gov/genomes/all/GCA/900/637/895/GCA_900637895.1_52700_G01
Capnocytophaga sputigena	1019	FCB group	Bacteroidetes/Chlorobi group	38.7	Complete Genome	ftp://ftp.ncbi.nlm.nih.gov/genomes/all/GCA/900/638/125/GCA_900638125.1_56080_B02
Chryseobacterium jeonii	266749	FCB group	Bacteroidetes/Chlorobi group	35	Complete Genome	ftp://ftp.ncbi.nlm.nih.gov/genomes/all/GCA/900/638/245/GCA_900638245.1_56772_F02
Porphyromonas cangingivalis	36874	FCB group	Bacteroidetes/Chlorobi group	47.6	Complete Genome	ftp://ftp.ncbi.nlm.nih.gov/genomes/all/GCA/900/638/305/GCA_900638305.1_57043_C01
Capnocytophaga canimorsus	28188	FCB group	Bacteroidetes/Chlorobi group	36.1	Complete Genome	ftp://ftp.ncbi.nlm.nih.gov/genomes/all/GCA/900/638/435/GCA_900638435.1_57675_B01
Chryseobacterium gleum	250	FCB group	Bacteroidetes/Chlorobi group	35.3	Complete Genome	ftp://ftp.ncbi.nlm.nih.gov/genomes/all/GCA/900/683/625/GCA_900683625.1_56279_G01
Sphingobacterium daejeonense	371142	FCB group	Bacteroidetes/Chlorobi group	37.3	Complete Genome	ftp://ftp.ncbi.nlm.nih.gov/genomes/all/GCA/901/472/535/GCA_901472535.1_36734_G01
Sphingobacterium thalpophilum	259	FCB group	Bacteroidetes/Chlorobi group	43.6	Complete Genome	ftp://ftp.ncbi.nlm.nih.gov/genomes/all/GCA/901/482/695/GCA_901482695.1_45076_G02
Candidatus Cloacimonas acidaminovorans str. Evry	459349	FCB group	Candidatus Cloacimonetes	37.9	Complete Genome	ftp://ftp.ncbi.nlm.nih.gov/genomes/all/GCA/000/146/065/GCA_000146065.1_ASM14606v1
Fibrobacter succinogenes subsp. succinogenes S85	59374	FCB group	Fibrobacteres	48	Complete Genome	ftp://ftp.ncbi.nlm.nih.gov/genomes/all/GCA/000/146/505/GCA_000146505.1_ASM14650v1
Gemmatimonas aurantiaca T-27	379066	FCB group	Gemmatimonadetes	64.3	Complete Genome	ftp://ftp.ncbi.nlm.nih.gov/genomes/all/GCA/000/010/305/GCA_000010305.1_ASM1030v1
Gemmatirosa kalamazoonesis	861299	FCB group	Gemmatimonadetes	72.6409	Complete Genome	ftp://ftp.ncbi.nlm.nih.gov/genomes/all/GCA/000/522/985/GCA_000522985.1_ASM52298v1
Gemmatimonas phototrophica	1379270	FCB group	Gemmatimonadetes	64.4	Complete Genome	ftp://ftp.ncbi.nlm.nih.gov/genomes/all/GCA/000/695/095/GCA_000695095.2_ASM69509v2
Fusobacterium nucleatum subsp. nucleatum ATCC 25586	190304	Fusobacteria	Fusobacteriia	27.2	Complete Genome	ftp://ftp.ncbi.nlm.nih.gov/genomes/all/GCA/000/007/325/GCA_000007325.1_ASM732v1
Leptotrichia buccalis C-1013-b	523794	Fusobacteria	Fusobacteriia	29.6	Complete Genome	ftp://ftp.ncbi.nlm.nih.gov/genomes/all/GCA/000/023/905/GCA_000023905.1_ASM2390v1
Sebaldella termitidis ATCC 33386	526218	Fusobacteria	Fusobacteriia	33.4235	Complete Genome	ftp://ftp.ncbi.nlm.nih.gov/genomes/all/GCA/000/024/405/GCA_000024405.1_ASM2440v1
Streptobacillus moniliformis DSM 12112	519441	Fusobacteria	Fusobacteriia	26.2655	Complete Genome	ftp://ftp.ncbi.nlm.nih.gov/genomes/all/GCA/000/024/565/GCA_000024565.1_ASM2456v1
Fusobacterium nucleatum subsp. animalis 7_1	457405	Fusobacteria	Fusobacteriia	26.99	Complete Genome	ftp://ftp.ncbi.nlm.nih.gov/genomes/all/GCA/000/158/275/GCA_000158275.2_ASM15827v2
Fusobacterium nucleatum subsp. vincentii 3_1_36A2	469604	Fusobacteria	Fusobacteriia	27.1	Complete Genome	ftp://ftp.ncbi.nlm.nih.gov/genomes/all/GCA/000/162/235/GCA_000162235.2_ASM16223v2
Fusobacterium nucleatum subsp. vincentii 3_1_27	469602	Fusobacteria	Fusobacteriia	27.0774	Complete Genome	ftp://ftp.ncbi.nlm.nih.gov/genomes/all/GCA/000/163/915/GCA_000163915.2_ASM16391v2
Ilyobacter polytropus DSM 2926	572544	Fusobacteria	Fusobacteriia	34.3553	Complete Genome	ftp://ftp.ncbi.nlm.nih.gov/genomes/all/GCA/000/165/505/GCA_000165505.1_ASM16550v1
Fusobacterium nucleatum subsp. animalis 4_8	469607	Fusobacteria	Fusobacteriia	27.0869	Complete Genome	ftp://ftp.ncbi.nlm.nih.gov/genomes/all/GCA/000/400/875/GCA_000400875.1_ASM40087v1
Sneathia amnii	187101	Fusobacteria	Fusobacteriia	28.4	Complete Genome	ftp://ftp.ncbi.nlm.nih.gov/genomes/all/GCA/000/973/085/GCA_000973085.1_ASM97308v1
Leptotrichia sp. oral taxon 212	712357	Fusobacteria	Fusobacteriia	31.4	Complete Genome	ftp://ftp.ncbi.nlm.nih.gov/genomes/all/GCA/001/274/535/GCA_001274535.1_ASM127453v1
Fusobacterium nucleatum subsp. vincentii ChDC F8	1307427	Fusobacteria	Fusobacteriia	27.1	Complete Genome	ftp://ftp.ncbi.nlm.nih.gov/genomes/all/GCA/001/296/125/GCA_001296125.1_ASM129612v1
Fusobacterium nucleatum subsp. nucleatum ChDC F316	1307428	Fusobacteria	Fusobacteriia	27.1	Complete Genome	ftp://ftp.ncbi.nlm.nih.gov/genomes/all/GCA/001/296/165/GCA_001296165.1_ASM129616v1
Fusobacterium hwasookii ChDC F206	1307443	Fusobacteria	Fusobacteriia	27.1906	Complete Genome	ftp://ftp.ncbi.nlm.nih.gov/genomes/all/GCA/001/455/085/GCA_001455085.1_ASM145508v1
Fusobacterium hwasookii ChDC F300	1307444	Fusobacteria	Fusobacteriia	27.1017	Complete Genome	ftp://ftp.ncbi.nlm.nih.gov/genomes/all/GCA/001/455/105/GCA_001455105.1_ASM145510v1
Fusobacterium hwasookii ChDC F174	1307442	Fusobacteria	Fusobacteriia	27.1169	Complete Genome	ftp://ftp.ncbi.nlm.nih.gov/genomes/all/GCA/001/455/145/GCA_001455145.1_ASM145514v1
Fusobacterium nucleatum subsp. polymorphum	76857	Fusobacteria	Fusobacteriia	26.9878	Complete Genome	ftp://ftp.ncbi.nlm.nih.gov/genomes/all/GCA/001/457/555/GCA_001457555.1_NCTC10562
Leptotrichia sp. oral taxon 847	1785996	Fusobacteria	Fusobacteriia	29.8	Complete Genome	ftp://ftp.ncbi.nlm.nih.gov/genomes/all/GCA/001/553/645/GCA_001553645.1_ASM155364v1
Fusobacterium nucleatum subsp. animalis	76859	Fusobacteria	Fusobacteriia	27	Complete Genome	ftp://ftp.ncbi.nlm.nih.gov/genomes/all/GCA/002/211/645/GCA_002211645.1_ASM221164v1
Leptotrichia sp. oral taxon 498	712368	Fusobacteria	Fusobacteriia	29.6	Complete Genome	ftp://ftp.ncbi.nlm.nih.gov/genomes/all/GCA/002/240/055/GCA_002240055.1_ASM224005v1
Fusobacterium nucleatum subsp. vincentii	155615	Fusobacteria	Fusobacteriia	27.2	Complete Genome	ftp://ftp.ncbi.nlm.nih.gov/genomes/all/GCA/002/764/055/GCA_002764055.1_ASM276405v1
Streptobacillus moniliformis	34105	Fusobacteria	Fusobacteriia	26.2657	Complete Genome	ftp://ftp.ncbi.nlm.nih.gov/genomes/all/GCA/002/983/685/GCA_002983685.1_ASM298368v1
Fusobacterium nucleatum subsp. nucleatum	76856	Fusobacteria	Fusobacteriia	27.1	Complete Genome	ftp://ftp.ncbi.nlm.nih.gov/genomes/all/GCA/003/019/295/GCA_003019295.1_ASM301929v1
Fusobacterium mortiferum ATCC 9817	469616	Fusobacteria	Fusobacteriia	29.3	Complete Genome	ftp://ftp.ncbi.nlm.nih.gov/genomes/all/GCA/003/019/315/GCA_003019315.1_ASM301931v1
Fusobacterium varium ATCC 27725	469618	Fusobacteria	Fusobacteriia	29.323	Complete Genome	ftp://ftp.ncbi.nlm.nih.gov/genomes/all/GCA/003/019/655/GCA_003019655.1_ASM301965v1
Fusobacterium gonidiaformans ATCC 25563	469615	Fusobacteria	Fusobacteriia	32.7	Complete Genome	ftp://ftp.ncbi.nlm.nih.gov/genomes/all/GCA/003/019/695/GCA_003019695.1_ASM301969v1
Fusobacterium periodonticum	860	Fusobacteria	Fusobacteriia	28.1	Complete Genome	ftp://ftp.ncbi.nlm.nih.gov/genomes/all/GCA/003/019/755/GCA_003019755.1_ASM301975v1
Fusobacterium nucleatum subsp. nucleatum ATCC 23726	525283	Fusobacteria	Fusobacteriia	27.2	Complete Genome	ftp://ftp.ncbi.nlm.nih.gov/genomes/all/GCA/003/019/785/GCA_003019785.1_ASM301978v1
Fusobacterium necrophorum subsp. funduliforme	143387	Fusobacteria	Fusobacteriia	35.2	Complete Genome	ftp://ftp.ncbi.nlm.nih.gov/genomes/all/GCA/003/732/525/GCA_003732525.1_ASM373252v1
Fusobacterium necrophorum	859	Fusobacteria	Fusobacteriia	34	Complete Genome	ftp://ftp.ncbi.nlm.nih.gov/genomes/all/GCA/003/812/825/GCA_003812825.1_ASM381282v1
Fusobacterium necrophorum subsp. necrophorum	143388	Fusobacteria	Fusobacteriia	34	Complete Genome	ftp://ftp.ncbi.nlm.nih.gov/genomes/all/GCA/004/006/635/GCA_004006635.1_ASM400663v1
Leptotrichia trevisanii	109328	Fusobacteria	Fusobacteriia	30.6	Complete Genome	ftp://ftp.ncbi.nlm.nih.gov/genomes/all/GCA/007/990/425/GCA_007990425.1_ASM799042v1
Leptotrichia goodfellowii	157692	Fusobacteria	Fusobacteriia	31.7	Complete Genome	ftp://ftp.ncbi.nlm.nih.gov/genomes/all/GCA/007/990/505/GCA_007990505.1_ASM799050v1
Leptotrichia hofstadii	157688	Fusobacteria	Fusobacteriia	30.5901	Complete Genome	ftp://ftp.ncbi.nlm.nih.gov/genomes/all/GCA/007/990/525/GCA_007990525.1_ASM799052v1
Leptotrichia wadei	157687	Fusobacteria	Fusobacteriia	29.4069	Complete Genome	ftp://ftp.ncbi.nlm.nih.gov/genomes/all/GCA/007/990/545/GCA_007990545.1_ASM799054v1
Leptotrichia hongkongensis	554406	Fusobacteria	Fusobacteriia	29.9273	Complete Genome	ftp://ftp.ncbi.nlm.nih.gov/genomes/all/GCA/007/990/635/GCA_007990635.1_ASM799063v1
Fusobacterium ulcerans	861	Fusobacteria	Fusobacteriia	30.5	Complete Genome	ftp://ftp.ncbi.nlm.nih.gov/genomes/all/GCA/900/478/315/GCA_900478315.1_34903_E01
Fusobacterium varium	856	Fusobacteria	Fusobacteriia	29.3	Complete Genome	ftp://ftp.ncbi.nlm.nih.gov/genomes/all/GCA/900/637/705/GCA_900637705.1_52451_E01
Thermodesulfovibrio yellowstonii DSM 11347	289376	Nitrospirae	Nitrospira	34.1	Complete Genome	ftp://ftp.ncbi.nlm.nih.gov/genomes/all/GCA/000/020/985/GCA_000020985.1_ASM2098v1
Nitrospira defluvii	330214	Nitrospirae	Nitrospira	59	Complete Genome	ftp://ftp.ncbi.nlm.nih.gov/genomes/all/GCA/000/196/815/GCA_000196815.1_ASM19681v1
Leptospirillum ferrooxidans C2-3	1162668	Nitrospirae	Nitrospira	50	Complete Genome	ftp://ftp.ncbi.nlm.nih.gov/genomes/all/GCA/000/284/315/GCA_000284315.1_ASM28431v1
Leptospirillum ferriphilum ML-04	1048260	Nitrospirae	Nitrospira	54.6	Complete Genome	ftp://ftp.ncbi.nlm.nih.gov/genomes/all/GCA/000/299/235/GCA_000299235.1_ASM29923v1
Leptospirillum ferriphilum YSK	1441628	Nitrospirae	Nitrospira	54.5	Complete Genome	ftp://ftp.ncbi.nlm.nih.gov/genomes/all/GCA/000/695/975/GCA_000695975.1_ASM69597v1
Leptospirillum sp. Group II 'CF-1'	1660083	Nitrospirae	Nitrospira	54.6	Complete Genome	ftp://ftp.ncbi.nlm.nih.gov/genomes/all/GCA/001/186/405/GCA_001186405.1_ASM118640v1
Nitrospira moscoviensis	42253	Nitrospirae	Nitrospira	62	Complete Genome	ftp://ftp.ncbi.nlm.nih.gov/genomes/all/GCA/001/273/775/GCA_001273775.1_ASM127377v1
Candidatus Nitrospira inopinata	1715989	Nitrospirae	Nitrospira	59.2	Complete Genome	ftp://ftp.ncbi.nlm.nih.gov/genomes/all/GCA/001/458/695/GCA_001458695.1_NiCh1
Nitrospira japonica	1325564	Nitrospirae	Nitrospira	59	Complete Genome	ftp://ftp.ncbi.nlm.nih.gov/genomes/all/GCA/900/169/565/GCA_900169565.1_NSJP_Ch1
Acidithiobacillus ferrooxidans ATCC 53993	380394	Proteobacteria	Acidithiobacillia	58.9	Complete Genome	ftp://ftp.ncbi.nlm.nih.gov/genomes/all/GCA/000/020/825/GCA_000020825.1_ASM2082v1
Acidithiobacillus ferrooxidans ATCC 23270	243159	Proteobacteria	Acidithiobacillia	58.8	Complete Genome	ftp://ftp.ncbi.nlm.nih.gov/genomes/all/GCA/000/021/485/GCA_000021485.1_ASM2148v1
Acidithiobacillus caldus ATCC 51756	637389	Proteobacteria	Acidithiobacillia	61.3938	Complete Genome	ftp://ftp.ncbi.nlm.nih.gov/genomes/all/GCA/000/175/575/GCA_000175575.2_ASM17557v2
Acidithiobacillus ferrivorans SS3	743299	Proteobacteria	Acidithiobacillia	56.6	Complete Genome	ftp://ftp.ncbi.nlm.nih.gov/genomes/all/GCA/000/214/095/GCA_000214095.3_ASM21409v3
Acidithiobacillus caldus SM-1	990288	Proteobacteria	Acidithiobacillia	60.938	Complete Genome	ftp://ftp.ncbi.nlm.nih.gov/genomes/all/GCA/000/221/025/GCA_000221025.1_ASM22102v1
Acidithiobacillus ferridurans	1232575	Proteobacteria	Acidithiobacillia	58.4	Complete Genome	ftp://ftp.ncbi.nlm.nih.gov/genomes/all/GCA/003/966/655/GCA_003966655.1_ASM396665v1
Caulobacter vibrioides CB15	190650	Proteobacteria	Alphaproteobacteria	67.2	Complete Genome	ftp://ftp.ncbi.nlm.nih.gov/genomes/all/GCA/000/006/905/GCA_000006905.1_ASM690v1
Sinorhizobium meliloti 1021	266834	Proteobacteria	Alphaproteobacteria	62.1591	Complete Genome	ftp://ftp.ncbi.nlm.nih.gov/genomes/all/GCA/000/006/965/GCA_000006965.1_ASM696v1
Rickettsia conorii str. Malish 7	272944	Proteobacteria	Alphaproteobacteria	32.4	Complete Genome	ftp://ftp.ncbi.nlm.nih.gov/genomes/all/GCA/000/007/025/GCA_000007025.1_ASM702v1
Wolbachia endosymbiont of Drosophila melanogaster	163164	Proteobacteria	Alphaproteobacteria	35.2	Complete Genome	ftp://ftp.ncbi.nlm.nih.gov/genomes/all/GCA/000/008/025/GCA_000008025.1_ASM802v1
Rickettsia typhi str. Wilmington	257363	Proteobacteria	Alphaproteobacteria	28.9	Complete Genome	ftp://ftp.ncbi.nlm.nih.gov/genomes/all/GCA/000/008/045/GCA_000008045.1_ASM804v1
Brucella abortus bv. 1 str. 9-941	262698	Proteobacteria	Alphaproteobacteria	57.2354	Complete Genome	ftp://ftp.ncbi.nlm.nih.gov/genomes/all/GCA/000/008/145/GCA_000008145.1_ASM814v1
Wolbachia endosymbiont strain TRS of Brugia malayi	292805	Proteobacteria	Alphaproteobacteria	34.2	Complete Genome	ftp://ftp.ncbi.nlm.nih.gov/genomes/all/GCA/000/008/385/GCA_000008385.1_ASM838v1
Rhizobium leguminosarum bv. viciae 3841	216596	Proteobacteria	Alphaproteobacteria	60.8668	Complete Genome	ftp://ftp.ncbi.nlm.nih.gov/genomes/all/GCA/000/009/265/GCA_000009265.1_ASM926v1
Mesorhizobium japonicum MAFF 303099	266835	Proteobacteria	Alphaproteobacteria	62.4657	Complete Genome	ftp://ftp.ncbi.nlm.nih.gov/genomes/all/GCA/000/009/625/GCA_000009625.1_ASM962v1
Magnetospirillum magneticum AMB-1	342108	Proteobacteria	Alphaproteobacteria	65.1	Complete Genome	ftp://ftp.ncbi.nlm.nih.gov/genomes/all/GCA/000/009/985/GCA_000009985.1_ASM998v1
Orientia tsutsugamushi str. Ikeda	334380	Proteobacteria	Alphaproteobacteria	30.5	Complete Genome	ftp://ftp.ncbi.nlm.nih.gov/genomes/all/GCA/000/010/205/GCA_000010205.1_ASM1020v1
Azorhizobium caulinodans ORS 571	438753	Proteobacteria	Alphaproteobacteria	67.3	Complete Genome	ftp://ftp.ncbi.nlm.nih.gov/genomes/all/GCA/000/010/525/GCA_000010525.1_ASM1052v1
Azospirillum sp. B510	137722	Proteobacteria	Alphaproteobacteria	67.6272	Complete Genome	ftp://ftp.ncbi.nlm.nih.gov/genomes/all/GCA/000/010/725/GCA_000010725.1_ASM1072v1
Acetobacter pasteurianus IFO 3283-01	634452	Proteobacteria	Alphaproteobacteria	53.0701	Complete Genome	ftp://ftp.ncbi.nlm.nih.gov/genomes/all/GCA/000/010/825/GCA_000010825.1_ASM1082v1
Acetobacter pasteurianus IFO 3283-03	634453	Proteobacteria	Alphaproteobacteria	53.07	Complete Genome	ftp://ftp.ncbi.nlm.nih.gov/genomes/all/GCA/000/010/845/GCA_000010845.1_ASM1084v1
Acetobacter pasteurianus IFO 3283-07	634454	Proteobacteria	Alphaproteobacteria	53.0701	Complete Genome	ftp://ftp.ncbi.nlm.nih.gov/genomes/all/GCA/000/010/865/GCA_000010865.1_ASM1086v1
Acetobacter pasteurianus IFO 3283-22	634455	Proteobacteria	Alphaproteobacteria	53.07	Complete Genome	ftp://ftp.ncbi.nlm.nih.gov/genomes/all/GCA/000/010/885/GCA_000010885.1_ASM1088v1
Acetobacter pasteurianus IFO 3283-26	634456	Proteobacteria	Alphaproteobacteria	53.07	Complete Genome	ftp://ftp.ncbi.nlm.nih.gov/genomes/all/GCA/000/010/905/GCA_000010905.1_ASM1090v1
Acetobacter pasteurianus IFO 3283-32	634457	Proteobacteria	Alphaproteobacteria	53.0701	Complete Genome	ftp://ftp.ncbi.nlm.nih.gov/genomes/all/GCA/000/010/925/GCA_000010925.1_ASM1092v1
Acetobacter pasteurianus IFO 3283-01-42C	634458	Proteobacteria	Alphaproteobacteria	53.1587	Complete Genome	ftp://ftp.ncbi.nlm.nih.gov/genomes/all/GCA/000/010/945/GCA_000010945.1_ASM1094v1
Acetobacter pasteurianus IFO 3283-12	634459	Proteobacteria	Alphaproteobacteria	53.0701	Complete Genome	ftp://ftp.ncbi.nlm.nih.gov/genomes/all/GCA/000/010/965/GCA_000010965.1_ASM1096v1
Anaplasma marginale str. St. Maries	234826	Proteobacteria	Alphaproteobacteria	49.8	Complete Genome	ftp://ftp.ncbi.nlm.nih.gov/genomes/all/GCA/000/011/945/GCA_000011945.1_ASM1194v1
Ruegeria pomeroyi DSS-3	246200	Proteobacteria	Alphaproteobacteria	64.0504	Complete Genome	ftp://ftp.ncbi.nlm.nih.gov/genomes/all/GCA/000/011/965/GCA_000011965.2_ASM1196v2
Rickettsia felis URRWXCal2	315456	Proteobacteria	Alphaproteobacteria	32.5609	Complete Genome	ftp://ftp.ncbi.nlm.nih.gov/genomes/all/GCA/000/012/145/GCA_000012145.1_ASM1214v1
Candidatus Pelagibacter ubique HTCC1062	335992	Proteobacteria	Alphaproteobacteria	29.7	Complete Genome	ftp://ftp.ncbi.nlm.nih.gov/genomes/all/GCA/000/012/345/GCA_000012345.1_ASM1234v1
Rickettsia bellii RML369-C	336407	Proteobacteria	Alphaproteobacteria	31.6	Complete Genome	ftp://ftp.ncbi.nlm.nih.gov/genomes/all/GCA/000/012/385/GCA_000012385.1_ASM1238v1
Ehrlichia canis str. Jake	269484	Proteobacteria	Alphaproteobacteria	29	Complete Genome	ftp://ftp.ncbi.nlm.nih.gov/genomes/all/GCA/000/012/565/GCA_000012565.1_ASM1256v1
Nitrobacter winogradskyi Nb-255	323098	Proteobacteria	Alphaproteobacteria	62	Complete Genome	ftp://ftp.ncbi.nlm.nih.gov/genomes/all/GCA/000/012/725/GCA_000012725.1_ASM1272v1
Erythrobacter litoralis HTCC2594	314225	Proteobacteria	Alphaproteobacteria	63.1	Complete Genome	ftp://ftp.ncbi.nlm.nih.gov/genomes/all/GCA/000/013/005/GCA_000013005.1_ASM1300v1
Hyphomonas neptunium ATCC 15444	228405	Proteobacteria	Alphaproteobacteria	61.9	Complete Genome	ftp://ftp.ncbi.nlm.nih.gov/genomes/all/GCA/000/013/025/GCA_000013025.1_ASM1302v1
Rhodospirillum rubrum ATCC 11170	269796	Proteobacteria	Alphaproteobacteria	65.3317	Complete Genome	ftp://ftp.ncbi.nlm.nih.gov/genomes/all/GCA/000/013/085/GCA_000013085.1_ASM1308v1
Anaplasma phagocytophilum str. HZ	212042	Proteobacteria	Alphaproteobacteria	41.6	Complete Genome	ftp://ftp.ncbi.nlm.nih.gov/genomes/all/GCA/000/013/125/GCA_000013125.1_ASM1312v1
Ehrlichia chaffeensis str. Arkansas	205920	Proteobacteria	Alphaproteobacteria	30.1	Complete Genome	ftp://ftp.ncbi.nlm.nih.gov/genomes/all/GCA/000/013/145/GCA_000013145.1_ASM1314v1
Neorickettsia sennetsu str. Miyayama	222891	Proteobacteria	Alphaproteobacteria	41.1	Complete Genome	ftp://ftp.ncbi.nlm.nih.gov/genomes/all/GCA/000/013/165/GCA_000013165.1_ASM1316v1
Novosphingobium aromaticivorans DSM 12444	279238	Proteobacteria	Alphaproteobacteria	65.1542	Complete Genome	ftp://ftp.ncbi.nlm.nih.gov/genomes/all/GCA/000/013/325/GCA_000013325.1_ASM1332v1
Rhodopseudomonas palustris HaA2	316058	Proteobacteria	Alphaproteobacteria	66	Complete Genome	ftp://ftp.ncbi.nlm.nih.gov/genomes/all/GCA/000/013/365/GCA_000013365.1_ASM1336v1
Jannaschia sp. CCS1	290400	Proteobacteria	Alphaproteobacteria	62.2121	Complete Genome	ftp://ftp.ncbi.nlm.nih.gov/genomes/all/GCA/000/013/565/GCA_000013565.1_ASM1356v1
Rhodopseudomonas palustris BisB5	316057	Proteobacteria	Alphaproteobacteria	64.8	Complete Genome	ftp://ftp.ncbi.nlm.nih.gov/genomes/all/GCA/000/013/685/GCA_000013685.1_ASM1368v1
Rhodopseudomonas palustris BisB18	316056	Proteobacteria	Alphaproteobacteria	65	Complete Genome	ftp://ftp.ncbi.nlm.nih.gov/genomes/all/GCA/000/013/745/GCA_000013745.1_ASM1374v1
Nitrobacter hamburgensis X14	323097	Proteobacteria	Alphaproteobacteria	61.6047	Complete Genome	ftp://ftp.ncbi.nlm.nih.gov/genomes/all/GCA/000/013/885/GCA_000013885.1_ASM1388v1
Sphingopyxis alaskensis RB2256	317655	Proteobacteria	Alphaproteobacteria	65.4569	Complete Genome	ftp://ftp.ncbi.nlm.nih.gov/genomes/all/GCA/000/013/985/GCA_000013985.1_ASM1398v1
Roseobacter denitrificans OCh 114	375451	Proteobacteria	Alphaproteobacteria	58.9096	Complete Genome	ftp://ftp.ncbi.nlm.nih.gov/genomes/all/GCA/000/014/045/GCA_000014045.1_ASM1404v1
Ruegeria sp. TM1040	292414	Proteobacteria	Alphaproteobacteria	60.054	Complete Genome	ftp://ftp.ncbi.nlm.nih.gov/genomes/all/GCA/000/014/065/GCA_000014065.1_ASM1406v1
Chelativorans sp. BNC1	266779	Proteobacteria	Alphaproteobacteria	61.1217	Complete Genome	ftp://ftp.ncbi.nlm.nih.gov/genomes/all/GCA/000/014/245/GCA_000014245.1_ASM1424v1
Granulibacter bethesdensis CGDNIH1	391165	Proteobacteria	Alphaproteobacteria	59.1	Complete Genome	ftp://ftp.ncbi.nlm.nih.gov/genomes/all/GCA/000/014/285/GCA_000014285.2_ASM1428v2
Rickettsia canadensis str. McKiel	293613	Proteobacteria	Alphaproteobacteria	31.1	Complete Genome	ftp://ftp.ncbi.nlm.nih.gov/genomes/all/GCA/000/014/345/GCA_000014345.1_ASM1434v1
Maricaulis maris MCS10	394221	Proteobacteria	Alphaproteobacteria	62.7	Complete Genome	ftp://ftp.ncbi.nlm.nih.gov/genomes/all/GCA/000/014/745/GCA_000014745.1_ASM1474v1
Rhodopseudomonas palustris BisA53	316055	Proteobacteria	Alphaproteobacteria	64.4	Complete Genome	ftp://ftp.ncbi.nlm.nih.gov/genomes/all/GCA/000/014/825/GCA_000014825.1_ASM1482v1
Magnetococcus marinus MC-1	156889	Proteobacteria	Alphaproteobacteria	54.2	Complete Genome	ftp://ftp.ncbi.nlm.nih.gov/genomes/all/GCA/000/014/865/GCA_000014865.1_ASM1486v1
Bradyrhizobium sp. BTAi1	288000	Proteobacteria	Alphaproteobacteria	64.7868	Complete Genome	ftp://ftp.ncbi.nlm.nih.gov/genomes/all/GCA/000/015/165/GCA_000015165.1_ASM1516v1
Bartonella bacilliformis KC583	360095	Proteobacteria	Alphaproteobacteria	38.2	Complete Genome	ftp://ftp.ncbi.nlm.nih.gov/genomes/all/GCA/000/015/445/GCA_000015445.1_ASM1544v1
Rhodobacter sphaeroides ATCC 17029	349101	Proteobacteria	Alphaproteobacteria	68.9779	Complete Genome	ftp://ftp.ncbi.nlm.nih.gov/genomes/all/GCA/000/015/985/GCA_000015985.1_ASM1598v1
Rhodospirillum centenum SW	414684	Proteobacteria	Alphaproteobacteria	70.5	Complete Genome	ftp://ftp.ncbi.nlm.nih.gov/genomes/all/GCA/000/016/185/GCA_000016185.1_ASM1618v1
Agrobacterium radiobacter K84	311403	Proteobacteria	Alphaproteobacteria	59.8671	Complete Genome	ftp://ftp.ncbi.nlm.nih.gov/genomes/all/GCA/000/016/265/GCA_000016265.1_ASM1626v1
Agrobacterium vitis S4	311402	Proteobacteria	Alphaproteobacteria	57.4965	Complete Genome	ftp://ftp.ncbi.nlm.nih.gov/genomes/all/GCA/000/016/285/GCA_000016285.1_ASM1628v1
Rhodobacter sphaeroides ATCC 17025	349102	Proteobacteria	Alphaproteobacteria	68.2478	Complete Genome	ftp://ftp.ncbi.nlm.nih.gov/genomes/all/GCA/000/016/405/GCA_000016405.1_ASM1640v1
Rickettsia massiliae MTU5	416276	Proteobacteria	Alphaproteobacteria	32.4911	Complete Genome	ftp://ftp.ncbi.nlm.nih.gov/genomes/all/GCA/000/016/625/GCA_000016625.1_ASM1662v1
Acidiphilium cryptum JF-5	349163	Proteobacteria	Alphaproteobacteria	67.0985	Complete Genome	ftp://ftp.ncbi.nlm.nih.gov/genomes/all/GCA/000/016/725/GCA_000016725.1_ASM1672v1
Sphingomonas wittichii RW1	392499	Proteobacteria	Alphaproteobacteria	67.9033	Complete Genome	ftp://ftp.ncbi.nlm.nih.gov/genomes/all/GCA/000/016/765/GCA_000016765.1_ASM1676v1
Brucella ovis ATCC 25840	444178	Proteobacteria	Alphaproteobacteria	57.2	Complete Genome	ftp://ftp.ncbi.nlm.nih.gov/genomes/all/GCA/000/016/845/GCA_000016845.1_ASM1684v1
Sinorhizobium medicae WSM419	366394	Proteobacteria	Alphaproteobacteria	61.1627	Complete Genome	ftp://ftp.ncbi.nlm.nih.gov/genomes/all/GCA/000/017/145/GCA_000017145.1_ASM1714v1
Phenylobacterium zucineum HLK1	450851	Proteobacteria	Alphaproteobacteria	71.0551	Complete Genome	ftp://ftp.ncbi.nlm.nih.gov/genomes/all/GCA/000/017/265/GCA_000017265.1_ASM1726v1
Ochrobactrum anthropi ATCC 49188	439375	Proteobacteria	Alphaproteobacteria	56.1453	Complete Genome	ftp://ftp.ncbi.nlm.nih.gov/genomes/all/GCA/000/017/405/GCA_000017405.1_ASM1740v1
Rickettsia rickettsii str. Iowa	452659	Proteobacteria	Alphaproteobacteria	32.4	Complete Genome	ftp://ftp.ncbi.nlm.nih.gov/genomes/all/GCA/000/017/445/GCA_000017445.3_ASM1744v3
Parvibaculum lavamentivorans DS-1	402881	Proteobacteria	Alphaproteobacteria	62.3	Complete Genome	ftp://ftp.ncbi.nlm.nih.gov/genomes/all/GCA/000/017/565/GCA_000017565.1_ASM1756v1
Xanthobacter autotrophicus Py2	78245	Proteobacteria	Alphaproteobacteria	67.3763	Complete Genome	ftp://ftp.ncbi.nlm.nih.gov/genomes/all/GCA/000/017/645/GCA_000017645.1_ASM1764v1
Dinoroseobacter shibae DFL 12 = DSM 16493	398580	Proteobacteria	Alphaproteobacteria	65.5105	Complete Genome	ftp://ftp.ncbi.nlm.nih.gov/genomes/all/GCA/000/018/145/GCA_000018145.1_ASM1814v1
Rickettsia akari str. Hartford	293614	Proteobacteria	Alphaproteobacteria	32.3	Complete Genome	ftp://ftp.ncbi.nlm.nih.gov/genomes/all/GCA/000/018/205/GCA_000018205.1_ASM1820v1
Rickettsia rickettsii str. 'Sheila Smith'	392021	Proteobacteria	Alphaproteobacteria	32.5	Complete Genome	ftp://ftp.ncbi.nlm.nih.gov/genomes/all/GCA/000/018/225/GCA_000018225.1_ASM1822v1
Rickettsia bellii OSU 85-389	391896	Proteobacteria	Alphaproteobacteria	31.6	Complete Genome	ftp://ftp.ncbi.nlm.nih.gov/genomes/all/GCA/000/018/245/GCA_000018245.1_ASM1824v1
Brucella canis ATCC 23365	483179	Proteobacteria	Alphaproteobacteria	57.2364	Complete Genome	ftp://ftp.ncbi.nlm.nih.gov/genomes/all/GCA/000/018/525/GCA_000018525.1_ASM1852v1
Sinorhizobium fredii NGR234	394	Proteobacteria	Alphaproteobacteria	62.4031	Complete Genome	ftp://ftp.ncbi.nlm.nih.gov/genomes/all/GCA/000/018/545/GCA_000018545.1_ASM1854v1
Brucella abortus S19	430066	Proteobacteria	Alphaproteobacteria	57.2354	Complete Genome	ftp://ftp.ncbi.nlm.nih.gov/genomes/all/GCA/000/018/725/GCA_000018725.1_ASM1872v1
Methylorubrum extorquens PA1	419610	Proteobacteria	Alphaproteobacteria	68.2	Complete Genome	ftp://ftp.ncbi.nlm.nih.gov/genomes/all/GCA/000/018/845/GCA_000018845.1_ASM1884v1
Brucella suis ATCC 23445	470137	Proteobacteria	Alphaproteobacteria	57.1843	Complete Genome	ftp://ftp.ncbi.nlm.nih.gov/genomes/all/GCA/000/018/905/GCA_000018905.1_ASM1890v1
Caulobacter sp. K31	366602	Proteobacteria	Alphaproteobacteria	67.3835	Complete Genome	ftp://ftp.ncbi.nlm.nih.gov/genomes/all/GCA/000/019/145/GCA_000019145.1_ASM1914v1
Methylobacterium sp. 4-46	426117	Proteobacteria	Alphaproteobacteria	71.5192	Complete Genome	ftp://ftp.ncbi.nlm.nih.gov/genomes/all/GCA/000/019/365/GCA_000019365.1_ASM1936v1
Methylobacterium radiotolerans JCM 2831	426355	Proteobacteria	Alphaproteobacteria	71.0375	Complete Genome	ftp://ftp.ncbi.nlm.nih.gov/genomes/all/GCA/000/019/725/GCA_000019725.1_ASM1972v1
Beijerinckia indica subsp. indica ATCC 9039	395963	Proteobacteria	Alphaproteobacteria	57.0207	Complete Genome	ftp://ftp.ncbi.nlm.nih.gov/genomes/all/GCA/000/019/845/GCA_000019845.1_ASM1984v1
Methylorubrum populi BJ001	441620	Proteobacteria	Alphaproteobacteria	69.3702	Complete Genome	ftp://ftp.ncbi.nlm.nih.gov/genomes/all/GCA/000/019/945/GCA_000019945.1_ASM1994v1
Rhizobium etli CIAT 652	491916	Proteobacteria	Alphaproteobacteria	61.3371	Complete Genome	ftp://ftp.ncbi.nlm.nih.gov/genomes/all/GCA/000/020/265/GCA_000020265.1_ASM2026v1
Anaplasma marginale str. Florida	320483	Proteobacteria	Alphaproteobacteria	49.8	Complete Genome	ftp://ftp.ncbi.nlm.nih.gov/genomes/all/GCA/000/020/305/GCA_000020305.1_ASM2030v1
Rhodopseudomonas palustris TIE-1	395960	Proteobacteria	Alphaproteobacteria	64.9	Complete Genome	ftp://ftp.ncbi.nlm.nih.gov/genomes/all/GCA/000/020/445/GCA_000020445.1_ASM2044v1
Rhodobacter sphaeroides KD131	557760	Proteobacteria	Alphaproteobacteria	69.1055	Complete Genome	ftp://ftp.ncbi.nlm.nih.gov/genomes/all/GCA/000/021/005/GCA_000021005.1_ASM2100v1
Gluconacetobacter diazotrophicus PA1 5	272568	Proteobacteria	Alphaproteobacteria	66.3446	Complete Genome	ftp://ftp.ncbi.nlm.nih.gov/genomes/all/GCA/000/021/325/GCA_000021325.1_ASM2132v1
Rhizobium leguminosarum bv. trifolii WSM2304	395492	Proteobacteria	Alphaproteobacteria	61.1684	Complete Genome	ftp://ftp.ncbi.nlm.nih.gov/genomes/all/GCA/000/021/345/GCA_000021345.1_ASM2134v1
Candidatus Hodgkinia cicadicola Dsem	573234	Proteobacteria	Alphaproteobacteria	58.4	Complete Genome	ftp://ftp.ncbi.nlm.nih.gov/genomes/all/GCA/000/021/505/GCA_000021505.1_ASM2150v1
Rickettsia peacockii str. Rustic	562019	Proteobacteria	Alphaproteobacteria	32.6422	Complete Genome	ftp://ftp.ncbi.nlm.nih.gov/genomes/all/GCA/000/021/525/GCA_000021525.1_ASM2152v1
Methylocella silvestris BL2	395965	Proteobacteria	Alphaproteobacteria	63.1	Complete Genome	ftp://ftp.ncbi.nlm.nih.gov/genomes/all/GCA/000/021/745/GCA_000021745.1_ASM2174v1
Methylorubrum extorquens CM4	440085	Proteobacteria	Alphaproteobacteria	68.0674	Complete Genome	ftp://ftp.ncbi.nlm.nih.gov/genomes/all/GCA/000/021/845/GCA_000021845.1_ASM2184v1
Rhodobacter capsulatus SB 1003	272942	Proteobacteria	Alphaproteobacteria	66.5966	Complete Genome	ftp://ftp.ncbi.nlm.nih.gov/genomes/all/GCA/000/021/865/GCA_000021865.1_ASM2186v1
Caulobacter vibrioides NA1000	565050	Proteobacteria	Alphaproteobacteria	67.2	Complete Genome	ftp://ftp.ncbi.nlm.nih.gov/genomes/all/GCA/000/022/005/GCA_000022005.1_ASM2200v1
Methylobacterium nodulans ORS 2060	460265	Proteobacteria	Alphaproteobacteria	68.485	Complete Genome	ftp://ftp.ncbi.nlm.nih.gov/genomes/all/GCA/000/022/085/GCA_000022085.1_ASM2208v1
Wolbachia sp. wRi	66084	Proteobacteria	Alphaproteobacteria	35.2	Complete Genome	ftp://ftp.ncbi.nlm.nih.gov/genomes/all/GCA/000/022/285/GCA_000022285.1_ASM2228v1
Neorickettsia risticii str. Illinois	434131	Proteobacteria	Alphaproteobacteria	41.3	Complete Genome	ftp://ftp.ncbi.nlm.nih.gov/genomes/all/GCA/000/022/525/GCA_000022525.1_ASM2252v1
Brucella melitensis ATCC 23457	546272	Proteobacteria	Alphaproteobacteria	57.2358	Complete Genome	ftp://ftp.ncbi.nlm.nih.gov/genomes/all/GCA/000/022/625/GCA_000022625.1_ASM2262v1
Bartonella grahamii as4aup	634504	Proteobacteria	Alphaproteobacteria	38.0798	Complete Genome	ftp://ftp.ncbi.nlm.nih.gov/genomes/all/GCA/000/022/725/GCA_000022725.1_ASM2272v1
Brucella microti CCM 4915	568815	Proteobacteria	Alphaproteobacteria	57.2366	Complete Genome	ftp://ftp.ncbi.nlm.nih.gov/genomes/all/GCA/000/022/745/GCA_000022745.1_ASM2274v1
Rickettsia prowazekii str. Rp22	449216	Proteobacteria	Alphaproteobacteria	29	Complete Genome	ftp://ftp.ncbi.nlm.nih.gov/genomes/all/GCA/000/022/785/GCA_000022785.1_ASM2278v1
Rickettsia africae ESF-5	347255	Proteobacteria	Alphaproteobacteria	32.4105	Complete Genome	ftp://ftp.ncbi.nlm.nih.gov/genomes/all/GCA/000/023/005/GCA_000023005.1_ASM2300v1
Rhizobium leguminosarum bv. trifolii WSM1325	395491	Proteobacteria	Alphaproteobacteria	60.7836	Complete Genome	ftp://ftp.ncbi.nlm.nih.gov/genomes/all/GCA/000/023/185/GCA_000023185.1_ASM2318v1
Candidatus Liberibacter asiaticus str. psy62	537021	Proteobacteria	Alphaproteobacteria	36.5	Complete Genome	ftp://ftp.ncbi.nlm.nih.gov/genomes/all/GCA/000/023/765/GCA_000023765.2_ASM2376v2
Hirschia baltica ATCC 49814	582402	Proteobacteria	Alphaproteobacteria	45.1594	Complete Genome	ftp://ftp.ncbi.nlm.nih.gov/genomes/all/GCA/000/023/785/GCA_000023785.1_ASM2378v1
Zymomonas mobilis subsp. mobilis NCIMB 11163	622759	Proteobacteria	Alphaproteobacteria	46.6156	Complete Genome	ftp://ftp.ncbi.nlm.nih.gov/genomes/all/GCA/000/024/245/GCA_000024245.1_ASM2424v1
Candidatus Puniceispirillum marinum IMCC1322	488538	Proteobacteria	Alphaproteobacteria	48.9	Complete Genome	ftp://ftp.ncbi.nlm.nih.gov/genomes/all/GCA/000/024/465/GCA_000024465.1_ASM2446v1
Anaplasma centrale str. Israel	574556	Proteobacteria	Alphaproteobacteria	50	Complete Genome	ftp://ftp.ncbi.nlm.nih.gov/genomes/all/GCA/000/024/505/GCA_000024505.1_ASM2450v1
Ehrlichia ruminantium str. Welgevonden	254945	Proteobacteria	Alphaproteobacteria	27.5	Complete Genome	ftp://ftp.ncbi.nlm.nih.gov/genomes/all/GCA/000/026/005/GCA_000026005.1_ASM2600v1
Bradyrhizobium sp. ORS 278	114615	Proteobacteria	Alphaproteobacteria	65.5	Complete Genome	ftp://ftp.ncbi.nlm.nih.gov/genomes/all/GCA/000/026/145/GCA_000026145.1_ASM2614v1
Bartonella quintana str. Toulouse	283165	Proteobacteria	Alphaproteobacteria	38.8	Complete Genome	ftp://ftp.ncbi.nlm.nih.gov/genomes/all/GCA/000/046/685/GCA_000046685.1_ASM4668v1
Bartonella henselae str. Houston-1	283166	Proteobacteria	Alphaproteobacteria	38.2	Complete Genome	ftp://ftp.ncbi.nlm.nih.gov/genomes/all/GCA/000/046/705/GCA_000046705.1_ASM4670v1
Ehrlichia ruminantium str. Gardel	302409	Proteobacteria	Alphaproteobacteria	27.5	Complete Genome	ftp://ftp.ncbi.nlm.nih.gov/genomes/all/GCA/000/050/405/GCA_000050405.1_ASM5040v1
Brucella abortus 2308	359391	Proteobacteria	Alphaproteobacteria	57.2353	Complete Genome	ftp://ftp.ncbi.nlm.nih.gov/genomes/all/GCA/000/054/005/GCA_000054005.1_ASM5400v1
Orientia tsutsugamushi str. Boryong	357244	Proteobacteria	Alphaproteobacteria	30.5	Complete Genome	ftp://ftp.ncbi.nlm.nih.gov/genomes/all/GCA/000/063/545/GCA_000063545.1_ASM6354v1
Methylorubrum extorquens AM1	272630	Proteobacteria	Alphaproteobacteria	68.0076	Complete Genome	ftp://ftp.ncbi.nlm.nih.gov/genomes/all/GCA/000/083/545/GCA_000083545.1_ASM8354v1
Sphingobium japonicum UT26S	452662	Proteobacteria	Alphaproteobacteria	64.8793	Complete Genome	ftp://ftp.ncbi.nlm.nih.gov/genomes/all/GCA/000/091/125/GCA_000091125.1_ASM9112v1
Agrobacterium fabrum str. C58	176299	Proteobacteria	Alphaproteobacteria	59.0606	Complete Genome	ftp://ftp.ncbi.nlm.nih.gov/genomes/all/GCA/000/092/025/GCA_000092025.1_ASM9202v1
Rhizobium etli CFN 42	347834	Proteobacteria	Alphaproteobacteria	61.0458	Complete Genome	ftp://ftp.ncbi.nlm.nih.gov/genomes/all/GCA/000/092/045/GCA_000092045.1_ASM9204v1
Caulobacter segnis ATCC 21756	509190	Proteobacteria	Alphaproteobacteria	67.7	Complete Genome	ftp://ftp.ncbi.nlm.nih.gov/genomes/all/GCA/000/092/285/GCA_000092285.1_ASM9228v1
Starkeya novella DSM 506	639283	Proteobacteria	Alphaproteobacteria	67.9	Complete Genome	ftp://ftp.ncbi.nlm.nih.gov/genomes/all/GCA/000/092/925/GCA_000092925.1_ASM9292v1
Hyphomicrobium denitrificans ATCC 51888	582899	Proteobacteria	Alphaproteobacteria	60.8	Complete Genome	ftp://ftp.ncbi.nlm.nih.gov/genomes/all/GCA/000/143/145/GCA_000143145.1_ASM14314v1
Brevundimonas subvibrioides ATCC 15264	633149	Proteobacteria	Alphaproteobacteria	68.4	Complete Genome	ftp://ftp.ncbi.nlm.nih.gov/genomes/all/GCA/000/144/605/GCA_000144605.1_ASM14460v1
Sinorhizobium meliloti BL225C	698936	Proteobacteria	Alphaproteobacteria	62.0294	Complete Genome	ftp://ftp.ncbi.nlm.nih.gov/genomes/all/GCA/000/147/775/GCA_000147775.3_ASM14777v3
Sinorhizobium meliloti AK83	693982	Proteobacteria	Alphaproteobacteria	61.9493	Complete Genome	ftp://ftp.ncbi.nlm.nih.gov/genomes/all/GCA/000/147/795/GCA_000147795.3_ASM14779v3
Sphingobium chlorophenolicum L-1	690566	Proteobacteria	Alphaproteobacteria	63.8346	Complete Genome	ftp://ftp.ncbi.nlm.nih.gov/genomes/all/GCA/000/147/835/GCA_000147835.3_ASM14783v3
Parvularcula bermudensis HTCC2503	314260	Proteobacteria	Alphaproteobacteria	60.7	Complete Genome	ftp://ftp.ncbi.nlm.nih.gov/genomes/all/GCA/000/152/825/GCA_000152825.2_ASM15282v2
Phaeobacter inhibens 2.10	383629	Proteobacteria	Alphaproteobacteria	59.8003	Complete Genome	ftp://ftp.ncbi.nlm.nih.gov/genomes/all/GCA/000/154/745/GCA_000154745.2_ASM15474v2
Phaeobacter inhibens DSM 17395	391619	Proteobacteria	Alphaproteobacteria	59.7869	Complete Genome	ftp://ftp.ncbi.nlm.nih.gov/genomes/all/GCA/000/154/765/GCA_000154765.2_ASM15476v2
Roseobacter litoralis Och 149	391595	Proteobacteria	Alphaproteobacteria	57.2249	Complete Genome	ftp://ftp.ncbi.nlm.nih.gov/genomes/all/GCA/000/154/785/GCA_000154785.2_ASM15478v2
Octadecabacter antarcticus 307	391626	Proteobacteria	Alphaproteobacteria	54.5768	Complete Genome	ftp://ftp.ncbi.nlm.nih.gov/genomes/all/GCA/000/155/675/GCA_000155675.2_ASM15567v2
Octadecabacter arcticus 238	391616	Proteobacteria	Alphaproteobacteria	55.1917	Complete Genome	ftp://ftp.ncbi.nlm.nih.gov/genomes/all/GCA/000/155/735/GCA_000155735.2_ASM15573v2
Ketogulonicigenium vulgare Y25	880591	Proteobacteria	Alphaproteobacteria	61.7422	Complete Genome	ftp://ftp.ncbi.nlm.nih.gov/genomes/all/GCA/000/164/885/GCA_000164885.1_ASM16488v1
Rhodomicrobium vannielii ATCC 17100	648757	Proteobacteria	Alphaproteobacteria	62.2	Complete Genome	ftp://ftp.ncbi.nlm.nih.gov/genomes/all/GCA/000/166/055/GCA_000166055.1_ASM16605v1
Rhizobium sp. Kim5	2020311	Proteobacteria	Alphaproteobacteria	61.1981	Complete Genome	ftp://ftp.ncbi.nlm.nih.gov/genomes/all/GCA/000/172/695/GCA_000172695.2_ASM17269v2
Rhizobium phaseoli Brasil 5	526949	Proteobacteria	Alphaproteobacteria	61.3953	Complete Genome	ftp://ftp.ncbi.nlm.nih.gov/genomes/all/GCA/000/172/715/GCA_000172715.2_ASM17271v2
Rhizobium sp. CIAT894	2020312	Proteobacteria	Alphaproteobacteria	61.1094	Complete Genome	ftp://ftp.ncbi.nlm.nih.gov/genomes/all/GCA/000/172/795/GCA_000172795.2_ASM17279v2
Asticcacaulis excentricus CB 48	573065	Proteobacteria	Alphaproteobacteria	59.5298	Complete Genome	ftp://ftp.ncbi.nlm.nih.gov/genomes/all/GCA/000/175/215/GCA_000175215.2_ASM17521v2
Zymomonas mobilis subsp. mobilis ATCC 10988	555217	Proteobacteria	Alphaproteobacteria	46.0424	Complete Genome	ftp://ftp.ncbi.nlm.nih.gov/genomes/all/GCA/000/175/255/GCA_000175255.2_ASM17525v2
Mesorhizobium opportunistum WSM2075	536019	Proteobacteria	Alphaproteobacteria	62.9	Complete Genome	ftp://ftp.ncbi.nlm.nih.gov/genomes/all/GCA/000/176/035/GCA_000176035.2_ASM17603v2
Rhodopseudomonas palustris DX-1	652103	Proteobacteria	Alphaproteobacteria	65.4	Complete Genome	ftp://ftp.ncbi.nlm.nih.gov/genomes/all/GCA/000/177/255/GCA_000177255.2_ASM17725v2
Komagataeibacter medellinensis NBRC 3288	634177	Proteobacteria	Alphaproteobacteria	60.569	Complete Genome	ftp://ftp.ncbi.nlm.nih.gov/genomes/all/GCA/000/182/745/GCA_000182745.1_ASM18274v1
Candidatus Liberibacter solanacearum CLso-ZC1	658172	Proteobacteria	Alphaproteobacteria	35.2	Complete Genome	ftp://ftp.ncbi.nlm.nih.gov/genomes/all/GCA/000/183/665/GCA_000183665.1_ASM18366v1
Mesorhizobium ciceri biovar biserrulae WSM1271	765698	Proteobacteria	Alphaproteobacteria	62.5728	Complete Genome	ftp://ftp.ncbi.nlm.nih.gov/genomes/all/GCA/000/185/905/GCA_000185905.1_ASM18590v1
Agrobacterium sp. H13-3	861208	Proteobacteria	Alphaproteobacteria	58.5333	Complete Genome	ftp://ftp.ncbi.nlm.nih.gov/genomes/all/GCA/000/192/635/GCA_000192635.1_ASM19263v1
Brucella melitensis M28	941967	Proteobacteria	Alphaproteobacteria	57.2358	Complete Genome	ftp://ftp.ncbi.nlm.nih.gov/genomes/all/GCA/000/192/725/GCA_000192725.1_ASM19272v1
Polymorphum gilvum SL003B-26A1	991905	Proteobacteria	Alphaproteobacteria	67.1174	Complete Genome	ftp://ftp.ncbi.nlm.nih.gov/genomes/all/GCA/000/192/745/GCA_000192745.1_ASM19274v1
Brucella melitensis M5-90	703352	Proteobacteria	Alphaproteobacteria	57.2358	Complete Genome	ftp://ftp.ncbi.nlm.nih.gov/genomes/all/GCA/000/192/885/GCA_000192885.1_ASM19288v1
Candidatus Pelagibacter sp. IMCC9063	1002672	Proteobacteria	Alphaproteobacteria	31.7	Complete Genome	ftp://ftp.ncbi.nlm.nih.gov/genomes/all/GCA/000/195/085/GCA_000195085.1_ASM19508v1
Rickettsia prowazekii str. Madrid E	272947	Proteobacteria	Alphaproteobacteria	29	Complete Genome	ftp://ftp.ncbi.nlm.nih.gov/genomes/all/GCA/000/195/735/GCA_000195735.1_ASM19573v1
Rhodopseudomonas palustris CGA009	258594	Proteobacteria	Alphaproteobacteria	64.9929	Complete Genome	ftp://ftp.ncbi.nlm.nih.gov/genomes/all/GCA/000/195/775/GCA_000195775.1_ASM19577v1
Bartonella tribocorum CIP 105476	382640	Proteobacteria	Alphaproteobacteria	38.8655	Complete Genome	ftp://ftp.ncbi.nlm.nih.gov/genomes/all/GCA/000/196/435/GCA_000196435.1_ASM19643v1
Acidiphilium multivorum AIU301	926570	Proteobacteria	Alphaproteobacteria	66.9853	Complete Genome	ftp://ftp.ncbi.nlm.nih.gov/genomes/all/GCA/000/202/835/GCA_000202835.1_ASM20283v1
Paracoccus denitrificans PD1222	318586	Proteobacteria	Alphaproteobacteria	66.783	Complete Genome	ftp://ftp.ncbi.nlm.nih.gov/genomes/all/GCA/000/203/895/GCA_000203895.1_ASM20389v1
Sinorhizobium meliloti SM11	707241	Proteobacteria	Alphaproteobacteria	62.0625	Complete Genome	ftp://ftp.ncbi.nlm.nih.gov/genomes/all/GCA/000/218/265/GCA_000218265.1_ASM21826v1
Oligotropha carboxidovorans OM5	504832	Proteobacteria	Alphaproteobacteria	62.3535	Complete Genome	ftp://ftp.ncbi.nlm.nih.gov/genomes/all/GCA/000/218/565/GCA_000218565.1_ASM21856v1
Oligotropha carboxidovorans OM4	1031710	Proteobacteria	Alphaproteobacteria	62.3514	Complete Genome	ftp://ftp.ncbi.nlm.nih.gov/genomes/all/GCA/000/218/585/GCA_000218585.1_ASM21858v1
Zymomonas mobilis subsp. pomaceae ATCC 29192	579138	Proteobacteria	Alphaproteobacteria	44.0421	Complete Genome	ftp://ftp.ncbi.nlm.nih.gov/genomes/all/GCA/000/218/875/GCA_000218875.1_ASM21887v1
Candidatus Midichloria mitochondrii IricVA	696127	Proteobacteria	Alphaproteobacteria	36.6	Complete Genome	ftp://ftp.ncbi.nlm.nih.gov/genomes/all/GCA/000/219/355/GCA_000219355.1_ASM21935v1
Brucella pinnipedialis B2/94	520461	Proteobacteria	Alphaproteobacteria	57.2	Complete Genome	ftp://ftp.ncbi.nlm.nih.gov/genomes/all/GCA/000/221/005/GCA_000221005.1_ASM22100v1
Rickettsia heilongjiangensis 054	1032845	Proteobacteria	Alphaproteobacteria	32.3	Complete Genome	ftp://ftp.ncbi.nlm.nih.gov/genomes/all/GCA/000/221/205/GCA_000221205.1_ASM22120v1
Brucella suis 1330	204722	Proteobacteria	Alphaproteobacteria	57.2364	Complete Genome	ftp://ftp.ncbi.nlm.nih.gov/genomes/all/GCA/000/223/195/GCA_000223195.1_ASM22319v1
Ketogulonicigenium vulgare WSH-001	759362	Proteobacteria	Alphaproteobacteria	61.7339	Complete Genome	ftp://ftp.ncbi.nlm.nih.gov/genomes/all/GCA/000/223/375/GCA_000223375.1_ASM22337v1
Rhodospirillum rubrum F11	1036743	Proteobacteria	Alphaproteobacteria	65.4	Complete Genome	ftp://ftp.ncbi.nlm.nih.gov/genomes/all/GCA/000/225/955/GCA_000225955.1_ASM22595v1
Micavibrio aeruginosavorus ARL-13	856793	Proteobacteria	Alphaproteobacteria	54.7	Complete Genome	ftp://ftp.ncbi.nlm.nih.gov/genomes/all/GCA/000/226/315/GCA_000226315.1_ASM22631v1
Brucella melitensis NI	1029825	Proteobacteria	Alphaproteobacteria	57.2357	Complete Genome	ftp://ftp.ncbi.nlm.nih.gov/genomes/all/GCA/000/227/645/GCA_000227645.1_ASM22764v1
Pelagibacterium halotolerans B2	1082931	Proteobacteria	Alphaproteobacteria	61.3946	Complete Genome	ftp://ftp.ncbi.nlm.nih.gov/genomes/all/GCA/000/230/555/GCA_000230555.1_ASM23055v1
Hyphomicrobium denitrificans 1NES1	670307	Proteobacteria	Alphaproteobacteria	59.7	Complete Genome	ftp://ftp.ncbi.nlm.nih.gov/genomes/all/GCA/000/230/975/GCA_000230975.3_ASM23097v3
Mesorhizobium australicum WSM2073	754035	Proteobacteria	Alphaproteobacteria	62.8	Complete Genome	ftp://ftp.ncbi.nlm.nih.gov/genomes/all/GCA/000/230/995/GCA_000230995.3_ASM23099v3
Brucella suis VBI22	1112912	Proteobacteria	Alphaproteobacteria	57.2364	Complete Genome	ftp://ftp.ncbi.nlm.nih.gov/genomes/all/GCA/000/236/255/GCA_000236255.1_ASM23625v1
Rickettsia slovaca 13-B	941638	Proteobacteria	Alphaproteobacteria	32.5	Complete Genome	ftp://ftp.ncbi.nlm.nih.gov/genomes/all/GCA/000/237/845/GCA_000237845.1_ASM23784v1
Brucella abortus A13334	1104320	Proteobacteria	Alphaproteobacteria	57.2354	Complete Genome	ftp://ftp.ncbi.nlm.nih.gov/genomes/all/GCA/000/238/175/GCA_000238175.1_ASM23817v1
Brucella canis HSK A52141	1104321	Proteobacteria	Alphaproteobacteria	57.2357	Complete Genome	ftp://ftp.ncbi.nlm.nih.gov/genomes/all/GCA/000/238/195/GCA_000238195.1_ASM23819v1
Acetobacter pasteurianus NBRC 101655	1006554	Proteobacteria	Alphaproteobacteria	52.7589	Complete Genome	ftp://ftp.ncbi.nlm.nih.gov/genomes/all/GCA/000/241/585/GCA_000241585.3_ASM24158v3
Rickettsia slovaca str. D-CWPP	1105109	Proteobacteria	Alphaproteobacteria	32.5	Complete Genome	ftp://ftp.ncbi.nlm.nih.gov/genomes/all/GCA/000/252/365/GCA_000252365.1_ASM25236v1
Bartonella clarridgeiae 73	696125	Proteobacteria	Alphaproteobacteria	35.7	Complete Genome	ftp://ftp.ncbi.nlm.nih.gov/genomes/all/GCA/000/253/015/GCA_000253015.1_ASM25301v1
Novosphingobium sp. PP1Y	702113	Proteobacteria	Alphaproteobacteria	63.2525	Complete Genome	ftp://ftp.ncbi.nlm.nih.gov/genomes/all/GCA/000/253/255/GCA_000253255.1_ASM25325v1
Hyphomicrobium sp. MC1	717785	Proteobacteria	Alphaproteobacteria	59.2	Complete Genome	ftp://ftp.ncbi.nlm.nih.gov/genomes/all/GCA/000/253/295/GCA_000253295.1_ASM25329v1
Tistrella mobilis KA081020-065	1110502	Proteobacteria	Alphaproteobacteria	68.058	Complete Genome	ftp://ftp.ncbi.nlm.nih.gov/genomes/all/GCA/000/264/455/GCA_000264455.2_ASM26445v2
Sphingobium indicum B90A	861109	Proteobacteria	Alphaproteobacteria	65.0243	Complete Genome	ftp://ftp.ncbi.nlm.nih.gov/genomes/all/GCA/000/264/945/GCA_000264945.2_ASM26494v2
Rickettsia prowazekii str. Chernikova	1105094	Proteobacteria	Alphaproteobacteria	29	Complete Genome	ftp://ftp.ncbi.nlm.nih.gov/genomes/all/GCA/000/277/165/GCA_000277165.1_ASM27716v1
Rickettsia prowazekii str. Katsinyian	1105095	Proteobacteria	Alphaproteobacteria	29	Complete Genome	ftp://ftp.ncbi.nlm.nih.gov/genomes/all/GCA/000/277/185/GCA_000277185.1_ASM27718v1
Rickettsia prowazekii str. BuV67-CWPP	1105096	Proteobacteria	Alphaproteobacteria	29	Complete Genome	ftp://ftp.ncbi.nlm.nih.gov/genomes/all/GCA/000/277/205/GCA_000277205.1_ASM27720v1
Rickettsia prowazekii str. GvV257	1105098	Proteobacteria	Alphaproteobacteria	29	Complete Genome	ftp://ftp.ncbi.nlm.nih.gov/genomes/all/GCA/000/277/245/GCA_000277245.1_ASM27724v1
Rickettsia prowazekii str. RpGvF24	1105099	Proteobacteria	Alphaproteobacteria	29	Complete Genome	ftp://ftp.ncbi.nlm.nih.gov/genomes/all/GCA/000/277/265/GCA_000277265.1_ASM27726v1
Rickettsia typhi str. TH1527	1003201	Proteobacteria	Alphaproteobacteria	28.9	Complete Genome	ftp://ftp.ncbi.nlm.nih.gov/genomes/all/GCA/000/277/285/GCA_000277285.1_ASM27728v1
Rickettsia typhi str. B9991CWPP	1003202	Proteobacteria	Alphaproteobacteria	28.9	Complete Genome	ftp://ftp.ncbi.nlm.nih.gov/genomes/all/GCA/000/277/305/GCA_000277305.1_ASM27730v1
Zymomonas mobilis subsp. mobilis ATCC 29191	627344	Proteobacteria	Alphaproteobacteria	46.109	Complete Genome	ftp://ftp.ncbi.nlm.nih.gov/genomes/all/GCA/000/277/755/GCA_000277755.1_ASM27775v1
Sphingobium sp. SYK-6	627192	Proteobacteria	Alphaproteobacteria	65.5589	Complete Genome	ftp://ftp.ncbi.nlm.nih.gov/genomes/all/GCA/000/283/515/GCA_000283515.1_ASM28351v1
Rickettsia japonica YH	652620	Proteobacteria	Alphaproteobacteria	32.4	Complete Genome	ftp://ftp.ncbi.nlm.nih.gov/genomes/all/GCA/000/283/595/GCA_000283595.1_ASM28359v1
Azospirillum lipoferum 4B	862719	Proteobacteria	Alphaproteobacteria	67.6703	Complete Genome	ftp://ftp.ncbi.nlm.nih.gov/genomes/all/GCA/000/283/655/GCA_000283655.1_ASM28365v1
Rickettsia rickettsii str. Colombia	1105102	Proteobacteria	Alphaproteobacteria	32.5	Complete Genome	ftp://ftp.ncbi.nlm.nih.gov/genomes/all/GCA/000/283/775/GCA_000283775.1_ASM28377v1
Rickettsia rickettsii str. Arizona	1105105	Proteobacteria	Alphaproteobacteria	32.4	Complete Genome	ftp://ftp.ncbi.nlm.nih.gov/genomes/all/GCA/000/283/795/GCA_000283795.1_ASM28379v1
Rickettsia rickettsii str. Hino	1105100	Proteobacteria	Alphaproteobacteria	32.5	Complete Genome	ftp://ftp.ncbi.nlm.nih.gov/genomes/all/GCA/000/283/815/GCA_000283815.1_ASM28381v1
Rickettsia canadensis str. CA410	1105107	Proteobacteria	Alphaproteobacteria	31	Complete Genome	ftp://ftp.ncbi.nlm.nih.gov/genomes/all/GCA/000/283/915/GCA_000283915.1_ASM28391v1
Rickettsia rickettsii str. Hlp#2	1105101	Proteobacteria	Alphaproteobacteria	32.5	Complete Genome	ftp://ftp.ncbi.nlm.nih.gov/genomes/all/GCA/000/283/935/GCA_000283935.1_ASM28393v1
Rickettsia rickettsii str. Brazil	1105104	Proteobacteria	Alphaproteobacteria	32.5	Complete Genome	ftp://ftp.ncbi.nlm.nih.gov/genomes/all/GCA/000/283/955/GCA_000283955.1_ASM28395v1
Rickettsia philipii str. 364D	481009	Proteobacteria	Alphaproteobacteria	32.5	Complete Genome	ftp://ftp.ncbi.nlm.nih.gov/genomes/all/GCA/000/283/995/GCA_000283995.1_ASM28399v1
Rickettsia amblyommatis str. GAT-30V	1105111	Proteobacteria	Alphaproteobacteria	32.4475	Complete Genome	ftp://ftp.ncbi.nlm.nih.gov/genomes/all/GCA/000/284/055/GCA_000284055.1_ASM28405v1
Rickettsia rhipicephali str. 3-7-female6-CWPP	1105113	Proteobacteria	Alphaproteobacteria	32.3884	Complete Genome	ftp://ftp.ncbi.nlm.nih.gov/genomes/all/GCA/000/284/075/GCA_000284075.1_ASM28407v1
Rickettsia australis str. Cutlack	1105110	Proteobacteria	Alphaproteobacteria	32.3282	Complete Genome	ftp://ftp.ncbi.nlm.nih.gov/genomes/all/GCA/000/284/155/GCA_000284155.1_ASM28415v1
Rickettsia montanensis str. OSU 85-930	1105114	Proteobacteria	Alphaproteobacteria	32.6	Complete Genome	ftp://ftp.ncbi.nlm.nih.gov/genomes/all/GCA/000/284/175/GCA_000284175.1_ASM28417v1
Rickettsia parkeri str. Portsmouth	1105108	Proteobacteria	Alphaproteobacteria	32.4	Complete Genome	ftp://ftp.ncbi.nlm.nih.gov/genomes/all/GCA/000/284/195/GCA_000284195.1_ASM28419v1
Bradyrhizobium sp. S23321	335659	Proteobacteria	Alphaproteobacteria	64.3	Complete Genome	ftp://ftp.ncbi.nlm.nih.gov/genomes/all/GCA/000/284/275/GCA_000284275.1_ASM28427v1
Bradyrhizobium japonicum USDA 6	1037409	Proteobacteria	Alphaproteobacteria	63.7	Complete Genome	ftp://ftp.ncbi.nlm.nih.gov/genomes/all/GCA/000/284/375/GCA_000284375.1_ASM28437v1
Pararhodospirillum photometricum DSM 122	1150469	Proteobacteria	Alphaproteobacteria	64.7	Complete Genome	ftp://ftp.ncbi.nlm.nih.gov/genomes/all/GCA/000/284/415/GCA_000284415.2_ASM28441v2
Bartonella quintana RM-11	1225179	Proteobacteria	Alphaproteobacteria	38.8	Complete Genome	ftp://ftp.ncbi.nlm.nih.gov/genomes/all/GCA/000/294/715/GCA_000294715.1_ASM29471v1
Bradyrhizobium sp. CCGE-LA001	1223566	Proteobacteria	Alphaproteobacteria	63.6	Complete Genome	ftp://ftp.ncbi.nlm.nih.gov/genomes/all/GCA/000/296/215/GCA_000296215.2_ASM29621v2
alpha proteobacterium HIMB5	859653	Proteobacteria	Alphaproteobacteria	28.6	Complete Genome	ftp://ftp.ncbi.nlm.nih.gov/genomes/all/GCA/000/299/095/GCA_000299095.1_ASM29909v1
alpha proteobacterium HIMB59	744985	Proteobacteria	Alphaproteobacteria	32.3	Complete Genome	ftp://ftp.ncbi.nlm.nih.gov/genomes/all/GCA/000/299/115/GCA_000299115.1_ASM29911v1
Thalassospira xiamenensis M-5 = DSM 17429	1123366	Proteobacteria	Alphaproteobacteria	54.7023	Complete Genome	ftp://ftp.ncbi.nlm.nih.gov/genomes/all/GCA/000/300/235/GCA_000300235.2_ASM30023v2
Methylocystis sp. SC2	187303	Proteobacteria	Alphaproteobacteria	63.4	Complete Genome	ftp://ftp.ncbi.nlm.nih.gov/genomes/all/GCA/000/304/315/GCA_000304315.1_Msp_SC2
Sinorhizobium meliloti Rm41	1230587	Proteobacteria	Alphaproteobacteria	62.0318	Complete Genome	ftp://ftp.ncbi.nlm.nih.gov/genomes/all/GCA/000/304/415/GCA_000304415.1_RM41
Wolbachia endosymbiont of Onchocerca ochengi	100901	Proteobacteria	Alphaproteobacteria	32.1	Complete Genome	ftp://ftp.ncbi.nlm.nih.gov/genomes/all/GCA/000/306/885/GCA_000306885.1_ASM30688v1
Gluconobacter oxydans H24	1224746	Proteobacteria	Alphaproteobacteria	56.1944	Complete Genome	ftp://ftp.ncbi.nlm.nih.gov/genomes/all/GCA/000/311/765/GCA_000311765.1_ASM31176v1
Candidatus Endolissoclinum faulkneri L2	1193729	Proteobacteria	Alphaproteobacteria	34.1	Complete Genome	ftp://ftp.ncbi.nlm.nih.gov/genomes/all/GCA/000/319/385/GCA_000319385.1_ASM31938v1
Sinorhizobium meliloti GR4	1235461	Proteobacteria	Alphaproteobacteria	62.0265	Complete Genome	ftp://ftp.ncbi.nlm.nih.gov/genomes/all/GCA/000/320/385/GCA_000320385.2_ASM32038v2
Liberibacter crescens BT-1	1215343	Proteobacteria	Alphaproteobacteria	35.4	Complete Genome	ftp://ftp.ncbi.nlm.nih.gov/genomes/all/GCA/000/325/745/GCA_000325745.1_ASM32574v1
Rhizobium tropici CIAT 899	698761	Proteobacteria	Alphaproteobacteria	59.5131	Complete Genome	ftp://ftp.ncbi.nlm.nih.gov/genomes/all/GCA/000/330/885/GCA_000330885.1_ASM33088v1
Bartonella australis Aust/NH1	1094489	Proteobacteria	Alphaproteobacteria	41.8	Complete Genome	ftp://ftp.ncbi.nlm.nih.gov/genomes/all/GCA/000/341/355/GCA_000341355.1_ASM34135v1
Bartonella vinsonii subsp. berkhoffii str. Winnie	1094497	Proteobacteria	Alphaproteobacteria	38.8	Complete Genome	ftp://ftp.ncbi.nlm.nih.gov/genomes/all/GCA/000/341/385/GCA_000341385.1_ASM34138v1
Bradyrhizobium oligotrophicum S58	1245469	Proteobacteria	Alphaproteobacteria	65.1	Complete Genome	ftp://ftp.ncbi.nlm.nih.gov/genomes/all/GCA/000/344/805/GCA_000344805.1_ASM34480v1
Sinorhizobium meliloti 2011	1286640	Proteobacteria	Alphaproteobacteria	62.1598	Complete Genome	ftp://ftp.ncbi.nlm.nih.gov/genomes/all/GCA/000/346/065/GCA_000346065.1_ASM34606v1
Candidatus Liberibacter asiaticus str. gxpsy	1174529	Proteobacteria	Alphaproteobacteria	36.6	Complete Genome	ftp://ftp.ncbi.nlm.nih.gov/genomes/all/GCA/000/346/595/GCA_000346595.1_ASM34659v1
Sphingomonas sp. MM-1	745310	Proteobacteria	Alphaproteobacteria	66.6882	Complete Genome	ftp://ftp.ncbi.nlm.nih.gov/genomes/all/GCA/000/347/675/GCA_000347675.2_ASM34767v2
Micavibrio aeruginosavorus EPB	349215	Proteobacteria	Alphaproteobacteria	55	Complete Genome	ftp://ftp.ncbi.nlm.nih.gov/genomes/all/GCA/000/348/745/GCA_000348745.1_ASM34874v1
Rickettsia prowazekii str. NMRC Madrid E	1290427	Proteobacteria	Alphaproteobacteria	29	Complete Genome	ftp://ftp.ncbi.nlm.nih.gov/genomes/all/GCA/000/363/905/GCA_000363905.1_ASM36390v1
Rickettsia prowazekii str. Breinl	1290428	Proteobacteria	Alphaproteobacteria	29	Complete Genome	ftp://ftp.ncbi.nlm.nih.gov/genomes/all/GCA/000/367/405/GCA_000367405.1_ASM36740v1
Epibacterium mobile F1926	1265309	Proteobacteria	Alphaproteobacteria	58.7372	Complete Genome	ftp://ftp.ncbi.nlm.nih.gov/genomes/all/GCA/000/376/545/GCA_000376545.2_ASM37654v2
Wolbachia endosymbiont of Drosophila simulans wNo	1236908	Proteobacteria	Alphaproteobacteria	34	Complete Genome	ftp://ftp.ncbi.nlm.nih.gov/genomes/all/GCA/000/376/585/GCA_000376585.1_ASM37658v1
Wolbachia endosymbiont of Drosophila simulans wHa	1236909	Proteobacteria	Alphaproteobacteria	35.1	Complete Genome	ftp://ftp.ncbi.nlm.nih.gov/genomes/all/GCA/000/376/605/GCA_000376605.1_ASM37660v1
Anaplasma phagocytophilum str. HZ2	1184253	Proteobacteria	Alphaproteobacteria	41.6	Complete Genome	ftp://ftp.ncbi.nlm.nih.gov/genomes/all/GCA/000/439/755/GCA_000439755.1_ASM43975v1
Anaplasma phagocytophilum str. JM	1173064	Proteobacteria	Alphaproteobacteria	41.6	Complete Genome	ftp://ftp.ncbi.nlm.nih.gov/genomes/all/GCA/000/439/775/GCA_000439775.1_ASM43977v1
Rhizobium etli bv. mimosae str. Mim1	1328306	Proteobacteria	Alphaproteobacteria	60.8214	Complete Genome	ftp://ftp.ncbi.nlm.nih.gov/genomes/all/GCA/000/442/435/GCA_000442435.1_ASM44243v1
Paracoccus aminophilus JCM 7686	1367847	Proteobacteria	Alphaproteobacteria	63.4088	Complete Genome	ftp://ftp.ncbi.nlm.nih.gov/genomes/all/GCA/000/444/995/GCA_000444995.1_ASM44499v1
Candidatus Liberibacter americanus str. Sao Paulo	1261131	Proteobacteria	Alphaproteobacteria	31.1	Complete Genome	ftp://ftp.ncbi.nlm.nih.gov/genomes/all/GCA/000/496/595/GCA_000496595.1_ASM49659v1
Zymomonas mobilis subsp. mobilis str. CP4 = NRRL B-14023	627343	Proteobacteria	Alphaproteobacteria	45.9516	Complete Genome	ftp://ftp.ncbi.nlm.nih.gov/genomes/all/GCA/000/498/655/GCA_000498655.1_ASM49865v1
Rhizobium sp. IRBG74	424182	Proteobacteria	Alphaproteobacteria	59.1073	Complete Genome	ftp://ftp.ncbi.nlm.nih.gov/genomes/all/GCA/000/499/645/GCA_000499645.1_IRBG74
Rickettsia monacensis	109232	Proteobacteria	Alphaproteobacteria	32.4	Complete Genome	ftp://ftp.ncbi.nlm.nih.gov/genomes/all/GCA/000/499/665/GCA_000499665.2_RMONA_1
Hyphomicrobium nitrativorans NL23	1029756	Proteobacteria	Alphaproteobacteria	63.9	Complete Genome	ftp://ftp.ncbi.nlm.nih.gov/genomes/all/GCA/000/503/895/GCA_000503895.1_ASM50389v1
Ehrlichia muris AS145	1423892	Proteobacteria	Alphaproteobacteria	29.7	Complete Genome	ftp://ftp.ncbi.nlm.nih.gov/genomes/all/GCA/000/508/225/GCA_000508225.1_ASM50822v1
Candidatus Endolissoclinum faulkneri L5	1401328	Proteobacteria	Alphaproteobacteria	34.5	Complete Genome	ftp://ftp.ncbi.nlm.nih.gov/genomes/all/GCA/000/510/265/GCA_000510265.1_ASM51026v1
Leisingera methylohalidivorans DSM 14336	999552	Proteobacteria	Alphaproteobacteria	62.3557	Complete Genome	ftp://ftp.ncbi.nlm.nih.gov/genomes/all/GCA/000/511/355/GCA_000511355.1_ASM51135v1
Phaeobacter gallaeciensis DSM 26640	1423144	Proteobacteria	Alphaproteobacteria	59.4193	Complete Genome	ftp://ftp.ncbi.nlm.nih.gov/genomes/all/GCA/000/511/385/GCA_000511385.1_ASM51138v1
Sphingomonas sanxanigenens DSM 19645 = NX02	1123269	Proteobacteria	Alphaproteobacteria	66.6748	Complete Genome	ftp://ftp.ncbi.nlm.nih.gov/genomes/all/GCA/000/512/205/GCA_000512205.2_ASM51220v2
Magnetospirillum gryphiswaldense MSR-1 v2	1430440	Proteobacteria	Alphaproteobacteria	63.3	Complete Genome	ftp://ftp.ncbi.nlm.nih.gov/genomes/all/GCA/000/513/295/GCA_000513295.1_MGMSRv2
Rhizobium leguminosarum bv. trifolii WSM1689	754523	Proteobacteria	Alphaproteobacteria	60.9297	Complete Genome	ftp://ftp.ncbi.nlm.nih.gov/genomes/all/GCA/000/517/605/GCA_000517605.1_ASM51760v1
Rhizobium leguminosarum bv. trifolii CB782	1033991	Proteobacteria	Alphaproteobacteria	61.0123	Complete Genome	ftp://ftp.ncbi.nlm.nih.gov/genomes/all/GCA/000/520/875/GCA_000520875.1_ASM52087v1
Komagataeibacter xylinus E25	1296990	Proteobacteria	Alphaproteobacteria	62.0911	Complete Genome	ftp://ftp.ncbi.nlm.nih.gov/genomes/all/GCA/000/550/765/GCA_000550765.1_ASM55076v1
Zymomonas mobilis subsp. mobilis NRRL B-12526	1194424	Proteobacteria	Alphaproteobacteria	45.9583	Complete Genome	ftp://ftp.ncbi.nlm.nih.gov/genomes/all/GCA/000/576/125/GCA_000576125.1_ASM57612v1
Granulibacter bethesdensis CGDNIH4	1052095	Proteobacteria	Alphaproteobacteria	58.7	Complete Genome	ftp://ftp.ncbi.nlm.nih.gov/genomes/all/GCA/000/576/145/GCA_000576145.2_ASM57614v2
Granulibacter bethesdensis	364410	Proteobacteria	Alphaproteobacteria	59	Complete Genome	ftp://ftp.ncbi.nlm.nih.gov/genomes/all/GCA/000/576/185/GCA_000576185.2_ASM57618v2
Gluconobacter oxydans DSM 3504	1288313	Proteobacteria	Alphaproteobacteria	61	Complete Genome	ftp://ftp.ncbi.nlm.nih.gov/genomes/all/GCA/000/583/855/GCA_000583855.1_ASM58385v1
Brucella ceti TE10759-12	1423891	Proteobacteria	Alphaproteobacteria	57.2708	Complete Genome	ftp://ftp.ncbi.nlm.nih.gov/genomes/all/GCA/000/590/795/GCA_000590795.1_ASM59079v1
Brucella ceti TE28753-12	1407053	Proteobacteria	Alphaproteobacteria	57.1708	Complete Genome	ftp://ftp.ncbi.nlm.nih.gov/genomes/all/GCA/000/590/815/GCA_000590815.1_ASM59081v1
Candidatus Liberibacter asiaticus	34021	Proteobacteria	Alphaproteobacteria	36.4	Complete Genome	ftp://ftp.ncbi.nlm.nih.gov/genomes/all/GCA/000/590/865/GCA_000590865.2_ASM59086v2
Roseibacterium elongatum DSM 19469	1294273	Proteobacteria	Alphaproteobacteria	65.7	Complete Genome	ftp://ftp.ncbi.nlm.nih.gov/genomes/all/GCA/000/590/925/GCA_000590925.1_ASM59092v1
Brucella suis bv. 1 str. S2	1004954	Proteobacteria	Alphaproteobacteria	57.2364	Complete Genome	ftp://ftp.ncbi.nlm.nih.gov/genomes/all/GCA/000/600/055/GCA_000600055.1_ASM60005v1
Azospirillum brasilense	192	Proteobacteria	Alphaproteobacteria	68.5351	Complete Genome	ftp://ftp.ncbi.nlm.nih.gov/genomes/all/GCA/000/632/475/GCA_000632475.2_ASM63247v2
Ehrlichia chaffeensis str. Heartland	1249651	Proteobacteria	Alphaproteobacteria	30.1	Complete Genome	ftp://ftp.ncbi.nlm.nih.gov/genomes/all/GCA/000/632/815/GCA_000632815.1_ASM63281v1
Ehrlichia sp. HF	391036	Proteobacteria	Alphaproteobacteria	29.6	Complete Genome	ftp://ftp.ncbi.nlm.nih.gov/genomes/all/GCA/000/632/845/GCA_000632845.1_ASM63284v1
Ehrlichia chaffeensis str. Jax	1249652	Proteobacteria	Alphaproteobacteria	30.1	Complete Genome	ftp://ftp.ncbi.nlm.nih.gov/genomes/all/GCA/000/632/865/GCA_000632865.1_ASM63286v1
Ehrlichia chaffeensis str. Liberty	1249653	Proteobacteria	Alphaproteobacteria	30.1	Complete Genome	ftp://ftp.ncbi.nlm.nih.gov/genomes/all/GCA/000/632/885/GCA_000632885.1_ASM63288v1
Ehrlichia chaffeensis str. Osceola	1249654	Proteobacteria	Alphaproteobacteria	30.1	Complete Genome	ftp://ftp.ncbi.nlm.nih.gov/genomes/all/GCA/000/632/905/GCA_000632905.1_ASM63290v1
Ehrlichia chaffeensis str. Saint Vincent	1249655	Proteobacteria	Alphaproteobacteria	30.1	Complete Genome	ftp://ftp.ncbi.nlm.nih.gov/genomes/all/GCA/000/632/925/GCA_000632925.1_ASM63292v1
Ehrlichia chaffeensis str. Wakulla	1249656	Proteobacteria	Alphaproteobacteria	30.1	Complete Genome	ftp://ftp.ncbi.nlm.nih.gov/genomes/all/GCA/000/632/945/GCA_000632945.1_ASM63294v1
Ehrlichia chaffeensis str. West Paces	1249650	Proteobacteria	Alphaproteobacteria	30.1	Complete Genome	ftp://ftp.ncbi.nlm.nih.gov/genomes/all/GCA/000/632/965/GCA_000632965.1_ASM63296v1
Neorickettsia helminthoeca str. Oregon	1286528	Proteobacteria	Alphaproteobacteria	41.7	Complete Genome	ftp://ftp.ncbi.nlm.nih.gov/genomes/all/GCA/000/632/985/GCA_000632985.1_ASM63298v1
Brevundimonas naejangsanensis	588932	Proteobacteria	Alphaproteobacteria	67.5	Complete Genome	ftp://ftp.ncbi.nlm.nih.gov/genomes/all/GCA/000/635/915/GCA_000635915.2_ASM63591v2
Bartonella tribocorum	85701	Proteobacteria	Alphaproteobacteria	38.7661	Complete Genome	ftp://ftp.ncbi.nlm.nih.gov/genomes/all/GCA/000/689/355/GCA_000689355.1_PRJEB5999_assembly_1
Anaplasma phagocytophilum str. Norway variant2	1392507	Proteobacteria	Alphaproteobacteria	41.7	Complete Genome	ftp://ftp.ncbi.nlm.nih.gov/genomes/all/GCA/000/689/635/GCA_000689635.2_ASM68963v2
Ensifer adhaerens	106592	Proteobacteria	Alphaproteobacteria	62.298	Complete Genome	ftp://ftp.ncbi.nlm.nih.gov/genomes/all/GCA/000/697/965/GCA_000697965.2_ASM69796v2
Brucella suis bv. 2	645170	Proteobacteria	Alphaproteobacteria	57.1841	Complete Genome	ftp://ftp.ncbi.nlm.nih.gov/genomes/all/GCA/000/698/285/GCA_000698285.1_ASM69828v1
Rhizobium sp. IE4771	1301032	Proteobacteria	Alphaproteobacteria	61.0944	Complete Genome	ftp://ftp.ncbi.nlm.nih.gov/genomes/all/GCA/000/698/845/GCA_000698845.1_ASM69884v1
Sinorhizobium americanum CCGM7	1408224	Proteobacteria	Alphaproteobacteria	62.1917	Complete Genome	ftp://ftp.ncbi.nlm.nih.gov/genomes/all/GCA/000/705/595/GCA_000705595.2_ASM70559v2
Sphingomonas wittichii DC-6	1283312	Proteobacteria	Alphaproteobacteria	67.1123	Complete Genome	ftp://ftp.ncbi.nlm.nih.gov/genomes/all/GCA/000/715/175/GCA_000715175.2_ASM71517v2
Acetobacter pasteurianus 386B	1266844	Proteobacteria	Alphaproteobacteria	52.8532	Complete Genome	ftp://ftp.ncbi.nlm.nih.gov/genomes/all/GCA/000/723/785/GCA_000723785.1_AP1
Nitrospirillum amazonense CBAmc	1441467	Proteobacteria	Alphaproteobacteria	67.4958	Complete Genome	ftp://ftp.ncbi.nlm.nih.gov/genomes/all/GCA/000/730/165/GCA_000730165.2_ASM73016v2
endosymbiont of Acanthamoeba sp. UWC8	86106	Proteobacteria	Alphaproteobacteria	34.8	Complete Genome	ftp://ftp.ncbi.nlm.nih.gov/genomes/all/GCA/000/730/245/GCA_000730245.1_ASM73024v1
Neorhizobium galegae bv. officinalis bv. officinalis str. HAMBI 1141	1028801	Proteobacteria	Alphaproteobacteria	61.258	Complete Genome	ftp://ftp.ncbi.nlm.nih.gov/genomes/all/GCA/000/731/295/GCA_000731295.1_RG1141_Ch_pA_pB
Neorhizobium galegae bv. orientalis str. HAMBI 540	1028800	Proteobacteria	Alphaproteobacteria	61.248	Complete Genome	ftp://ftp.ncbi.nlm.nih.gov/genomes/all/GCA/000/731/315/GCA_000731315.1_RG540_Ch_pA
Planktomarina temperata RCA23	666509	Proteobacteria	Alphaproteobacteria	53.6	Complete Genome	ftp://ftp.ncbi.nlm.nih.gov/genomes/all/GCA/000/738/435/GCA_000738435.1_ASM73843v1
Brucella abortus	235	Proteobacteria	Alphaproteobacteria	57.1706	Complete Genome	ftp://ftp.ncbi.nlm.nih.gov/genomes/all/GCA/000/740/135/GCA_000740135.1_ASM74013v1
Brucella abortus bv. 9 str. C68	520455	Proteobacteria	Alphaproteobacteria	57.2352	Complete Genome	ftp://ftp.ncbi.nlm.nih.gov/genomes/all/GCA/000/740/195/GCA_000740195.1_ASM74019v1
Brucella abortus bv. 6 str. 870	520454	Proteobacteria	Alphaproteobacteria	57.2353	Complete Genome	ftp://ftp.ncbi.nlm.nih.gov/genomes/all/GCA/000/740/215/GCA_000740215.1_ASM74021v1
Brucella suis	29461	Proteobacteria	Alphaproteobacteria	57.2716	Complete Genome	ftp://ftp.ncbi.nlm.nih.gov/genomes/all/GCA/000/740/235/GCA_000740235.1_ASM74023v1
Brucella suis bv. 3 str. 686	520487	Proteobacteria	Alphaproteobacteria	57.2361	Complete Genome	ftp://ftp.ncbi.nlm.nih.gov/genomes/all/GCA/000/740/255/GCA_000740255.1_ASM74025v1
Brucella pinnipedialis	120576	Proteobacteria	Alphaproteobacteria	57.2716	Complete Genome	ftp://ftp.ncbi.nlm.nih.gov/genomes/all/GCA/000/740/275/GCA_000740275.1_ASM74027v1
Brucella canis	36855	Proteobacteria	Alphaproteobacteria	57.2364	Complete Genome	ftp://ftp.ncbi.nlm.nih.gov/genomes/all/GCA/000/740/335/GCA_000740335.1_ASM74033v1
Brucella melitensis bv. 3 str. Ether	520466	Proteobacteria	Alphaproteobacteria	57.2359	Complete Genome	ftp://ftp.ncbi.nlm.nih.gov/genomes/all/GCA/000/740/355/GCA_000740355.1_ASM74035v1
Brucella abortus bv. 2 str. 86/8/59	520450	Proteobacteria	Alphaproteobacteria	57.2354	Complete Genome	ftp://ftp.ncbi.nlm.nih.gov/genomes/all/GCA/000/740/375/GCA_000740375.1_ASM74037v1
Brucella melitensis bv. 1 str. 16M	224914	Proteobacteria	Alphaproteobacteria	57.2357	Complete Genome	ftp://ftp.ncbi.nlm.nih.gov/genomes/all/GCA/000/740/415/GCA_000740415.1_ASM74041v1
Candidatus Paracaedibacter acanthamoebae	91604	Proteobacteria	Alphaproteobacteria	40.9697	Complete Genome	ftp://ftp.ncbi.nlm.nih.gov/genomes/all/GCA/000/742/835/GCA_000742835.1_ASM74283v1
Ochrobactrum anthropi	529	Proteobacteria	Alphaproteobacteria	56.0831	Complete Genome	ftp://ftp.ncbi.nlm.nih.gov/genomes/all/GCA/000/742/955/GCA_000742955.1_ASM74295v1
Candidatus Paracaedimonas acanthamoebae	244581	Proteobacteria	Alphaproteobacteria	37.9185	Complete Genome	ftp://ftp.ncbi.nlm.nih.gov/genomes/all/GCA/000/743/035/GCA_000743035.1_ASM74303v1
Rickettsiales bacterium Ac37b	1528098	Proteobacteria	Alphaproteobacteria	30.7953	Complete Genome	ftp://ftp.ncbi.nlm.nih.gov/genomes/all/GCA/000/746/585/GCA_000746585.2_ASM74658v2
Sinorhizobium meliloti	382	Proteobacteria	Alphaproteobacteria	62.2727	Complete Genome	ftp://ftp.ncbi.nlm.nih.gov/genomes/all/GCA/000/747/295/GCA_000747295.1_ASM74729v1
Methylobacterium oryzae CBMB20	693986	Proteobacteria	Alphaproteobacteria	69.8	Complete Genome	ftp://ftp.ncbi.nlm.nih.gov/genomes/all/GCA/000/757/795/GCA_000757795.1_ASM75779v1
Sphingomonas taxi	1549858	Proteobacteria	Alphaproteobacteria	67.8923	Complete Genome	ftp://ftp.ncbi.nlm.nih.gov/genomes/all/GCA/000/764/535/GCA_000764535.1_ASM76453v1
Novosphingobium pentaromativorans US6-1	1088721	Proteobacteria	Alphaproteobacteria	63.0142	Complete Genome	ftp://ftp.ncbi.nlm.nih.gov/genomes/all/GCA/000/767/465/GCA_000767465.1_ASM76746v1
Sphingopyxis fribergensis	1515612	Proteobacteria	Alphaproteobacteria	63.7957	Complete Genome	ftp://ftp.ncbi.nlm.nih.gov/genomes/all/GCA/000/803/645/GCA_000803645.1_ASM80364v1
Bradyrhizobium japonicum	375	Proteobacteria	Alphaproteobacteria	63.7	Complete Genome	ftp://ftp.ncbi.nlm.nih.gov/genomes/all/GCA/000/807/315/GCA_000807315.1_ASM80731v1
Halocynthiibacter arcticus	1579316	Proteobacteria	Alphaproteobacteria	53.1521	Complete Genome	ftp://ftp.ncbi.nlm.nih.gov/genomes/all/GCA/000/812/665/GCA_000812665.2_ASM81266v2
Rhizobium etli bv. phaseoli str. IE4803	1432049	Proteobacteria	Alphaproteobacteria	61.096	Complete Genome	ftp://ftp.ncbi.nlm.nih.gov/genomes/all/GCA/000/816/125/GCA_000816125.1_ASM81612v1
Rhizobium gallicum bv. gallicum R602	1418105	Proteobacteria	Alphaproteobacteria	59.6336	Complete Genome	ftp://ftp.ncbi.nlm.nih.gov/genomes/all/GCA/000/816/845/GCA_000816845.1_ASM81684v1
Celeribacter indicus	1208324	Proteobacteria	Alphaproteobacteria	65.7311	Complete Genome	ftp://ftp.ncbi.nlm.nih.gov/genomes/all/GCA/000/819/565/GCA_000819565.1_ASM81956v1
Methyloceanibacter caenitepidi	1384459	Proteobacteria	Alphaproteobacteria	62.8	Complete Genome	ftp://ftp.ncbi.nlm.nih.gov/genomes/all/GCA/000/828/475/GCA_000828475.1_ASM82847v1
Wolbachia endosymbiont of Cimex lectularius	246273	Proteobacteria	Alphaproteobacteria	36.3	Complete Genome	ftp://ftp.ncbi.nlm.nih.gov/genomes/all/GCA/000/829/315/GCA_000829315.1_ASM82931v1
Candidatus Liberibacter asiaticus str. Ishi-1	931202	Proteobacteria	Alphaproteobacteria	36.3	Complete Genome	ftp://ftp.ncbi.nlm.nih.gov/genomes/all/GCA/000/829/355/GCA_000829355.1_ASM82935v1
Rickettsia rickettsii str. R	1338411	Proteobacteria	Alphaproteobacteria	32.5	Complete Genome	ftp://ftp.ncbi.nlm.nih.gov/genomes/all/GCA/000/831/525/GCA_000831525.1_ASM83152v1
Rickettsia rickettsii str. Morgan	1337396	Proteobacteria	Alphaproteobacteria	32.5	Complete Genome	ftp://ftp.ncbi.nlm.nih.gov/genomes/all/GCA/000/831/545/GCA_000831545.1_ASM83154v1
Novosphingobium sp. P6W	1609758	Proteobacteria	Alphaproteobacteria	63.6717	Complete Genome	ftp://ftp.ncbi.nlm.nih.gov/genomes/all/GCA/000/876/675/GCA_000876675.2_ASM87667v2
Sphingomonas hengshuiensis	1609977	Proteobacteria	Alphaproteobacteria	66.6711	Complete Genome	ftp://ftp.ncbi.nlm.nih.gov/genomes/all/GCA/000/935/025/GCA_000935025.1_ASM93502v1
Sphingobium sp. YBL2	484429	Proteobacteria	Alphaproteobacteria	64.4244	Complete Genome	ftp://ftp.ncbi.nlm.nih.gov/genomes/all/GCA/000/943/805/GCA_000943805.1_ASM94380v1
Wolbachia endosymbiont of Drosophila simulans wAu	225364	Proteobacteria	Alphaproteobacteria	35.2	Complete Genome	ftp://ftp.ncbi.nlm.nih.gov/genomes/all/GCA/000/953/315/GCA_000953315.1_Wau001
Martelella endophytica	1486262	Proteobacteria	Alphaproteobacteria	62.1	Complete Genome	ftp://ftp.ncbi.nlm.nih.gov/genomes/all/GCA/000/960/975/GCA_000960975.1_ASM96097v1
Rhizobium sp. NT-26	1125847	Proteobacteria	Alphaproteobacteria	61.8736	Complete Genome	ftp://ftp.ncbi.nlm.nih.gov/genomes/all/GCA/000/967/425/GCA_000967425.1_ASM96742v1
Magnetospira sp. QH-2	1288970	Proteobacteria	Alphaproteobacteria	59.4647	Complete Genome	ftp://ftp.ncbi.nlm.nih.gov/genomes/all/GCA/000/968/135/GCA_000968135.1_ASM96813v1
Candidatus Filomicrobium marinum	1608628	Proteobacteria	Alphaproteobacteria	57.3	Complete Genome	ftp://ftp.ncbi.nlm.nih.gov/genomes/all/GCA/000/981/545/GCA_000981545.1_Y1
Altererythrobacter atlanticus	1267766	Proteobacteria	Alphaproteobacteria	61.9128	Complete Genome	ftp://ftp.ncbi.nlm.nih.gov/genomes/all/GCA/001/008/165/GCA_001008165.2_ASM100816v2
Hoeflea sp. IMCC20628	1620421	Proteobacteria	Alphaproteobacteria	58.7916	Complete Genome	ftp://ftp.ncbi.nlm.nih.gov/genomes/all/GCA/001/011/155/GCA_001011155.1_ASM101115v1
Candidatus Liberibacter africanus PTSAPSY	1277257	Proteobacteria	Alphaproteobacteria	34.5	Complete Genome	ftp://ftp.ncbi.nlm.nih.gov/genomes/all/GCA/001/021/085/GCA_001021085.1_ASM102108v1
Altererythrobacter marensis	543877	Proteobacteria	Alphaproteobacteria	64.7	Complete Genome	ftp://ftp.ncbi.nlm.nih.gov/genomes/all/GCA/001/028/625/GCA_001028625.1_ASM102862v1
Croceicoccus naphthovorans	1348774	Proteobacteria	Alphaproteobacteria	62.604	Complete Genome	ftp://ftp.ncbi.nlm.nih.gov/genomes/all/GCA/001/028/705/GCA_001028705.1_ASM102870v1
Marinovum algicola DG 898	988812	Proteobacteria	Alphaproteobacteria	65.2283	Complete Genome	ftp://ftp.ncbi.nlm.nih.gov/genomes/all/GCA/001/046/955/GCA_001046955.1_ASM104695v1
Sinorhizobium meliloti RU11/001	1401243	Proteobacteria	Alphaproteobacteria	61.8324	Complete Genome	ftp://ftp.ncbi.nlm.nih.gov/genomes/all/GCA/001/050/915/GCA_001050915.2_ASM105091v2
Erythrobacter atlanticus	1648404	Proteobacteria	Alphaproteobacteria	58.3525	Complete Genome	ftp://ftp.ncbi.nlm.nih.gov/genomes/all/GCA/001/077/815/GCA_001077815.2_ASM107781v2
Acetobacter pasteurianus	438	Proteobacteria	Alphaproteobacteria	53.3	Complete Genome	ftp://ftp.ncbi.nlm.nih.gov/genomes/all/GCA/001/183/745/GCA_001183745.1_ASM118374v1
Devosia sp. H5989	1643450	Proteobacteria	Alphaproteobacteria	64.8	Complete Genome	ftp://ftp.ncbi.nlm.nih.gov/genomes/all/GCA/001/185/205/GCA_001185205.1_ASM118520v1
Octadecabacter temperatus	1458307	Proteobacteria	Alphaproteobacteria	54.6662	Complete Genome	ftp://ftp.ncbi.nlm.nih.gov/genomes/all/GCA/001/187/845/GCA_001187845.1_ASM118784v1
Chelatococcus sp. CO-6	1702325	Proteobacteria	Alphaproteobacteria	68.7486	Complete Genome	ftp://ftp.ncbi.nlm.nih.gov/genomes/all/GCA/001/271/345/GCA_001271345.1_ASM127134v1
Rickettsia amblyommatis	33989	Proteobacteria	Alphaproteobacteria	32.4132	Complete Genome	ftp://ftp.ncbi.nlm.nih.gov/genomes/all/GCA/001/273/795/GCA_001273795.1_ASM127379v1
Sphingopyxis sp. 113P3	292913	Proteobacteria	Alphaproteobacteria	64	Complete Genome	ftp://ftp.ncbi.nlm.nih.gov/genomes/all/GCA/001/278/035/GCA_001278035.1_ASM127803v1
Bartonella ancashensis	1318743	Proteobacteria	Alphaproteobacteria	38.4	Complete Genome	ftp://ftp.ncbi.nlm.nih.gov/genomes/all/GCA/001/281/405/GCA_001281405.1_ASM128140v1
Altererythrobacter epoxidivorans	361183	Proteobacteria	Alphaproteobacteria	61.5	Complete Genome	ftp://ftp.ncbi.nlm.nih.gov/genomes/all/GCA/001/281/485/GCA_001281485.1_ASM128148v1
Brucella abortus 104M	1210454	Proteobacteria	Alphaproteobacteria	57.2354	Complete Genome	ftp://ftp.ncbi.nlm.nih.gov/genomes/all/GCA/001/296/965/GCA_001296965.1_ASM129696v1
Citromicrobium sp. JL477	1634516	Proteobacteria	Alphaproteobacteria	65	Complete Genome	ftp://ftp.ncbi.nlm.nih.gov/genomes/all/GCA/001/304/795/GCA_001304795.1_ASM130479v1
Azospirillum thiophilum	528244	Proteobacteria	Alphaproteobacteria	68.1638	Complete Genome	ftp://ftp.ncbi.nlm.nih.gov/genomes/all/GCA/001/305/595/GCA_001305595.1_ASM130559v1
Confluentimicrobium sp. EMB200-NS6	1609966	Proteobacteria	Alphaproteobacteria	64.122	Complete Genome	ftp://ftp.ncbi.nlm.nih.gov/genomes/all/GCA/001/305/615/GCA_001305615.1_ASM130561v1
Sphingopyxis macrogoltabida	33050	Proteobacteria	Alphaproteobacteria	64.6475	Complete Genome	ftp://ftp.ncbi.nlm.nih.gov/genomes/all/GCA/001/307/295/GCA_001307295.1_ASM130729v1
Celeribacter marinus	1397108	Proteobacteria	Alphaproteobacteria	56.2	Complete Genome	ftp://ftp.ncbi.nlm.nih.gov/genomes/all/GCA/001/308/265/GCA_001308265.1_ASM130826v1
Brevundimonas sp. DS20	1532555	Proteobacteria	Alphaproteobacteria	67.4	Complete Genome	ftp://ftp.ncbi.nlm.nih.gov/genomes/all/GCA/001/310/255/GCA_001310255.1_ASM131025v1
Ketogulonicigenium vulgare	92945	Proteobacteria	Alphaproteobacteria	61.734	Complete Genome	ftp://ftp.ncbi.nlm.nih.gov/genomes/all/GCA/001/399/515/GCA_001399515.1_ASM139951v1
Caulobacter henricii	69395	Proteobacteria	Alphaproteobacteria	65.7906	Complete Genome	ftp://ftp.ncbi.nlm.nih.gov/genomes/all/GCA/001/414/055/GCA_001414055.1_ASM141405v1
Rickettsia rhipicephali	33992	Proteobacteria	Alphaproteobacteria	32.2645	Complete Genome	ftp://ftp.ncbi.nlm.nih.gov/genomes/all/GCA/001/442/475/GCA_001442475.1_ASM144247v1
Aureimonas sp. AU20	1349819	Proteobacteria	Alphaproteobacteria	66.7129	Complete Genome	ftp://ftp.ncbi.nlm.nih.gov/genomes/all/GCA/001/442/755/GCA_001442755.1_ASM144275v1
Sphingobium baderi	1332080	Proteobacteria	Alphaproteobacteria	62.4082	Complete Genome	ftp://ftp.ncbi.nlm.nih.gov/genomes/all/GCA/001/456/115/GCA_001456115.1_ASM145611v1
Pannonibacter phragmitetus	121719	Proteobacteria	Alphaproteobacteria	63.3371	Complete Genome	ftp://ftp.ncbi.nlm.nih.gov/genomes/all/GCA/001/484/065/GCA_001484065.1_ASM148406v1
Acetobacter senegalensis	446692	Proteobacteria	Alphaproteobacteria	54.4792	Complete Genome	ftp://ftp.ncbi.nlm.nih.gov/genomes/all/GCA/001/499/615/GCA_001499615.1_Acetobacter_senegalensis_108B
Magnetospirillum sp. XM-1	1663591	Proteobacteria	Alphaproteobacteria	65.6302	Complete Genome	ftp://ftp.ncbi.nlm.nih.gov/genomes/all/GCA/001/511/835/GCA_001511835.1_XM-1
Methylobacterium sp. AMS5	925818	Proteobacteria	Alphaproteobacteria	68.4101	Complete Genome	ftp://ftp.ncbi.nlm.nih.gov/genomes/all/GCA/001/542/815/GCA_001542815.1_ASM154281v1
Liberibacter crescens	1273132	Proteobacteria	Alphaproteobacteria	35.4	Complete Genome	ftp://ftp.ncbi.nlm.nih.gov/genomes/all/GCA/001/543/305/GCA_001543305.1_ASM154330v1
Asaia bogorensis NBRC 16594	1231624	Proteobacteria	Alphaproteobacteria	59.8	Complete Genome	ftp://ftp.ncbi.nlm.nih.gov/genomes/all/GCA/001/547/995/GCA_001547995.1_ASM154799v1
Methylobacterium aquaticum	270351	Proteobacteria	Alphaproteobacteria	70.7725	Complete Genome	ftp://ftp.ncbi.nlm.nih.gov/genomes/all/GCA/001/548/015/GCA_001548015.1_ASM154801v1
Rhodovulum sulfidophilum	35806	Proteobacteria	Alphaproteobacteria	66.8886	Complete Genome	ftp://ftp.ncbi.nlm.nih.gov/genomes/all/GCA/001/548/075/GCA_001548075.1_ASM154807v1
Blastochloris viridis	1079	Proteobacteria	Alphaproteobacteria	67.9	Complete Genome	ftp://ftp.ncbi.nlm.nih.gov/genomes/all/GCA/001/548/155/GCA_001548155.2_BV133_assembly_1.0
Bradyrhizobium diazoefficiens	1355477	Proteobacteria	Alphaproteobacteria	63.5453	Complete Genome	ftp://ftp.ncbi.nlm.nih.gov/genomes/all/GCA/001/549/695/GCA_001549695.1_ASM154969v1
Sphingopyxis granuli	267128	Proteobacteria	Alphaproteobacteria	66.2	Complete Genome	ftp://ftp.ncbi.nlm.nih.gov/genomes/all/GCA/001/559/015/GCA_001559015.1_ASM155901v1
Bartonella bacilliformis	774	Proteobacteria	Alphaproteobacteria	38.2	Complete Genome	ftp://ftp.ncbi.nlm.nih.gov/genomes/all/GCA/001/559/035/GCA_001559035.2_ASM155903v2
Bosea sp. PAMC 26642	1792307	Proteobacteria	Alphaproteobacteria	65.2016	Complete Genome	ftp://ftp.ncbi.nlm.nih.gov/genomes/all/GCA/001/562/255/GCA_001562255.1_ASM156225v1
Sphingobium sp. TKS	1315974	Proteobacteria	Alphaproteobacteria	63.0804	Complete Genome	ftp://ftp.ncbi.nlm.nih.gov/genomes/all/GCA/001/563/265/GCA_001563265.1_ASM156326v1
Sphingobium sp. MI1205	407020	Proteobacteria	Alphaproteobacteria	62.3365	Complete Genome	ftp://ftp.ncbi.nlm.nih.gov/genomes/all/GCA/001/563/285/GCA_001563285.1_ASM156328v1
Martelella sp. AD-3	686597	Proteobacteria	Alphaproteobacteria	62.2813	Complete Genome	ftp://ftp.ncbi.nlm.nih.gov/genomes/all/GCA/001/578/105/GCA_001578105.1_ASM157810v1
Rhodoplanes sp. Z2-YC6860	674703	Proteobacteria	Alphaproteobacteria	63.5	Complete Genome	ftp://ftp.ncbi.nlm.nih.gov/genomes/all/GCA/001/579/845/GCA_001579845.1_ASM157984v1
Labrenzia sp. CP4	1674922	Proteobacteria	Alphaproteobacteria	58.9495	Complete Genome	ftp://ftp.ncbi.nlm.nih.gov/genomes/all/GCA/001/579/905/GCA_001579905.1_ASM157990v1
Sphingorhabdus sp. M41	1806885	Proteobacteria	Alphaproteobacteria	56.7	Complete Genome	ftp://ftp.ncbi.nlm.nih.gov/genomes/all/GCA/001/586/275/GCA_001586275.1_ASM158627v1
Rickettsia prowazekii	782	Proteobacteria	Alphaproteobacteria	29	Complete Genome	ftp://ftp.ncbi.nlm.nih.gov/genomes/all/GCA/001/602/215/GCA_001602215.1_ASM160221v1
Hyphomonadaceae bacterium UKL13-1	1690484	Proteobacteria	Alphaproteobacteria	56.1	Complete Genome	ftp://ftp.ncbi.nlm.nih.gov/genomes/all/GCA/001/602/435/GCA_001602435.1_ASM160243v1
Aminobacter aminovorans	83263	Proteobacteria	Alphaproteobacteria	63.0916	Complete Genome	ftp://ftp.ncbi.nlm.nih.gov/genomes/all/GCA/001/605/015/GCA_001605015.1_ASM160501v1
Sphingopyxis terrae subsp. terrae NBRC 15098	1219058	Proteobacteria	Alphaproteobacteria	64.5923	Complete Genome	ftp://ftp.ncbi.nlm.nih.gov/genomes/all/GCA/001/610/975/GCA_001610975.1_ASM161097v1
Haematospirillum jordaniae	1549855	Proteobacteria	Alphaproteobacteria	55.474	Complete Genome	ftp://ftp.ncbi.nlm.nih.gov/genomes/all/GCA/001/611/975/GCA_001611975.1_ASM161197v1
Mesorhizobium ciceri	39645	Proteobacteria	Alphaproteobacteria	62.4946	Complete Genome	ftp://ftp.ncbi.nlm.nih.gov/genomes/all/GCA/001/618/825/GCA_001618825.1_ASM161882v1
Mesorhizobium ciceri biovar biserrulae	278148	Proteobacteria	Alphaproteobacteria	62.5149	Complete Genome	ftp://ftp.ncbi.nlm.nih.gov/genomes/all/GCA/001/618/845/GCA_001618845.1_ASM161884v1
Defluviimonas alba	1335048	Proteobacteria	Alphaproteobacteria	66.5215	Complete Genome	ftp://ftp.ncbi.nlm.nih.gov/genomes/all/GCA/001/620/265/GCA_001620265.1_ASM162026v1
Rhodovulum sulfidophilum DSM 1374	1188256	Proteobacteria	Alphaproteobacteria	66.9181	Complete Genome	ftp://ftp.ncbi.nlm.nih.gov/genomes/all/GCA/001/633/165/GCA_001633165.1_ASM163316v1
Brevundimonas sp. GW460-12-10-14-LB2	1827469	Proteobacteria	Alphaproteobacteria	66.2	Complete Genome	ftp://ftp.ncbi.nlm.nih.gov/genomes/all/GCA/001/636/925/GCA_001636925.1_ASM163692v1
Sphingomonas sp. NIC1	1961362	Proteobacteria	Alphaproteobacteria	67.2344	Complete Genome	ftp://ftp.ncbi.nlm.nih.gov/genomes/all/GCA/001/638/925/GCA_001638925.1_ASM163892v1
Bradyrhizobium diazoefficiens USDA 110	224911	Proteobacteria	Alphaproteobacteria	64.1	Complete Genome	ftp://ftp.ncbi.nlm.nih.gov/genomes/all/GCA/001/642/675/GCA_001642675.1_ASM164267v1
Ochrobactrum pseudogrignonense	419475	Proteobacteria	Alphaproteobacteria	53.7131	Complete Genome	ftp://ftp.ncbi.nlm.nih.gov/genomes/all/GCA/001/652/485/GCA_001652485.1_ASM165248v1
Shinella sp. HZN7	879274	Proteobacteria	Alphaproteobacteria	64.7972	Complete Genome	ftp://ftp.ncbi.nlm.nih.gov/genomes/all/GCA/001/652/565/GCA_001652565.1_ASM165256v1
Sphingobium sp. EP60837	1855519	Proteobacteria	Alphaproteobacteria	61.9044	Complete Genome	ftp://ftp.ncbi.nlm.nih.gov/genomes/all/GCA/001/658/005/GCA_001658005.1_ASM165800v1
Croceicoccus marinus	450378	Proteobacteria	Alphaproteobacteria	64.5058	Complete Genome	ftp://ftp.ncbi.nlm.nih.gov/genomes/all/GCA/001/661/675/GCA_001661675.2_ASM166167v2
Porphyrobacter neustonensis	1112	Proteobacteria	Alphaproteobacteria	65.3	Complete Genome	ftp://ftp.ncbi.nlm.nih.gov/genomes/all/GCA/001/663/175/GCA_001663175.1_ASM166317v1
Rhizobiales bacterium NRL2	1862950	Proteobacteria	Alphaproteobacteria	67.1	Complete Genome	ftp://ftp.ncbi.nlm.nih.gov/genomes/all/GCA/001/664/005/GCA_001664005.1_ASM166400v1
Rhizobium sp. N1341	1703962	Proteobacteria	Alphaproteobacteria	61.051	Complete Genome	ftp://ftp.ncbi.nlm.nih.gov/genomes/all/GCA/001/664/085/GCA_001664085.1_ASM166408v1
Rhizobium sp. N731	1703966	Proteobacteria	Alphaproteobacteria	61.2063	Complete Genome	ftp://ftp.ncbi.nlm.nih.gov/genomes/all/GCA/001/664/145/GCA_001664145.1_ASM166414v1
Rhizobium esperanzae	1967781	Proteobacteria	Alphaproteobacteria	61.097	Complete Genome	ftp://ftp.ncbi.nlm.nih.gov/genomes/all/GCA/001/664/265/GCA_001664265.1_ASM166426v1
Rhizobium sp. N1314	1703961	Proteobacteria	Alphaproteobacteria	61.2063	Complete Genome	ftp://ftp.ncbi.nlm.nih.gov/genomes/all/GCA/001/664/305/GCA_001664305.1_ASM166430v1
Rhizobium sp. N621	1703964	Proteobacteria	Alphaproteobacteria	61.0923	Complete Genome	ftp://ftp.ncbi.nlm.nih.gov/genomes/all/GCA/001/664/325/GCA_001664325.1_ASM166432v1
Rhizobium sp. N113	1703960	Proteobacteria	Alphaproteobacteria	61.0969	Complete Genome	ftp://ftp.ncbi.nlm.nih.gov/genomes/all/GCA/001/664/345/GCA_001664345.1_ASM166434v1
Rhizobium phaseoli	396	Proteobacteria	Alphaproteobacteria	61.3616	Complete Genome	ftp://ftp.ncbi.nlm.nih.gov/genomes/all/GCA/001/664/385/GCA_001664385.1_ASM166438v1
Rhizobium sp. N6212	1703965	Proteobacteria	Alphaproteobacteria	61.0929	Complete Genome	ftp://ftp.ncbi.nlm.nih.gov/genomes/all/GCA/001/664/465/GCA_001664465.1_ASM166446v1
Rhizobium sp. N324	1703969	Proteobacteria	Alphaproteobacteria	61.4303	Complete Genome	ftp://ftp.ncbi.nlm.nih.gov/genomes/all/GCA/001/664/485/GCA_001664485.1_ASM166448v1
Rhizobium sp. N871	1703968	Proteobacteria	Alphaproteobacteria	61.0971	Complete Genome	ftp://ftp.ncbi.nlm.nih.gov/genomes/all/GCA/001/664/525/GCA_001664525.1_ASM166452v1
Rhizobium sp. N741	1703967	Proteobacteria	Alphaproteobacteria	61.1198	Complete Genome	ftp://ftp.ncbi.nlm.nih.gov/genomes/all/GCA/001/664/545/GCA_001664545.1_ASM166454v1
Mesorhizobium sp. WSM1497	278153	Proteobacteria	Alphaproteobacteria	62.4154	Complete Genome	ftp://ftp.ncbi.nlm.nih.gov/genomes/all/GCA/001/672/455/GCA_001672455.2_ASM167245v2
Mesorhizobium loti NZP2037	935546	Proteobacteria	Alphaproteobacteria	62.7415	Complete Genome	ftp://ftp.ncbi.nlm.nih.gov/genomes/all/GCA/001/676/765/GCA_001676765.1_ASM167676v1
Caulobacteraceae bacterium OTSz_A_272	1759059	Proteobacteria	Alphaproteobacteria	61.5	Complete Genome	ftp://ftp.ncbi.nlm.nih.gov/genomes/all/GCA/001/679/665/GCA_001679665.1_ASM167966v1
Gluconobacter oxydans	442	Proteobacteria	Alphaproteobacteria	56.2	Complete Genome	ftp://ftp.ncbi.nlm.nih.gov/genomes/all/GCA/001/680/825/GCA_001680825.1_ASM168082v1
Mesorhizobium amorphae CCNWGS0123	1082933	Proteobacteria	Alphaproteobacteria	62.8379	Complete Genome	ftp://ftp.ncbi.nlm.nih.gov/genomes/all/GCA/001/686/985/GCA_001686985.1_ASM168698v1
Yangia sp. CCB-MM3	1792508	Proteobacteria	Alphaproteobacteria	64.9399	Complete Genome	ftp://ftp.ncbi.nlm.nih.gov/genomes/all/GCA/001/687/105/GCA_001687105.1_ASM168710v1
Altererythrobacter namhicola	645517	Proteobacteria	Alphaproteobacteria	65	Complete Genome	ftp://ftp.ncbi.nlm.nih.gov/genomes/all/GCA/001/687/545/GCA_001687545.1_ASM168754v1
Rhizobium sp. S41	1869170	Proteobacteria	Alphaproteobacteria	59.3	Complete Genome	ftp://ftp.ncbi.nlm.nih.gov/genomes/all/GCA/001/691/455/GCA_001691455.1_ASM169145v1
Bradyrhizobium icense	1274631	Proteobacteria	Alphaproteobacteria	62	Complete Genome	ftp://ftp.ncbi.nlm.nih.gov/genomes/all/GCA/001/693/385/GCA_001693385.1_ASM169338v1
Altererythrobacter dongtanensis	692370	Proteobacteria	Alphaproteobacteria	65.8	Complete Genome	ftp://ftp.ncbi.nlm.nih.gov/genomes/all/GCA/001/698/205/GCA_001698205.1_ASM169820v1
Sinorhizobium sp. RAC02	1842534	Proteobacteria	Alphaproteobacteria	62.4468	Complete Genome	ftp://ftp.ncbi.nlm.nih.gov/genomes/all/GCA/001/713/395/GCA_001713395.1_ASM171339v1
Sphingobium sp. RAC03	1843368	Proteobacteria	Alphaproteobacteria	62.9166	Complete Genome	ftp://ftp.ncbi.nlm.nih.gov/genomes/all/GCA/001/713/415/GCA_001713415.1_ASM171341v1
Blastomonas sp. RAC04	1842535	Proteobacteria	Alphaproteobacteria	63.8812	Complete Genome	ftp://ftp.ncbi.nlm.nih.gov/genomes/all/GCA/001/713/435/GCA_001713435.1_ASM171343v1
Bosea sp. RAC05	1842539	Proteobacteria	Alphaproteobacteria	67.6434	Complete Genome	ftp://ftp.ncbi.nlm.nih.gov/genomes/all/GCA/001/713/455/GCA_001713455.1_ASM171345v1
Agrobacterium sp. RAC06	1842536	Proteobacteria	Alphaproteobacteria	61.0784	Complete Genome	ftp://ftp.ncbi.nlm.nih.gov/genomes/all/GCA/001/713/475/GCA_001713475.1_ASM171347v1
Brucella sp. 2002734562	1891098	Proteobacteria	Alphaproteobacteria	57.2354	Complete Genome	ftp://ftp.ncbi.nlm.nih.gov/genomes/all/GCA/001/715/385/GCA_001715385.1_ASM171538v1
Sphingomonas panacis	1560345	Proteobacteria	Alphaproteobacteria	65.5201	Complete Genome	ftp://ftp.ncbi.nlm.nih.gov/genomes/all/GCA/001/717/955/GCA_001717955.1_ASM171795v1
Erythrobacter litoralis	39960	Proteobacteria	Alphaproteobacteria	65.2	Complete Genome	ftp://ftp.ncbi.nlm.nih.gov/genomes/all/GCA/001/719/165/GCA_001719165.1_ASM171916v1
Porphyrobacter sp. LM 6	1896196	Proteobacteria	Alphaproteobacteria	64.7	Complete Genome	ftp://ftp.ncbi.nlm.nih.gov/genomes/all/GCA/001/720/465/GCA_001720465.1_ASM172046v1
Bosea vaviloviae	1526658	Proteobacteria	Alphaproteobacteria	65.3684	Complete Genome	ftp://ftp.ncbi.nlm.nih.gov/genomes/all/GCA/001/741/865/GCA_001741865.1_ASM174186v1
Novosphingobium resinovorum	158500	Proteobacteria	Alphaproteobacteria	64.9171	Complete Genome	ftp://ftp.ncbi.nlm.nih.gov/genomes/all/GCA/001/742/225/GCA_001742225.1_ASM174222v1
Sphingomonas melonis TY	621456	Proteobacteria	Alphaproteobacteria	67.0559	Complete Genome	ftp://ftp.ncbi.nlm.nih.gov/genomes/all/GCA/001/761/345/GCA_001761345.1_ASM176134v1
Acetobacter ascendens	481146	Proteobacteria	Alphaproteobacteria	53.3405	Complete Genome	ftp://ftp.ncbi.nlm.nih.gov/genomes/all/GCA/001/766/255/GCA_001766255.1_ASM176625v1
Kozakia baliensis	153496	Proteobacteria	Alphaproteobacteria	57.3501	Complete Genome	ftp://ftp.ncbi.nlm.nih.gov/genomes/all/GCA/001/787/335/GCA_001787335.1_ASM178733v1
Rhodobacter sp. LPB0142	1850250	Proteobacteria	Alphaproteobacteria	66.9488	Complete Genome	ftp://ftp.ncbi.nlm.nih.gov/genomes/all/GCA/001/856/665/GCA_001856665.1_ASM185666v1
Rhodobaca barguzinensis	441209	Proteobacteria	Alphaproteobacteria	59	Complete Genome	ftp://ftp.ncbi.nlm.nih.gov/genomes/all/GCA/001/870/665/GCA_001870665.2_ASM187066v2
Erythrobacter gangjinensis	502682	Proteobacteria	Alphaproteobacteria	62.7169	Complete Genome	ftp://ftp.ncbi.nlm.nih.gov/genomes/all/GCA/001/886/695/GCA_001886695.1_ASM188669v1
Sulfitobacter sp. AM1-D1	1917485	Proteobacteria	Alphaproteobacteria	64.5153	Complete Genome	ftp://ftp.ncbi.nlm.nih.gov/genomes/all/GCA/001/886/735/GCA_001886735.1_ASM188673v1
Chelatococcus daeguensis	444444	Proteobacteria	Alphaproteobacteria	67.9261	Complete Genome	ftp://ftp.ncbi.nlm.nih.gov/genomes/all/GCA/001/887/265/GCA_001887265.1_ASM188726v1
Phaeobacter porticola	1844006	Proteobacteria	Alphaproteobacteria	58.5508	Complete Genome	ftp://ftp.ncbi.nlm.nih.gov/genomes/all/GCA/001/888/185/GCA_001888185.1_ASM188818v1
Sphingopyxis sp. LPB0140	1913578	Proteobacteria	Alphaproteobacteria	46.1	Complete Genome	ftp://ftp.ncbi.nlm.nih.gov/genomes/all/GCA/001/889/025/GCA_001889025.1_ASM188902v1
Sinorhizobium americanum	194963	Proteobacteria	Alphaproteobacteria	62.2856	Complete Genome	ftp://ftp.ncbi.nlm.nih.gov/genomes/all/GCA/001/889/105/GCA_001889105.1_ASM188910v1
Mesorhizobium oceanicum	1670800	Proteobacteria	Alphaproteobacteria	65.0596	Complete Genome	ftp://ftp.ncbi.nlm.nih.gov/genomes/all/GCA/001/889/605/GCA_001889605.1_ASM188960v1
Sphingomonas sp. JJ-A5	1921510	Proteobacteria	Alphaproteobacteria	63.2322	Complete Genome	ftp://ftp.ncbi.nlm.nih.gov/genomes/all/GCA/001/890/385/GCA_001890385.1_ASM189038v1
Rhizobium etli 8C-3	538025	Proteobacteria	Alphaproteobacteria	59.4876	Complete Genome	ftp://ftp.ncbi.nlm.nih.gov/genomes/all/GCA/001/908/375/GCA_001908375.1_ASM190837v1
Rhizobium gallicum	56730	Proteobacteria	Alphaproteobacteria	59.631	Complete Genome	ftp://ftp.ncbi.nlm.nih.gov/genomes/all/GCA/001/908/615/GCA_001908615.1_ASM190861v1
Marivivens sp. JLT3646	1920883	Proteobacteria	Alphaproteobacteria	56.0174	Complete Genome	ftp://ftp.ncbi.nlm.nih.gov/genomes/all/GCA/001/908/835/GCA_001908835.1_ASM190883v1
Sphingomonas koreensis	93064	Proteobacteria	Alphaproteobacteria	65.9451	Complete Genome	ftp://ftp.ncbi.nlm.nih.gov/genomes/all/GCA/001/922/385/GCA_001922385.1_ASM192238v1
Wolbachia endosymbiont of Folsomia candida	169402	Proteobacteria	Alphaproteobacteria	34.4	Complete Genome	ftp://ftp.ncbi.nlm.nih.gov/genomes/all/GCA/001/931/755/GCA_001931755.2_ASM193175v2
Methylobacterium phyllosphaerae	418223	Proteobacteria	Alphaproteobacteria	69.5555	Complete Genome	ftp://ftp.ncbi.nlm.nih.gov/genomes/all/GCA/001/936/175/GCA_001936175.1_ASM193617v1
Thioclava nitratireducens	1915078	Proteobacteria	Alphaproteobacteria	63.7799	Complete Genome	ftp://ftp.ncbi.nlm.nih.gov/genomes/all/GCA/001/940/525/GCA_001940525.2_ASM194052v2
Roseomonas gilardii	257708	Proteobacteria	Alphaproteobacteria	70.119	Complete Genome	ftp://ftp.ncbi.nlm.nih.gov/genomes/all/GCA/001/941/945/GCA_001941945.1_ASM194194v1
Rickettsia rickettsii	783	Proteobacteria	Alphaproteobacteria	32.4	Complete Genome	ftp://ftp.ncbi.nlm.nih.gov/genomes/all/GCA/001/951/015/GCA_001951015.1_ASM195101v1
Tateyamaria omphalii	299262	Proteobacteria	Alphaproteobacteria	61.9801	Complete Genome	ftp://ftp.ncbi.nlm.nih.gov/genomes/all/GCA/001/969/365/GCA_001969365.1_ASM196936v1
Salipiger profundus	1229727	Proteobacteria	Alphaproteobacteria	66.6415	Complete Genome	ftp://ftp.ncbi.nlm.nih.gov/genomes/all/GCA/001/969/385/GCA_001969385.1_ASM196938v1
Sphingomonas sp. LK11	1390395	Proteobacteria	Alphaproteobacteria	66.0897	Complete Genome	ftp://ftp.ncbi.nlm.nih.gov/genomes/all/GCA/001/971/605/GCA_001971605.1_ASM197160v1
Brucella sp. 09RB8471	1149952	Proteobacteria	Alphaproteobacteria	57.0638	Complete Genome	ftp://ftp.ncbi.nlm.nih.gov/genomes/all/GCA/001/971/625/GCA_001971625.1_ASM197162v1
Brucella sp. 09RB8910	1844051	Proteobacteria	Alphaproteobacteria	57.1	Complete Genome	ftp://ftp.ncbi.nlm.nih.gov/genomes/all/GCA/001/971/805/GCA_001971805.1_ASM197180v1
Pelagibaca abyssi	1250539	Proteobacteria	Alphaproteobacteria	65.6901	Complete Genome	ftp://ftp.ncbi.nlm.nih.gov/genomes/all/GCA/001/975/705/GCA_001975705.1_ASM197570v1
Sphingopyxis sp. QXT-31	1357916	Proteobacteria	Alphaproteobacteria	66.5	Complete Genome	ftp://ftp.ncbi.nlm.nih.gov/genomes/all/GCA/001/984/035/GCA_001984035.1_ASM198403v1
Labrenzia aggregata	187304	Proteobacteria	Alphaproteobacteria	58.8635	Complete Genome	ftp://ftp.ncbi.nlm.nih.gov/genomes/all/GCA/001/999/245/GCA_001999245.1_ASM199924v1
Brevundimonas sp. LM2	1938605	Proteobacteria	Alphaproteobacteria	68.4	Complete Genome	ftp://ftp.ncbi.nlm.nih.gov/genomes/all/GCA/002/002/865/GCA_002002865.1_ASM200286v1
Sphingomonas sp. LM7	1938607	Proteobacteria	Alphaproteobacteria	66.2	Complete Genome	ftp://ftp.ncbi.nlm.nih.gov/genomes/all/GCA/002/002/925/GCA_002002925.1_ASM200292v1
Agrobacterium rhizogenes	359	Proteobacteria	Alphaproteobacteria	59.6945	Complete Genome	ftp://ftp.ncbi.nlm.nih.gov/genomes/all/GCA/002/005/205/GCA_002005205.3_ASM200520v3
Candidatus Tokpelaia hoelldoblerii	1902579	Proteobacteria	Alphaproteobacteria	53.5	Complete Genome	ftp://ftp.ncbi.nlm.nih.gov/genomes/all/GCA/002/005/325/GCA_002005325.1_ASM200532v1
Acetobacter aceti	435	Proteobacteria	Alphaproteobacteria	56.8	Complete Genome	ftp://ftp.ncbi.nlm.nih.gov/genomes/all/GCA/002/005/445/GCA_002005445.1_ASM200544v1
Neoasaia chiangmaiensis	320497	Proteobacteria	Alphaproteobacteria	61.5	Complete Genome	ftp://ftp.ncbi.nlm.nih.gov/genomes/all/GCA/002/005/465/GCA_002005465.1_ASM200546v1
Gluconobacter albidus	318683	Proteobacteria	Alphaproteobacteria	59.4897	Complete Genome	ftp://ftp.ncbi.nlm.nih.gov/genomes/all/GCA/002/005/485/GCA_002005485.1_ASM200548v1
Acetobacter persici	1076596	Proteobacteria	Alphaproteobacteria	57.4437	Complete Genome	ftp://ftp.ncbi.nlm.nih.gov/genomes/all/GCA/002/006/565/GCA_002006565.1_ASM200656v1
Bartonella apis	1686310	Proteobacteria	Alphaproteobacteria	45.7	Complete Genome	ftp://ftp.ncbi.nlm.nih.gov/genomes/all/GCA/002/007/565/GCA_002007565.1_ASM200756v1
Komagataeibacter nataicola	265960	Proteobacteria	Alphaproteobacteria	61.4817	Complete Genome	ftp://ftp.ncbi.nlm.nih.gov/genomes/all/GCA/002/009/295/GCA_002009295.1_ASM200929v1
Bartonella sp. A1379B	1933910	Proteobacteria	Alphaproteobacteria	35.8	Complete Genome	ftp://ftp.ncbi.nlm.nih.gov/genomes/all/GCA/002/022/485/GCA_002022485.1_ASM202248v1
Bartonella sp. WD16.2	1933904	Proteobacteria	Alphaproteobacteria	37.6	Complete Genome	ftp://ftp.ncbi.nlm.nih.gov/genomes/all/GCA/002/022/505/GCA_002022505.1_ASM202250v1
Bartonella sp. Raccoon60	1933912	Proteobacteria	Alphaproteobacteria	36.1	Complete Genome	ftp://ftp.ncbi.nlm.nih.gov/genomes/all/GCA/002/022/585/GCA_002022585.1_ASM202258v1
Bartonella sp. JB15	1933906	Proteobacteria	Alphaproteobacteria	35.3	Complete Genome	ftp://ftp.ncbi.nlm.nih.gov/genomes/all/GCA/002/022/605/GCA_002022605.1_ASM202260v1
Bartonella sp. JB63	1933907	Proteobacteria	Alphaproteobacteria	35.3	Complete Genome	ftp://ftp.ncbi.nlm.nih.gov/genomes/all/GCA/002/022/665/GCA_002022665.1_ASM202266v1
Martelella mediterranea DSM 17316	1122214	Proteobacteria	Alphaproteobacteria	62.3845	Complete Genome	ftp://ftp.ncbi.nlm.nih.gov/genomes/all/GCA/002/043/005/GCA_002043005.1_ASM204300v1
Paracoccus yeei	147645	Proteobacteria	Alphaproteobacteria	67.0776	Complete Genome	ftp://ftp.ncbi.nlm.nih.gov/genomes/all/GCA/002/073/635/GCA_002073635.2_ASM207363v2
Rhodovulum sp. MB263	308754	Proteobacteria	Alphaproteobacteria	67.0269	Complete Genome	ftp://ftp.ncbi.nlm.nih.gov/genomes/all/GCA/002/073/975/GCA_002073975.1_ASM207397v1
Rickettsia bellii	33990	Proteobacteria	Alphaproteobacteria	31.6727	Complete Genome	ftp://ftp.ncbi.nlm.nih.gov/genomes/all/GCA/002/078/315/GCA_002078315.1_ASM207831v1
Rhodovulum sp. P5	1564506	Proteobacteria	Alphaproteobacteria	64.6513	Complete Genome	ftp://ftp.ncbi.nlm.nih.gov/genomes/all/GCA/002/079/305/GCA_002079305.1_ASM207930v1
Roseovarius mucosus	215743	Proteobacteria	Alphaproteobacteria	60.8491	Complete Genome	ftp://ftp.ncbi.nlm.nih.gov/genomes/all/GCA/002/080/415/GCA_002080415.1_ASM208041v1
Magnetospirillum sp. ME-1	1639348	Proteobacteria	Alphaproteobacteria	65.6	Complete Genome	ftp://ftp.ncbi.nlm.nih.gov/genomes/all/GCA/002/105/535/GCA_002105535.1_ASM210553v1
Paracoccus contaminans	1945662	Proteobacteria	Alphaproteobacteria	68.7279	Complete Genome	ftp://ftp.ncbi.nlm.nih.gov/genomes/all/GCA/002/105/555/GCA_002105555.1_ASM210555v1
Candidatus Nucleicultrix amoebiphila FS5	1414854	Proteobacteria	Alphaproteobacteria	39.7	Complete Genome	ftp://ftp.ncbi.nlm.nih.gov/genomes/all/GCA/002/117/145/GCA_002117145.1_ASM211714v1
Methylocystis bryophila	655015	Proteobacteria	Alphaproteobacteria	63.148	Complete Genome	ftp://ftp.ncbi.nlm.nih.gov/genomes/all/GCA/002/117/405/GCA_002117405.1_ASM211740v1
Ketogulonicigenium robustum	92947	Proteobacteria	Alphaproteobacteria	62.3303	Complete Genome	ftp://ftp.ncbi.nlm.nih.gov/genomes/all/GCA/002/117/445/GCA_002117445.1_ASM211744v1
Rhizobium sp. NXC14	1981173	Proteobacteria	Alphaproteobacteria	60.8747	Complete Genome	ftp://ftp.ncbi.nlm.nih.gov/genomes/all/GCA/002/117/485/GCA_002117485.1_ASM211748v1
Rhizobium sp. TAL182	2020313	Proteobacteria	Alphaproteobacteria	61.1892	Complete Genome	ftp://ftp.ncbi.nlm.nih.gov/genomes/all/GCA/002/117/725/GCA_002117725.1_ASM211772v1
Methylorubrum zatmanii	29429	Proteobacteria	Alphaproteobacteria	68.3	Complete Genome	ftp://ftp.ncbi.nlm.nih.gov/genomes/all/GCA/002/117/815/GCA_002117815.2_ASM211781v2
Pseudorhodoplanes sinuspersici	1235591	Proteobacteria	Alphaproteobacteria	60.3	Complete Genome	ftp://ftp.ncbi.nlm.nih.gov/genomes/all/GCA/002/119/765/GCA_002119765.1_ASM211976v1
Rhizobium etli	29449	Proteobacteria	Alphaproteobacteria	61.0228	Complete Genome	ftp://ftp.ncbi.nlm.nih.gov/genomes/all/GCA/002/119/845/GCA_002119845.1_ASM211984v1
Sphingomonas sp. KC8	1030157	Proteobacteria	Alphaproteobacteria	63.7	Complete Genome	ftp://ftp.ncbi.nlm.nih.gov/genomes/all/GCA/002/151/445/GCA_002151445.1_ASM215144v1
Yoonia vestfoldensis	245188	Proteobacteria	Alphaproteobacteria	60.6796	Complete Genome	ftp://ftp.ncbi.nlm.nih.gov/genomes/all/GCA/002/158/905/GCA_002158905.1_ASM215890v1
Komagataeibacter europaeus	33995	Proteobacteria	Alphaproteobacteria	61.7094	Complete Genome	ftp://ftp.ncbi.nlm.nih.gov/genomes/all/GCA/002/173/515/GCA_002173515.1_ASM217351v1
Brucella melitensis	29459	Proteobacteria	Alphaproteobacteria	57.2358	Complete Genome	ftp://ftp.ncbi.nlm.nih.gov/genomes/all/GCA/002/191/575/GCA_002191575.1_ASM219157v1
Acetobacter pasteurianus subsp. pasteurianus	481145	Proteobacteria	Alphaproteobacteria	53.3084	Complete Genome	ftp://ftp.ncbi.nlm.nih.gov/genomes/all/GCA/002/202/135/GCA_002202135.1_ASM220213v1
Brevundimonas vesicularis	41276	Proteobacteria	Alphaproteobacteria	66.1	Complete Genome	ftp://ftp.ncbi.nlm.nih.gov/genomes/all/GCA/002/208/825/GCA_002208825.2_ASM220882v2
Anaplasma ovis str. Haibei	1248439	Proteobacteria	Alphaproteobacteria	48.9	Complete Genome	ftp://ftp.ncbi.nlm.nih.gov/genomes/all/GCA/002/214/625/GCA_002214625.2_ASM221462v2
Sphingorhabdus sp. SMR4y	2584094	Proteobacteria	Alphaproteobacteria	58	Complete Genome	ftp://ftp.ncbi.nlm.nih.gov/genomes/all/GCA/002/218/195/GCA_002218195.1_ASM221819v1
Acetobacter oryzifermentans	1633874	Proteobacteria	Alphaproteobacteria	52.8	Complete Genome	ftp://ftp.ncbi.nlm.nih.gov/genomes/all/GCA/002/220/195/GCA_002220195.1_ASM222019v1
Sulfitobacter pseudonitzschiae	1402135	Proteobacteria	Alphaproteobacteria	59.5101	Complete Genome	ftp://ftp.ncbi.nlm.nih.gov/genomes/all/GCA/002/222/635/GCA_002222635.1_ASM222263v1
Antarctobacter heliothermus	74033	Proteobacteria	Alphaproteobacteria	61.5257	Complete Genome	ftp://ftp.ncbi.nlm.nih.gov/genomes/all/GCA/002/237/555/GCA_002237555.1_ASM223755v1
Labrenzia sp. VG12	2021862	Proteobacteria	Alphaproteobacteria	59.9	Complete Genome	ftp://ftp.ncbi.nlm.nih.gov/genomes/all/GCA/002/237/595/GCA_002237595.1_ASM223759v1
Rhizobium leguminosarum bv. viciae	387	Proteobacteria	Alphaproteobacteria	60.5875	Complete Genome	ftp://ftp.ncbi.nlm.nih.gov/genomes/all/GCA/002/243/365/GCA_002243365.1_ASM224336v1
Bradyrhizobium sp. 2 39S1MB	1404768	Proteobacteria	Alphaproteobacteria	64.7	Complete Genome	ftp://ftp.ncbi.nlm.nih.gov/genomes/all/GCA/002/266/435/GCA_002266435.2_ASM226643v2
Bradyrhizobium sp. 3 85S1MB	1404367	Proteobacteria	Alphaproteobacteria	64.3	Complete Genome	ftp://ftp.ncbi.nlm.nih.gov/genomes/all/GCA/002/266/465/GCA_002266465.2_ASM226646v2
Rhizobium sp. 11515TR	2028343	Proteobacteria	Alphaproteobacteria	59.4551	Complete Genome	ftp://ftp.ncbi.nlm.nih.gov/genomes/all/GCA/002/277/895/GCA_002277895.1_ASM227789v1
Bradyrhizobium ottawaense	931866	Proteobacteria	Alphaproteobacteria	63.8	Complete Genome	ftp://ftp.ncbi.nlm.nih.gov/genomes/all/GCA/002/278/135/GCA_002278135.2_ASM227813v2
Rickettsia sp. MEAM1 (Bemisia tabaci)	1182263	Proteobacteria	Alphaproteobacteria	32.5	Complete Genome	ftp://ftp.ncbi.nlm.nih.gov/genomes/all/GCA/002/285/905/GCA_002285905.1_ASM228590v1
Sphingobium hydrophobicum	1673076	Proteobacteria	Alphaproteobacteria	63.1957	Complete Genome	ftp://ftp.ncbi.nlm.nih.gov/genomes/all/GCA/002/288/285/GCA_002288285.1_ASM228828v1
Sinorhizobium fredii CCBAU 83666	1128334	Proteobacteria	Alphaproteobacteria	62.138	Complete Genome	ftp://ftp.ncbi.nlm.nih.gov/genomes/all/GCA/002/288/485/GCA_002288485.1_ASM228848v1
Sinorhizobium sp. CCBAU 05631	794846	Proteobacteria	Alphaproteobacteria	62.3581	Complete Genome	ftp://ftp.ncbi.nlm.nih.gov/genomes/all/GCA/002/288/505/GCA_002288505.1_ASM228850v1
Ensifer sojae CCBAU 05684	716928	Proteobacteria	Alphaproteobacteria	62.0061	Complete Genome	ftp://ftp.ncbi.nlm.nih.gov/genomes/all/GCA/002/288/525/GCA_002288525.1_ASM228852v1
Caulobacter vibrioides	155892	Proteobacteria	Alphaproteobacteria	67.2	Complete Genome	ftp://ftp.ncbi.nlm.nih.gov/genomes/all/GCA/002/310/295/GCA_002310295.2_ASM231029v2
Rhizorhabdus dicambivorans	1850238	Proteobacteria	Alphaproteobacteria	65.3161	Complete Genome	ftp://ftp.ncbi.nlm.nih.gov/genomes/all/GCA/002/355/275/GCA_002355275.1_ASM235527v1
Variibacter gotjawalensis	1333996	Proteobacteria	Alphaproteobacteria	62.2	Complete Genome	ftp://ftp.ncbi.nlm.nih.gov/genomes/all/GCA/002/355/335/GCA_002355335.1_ASM235533v1
Sphingobium cloacae	120107	Proteobacteria	Alphaproteobacteria	64.4911	Complete Genome	ftp://ftp.ncbi.nlm.nih.gov/genomes/all/GCA/002/355/855/GCA_002355855.1_ASM235585v1
Phaeobacter gallaeciensis	60890	Proteobacteria	Alphaproteobacteria	59.4935	Complete Genome	ftp://ftp.ncbi.nlm.nih.gov/genomes/all/GCA/002/381/285/GCA_002381285.1_ASM238128v1
Phaeobacter piscinae	1580596	Proteobacteria	Alphaproteobacteria	60.1034	Complete Genome	ftp://ftp.ncbi.nlm.nih.gov/genomes/all/GCA/002/407/245/GCA_002407245.1_ASM240724v1
Celeribacter ethanolicus	1758178	Proteobacteria	Alphaproteobacteria	61.2679	Complete Genome	ftp://ftp.ncbi.nlm.nih.gov/genomes/all/GCA/002/407/265/GCA_002407265.1_ASM240726v1
Celeribacter manganoxidans	1411902	Proteobacteria	Alphaproteobacteria	64.7772	Complete Genome	ftp://ftp.ncbi.nlm.nih.gov/genomes/all/GCA/002/504/165/GCA_002504165.1_ASM250416v1
Sphingomonas melonis	152682	Proteobacteria	Alphaproteobacteria	67.4	Complete Genome	ftp://ftp.ncbi.nlm.nih.gov/genomes/all/GCA/002/504/265/GCA_002504265.1_ASM250426v1
Rhizobium acidisoli	1538158	Proteobacteria	Alphaproteobacteria	61.0382	Complete Genome	ftp://ftp.ncbi.nlm.nih.gov/genomes/all/GCA/002/531/755/GCA_002531755.2_ASM253175v2
Acetobacter tropicalis	104102	Proteobacteria	Alphaproteobacteria	55.6687	Complete Genome	ftp://ftp.ncbi.nlm.nih.gov/genomes/all/GCA/002/549/835/GCA_002549835.1_ASM254983v1
Agrobacterium tumefaciens	358	Proteobacteria	Alphaproteobacteria	59.4307	Complete Genome	ftp://ftp.ncbi.nlm.nih.gov/genomes/all/GCA/002/591/665/GCA_002591665.2_ASM259166v2
Rhizobium sp. ACO-34A	1571470	Proteobacteria	Alphaproteobacteria	61.2184	Complete Genome	ftp://ftp.ncbi.nlm.nih.gov/genomes/all/GCA/002/600/635/GCA_002600635.1_ASM260063v1
Bartonella henselae	38323	Proteobacteria	Alphaproteobacteria	38.3	Complete Genome	ftp://ftp.ncbi.nlm.nih.gov/genomes/all/GCA/002/735/245/GCA_002735245.1_ASM273524v1
Microvirga ossetica	1882682	Proteobacteria	Alphaproteobacteria	62.6718	Complete Genome	ftp://ftp.ncbi.nlm.nih.gov/genomes/all/GCA/002/741/015/GCA_002741015.1_ASM274101v1
Caulobacter sp. FWC26	69665	Proteobacteria	Alphaproteobacteria	66.711	Complete Genome	ftp://ftp.ncbi.nlm.nih.gov/genomes/all/GCA/002/742/645/GCA_002742645.2_ASM274264v2
Caulobacter mirabilis	69666	Proteobacteria	Alphaproteobacteria	69.3	Complete Genome	ftp://ftp.ncbi.nlm.nih.gov/genomes/all/GCA/002/749/615/GCA_002749615.1_ASM274961v1
Methylosinus trichosporium OB3b	595536	Proteobacteria	Alphaproteobacteria	65.7592	Complete Genome	ftp://ftp.ncbi.nlm.nih.gov/genomes/all/GCA/002/752/655/GCA_002752655.1_ASM275265v1
Roseomonas sp. FDAARGOS_362	2018065	Proteobacteria	Alphaproteobacteria	70.3416	Complete Genome	ftp://ftp.ncbi.nlm.nih.gov/genomes/all/GCA/002/754/815/GCA_002754815.1_ASM275481v1
Komagataeibacter xylinus	28448	Proteobacteria	Alphaproteobacteria	63.3	Complete Genome	ftp://ftp.ncbi.nlm.nih.gov/genomes/all/GCA/002/762/195/GCA_002762195.1_ASM276219v1
Phyllobacterium zundukense	1867719	Proteobacteria	Alphaproteobacteria	57.2475	Complete Genome	ftp://ftp.ncbi.nlm.nih.gov/genomes/all/GCA/002/764/115/GCA_002764115.1_ASM276411v1
Sphingorhabdus sp. YGSMI21	2077182	Proteobacteria	Alphaproteobacteria	57.9015	Complete Genome	ftp://ftp.ncbi.nlm.nih.gov/genomes/all/GCA/002/776/575/GCA_002776575.1_ASM277657v1
Sphingomonas sp. Cra20	1327635	Proteobacteria	Alphaproteobacteria	65.6012	Complete Genome	ftp://ftp.ncbi.nlm.nih.gov/genomes/all/GCA/002/796/605/GCA_002796605.1_ASM279660v1
Bartonella sp. 1-1C	515256	Proteobacteria	Alphaproteobacteria	35.9	Complete Genome	ftp://ftp.ncbi.nlm.nih.gov/genomes/all/GCA/002/810/325/GCA_002810325.1_ASM281032v1
Rhizobium sp. Y9	1914541	Proteobacteria	Alphaproteobacteria	59.1976	Complete Genome	ftp://ftp.ncbi.nlm.nih.gov/genomes/all/GCA/002/814/035/GCA_002814035.1_ASM281403v1
Sagittula sp. P11	2009329	Proteobacteria	Alphaproteobacteria	66.3191	Complete Genome	ftp://ftp.ncbi.nlm.nih.gov/genomes/all/GCA/002/814/095/GCA_002814095.1_ASM281409v1
Bradyrhizobium sp. SK17	2057741	Proteobacteria	Alphaproteobacteria	64.5657	Complete Genome	ftp://ftp.ncbi.nlm.nih.gov/genomes/all/GCA/002/831/585/GCA_002831585.1_ASM283158v1
Thalassospira marina	2048283	Proteobacteria	Alphaproteobacteria	54.6165	Complete Genome	ftp://ftp.ncbi.nlm.nih.gov/genomes/all/GCA/002/844/375/GCA_002844375.1_ASM284437v1
Paracoccus sp. BM15	1529068	Proteobacteria	Alphaproteobacteria	62.1161	Complete Genome	ftp://ftp.ncbi.nlm.nih.gov/genomes/all/GCA/002/847/305/GCA_002847305.1_ASM284730v1
Paracoccus zhejiangensis	1077935	Proteobacteria	Alphaproteobacteria	65.6106	Complete Genome	ftp://ftp.ncbi.nlm.nih.gov/genomes/all/GCA/002/847/445/GCA_002847445.1_ASM284744v1
Rhodobacteraceae bacterium	1904441	Proteobacteria	Alphaproteobacteria	56.805	Complete Genome	ftp://ftp.ncbi.nlm.nih.gov/genomes/all/GCA/002/850/435/GCA_002850435.1_ASM285043v1
Candidatus Hodgkinia cicadicola	573658	Proteobacteria	Alphaproteobacteria	45.6	Complete Genome	ftp://ftp.ncbi.nlm.nih.gov/genomes/all/GCA/002/859/165/GCA_002859165.1_ASM285916v1
Paracoccus sp. CBA4604	2065379	Proteobacteria	Alphaproteobacteria	66.5265	Complete Genome	ftp://ftp.ncbi.nlm.nih.gov/genomes/all/GCA/002/865/605/GCA_002865605.1_ASM286560v1
Niveispirillum cyanobacteriorum	1612173	Proteobacteria	Alphaproteobacteria	63.3958	Complete Genome	ftp://ftp.ncbi.nlm.nih.gov/genomes/all/GCA/002/868/735/GCA_002868735.1_ASM286873v1
Ehrlichia canis	944	Proteobacteria	Alphaproteobacteria	29	Complete Genome	ftp://ftp.ncbi.nlm.nih.gov/genomes/all/GCA/002/879/995/GCA_002879995.1_ASM287999v1
Phaeobacter inhibens	221822	Proteobacteria	Alphaproteobacteria	59.6414	Complete Genome	ftp://ftp.ncbi.nlm.nih.gov/genomes/all/GCA/002/892/225/GCA_002892225.1_ASM289222v1
Rhizobium sp. NXC24	2048897	Proteobacteria	Alphaproteobacteria	59.3722	Complete Genome	ftp://ftp.ncbi.nlm.nih.gov/genomes/all/GCA/002/944/315/GCA_002944315.1_ASM294431v1
Sinorhizobium fredii	380	Proteobacteria	Alphaproteobacteria	62.3103	Complete Genome	ftp://ftp.ncbi.nlm.nih.gov/genomes/all/GCA/002/944/405/GCA_002944405.1_ASM294440v1
Devosia sp. I507	2083786	Proteobacteria	Alphaproteobacteria	61.9	Complete Genome	ftp://ftp.ncbi.nlm.nih.gov/genomes/all/GCA/002/949/085/GCA_002949085.1_ASM294908v1
Porphyrobacter sp. HT-58-2	2023229	Proteobacteria	Alphaproteobacteria	64.3	Complete Genome	ftp://ftp.ncbi.nlm.nih.gov/genomes/all/GCA/002/952/215/GCA_002952215.1_ASM295221v1
Sphingopyxis sp. MG	1866325	Proteobacteria	Alphaproteobacteria	66.4327	Complete Genome	ftp://ftp.ncbi.nlm.nih.gov/genomes/all/GCA/002/953/155/GCA_002953155.1_ASM295315v1
Roseobacter denitrificans	2434	Proteobacteria	Alphaproteobacteria	58.9291	Complete Genome	ftp://ftp.ncbi.nlm.nih.gov/genomes/all/GCA/002/983/865/GCA_002983865.1_ASM298386v1
Magnetospirillum gryphiswaldense MSR-1	431944	Proteobacteria	Alphaproteobacteria	63.2	Complete Genome	ftp://ftp.ncbi.nlm.nih.gov/genomes/all/GCA/002/995/515/GCA_002995515.1_ASM299551v1
Magnetospirillum gryphiswaldense	55518	Proteobacteria	Alphaproteobacteria	63.2	Complete Genome	ftp://ftp.ncbi.nlm.nih.gov/genomes/all/GCA/002/995/535/GCA_002995535.1_ASM299553v1
Phreatobacter cathodiphilus	1868589	Proteobacteria	Alphaproteobacteria	69.3	Complete Genome	ftp://ftp.ncbi.nlm.nih.gov/genomes/all/GCA/003/008/515/GCA_003008515.1_ASM300851v1
Caulobacter segnis	88688	Proteobacteria	Alphaproteobacteria	67.7	Complete Genome	ftp://ftp.ncbi.nlm.nih.gov/genomes/all/GCA/003/015/125/GCA_003015125.1_ASM301512v1
Candidatus Phycorickettsia trachydisci	2115978	Proteobacteria	Alphaproteobacteria	34.1	Complete Genome	ftp://ftp.ncbi.nlm.nih.gov/genomes/all/GCA/003/015/145/GCA_003015145.1_ASM301514v1
Zymomonas mobilis subsp. mobilis	120045	Proteobacteria	Alphaproteobacteria	46.1929	Complete Genome	ftp://ftp.ncbi.nlm.nih.gov/genomes/all/GCA/003/052/045/GCA_003052045.1_ASM305204v1
Gemmobacter sp. HYN0069	2169400	Proteobacteria	Alphaproteobacteria	63.9802	Complete Genome	ftp://ftp.ncbi.nlm.nih.gov/genomes/all/GCA/003/060/865/GCA_003060865.1_ASM306086v1
Rhodobacter blasticus	1075	Proteobacteria	Alphaproteobacteria	66.4219	Complete Genome	ftp://ftp.ncbi.nlm.nih.gov/genomes/all/GCA/003/071/405/GCA_003071405.1_ASM307140v1
Aminobacter sp. MSH1	374606	Proteobacteria	Alphaproteobacteria	63.1347	Complete Genome	ftp://ftp.ncbi.nlm.nih.gov/genomes/all/GCA/003/071/665/GCA_003071665.1_ASM307166v1
Candidatus Fokinia solitaria	1802984	Proteobacteria	Alphaproteobacteria	35.8	Complete Genome	ftp://ftp.ncbi.nlm.nih.gov/genomes/all/GCA/003/072/485/GCA_003072485.1_ASM307248v1
Sinorhizobium fredii CCBAU 45436	1128331	Proteobacteria	Alphaproteobacteria	62.2408	Complete Genome	ftp://ftp.ncbi.nlm.nih.gov/genomes/all/GCA/003/100/575/GCA_003100575.1_ASM310057v1
Yangia pacifica	311180	Proteobacteria	Alphaproteobacteria	66.5328	Complete Genome	ftp://ftp.ncbi.nlm.nih.gov/genomes/all/GCA/003/111/685/GCA_003111685.1_ASM311168v1
Methylobacterium sp. DM1	2067957	Proteobacteria	Alphaproteobacteria	68.2633	Complete Genome	ftp://ftp.ncbi.nlm.nih.gov/genomes/all/GCA/003/111/705/GCA_003111705.1_ASM311170v1
Azospirillum sp. TSH58	664962	Proteobacteria	Alphaproteobacteria	69.1254	Complete Genome	ftp://ftp.ncbi.nlm.nih.gov/genomes/all/GCA/003/119/115/GCA_003119115.1_ASM311911v1
Azospirillum sp. CFH 70021	2202148	Proteobacteria	Alphaproteobacteria	69.8169	Complete Genome	ftp://ftp.ncbi.nlm.nih.gov/genomes/all/GCA/003/130/795/GCA_003130795.1_ASM313079v1
Phenylobacterium sp. HYN0004	2201350	Proteobacteria	Alphaproteobacteria	69.9	Complete Genome	ftp://ftp.ncbi.nlm.nih.gov/genomes/all/GCA/003/150/835/GCA_003150835.1_ASM315083v1
Microvirga sp. 17 mud 1-3	2082949	Proteobacteria	Alphaproteobacteria	64	Complete Genome	ftp://ftp.ncbi.nlm.nih.gov/genomes/all/GCA/003/151/255/GCA_003151255.1_ASM315125v1
Methylobacterium sp. 17SD2-17	2202825	Proteobacteria	Alphaproteobacteria	68.7	Complete Genome	ftp://ftp.ncbi.nlm.nih.gov/genomes/all/GCA/003/173/715/GCA_003173715.1_ASM317371v1
Methylobacterium sp. 17Sr1-43	2202828	Proteobacteria	Alphaproteobacteria	70.4	Complete Genome	ftp://ftp.ncbi.nlm.nih.gov/genomes/all/GCA/003/173/735/GCA_003173735.1_ASM317373v1
Methylobacterium sp. 17Sr1-28	2202827	Proteobacteria	Alphaproteobacteria	71.6	Complete Genome	ftp://ftp.ncbi.nlm.nih.gov/genomes/all/GCA/003/173/755/GCA_003173755.1_ASM317375v1
Methylobacterium sp. 17Sr1-1	2202826	Proteobacteria	Alphaproteobacteria	70.6	Complete Genome	ftp://ftp.ncbi.nlm.nih.gov/genomes/all/GCA/003/173/775/GCA_003173775.1_ASM317377v1
Sinorhizobium fredii CCBAU 25509	1128330	Proteobacteria	Alphaproteobacteria	62.193	Complete Genome	ftp://ftp.ncbi.nlm.nih.gov/genomes/all/GCA/003/177/055/GCA_003177055.1_ASM317705v1
Azospirillum sp. M2T2B2	682998	Proteobacteria	Alphaproteobacteria	67.998	Complete Genome	ftp://ftp.ncbi.nlm.nih.gov/genomes/all/GCA/003/233/655/GCA_003233655.1_ASM323365v1
Methylobacterium sp. XJLW	739141	Proteobacteria	Alphaproteobacteria	69.914	Complete Genome	ftp://ftp.ncbi.nlm.nih.gov/genomes/all/GCA/003/254/375/GCA_003254375.1_ASM325437v1
Erythrobacter sp. KY5	2011159	Proteobacteria	Alphaproteobacteria	60.8	Complete Genome	ftp://ftp.ncbi.nlm.nih.gov/genomes/all/GCA/003/264/115/GCA_003264115.1_ASM326411v1
Paracoccus mutanolyticus	1499308	Proteobacteria	Alphaproteobacteria	67.3	Complete Genome	ftp://ftp.ncbi.nlm.nih.gov/genomes/all/GCA/003/285/265/GCA_003285265.1_ASM328526v1
Roseovarius sp. AK1035	2203213	Proteobacteria	Alphaproteobacteria	60.9739	Complete Genome	ftp://ftp.ncbi.nlm.nih.gov/genomes/all/GCA/003/288/315/GCA_003288315.1_ASM328831v1
Rhizobium leguminosarum	384	Proteobacteria	Alphaproteobacteria	60.5451	Complete Genome	ftp://ftp.ncbi.nlm.nih.gov/genomes/all/GCA/003/290/405/GCA_003290405.1_ASM329040v1
Sphingomonas paucimobilis	13689	Proteobacteria	Alphaproteobacteria	65.7	Complete Genome	ftp://ftp.ncbi.nlm.nih.gov/genomes/all/GCA/003/314/795/GCA_003314795.2_ASM331479v2
Acetobacter sp. JWB	2259883	Proteobacteria	Alphaproteobacteria	52.3991	Complete Genome	ftp://ftp.ncbi.nlm.nih.gov/genomes/all/GCA/003/323/795/GCA_003323795.1_ASM332379v1
Paracoccus sp. SC2-6	2259340	Proteobacteria	Alphaproteobacteria	66.9	Complete Genome	ftp://ftp.ncbi.nlm.nih.gov/genomes/all/GCA/003/324/675/GCA_003324675.1_ASM332467v1
Rhodobacter sphaeroides 2.4.1	272943	Proteobacteria	Alphaproteobacteria	68.7646	Complete Genome	ftp://ftp.ncbi.nlm.nih.gov/genomes/all/GCA/003/324/715/GCA_003324715.1_ASM332471v1
Rhodobiaceae bacterium	2026785	Proteobacteria	Alphaproteobacteria	55.1	Complete Genome	ftp://ftp.ncbi.nlm.nih.gov/genomes/all/GCA/003/330/885/GCA_003330885.1_ASM333088v1
Ruegeria sp. NKC1-1	2099786	Proteobacteria	Alphaproteobacteria	45.2	Complete Genome	ftp://ftp.ncbi.nlm.nih.gov/genomes/all/GCA/003/336/365/GCA_003336365.1_ASM333636v1
Sulfitobacter sp. JL08	2070369	Proteobacteria	Alphaproteobacteria	57.5	Complete Genome	ftp://ftp.ncbi.nlm.nih.gov/genomes/all/GCA/003/352/045/GCA_003352045.1_ASM335204v1
Sulfitobacter sp. SK011	1389004	Proteobacteria	Alphaproteobacteria	56.6	Complete Genome	ftp://ftp.ncbi.nlm.nih.gov/genomes/all/GCA/003/352/065/GCA_003352065.1_ASM335206v1
Sulfitobacter sp. SK012	1389005	Proteobacteria	Alphaproteobacteria	54.8766	Complete Genome	ftp://ftp.ncbi.nlm.nih.gov/genomes/all/GCA/003/352/085/GCA_003352085.1_ASM335208v1
Sulfitobacter sp. SK025	1389011	Proteobacteria	Alphaproteobacteria	60.268	Complete Genome	ftp://ftp.ncbi.nlm.nih.gov/genomes/all/GCA/003/352/105/GCA_003352105.1_ASM335210v1
Sphingomonas sp. FARSPH	2219696	Proteobacteria	Alphaproteobacteria	67.5468	Complete Genome	ftp://ftp.ncbi.nlm.nih.gov/genomes/all/GCA/003/355/005/GCA_003355005.1_ASM335500v1
Erythrobacter sp. YH-07	2182384	Proteobacteria	Alphaproteobacteria	62.0096	Complete Genome	ftp://ftp.ncbi.nlm.nih.gov/genomes/all/GCA/003/355/455/GCA_003355455.1_ASM335545v1
Acetobacter pomorum	65959	Proteobacteria	Alphaproteobacteria	52.5365	Complete Genome	ftp://ftp.ncbi.nlm.nih.gov/genomes/all/GCA/003/391/275/GCA_003391275.1_ASM339127v1
Thalassospira indica	1891279	Proteobacteria	Alphaproteobacteria	54.9	Complete Genome	ftp://ftp.ncbi.nlm.nih.gov/genomes/all/GCA/003/403/095/GCA_003403095.1_ASM340309v1
Blastomonas fulva	1550728	Proteobacteria	Alphaproteobacteria	64.1727	Complete Genome	ftp://ftp.ncbi.nlm.nih.gov/genomes/all/GCA/003/431/825/GCA_003431825.1_ASM343182v1
Breoghania sp. L-A4	2304600	Proteobacteria	Alphaproteobacteria	64.5	Complete Genome	ftp://ftp.ncbi.nlm.nih.gov/genomes/all/GCA/003/432/385/GCA_003432385.1_ASM343238v1
Maritalea myrionectae	454601	Proteobacteria	Alphaproteobacteria	52.4327	Complete Genome	ftp://ftp.ncbi.nlm.nih.gov/genomes/all/GCA/003/433/515/GCA_003433515.1_ASM343351v1
Ruegeria sp. AD91A	2293862	Proteobacteria	Alphaproteobacteria	57.0325	Complete Genome	ftp://ftp.ncbi.nlm.nih.gov/genomes/all/GCA/003/443/535/GCA_003443535.1_ASM344353v1
Phaeobacter sp. LSS9	681157	Proteobacteria	Alphaproteobacteria	60.3117	Complete Genome	ftp://ftp.ncbi.nlm.nih.gov/genomes/all/GCA/003/443/595/GCA_003443595.1_ASM344359v1
Rickettsia japonica	35790	Proteobacteria	Alphaproteobacteria	32.4	Complete Genome	ftp://ftp.ncbi.nlm.nih.gov/genomes/all/GCA/003/454/715/GCA_003454715.1_ASM345471v1
Novosphingobium sp. THN1	1016987	Proteobacteria	Alphaproteobacteria	63.5001	Complete Genome	ftp://ftp.ncbi.nlm.nih.gov/genomes/all/GCA/003/454/795/GCA_003454795.1_ASM345479v1
Neorhizobium sp. SOG26	2060726	Proteobacteria	Alphaproteobacteria	61.1983	Complete Genome	ftp://ftp.ncbi.nlm.nih.gov/genomes/all/GCA/003/491/345/GCA_003491345.1_ASM349134v1
Rhodobacteraceae bacterium BAR1	2171755	Proteobacteria	Alphaproteobacteria	57.4	Complete Genome	ftp://ftp.ncbi.nlm.nih.gov/genomes/all/GCA/003/544/895/GCA_003544895.1_ASM354489v1
Altererythrobacter sp. B11	2060312	Proteobacteria	Alphaproteobacteria	65.4	Complete Genome	ftp://ftp.ncbi.nlm.nih.gov/genomes/all/GCA/003/569/745/GCA_003569745.1_ASM356974v1
Neorhizobium sp. NCHU2750	1825976	Proteobacteria	Alphaproteobacteria	60.2713	Complete Genome	ftp://ftp.ncbi.nlm.nih.gov/genomes/all/GCA/003/597/675/GCA_003597675.1_ASM359767v1
Bartonella sp. OE 1-1	545612	Proteobacteria	Alphaproteobacteria	38.2	Complete Genome	ftp://ftp.ncbi.nlm.nih.gov/genomes/all/GCA/003/606/345/GCA_003606345.2_ASM360634v2
Sphingobium sp. YG1	2082188	Proteobacteria	Alphaproteobacteria	63.099	Complete Genome	ftp://ftp.ncbi.nlm.nih.gov/genomes/all/GCA/003/609/795/GCA_003609795.1_ASM360979v1
Sphingopyxis sp. EG6	1874061	Proteobacteria	Alphaproteobacteria	64.5808	Complete Genome	ftp://ftp.ncbi.nlm.nih.gov/genomes/all/GCA/003/609/815/GCA_003609815.1_ASM360981v1
Sphingopyxis sp. FD7	1914525	Proteobacteria	Alphaproteobacteria	65.1844	Complete Genome	ftp://ftp.ncbi.nlm.nih.gov/genomes/all/GCA/003/609/835/GCA_003609835.1_ASM360983v1
Sulfitobacter sp. D7	1968541	Proteobacteria	Alphaproteobacteria	61.1759	Complete Genome	ftp://ftp.ncbi.nlm.nih.gov/genomes/all/GCA/003/611/275/GCA_003611275.1_ASM361127v1
Rhizobium jaguaris	1312183	Proteobacteria	Alphaproteobacteria	59.4358	Complete Genome	ftp://ftp.ncbi.nlm.nih.gov/genomes/all/GCA/003/627/755/GCA_003627755.1_ASM362775v1
Rhizobium sp. CCGE532	2364272	Proteobacteria	Alphaproteobacteria	59.9992	Complete Genome	ftp://ftp.ncbi.nlm.nih.gov/genomes/all/GCA/003/627/775/GCA_003627775.1_ASM362777v1
Rhizobium sp. CCGE531	2364271	Proteobacteria	Alphaproteobacteria	59.9697	Complete Genome	ftp://ftp.ncbi.nlm.nih.gov/genomes/all/GCA/003/627/795/GCA_003627795.1_ASM362779v1
Sphingomonas sp. YZ-8	2319844	Proteobacteria	Alphaproteobacteria	58.8342	Complete Genome	ftp://ftp.ncbi.nlm.nih.gov/genomes/all/GCA/003/660/165/GCA_003660165.1_ASM366016v1
Agrobacterium fabrum	1176649	Proteobacteria	Alphaproteobacteria	58.9586	Complete Genome	ftp://ftp.ncbi.nlm.nih.gov/genomes/all/GCA/003/667/725/GCA_003667725.1_ASM366772v1
Commensalibacter sp. AMU001	2478912	Proteobacteria	Alphaproteobacteria	37.8652	Complete Genome	ftp://ftp.ncbi.nlm.nih.gov/genomes/all/GCA/003/691/365/GCA_003691365.1_ASM369136v1
Sphingobium yanoikuyae	13690	Proteobacteria	Alphaproteobacteria	64.0562	Complete Genome	ftp://ftp.ncbi.nlm.nih.gov/genomes/all/GCA/003/697/265/GCA_003697265.1_ASM369726v1
Caulobacter flavus	1679497	Proteobacteria	Alphaproteobacteria	69.3	Complete Genome	ftp://ftp.ncbi.nlm.nih.gov/genomes/all/GCA/003/722/335/GCA_003722335.1_ASM372233v1
Methylocystis rosea	173366	Proteobacteria	Alphaproteobacteria	62.4612	Complete Genome	ftp://ftp.ncbi.nlm.nih.gov/genomes/all/GCA/003/855/495/GCA_003855495.1_ASM385549v1
Novosphingobium tardaugens NBRC 16725	1219035	Proteobacteria	Alphaproteobacteria	61.2	Complete Genome	ftp://ftp.ncbi.nlm.nih.gov/genomes/all/GCA/003/860/345/GCA_003860345.1_ASM386034v1
Rickettsiales endosymbiont of Stachyamoeba lipophora	2486578	Proteobacteria	Alphaproteobacteria	33	Complete Genome	ftp://ftp.ncbi.nlm.nih.gov/genomes/all/GCA/003/932/735/GCA_003932735.1_ASM393273v1
Tabrizicola sp. K13M18	2494374	Proteobacteria	Alphaproteobacteria	64.0937	Complete Genome	ftp://ftp.ncbi.nlm.nih.gov/genomes/all/GCA/003/940/805/GCA_003940805.1_ASM394080v1
Mesorhizobium sp. M9A.F.Ca.ET.002.03.1.2	2493668	Proteobacteria	Alphaproteobacteria	62.5	Complete Genome	ftp://ftp.ncbi.nlm.nih.gov/genomes/all/GCA/003/952/365/GCA_003952365.1_ASM395236v1
Mesorhizobium sp. M1D.F.Ca.ET.043.01.1.1	2493669	Proteobacteria	Alphaproteobacteria	63.4	Complete Genome	ftp://ftp.ncbi.nlm.nih.gov/genomes/all/GCA/003/952/385/GCA_003952385.1_ASM395238v1
Mesorhizobium sp. M2A.F.Ca.ET.043.02.1.1	2493670	Proteobacteria	Alphaproteobacteria	63.6	Complete Genome	ftp://ftp.ncbi.nlm.nih.gov/genomes/all/GCA/003/952/405/GCA_003952405.1_ASM395240v1
Mesorhizobium sp. M2A.F.Ca.ET.046.03.2.1	2493674	Proteobacteria	Alphaproteobacteria	63.2	Complete Genome	ftp://ftp.ncbi.nlm.nih.gov/genomes/all/GCA/003/952/425/GCA_003952425.1_ASM395242v1
Mesorhizobium sp. M2A.F.Ca.ET.043.05.1.1	2493671	Proteobacteria	Alphaproteobacteria	63.6	Complete Genome	ftp://ftp.ncbi.nlm.nih.gov/genomes/all/GCA/003/952/445/GCA_003952445.1_ASM395244v1
Mesorhizobium sp. M1B.F.Ca.ET.045.04.1.1	2493673	Proteobacteria	Alphaproteobacteria	63.1	Complete Genome	ftp://ftp.ncbi.nlm.nih.gov/genomes/all/GCA/003/952/465/GCA_003952465.1_ASM395246v1
Mesorhizobium sp. M1E.F.Ca.ET.045.02.1.1	2493672	Proteobacteria	Alphaproteobacteria	63.2	Complete Genome	ftp://ftp.ncbi.nlm.nih.gov/genomes/all/GCA/003/952/485/GCA_003952485.1_ASM395248v1
Mesorhizobium sp. M3A.F.Ca.ET.080.04.2.1	2493676	Proteobacteria	Alphaproteobacteria	63.3	Complete Genome	ftp://ftp.ncbi.nlm.nih.gov/genomes/all/GCA/003/952/525/GCA_003952525.1_ASM395252v1
Bosea sp. Tri-49	1867715	Proteobacteria	Alphaproteobacteria	65.9606	Complete Genome	ftp://ftp.ncbi.nlm.nih.gov/genomes/all/GCA/003/952/665/GCA_003952665.1_ASM395266v1
Alphaproteobacteria bacterium WS11	2341112	Proteobacteria	Alphaproteobacteria	62.3	Complete Genome	ftp://ftp.ncbi.nlm.nih.gov/genomes/all/GCA/003/952/725/GCA_003952725.1_ASM395272v1
Acetobacter orientalis	146474	Proteobacteria	Alphaproteobacteria	52.5001	Complete Genome	ftp://ftp.ncbi.nlm.nih.gov/genomes/all/GCA/003/966/365/GCA_003966365.1_Acetorien_assembly01
Asticcacaulis excentricus	78587	Proteobacteria	Alphaproteobacteria	60.6494	Complete Genome	ftp://ftp.ncbi.nlm.nih.gov/genomes/all/GCA/003/966/695/GCA_003966695.1_ASM396669v1
Blastochloris sp. GI	2233851	Proteobacteria	Alphaproteobacteria	68.3	Complete Genome	ftp://ftp.ncbi.nlm.nih.gov/genomes/all/GCA/003/966/715/GCA_003966715.1_ASM396671v1
Pleomorphomonas sp. SM30	1885025	Proteobacteria	Alphaproteobacteria	71.5788	Complete Genome	ftp://ftp.ncbi.nlm.nih.gov/genomes/all/GCA/003/966/995/GCA_003966995.1_ASM396699v1
Sphingobium amiense	135719	Proteobacteria	Alphaproteobacteria	64.6175	Complete Genome	ftp://ftp.ncbi.nlm.nih.gov/genomes/all/GCA/003/967/075/GCA_003967075.1_ASM396707v1
Sphingosinicella microcystinivorans	335406	Proteobacteria	Alphaproteobacteria	63.9	Complete Genome	ftp://ftp.ncbi.nlm.nih.gov/genomes/all/GCA/003/967/095/GCA_003967095.1_ASM396709v1
Silicimonas algicola	1826607	Proteobacteria	Alphaproteobacteria	65.3	Complete Genome	ftp://ftp.ncbi.nlm.nih.gov/genomes/all/GCA/003/970/735/GCA_003970735.1_ASM397073v1
Glycocaulis alkaliphilus	1434191	Proteobacteria	Alphaproteobacteria	63.4	Complete Genome	ftp://ftp.ncbi.nlm.nih.gov/genomes/all/GCA/004/000/605/GCA_004000605.1_ASM400060v1
Sedimentitalea sp. W43	2483033	Proteobacteria	Alphaproteobacteria	55.8703	Complete Genome	ftp://ftp.ncbi.nlm.nih.gov/genomes/all/GCA/004/006/175/GCA_004006175.1_ASM400617v1
Paracoccus sp. Arc7-R13	2500532	Proteobacteria	Alphaproteobacteria	66.6914	Complete Genome	ftp://ftp.ncbi.nlm.nih.gov/genomes/all/GCA/004/010/775/GCA_004010775.1_ASM401077v1
Acetobacter sp. B6	2500548	Proteobacteria	Alphaproteobacteria	53.0782	Complete Genome	ftp://ftp.ncbi.nlm.nih.gov/genomes/all/GCA/004/014/775/GCA_004014775.2_ASM401477v2
Paracoccus denitrificans	266	Proteobacteria	Alphaproteobacteria	66.7829	Complete Genome	ftp://ftp.ncbi.nlm.nih.gov/genomes/all/GCA/004/063/735/GCA_004063735.1_ASM406373v1
Brevundimonas diminuta	293	Proteobacteria	Alphaproteobacteria	67.4	Complete Genome	ftp://ftp.ncbi.nlm.nih.gov/genomes/all/GCA/004/102/925/GCA_004102925.1_ASM410292v1
Bradyrhizobium guangzhouense	1325095	Proteobacteria	Alphaproteobacteria	63.4344	Complete Genome	ftp://ftp.ncbi.nlm.nih.gov/genomes/all/GCA/004/114/955/GCA_004114955.1_ASM411495v1
Bradyrhizobium guangdongense	1325090	Proteobacteria	Alphaproteobacteria	63.2763	Complete Genome	ftp://ftp.ncbi.nlm.nih.gov/genomes/all/GCA/004/114/975/GCA_004114975.1_ASM411497v1
Sulfitobacter donghicola	421000	Proteobacteria	Alphaproteobacteria	32.6	Complete Genome	ftp://ftp.ncbi.nlm.nih.gov/genomes/all/GCA/004/117/035/GCA_004117035.1_ASM411703v1
Leisingera sp. NJS204	2508307	Proteobacteria	Alphaproteobacteria	61.5836	Complete Genome	ftp://ftp.ncbi.nlm.nih.gov/genomes/all/GCA/004/123/675/GCA_004123675.1_ASM412367v1
Sphingosinicella sp. BN140058	1892855	Proteobacteria	Alphaproteobacteria	65.9999	Complete Genome	ftp://ftp.ncbi.nlm.nih.gov/genomes/all/GCA/004/135/585/GCA_004135585.1_ASM413558v1
Methylovirgula ligni	569860	Proteobacteria	Alphaproteobacteria	62.3	Complete Genome	ftp://ftp.ncbi.nlm.nih.gov/genomes/all/GCA/004/135/935/GCA_004135935.1_ASM413593v1
Mesorhizobium sp. Pch-S	2082387	Proteobacteria	Alphaproteobacteria	62.2	Complete Genome	ftp://ftp.ncbi.nlm.nih.gov/genomes/all/GCA/004/136/315/GCA_004136315.1_ASM413631v1
Wolbachia pipientis wAlbB	1116230	Proteobacteria	Alphaproteobacteria	34.4	Complete Genome	ftp://ftp.ncbi.nlm.nih.gov/genomes/all/GCA/004/171/285/GCA_004171285.1_ASM417128v1
Thalassococcus sp. S3	2017482	Proteobacteria	Alphaproteobacteria	60.9721	Complete Genome	ftp://ftp.ncbi.nlm.nih.gov/genomes/all/GCA/004/216/475/GCA_004216475.1_ASM421647v1
Erythrobacter flavus	192812	Proteobacteria	Alphaproteobacteria	63.9	Complete Genome	ftp://ftp.ncbi.nlm.nih.gov/genomes/all/GCA/004/296/255/GCA_004296255.1_ASM429625v1
Agrobacterium sp. 33MFTa1.1	1279031	Proteobacteria	Alphaproteobacteria	59.1735	Complete Genome	ftp://ftp.ncbi.nlm.nih.gov/genomes/all/GCA/004/328/495/GCA_004328495.1_ASM432849v1
Haematobacter massiliensis	195105	Proteobacteria	Alphaproteobacteria	64.4603	Complete Genome	ftp://ftp.ncbi.nlm.nih.gov/genomes/all/GCA/004/328/555/GCA_004328555.1_ASM432855v1
Roseitalea porphyridii	1852022	Proteobacteria	Alphaproteobacteria	66.6	Complete Genome	ftp://ftp.ncbi.nlm.nih.gov/genomes/all/GCA/004/331/955/GCA_004331955.1_ASM433195v1
Komagataeibacter saccharivorans	265959	Proteobacteria	Alphaproteobacteria	61.3276	Complete Genome	ftp://ftp.ncbi.nlm.nih.gov/genomes/all/GCA/004/348/195/GCA_004348195.1_ASM434819v1
Sphingomonas sp. AAP5	1523415	Proteobacteria	Alphaproteobacteria	65.9095	Complete Genome	ftp://ftp.ncbi.nlm.nih.gov/genomes/all/GCA/004/354/345/GCA_004354345.1_ASM435434v1
Leisingera sp. NJS201	2508306	Proteobacteria	Alphaproteobacteria	61.549	Complete Genome	ftp://ftp.ncbi.nlm.nih.gov/genomes/all/GCA/004/535/885/GCA_004535885.1_ASM453588v1
Beijerinckiaceae bacterium	1978229	Proteobacteria	Alphaproteobacteria	58.9	Complete Genome	ftp://ftp.ncbi.nlm.nih.gov/genomes/all/GCA/004/564/215/GCA_004564215.1_ASM456421v1
Paracoccus sp. 2251	2560053	Proteobacteria	Alphaproteobacteria	66.508	Complete Genome	ftp://ftp.ncbi.nlm.nih.gov/genomes/all/GCA/004/683/865/GCA_004683865.2_ASM468386v2
Brevundimonas sp. MF30-B	2561924	Proteobacteria	Alphaproteobacteria	67.8	Complete Genome	ftp://ftp.ncbi.nlm.nih.gov/genomes/all/GCA/004/683/885/GCA_004683885.1_ASM468388v1
Boseongicola sp. CCM32	2552942	Proteobacteria	Alphaproteobacteria	60.5	Complete Genome	ftp://ftp.ncbi.nlm.nih.gov/genomes/all/GCA/004/751/985/GCA_004751985.1_ASM475198v1
Sphingobium sp. PAMC28499	2565554	Proteobacteria	Alphaproteobacteria	64.5	Complete Genome	ftp://ftp.ncbi.nlm.nih.gov/genomes/all/GCA/004/795/815/GCA_004795815.1_ASM479581v1
Sphingomonas sp. PAMC26645	2565555	Proteobacteria	Alphaproteobacteria	65.2	Complete Genome	ftp://ftp.ncbi.nlm.nih.gov/genomes/all/GCA/004/795/835/GCA_004795835.1_ASM479583v1
Sphingopyxis sp. PAMC25046	2565556	Proteobacteria	Alphaproteobacteria	65	Complete Genome	ftp://ftp.ncbi.nlm.nih.gov/genomes/all/GCA/004/795/895/GCA_004795895.1_ASM479589v1
Wolbachia endosymbiont of Brugia malayi	80849	Proteobacteria	Alphaproteobacteria	34.2	Complete Genome	ftp://ftp.ncbi.nlm.nih.gov/genomes/all/GCA/004/795/935/GCA_004795935.1_ASM479593v1
Wolbachia endosymbiont of Drosophila mauritiana	109663	Proteobacteria	Alphaproteobacteria	34	Complete Genome	ftp://ftp.ncbi.nlm.nih.gov/genomes/all/GCA/004/795/955/GCA_004795955.1_ASM479595v1
Acetobacteraceae bacterium	1909293	Proteobacteria	Alphaproteobacteria	42.6499	Complete Genome	ftp://ftp.ncbi.nlm.nih.gov/genomes/all/GCA/004/843/345/GCA_004843345.1_ASM484334v1
Azospirillum sp. TSH100	652764	Proteobacteria	Alphaproteobacteria	67.3743	Complete Genome	ftp://ftp.ncbi.nlm.nih.gov/genomes/all/GCA/004/923/295/GCA_004923295.1_ASM492329v1
Azospirillum sp. TSA2s	709810	Proteobacteria	Alphaproteobacteria	67.1898	Complete Genome	ftp://ftp.ncbi.nlm.nih.gov/genomes/all/GCA/004/923/315/GCA_004923315.1_ASM492331v1
Phreatobacter stygius	1940610	Proteobacteria	Alphaproteobacteria	66.7	Complete Genome	ftp://ftp.ncbi.nlm.nih.gov/genomes/all/GCA/005/144/885/GCA_005144885.1_ASM514488v1
Sphingomonas sp. W1-2-3	2567938	Proteobacteria	Alphaproteobacteria	65	Complete Genome	ftp://ftp.ncbi.nlm.nih.gov/genomes/all/GCA/005/144/965/GCA_005144965.1_ASM514496v1
Novosphingobium sp. ABRDHK2	2571749	Proteobacteria	Alphaproteobacteria	65.8627	Complete Genome	ftp://ftp.ncbi.nlm.nih.gov/genomes/all/GCA/005/145/025/GCA_005145025.1_ASM514502v1
Agrobacterium larrymoorei	160699	Proteobacteria	Alphaproteobacteria	57.2093	Complete Genome	ftp://ftp.ncbi.nlm.nih.gov/genomes/all/GCA/005/145/045/GCA_005145045.1_ASM514504v1
Rhizobium pusense	648995	Proteobacteria	Alphaproteobacteria	59.2477	Complete Genome	ftp://ftp.ncbi.nlm.nih.gov/genomes/all/GCA/005/221/365/GCA_005221365.1_ASM522136v1
Pseudorhodobacter sp. S12M18	2500533	Proteobacteria	Alphaproteobacteria	57.7851	Complete Genome	ftp://ftp.ncbi.nlm.nih.gov/genomes/all/GCA/005/234/135/GCA_005234135.1_ASM523413v1
Rhodobacter sphaeroides	1063	Proteobacteria	Alphaproteobacteria	69.1338	Complete Genome	ftp://ftp.ncbi.nlm.nih.gov/genomes/all/GCA/005/311/585/GCA_005311585.1_ASM531158v1
Brevundimonas sp. SGAir0440	2579977	Proteobacteria	Alphaproteobacteria	66.2	Complete Genome	ftp://ftp.ncbi.nlm.nih.gov/genomes/all/GCA/005/484/585/GCA_005484585.1_ASM548458v1
Rickettsia parkeri	35792	Proteobacteria	Alphaproteobacteria	32.4	Complete Genome	ftp://ftp.ncbi.nlm.nih.gov/genomes/all/GCA/005/549/115/GCA_005549115.1_ASM554911v1
Rhodobacteraceae bacterium D4M1	2579971	Proteobacteria	Alphaproteobacteria	70.1162	Complete Genome	ftp://ftp.ncbi.nlm.nih.gov/genomes/all/GCA/005/887/635/GCA_005887635.2_ASM588763v2
Bradyrhizobium sp. KBS0727	2578114	Proteobacteria	Alphaproteobacteria	62.7	Complete Genome	ftp://ftp.ncbi.nlm.nih.gov/genomes/all/GCA/005/937/885/GCA_005937885.2_ASM593788v2
Bradyrhizobium sp. KBS0725	2578113	Proteobacteria	Alphaproteobacteria	62.7	Complete Genome	ftp://ftp.ncbi.nlm.nih.gov/genomes/all/GCA/005/937/905/GCA_005937905.2_ASM593790v2
Mesorhizobium sp. 8	2584466	Proteobacteria	Alphaproteobacteria	65.2	Complete Genome	ftp://ftp.ncbi.nlm.nih.gov/genomes/all/GCA/006/351/905/GCA_006351905.1_ASM635190v1
Oceanicola sp. D3	2587163	Proteobacteria	Alphaproteobacteria	64.5	Complete Genome	ftp://ftp.ncbi.nlm.nih.gov/genomes/all/GCA/006/351/965/GCA_006351965.1_ASM635196v1
Sphingobium fuliginis ATCC 27551	1208342	Proteobacteria	Alphaproteobacteria	64.3715	Complete Genome	ftp://ftp.ncbi.nlm.nih.gov/genomes/all/GCA/006/363/875/GCA_006363875.1_ASM636387v1
Emcibacter congregatus	2043170	Proteobacteria	Alphaproteobacteria	51.5	Complete Genome	ftp://ftp.ncbi.nlm.nih.gov/genomes/all/GCA/006/385/135/GCA_006385135.1_ASM638513v1
Bradyrhizobium sp. 3	1179474	Proteobacteria	Alphaproteobacteria	64.3	Complete Genome	ftp://ftp.ncbi.nlm.nih.gov/genomes/all/GCA/006/459/165/GCA_006459165.1_ASM645916v1
Labrenzia sp. PHM005	2590016	Proteobacteria	Alphaproteobacteria	54.9796	Complete Genome	ftp://ftp.ncbi.nlm.nih.gov/genomes/all/GCA/006/517/275/GCA_006517275.1_ASM651727v1
Rhizobium sp. NIBRBAC000502774	2590777	Proteobacteria	Alphaproteobacteria	58.3376	Complete Genome	ftp://ftp.ncbi.nlm.nih.gov/genomes/all/GCA/006/517/835/GCA_006517835.1_ASM651783v1
Wolbachia endosymbiont of Carposina sasakii	2591635	Proteobacteria	Alphaproteobacteria	35	Complete Genome	ftp://ftp.ncbi.nlm.nih.gov/genomes/all/GCA/006/542/295/GCA_006542295.1_ASM654229v1
Neokomagataea tanensis	661191	Proteobacteria	Alphaproteobacteria	51.9574	Complete Genome	ftp://ftp.ncbi.nlm.nih.gov/genomes/all/GCA/006/542/335/GCA_006542335.1_ASM654233v1
Swingsia samuiensis	1293412	Proteobacteria	Alphaproteobacteria	45.1083	Complete Genome	ftp://ftp.ncbi.nlm.nih.gov/genomes/all/GCA/006/542/355/GCA_006542355.1_ASM654235v1
Neokomagataea sp. Ha5	2558360	Proteobacteria	Alphaproteobacteria	61.5566	Complete Genome	ftp://ftp.ncbi.nlm.nih.gov/genomes/all/GCA/006/542/375/GCA_006542375.1_ASM654237v1
Porphyrobacter sp. YT40	2547601	Proteobacteria	Alphaproteobacteria	65.8099	Complete Genome	ftp://ftp.ncbi.nlm.nih.gov/genomes/all/GCA/006/542/605/GCA_006542605.1_ASM654260v1
Brevundimonas sp. M20	2591463	Proteobacteria	Alphaproteobacteria	67.6	Complete Genome	ftp://ftp.ncbi.nlm.nih.gov/genomes/all/GCA/006/547/065/GCA_006547065.1_ASM654706v1
Stella humosa	94	Proteobacteria	Alphaproteobacteria	69.8	Complete Genome	ftp://ftp.ncbi.nlm.nih.gov/genomes/all/GCA/006/738/645/GCA_006738645.1_ASM673864v1
Stella sp. ATCC 35155	2558175	Proteobacteria	Alphaproteobacteria	70.6	Complete Genome	ftp://ftp.ncbi.nlm.nih.gov/genomes/all/GCA/006/738/865/GCA_006738865.1_ASM673886v1
Stella vacuolata	217070	Proteobacteria	Alphaproteobacteria	70.9	Complete Genome	ftp://ftp.ncbi.nlm.nih.gov/genomes/all/GCA/006/739/055/GCA_006739055.1_ASM673905v1
Methylorubrum populi	223967	Proteobacteria	Alphaproteobacteria	69.4	Complete Genome	ftp://ftp.ncbi.nlm.nih.gov/genomes/all/GCA/006/740/745/GCA_006740745.1_ASM674074v1
Leisingera aquaemixtae	1396826	Proteobacteria	Alphaproteobacteria	64.513	Complete Genome	ftp://ftp.ncbi.nlm.nih.gov/genomes/all/GCA/006/740/765/GCA_006740765.1_ASM674076v1
Rhodopseudomonas palustris	1076	Proteobacteria	Alphaproteobacteria	65.8	Complete Genome	ftp://ftp.ncbi.nlm.nih.gov/genomes/all/GCA/007/005/445/GCA_007005445.1_ASM700544v1
Ferrovibrio sp. K5	2594003	Proteobacteria	Alphaproteobacteria	63.6	Complete Genome	ftp://ftp.ncbi.nlm.nih.gov/genomes/all/GCA/007/197/755/GCA_007197755.1_ASM719775v1
Bradyrhizobium sp. 58S1	1404864	Proteobacteria	Alphaproteobacteria	64.3	Complete Genome	ftp://ftp.ncbi.nlm.nih.gov/genomes/all/GCA/007/290/395/GCA_007290395.1_ASM729039v1
Sphingomonas sp. XS-10	2599297	Proteobacteria	Alphaproteobacteria	65.5	Complete Genome	ftp://ftp.ncbi.nlm.nih.gov/genomes/all/GCA/007/833/215/GCA_007833215.1_ASM783321v1
Litoreibacter sp. LN3S51	2599296	Proteobacteria	Alphaproteobacteria	59.0732	Complete Genome	ftp://ftp.ncbi.nlm.nih.gov/genomes/all/GCA/007/855/645/GCA_007855645.1_ASM785564v1
Sphingomonas sp. HKS19	1813879	Proteobacteria	Alphaproteobacteria	65.1	Complete Genome	ftp://ftp.ncbi.nlm.nih.gov/genomes/all/GCA/007/859/635/GCA_007859635.1_ASM785963v1
Devosia sp. Gsoil 520	2599292	Proteobacteria	Alphaproteobacteria	63.7	Complete Genome	ftp://ftp.ncbi.nlm.nih.gov/genomes/all/GCA/007/859/655/GCA_007859655.1_ASM785965v1
Novosphingobium ginsenosidimutans	1176536	Proteobacteria	Alphaproteobacteria	64.3	Complete Genome	ftp://ftp.ncbi.nlm.nih.gov/genomes/all/GCA/007/954/425/GCA_007954425.1_ASM795442v1
Wolbachia pipientis	955	Proteobacteria	Alphaproteobacteria	35.2	Complete Genome	ftp://ftp.ncbi.nlm.nih.gov/genomes/all/GCA/007/972/595/GCA_007972595.1_ASM797259v1
Rickettsia asiatica	238800	Proteobacteria	Alphaproteobacteria	32.379	Complete Genome	ftp://ftp.ncbi.nlm.nih.gov/genomes/all/GCA/007/989/425/GCA_007989425.1_ASM798942v1
Wolbachia endosymbiont of Drosophila ananassae	307502	Proteobacteria	Alphaproteobacteria	35.2	Complete Genome	ftp://ftp.ncbi.nlm.nih.gov/genomes/all/GCA/008/033/215/GCA_008033215.1_ASM803321v1
Octadecabacter sp. SW4	2602067	Proteobacteria	Alphaproteobacteria	59.9969	Complete Genome	ftp://ftp.ncbi.nlm.nih.gov/genomes/all/GCA/008/065/155/GCA_008065155.1_ASM806515v1
Acetobacter sp. KACC 21233	2592655	Proteobacteria	Alphaproteobacteria	59.2234	Complete Genome	ftp://ftp.ncbi.nlm.nih.gov/genomes/all/GCA/008/365/315/GCA_008365315.1_ASM836531v1
Brucella vulpis	981386	Proteobacteria	Alphaproteobacteria	57.1328	Complete Genome	ftp://ftp.ncbi.nlm.nih.gov/genomes/all/GCA/900/000/005/GCA_900000005.1_BVF60
Paracoccus aminovorans	34004	Proteobacteria	Alphaproteobacteria	67.3846	Complete Genome	ftp://ftp.ncbi.nlm.nih.gov/genomes/all/GCA/900/005/615/GCA_900005615.1_JCM7685
Bradyrhizobium sp.	376	Proteobacteria	Alphaproteobacteria	63.8	Complete Genome	ftp://ftp.ncbi.nlm.nih.gov/genomes/all/GCA/900/011/245/GCA_900011245.1_BF49.v1
uncultured Sphingopyxis sp.	310581	Proteobacteria	Alphaproteobacteria	65.9	Complete Genome	ftp://ftp.ncbi.nlm.nih.gov/genomes/all/GCA/900/078/365/GCA_900078365.1_SPPYR_PRJEB13037v1
Brucella sp. 10RB9215	1149953	Proteobacteria	Alphaproteobacteria	57.1733	Complete Genome	ftp://ftp.ncbi.nlm.nih.gov/genomes/all/GCA/900/092/405/GCA_900092405.1_10RB9215v1
Brucella sp. 141012304	1885919	Proteobacteria	Alphaproteobacteria	57.1623	Complete Genome	ftp://ftp.ncbi.nlm.nih.gov/genomes/all/GCA/900/095/155/GCA_900095155.1_BR141012304v1
Bradyrhizobium sp. ORS 285	115808	Proteobacteria	Alphaproteobacteria	65.2	Complete Genome	ftp://ftp.ncbi.nlm.nih.gov/genomes/all/GCA/900/176/205/GCA_900176205.1_BRAD285_PRJEB202261_v1
Hartmannibacter diazotrophicus	1482074	Proteobacteria	Alphaproteobacteria	63.99	Complete Genome	ftp://ftp.ncbi.nlm.nih.gov/genomes/all/GCA/900/231/165/GCA_900231165.1_HDIA1
Methylorubrum extorquens	408	Proteobacteria	Alphaproteobacteria	68.3	Complete Genome	ftp://ftp.ncbi.nlm.nih.gov/genomes/all/GCA/900/234/795/GCA_900234795.1_TK0001_PRJEB23178_v1
Bradyrhizobium sp. ORS 3257	167468	Proteobacteria	Alphaproteobacteria	63.3	Complete Genome	ftp://ftp.ncbi.nlm.nih.gov/genomes/all/GCA/900/324/035/GCA_900324035.1_BRAD3257
Orientia tsutsugamushi str. Gilliam	1359184	Proteobacteria	Alphaproteobacteria	30.5	Complete Genome	ftp://ftp.ncbi.nlm.nih.gov/genomes/all/GCA/900/327/245/GCA_900327245.1_Gilliam
Orientia tsutsugamushi	784	Proteobacteria	Alphaproteobacteria	30.6	Complete Genome	ftp://ftp.ncbi.nlm.nih.gov/genomes/all/GCA/900/377/405/GCA_900377405.1_TA686
Bartonella quintana	803	Proteobacteria	Alphaproteobacteria	38.8	Complete Genome	ftp://ftp.ncbi.nlm.nih.gov/genomes/all/GCA/900/475/345/GCA_900475345.1_42731_H01
Epibacterium mobile	379347	Proteobacteria	Alphaproteobacteria	59.056	Complete Genome	ftp://ftp.ncbi.nlm.nih.gov/genomes/all/GCA/900/574/125/GCA_900574125.1_EPIB_assembly_I
Bartonella elizabethae	807	Proteobacteria	Alphaproteobacteria	38.4	Complete Genome	ftp://ftp.ncbi.nlm.nih.gov/genomes/all/GCA/900/638/615/GCA_900638615.1_58174_F01
Bartonella vinsonii	33047	Proteobacteria	Alphaproteobacteria	39.1	Complete Genome	ftp://ftp.ncbi.nlm.nih.gov/genomes/all/GCA/900/638/635/GCA_900638635.1_58174_G01
Methylocella tundrae	227605	Proteobacteria	Alphaproteobacteria	61.7858	Complete Genome	ftp://ftp.ncbi.nlm.nih.gov/genomes/all/GCA/900/749/825/GCA_900749825.1_MTUNDRAET4_v1
Brevundimonas vancanneytii	1325724	Proteobacteria	Alphaproteobacteria	67.3	Complete Genome	ftp://ftp.ncbi.nlm.nih.gov/genomes/all/GCA/901/421/975/GCA_901421975.1_34410_D01
Neisseria gonorrhoeae FA 1090	242231	Proteobacteria	Betaproteobacteria	52.7	Complete Genome	ftp://ftp.ncbi.nlm.nih.gov/genomes/all/GCA/000/006/845/GCA_000006845.1_ASM684v1
Chromobacterium violaceum ATCC 12472	243365	Proteobacteria	Betaproteobacteria	64.8	Complete Genome	ftp://ftp.ncbi.nlm.nih.gov/genomes/all/GCA/000/007/705/GCA_000007705.1_ASM770v1
Neisseria meningitidis MC58	122586	Proteobacteria	Betaproteobacteria	51.5	Complete Genome	ftp://ftp.ncbi.nlm.nih.gov/genomes/all/GCA/000/008/805/GCA_000008805.1_ASM880v1
Neisseria meningitidis Z2491	122587	Proteobacteria	Betaproteobacteria	51.8	Complete Genome	ftp://ftp.ncbi.nlm.nih.gov/genomes/all/GCA/000/009/105/GCA_000009105.1_ASM910v1
Ralstonia solanacearum GMI1000	267608	Proteobacteria	Betaproteobacteria	66.964	Complete Genome	ftp://ftp.ncbi.nlm.nih.gov/genomes/all/GCA/000/009/125/GCA_000009125.1_ASM912v1
Nitrosomonas europaea ATCC 19718	228410	Proteobacteria	Betaproteobacteria	50.7	Complete Genome	ftp://ftp.ncbi.nlm.nih.gov/genomes/all/GCA/000/009/145/GCA_000009145.1_ASM914v1
Neisseria meningitidis FAM18	272831	Proteobacteria	Betaproteobacteria	51.6	Complete Genome	ftp://ftp.ncbi.nlm.nih.gov/genomes/all/GCA/000/009/465/GCA_000009465.1_ASM946v1
Burkholderia cenocepacia J2315	216591	Proteobacteria	Betaproteobacteria	66.9165	Complete Genome	ftp://ftp.ncbi.nlm.nih.gov/genomes/all/GCA/000/009/485/GCA_000009485.1_ASM948v1
Burkholderia mallei ATCC 23344	243160	Proteobacteria	Betaproteobacteria	68.5188	Complete Genome	ftp://ftp.ncbi.nlm.nih.gov/genomes/all/GCA/000/011/705/GCA_000011705.1_ASM1170v1
Dechloromonas aromatica RCB	159087	Proteobacteria	Betaproteobacteria	59.2	Complete Genome	ftp://ftp.ncbi.nlm.nih.gov/genomes/all/GCA/000/012/425/GCA_000012425.1_ASM1242v1
Thiobacillus denitrificans ATCC 25259	292415	Proteobacteria	Betaproteobacteria	66.1	Complete Genome	ftp://ftp.ncbi.nlm.nih.gov/genomes/all/GCA/000/012/745/GCA_000012745.1_ASM1274v1
Burkholderia pseudomallei 1710b	320372	Proteobacteria	Betaproteobacteria	67.9918	Complete Genome	ftp://ftp.ncbi.nlm.nih.gov/genomes/all/GCA/000/012/785/GCA_000012785.1_ASM1278v1
Rhodoferax ferrireducens T118	338969	Proteobacteria	Betaproteobacteria	59.6151	Complete Genome	ftp://ftp.ncbi.nlm.nih.gov/genomes/all/GCA/000/013/605/GCA_000013605.1_ASM1360v1
Janthinobacterium sp. Marseille	375286	Proteobacteria	Betaproteobacteria	54.2	Complete Genome	ftp://ftp.ncbi.nlm.nih.gov/genomes/all/GCA/000/013/625/GCA_000013625.1_ASM1362v1
Methylobacillus flagellatus KT	265072	Proteobacteria	Betaproteobacteria	55.7	Complete Genome	ftp://ftp.ncbi.nlm.nih.gov/genomes/all/GCA/000/013/705/GCA_000013705.1_ASM1370v1
Polaromonas sp. JS666	296591	Proteobacteria	Betaproteobacteria	61.9974	Complete Genome	ftp://ftp.ncbi.nlm.nih.gov/genomes/all/GCA/000/013/865/GCA_000013865.1_ASM1386v1
Burkholderia cenocepacia AU 1054	331271	Proteobacteria	Betaproteobacteria	66.9164	Complete Genome	ftp://ftp.ncbi.nlm.nih.gov/genomes/all/GCA/000/014/085/GCA_000014085.1_ASM1408v1
Neisseria meningitidis 053442	374833	Proteobacteria	Betaproteobacteria	51.7	Complete Genome	ftp://ftp.ncbi.nlm.nih.gov/genomes/all/GCA/000/014/105/GCA_000014105.1_ASM1410v1
Nitrosomonas eutropha C91	335283	Proteobacteria	Betaproteobacteria	48.5544	Complete Genome	ftp://ftp.ncbi.nlm.nih.gov/genomes/all/GCA/000/014/765/GCA_000014765.1_ASM1476v1
Acidovorax citrulli AAC00-1	397945	Proteobacteria	Betaproteobacteria	68.5	Complete Genome	ftp://ftp.ncbi.nlm.nih.gov/genomes/all/GCA/000/015/325/GCA_000015325.1_ASM1532v1
Burkholderia mallei SAVP1	320388	Proteobacteria	Betaproteobacteria	68.3653	Complete Genome	ftp://ftp.ncbi.nlm.nih.gov/genomes/all/GCA/000/015/465/GCA_000015465.1_ASM1546v1
Polaromonas naphthalenivorans CJ2	365044	Proteobacteria	Betaproteobacteria	61.6566	Complete Genome	ftp://ftp.ncbi.nlm.nih.gov/genomes/all/GCA/000/015/505/GCA_000015505.1_ASM1550v1
Acidovorax sp. JS42	232721	Proteobacteria	Betaproteobacteria	66.1144	Complete Genome	ftp://ftp.ncbi.nlm.nih.gov/genomes/all/GCA/000/015/545/GCA_000015545.1_ASM1554v1
Verminephrobacter eiseniae EF01-2	391735	Proteobacteria	Betaproteobacteria	65.2627	Complete Genome	ftp://ftp.ncbi.nlm.nih.gov/genomes/all/GCA/000/015/565/GCA_000015565.1_ASM1556v1
Burkholderia mallei NCTC 10229	412022	Proteobacteria	Betaproteobacteria	68.4784	Complete Genome	ftp://ftp.ncbi.nlm.nih.gov/genomes/all/GCA/000/015/605/GCA_000015605.1_ASM1560v1
Methylibium petroleiphilum PM1	420662	Proteobacteria	Betaproteobacteria	68.7869	Complete Genome	ftp://ftp.ncbi.nlm.nih.gov/genomes/all/GCA/000/015/725/GCA_000015725.1_ASM1572v1
Burkholderia pseudomallei 668	320373	Proteobacteria	Betaproteobacteria	68.2665	Complete Genome	ftp://ftp.ncbi.nlm.nih.gov/genomes/all/GCA/000/015/905/GCA_000015905.1_ASM1590v1
Burkholderia pseudomallei 1106a	357348	Proteobacteria	Betaproteobacteria	68.2624	Complete Genome	ftp://ftp.ncbi.nlm.nih.gov/genomes/all/GCA/000/015/925/GCA_000015925.1_ASM1592v1
Burkholderia vietnamiensis G4	269482	Proteobacteria	Betaproteobacteria	65.7274	Complete Genome	ftp://ftp.ncbi.nlm.nih.gov/genomes/all/GCA/000/016/205/GCA_000016205.1_ASM1620v1
Polynucleobacter asymbioticus QLW-P1DMWA-1	312153	Proteobacteria	Betaproteobacteria	44.8	Complete Genome	ftp://ftp.ncbi.nlm.nih.gov/genomes/all/GCA/000/016/345/GCA_000016345.1_ASM1634v1
Burkholderia multivorans ATCC 17616	395019	Proteobacteria	Betaproteobacteria	66.6924	Complete Genome	ftp://ftp.ncbi.nlm.nih.gov/genomes/all/GCA/000/018/505/GCA_000018505.1_ASM1850v1
Delftia acidovorans SPH-1	398578	Proteobacteria	Betaproteobacteria	66.5	Complete Genome	ftp://ftp.ncbi.nlm.nih.gov/genomes/all/GCA/000/018/665/GCA_000018665.1_ASM1866v1
Burkholderia cenocepacia MC0-3	406425	Proteobacteria	Betaproteobacteria	66.5829	Complete Genome	ftp://ftp.ncbi.nlm.nih.gov/genomes/all/GCA/000/019/505/GCA_000019505.1_ASM1950v1
Polynucleobacter necessarius STIR1	452638	Proteobacteria	Betaproteobacteria	45.6	Complete Genome	ftp://ftp.ncbi.nlm.nih.gov/genomes/all/GCA/000/019/745/GCA_000019745.1_ASM1974v1
Leptothrix cholodnii SP-6	395495	Proteobacteria	Betaproteobacteria	68.9	Complete Genome	ftp://ftp.ncbi.nlm.nih.gov/genomes/all/GCA/000/019/785/GCA_000019785.1_ASM1978v1
Burkholderia ambifaria MC40-6	398577	Proteobacteria	Betaproteobacteria	66.3825	Complete Genome	ftp://ftp.ncbi.nlm.nih.gov/genomes/all/GCA/000/019/925/GCA_000019925.1_ASM1992v1
Paraburkholderia phymatum STM815	391038	Proteobacteria	Betaproteobacteria	62.2803	Complete Genome	ftp://ftp.ncbi.nlm.nih.gov/genomes/all/GCA/000/020/045/GCA_000020045.1_ASM2004v1
Neisseria gonorrhoeae NCCP11945	521006	Proteobacteria	Betaproteobacteria	52.3983	Complete Genome	ftp://ftp.ncbi.nlm.nih.gov/genomes/all/GCA/000/020/105/GCA_000020105.1_ASM2010v1
Paraburkholderia phytofirmans PsJN	398527	Proteobacteria	Betaproteobacteria	62.3159	Complete Genome	ftp://ftp.ncbi.nlm.nih.gov/genomes/all/GCA/000/020/125/GCA_000020125.1_ASM2012v1
Ralstonia pickettii 12J	402626	Proteobacteria	Betaproteobacteria	63.6234	Complete Genome	ftp://ftp.ncbi.nlm.nih.gov/genomes/all/GCA/000/020/205/GCA_000020205.1_ASM2020v1
Laribacter hongkongensis HLHK9	557598	Proteobacteria	Betaproteobacteria	62.4	Complete Genome	ftp://ftp.ncbi.nlm.nih.gov/genomes/all/GCA/000/021/025/GCA_000021025.1_ASM2102v1
Thauera sp. MZ1T	85643	Proteobacteria	Betaproteobacteria	68.2955	Complete Genome	ftp://ftp.ncbi.nlm.nih.gov/genomes/all/GCA/000/021/765/GCA_000021765.1_ASM2176v1
Acidovorax ebreus TPSY	535289	Proteobacteria	Betaproteobacteria	66.8	Complete Genome	ftp://ftp.ncbi.nlm.nih.gov/genomes/all/GCA/000/022/305/GCA_000022305.1_ASM2230v1
Burkholderia glumae BGR1	626418	Proteobacteria	Betaproteobacteria	67.9346	Complete Genome	ftp://ftp.ncbi.nlm.nih.gov/genomes/all/GCA/000/022/645/GCA_000022645.2_ASM2264v1
Variovorax paradoxus S110	543728	Proteobacteria	Betaproteobacteria	67.4998	Complete Genome	ftp://ftp.ncbi.nlm.nih.gov/genomes/all/GCA/000/023/345/GCA_000023345.1_ASM2334v1
Ralstonia pickettii 12D	428406	Proteobacteria	Betaproteobacteria	63.3352	Complete Genome	ftp://ftp.ncbi.nlm.nih.gov/genomes/all/GCA/000/023/425/GCA_000023425.1_ASM2342v1
Methylotenera mobilis JLW8	583345	Proteobacteria	Betaproteobacteria	45.5	Complete Genome	ftp://ftp.ncbi.nlm.nih.gov/genomes/all/GCA/000/023/705/GCA_000023705.1_ASM2370v1
Methylovorus glucosetrophus SIP3-4	582744	Proteobacteria	Betaproteobacteria	54.6472	Complete Genome	ftp://ftp.ncbi.nlm.nih.gov/genomes/all/GCA/000/023/745/GCA_000023745.1_ASM2374v1
Candidatus Accumulibacter phosphatis clade IIA str. UW-1	522306	Proteobacteria	Betaproteobacteria	63.9598	Complete Genome	ftp://ftp.ncbi.nlm.nih.gov/genomes/all/GCA/000/024/165/GCA_000024165.1_ASM2416v1
Sideroxydans lithotrophicus ES-1	580332	Proteobacteria	Betaproteobacteria	57.5	Complete Genome	ftp://ftp.ncbi.nlm.nih.gov/genomes/all/GCA/000/025/705/GCA_000025705.1_ASM2570v1
Aromatoleum aromaticum EbN1	76114	Proteobacteria	Betaproteobacteria	64.6764	Complete Genome	ftp://ftp.ncbi.nlm.nih.gov/genomes/all/GCA/000/025/965/GCA_000025965.1_ASM2596v1
Herminiimonas arsenicoxydans	204773	Proteobacteria	Betaproteobacteria	54.3	Complete Genome	ftp://ftp.ncbi.nlm.nih.gov/genomes/all/GCA/000/026/125/GCA_000026125.1_ASM2612v1
Neisseria meningitidis 8013	604162	Proteobacteria	Betaproteobacteria	51.4	Complete Genome	ftp://ftp.ncbi.nlm.nih.gov/genomes/all/GCA/000/026/965/GCA_000026965.1_ASM2696v1
Azoarcus sp. BH72	62928	Proteobacteria	Betaproteobacteria	67.9	Complete Genome	ftp://ftp.ncbi.nlm.nih.gov/genomes/all/GCA/000/061/505/GCA_000061505.1_ASM6150v1
Bordetella petrii	94624	Proteobacteria	Betaproteobacteria	65.5	Complete Genome	ftp://ftp.ncbi.nlm.nih.gov/genomes/all/GCA/000/067/205/GCA_000067205.1_ASM6720v1
Bordetella avium 197N	360910	Proteobacteria	Betaproteobacteria	61.6	Complete Genome	ftp://ftp.ncbi.nlm.nih.gov/genomes/all/GCA/000/070/465/GCA_000070465.1_ASM7046v1
Neisseria meningitidis alpha14	662598	Proteobacteria	Betaproteobacteria	51.9	Complete Genome	ftp://ftp.ncbi.nlm.nih.gov/genomes/all/GCA/000/083/565/GCA_000083565.1_ASM8356v1
Thiomonas intermedia K12	75379	Proteobacteria	Betaproteobacteria	63.8464	Complete Genome	ftp://ftp.ncbi.nlm.nih.gov/genomes/all/GCA/000/092/605/GCA_000092605.1_ASM9260v1
Paraburkholderia sp. CCGE1002	640511	Proteobacteria	Betaproteobacteria	63.2559	Complete Genome	ftp://ftp.ncbi.nlm.nih.gov/genomes/all/GCA/000/092/885/GCA_000092885.1_ASM9288v1
Methylotenera versatilis 301	666681	Proteobacteria	Betaproteobacteria	42.6	Complete Genome	ftp://ftp.ncbi.nlm.nih.gov/genomes/all/GCA/000/093/025/GCA_000093025.1_ASM9302v1
Comamonas thiooxydans	363952	Proteobacteria	Betaproteobacteria	61.4	Complete Genome	ftp://ftp.ncbi.nlm.nih.gov/genomes/all/GCA/000/093/145/GCA_000093145.2_ASM9314v2
Herbaspirillum seropedicae SmR1	757424	Proteobacteria	Betaproteobacteria	63.4	Complete Genome	ftp://ftp.ncbi.nlm.nih.gov/genomes/all/GCA/000/143/225/GCA_000143225.1_ASM14322v1
Gallionella capsiferriformans ES-2	395494	Proteobacteria	Betaproteobacteria	52.8	Complete Genome	ftp://ftp.ncbi.nlm.nih.gov/genomes/all/GCA/000/145/255/GCA_000145255.1_ASM14525v1
Candidatus Zinderia insecticola CARI	871271	Proteobacteria	Betaproteobacteria	13.5	Complete Genome	ftp://ftp.ncbi.nlm.nih.gov/genomes/all/GCA/000/147/015/GCA_000147015.1_ASM14701v1
Burkholderia sp. CCGE1003	640512	Proteobacteria	Betaproteobacteria	63.2315	Complete Genome	ftp://ftp.ncbi.nlm.nih.gov/genomes/all/GCA/000/148/685/GCA_000148685.1_ASM14868v1
Neisseria meningitidis alpha710	630588	Proteobacteria	Betaproteobacteria	51.7	Complete Genome	ftp://ftp.ncbi.nlm.nih.gov/genomes/all/GCA/000/152/165/GCA_000152165.1_ASM15216v1
Neisseria gonorrhoeae MS11	528354	Proteobacteria	Betaproteobacteria	52.3983	Complete Genome	ftp://ftp.ncbi.nlm.nih.gov/genomes/all/GCA/000/156/855/GCA_000156855.2_ASM15685v2
Achromobacter xylosoxidans A8	762376	Proteobacteria	Betaproteobacteria	65.791	Complete Genome	ftp://ftp.ncbi.nlm.nih.gov/genomes/all/GCA/000/165/835/GCA_000165835.1_ASM16583v1
Nitrosomonas sp. AL212	153948	Proteobacteria	Betaproteobacteria	44.7559	Complete Genome	ftp://ftp.ncbi.nlm.nih.gov/genomes/all/GCA/000/175/095/GCA_000175095.2_ASM17509v2
Acidovorax avenae subsp. avenae ATCC 19860	643561	Proteobacteria	Betaproteobacteria	68.8	Complete Genome	ftp://ftp.ncbi.nlm.nih.gov/genomes/all/GCA/000/176/855/GCA_000176855.2_ASM17685v2
Burkholderia sp. CCGE1001	640510	Proteobacteria	Betaproteobacteria	63.3458	Complete Genome	ftp://ftp.ncbi.nlm.nih.gov/genomes/all/GCA/000/176/935/GCA_000176935.3_ASM17693v3
Alicycliphilus denitrificans BC	596153	Proteobacteria	Betaproteobacteria	67.9887	Complete Genome	ftp://ftp.ncbi.nlm.nih.gov/genomes/all/GCA/000/179/015/GCA_000179015.2_ASM17901v2
Methylovorus sp. MP688	887061	Proteobacteria	Betaproteobacteria	55.4	Complete Genome	ftp://ftp.ncbi.nlm.nih.gov/genomes/all/GCA/000/183/115/GCA_000183115.1_ASM18311v1
Variovorax paradoxus EPS	595537	Proteobacteria	Betaproteobacteria	66.5	Complete Genome	ftp://ftp.ncbi.nlm.nih.gov/genomes/all/GCA/000/184/745/GCA_000184745.1_ASM18474v1
Taylorella equigenitalis MCE9	937774	Proteobacteria	Betaproteobacteria	37.4	Complete Genome	ftp://ftp.ncbi.nlm.nih.gov/genomes/all/GCA/000/185/745/GCA_000185745.1_ASM18574v1
Neisseria meningitidis G2136	935599	Proteobacteria	Betaproteobacteria	51.7	Complete Genome	ftp://ftp.ncbi.nlm.nih.gov/genomes/all/GCA/000/191/425/GCA_000191425.1_ASM19142v1
Neisseria meningitidis H44/76	909420	Proteobacteria	Betaproteobacteria	51.4	Complete Genome	ftp://ftp.ncbi.nlm.nih.gov/genomes/all/GCA/000/191/445/GCA_000191445.1_ASM19144v1
Neisseria meningitidis M01-240149	935591	Proteobacteria	Betaproteobacteria	51.4	Complete Genome	ftp://ftp.ncbi.nlm.nih.gov/genomes/all/GCA/000/191/465/GCA_000191465.1_ASM19146v1
Neisseria meningitidis M01-240355	935588	Proteobacteria	Betaproteobacteria	51.5	Complete Genome	ftp://ftp.ncbi.nlm.nih.gov/genomes/all/GCA/000/191/485/GCA_000191485.1_ASM19148v1
Neisseria meningitidis M04-240196	935593	Proteobacteria	Betaproteobacteria	51.4	Complete Genome	ftp://ftp.ncbi.nlm.nih.gov/genomes/all/GCA/000/191/505/GCA_000191505.1_ASM19150v1
Neisseria meningitidis NZ-05/33	935589	Proteobacteria	Betaproteobacteria	51.3	Complete Genome	ftp://ftp.ncbi.nlm.nih.gov/genomes/all/GCA/000/191/525/GCA_000191525.1_ASM19152v1
Bordetella pertussis B1917	743277	Proteobacteria	Betaproteobacteria	67.7	Complete Genome	ftp://ftp.ncbi.nlm.nih.gov/genomes/all/GCA/000/193/595/GCA_000193595.3_ASM19359v3
Bordetella pertussis B1920	743278	Proteobacteria	Betaproteobacteria	67.7	Complete Genome	ftp://ftp.ncbi.nlm.nih.gov/genomes/all/GCA/000/193/615/GCA_000193615.3_ASM19361v3
Burkholderia gladioli BSR3	999541	Proteobacteria	Betaproteobacteria	67.4147	Complete Genome	ftp://ftp.ncbi.nlm.nih.gov/genomes/all/GCA/000/194/745/GCA_000194745.1_ASM19474v1
Bordetella bronchiseptica RB50	257310	Proteobacteria	Betaproteobacteria	68.1	Complete Genome	ftp://ftp.ncbi.nlm.nih.gov/genomes/all/GCA/000/195/675/GCA_000195675.1_ASM19567v1
Bordetella parapertussis 12822	257311	Proteobacteria	Betaproteobacteria	68.1	Complete Genome	ftp://ftp.ncbi.nlm.nih.gov/genomes/all/GCA/000/195/695/GCA_000195695.1_ASM19569v1
Cupriavidus metallidurans CH34	266264	Proteobacteria	Betaproteobacteria	63.5184	Complete Genome	ftp://ftp.ncbi.nlm.nih.gov/genomes/all/GCA/000/196/015/GCA_000196015.1_ASM19601v1
Neisseria lactamica 020-06	489653	Proteobacteria	Betaproteobacteria	52.3	Complete Genome	ftp://ftp.ncbi.nlm.nih.gov/genomes/all/GCA/000/196/295/GCA_000196295.1_ASM19629v1
Nitrosospira multiformis ATCC 25196	323848	Proteobacteria	Betaproteobacteria	53.835	Complete Genome	ftp://ftp.ncbi.nlm.nih.gov/genomes/all/GCA/000/196/355/GCA_000196355.1_ASM19635v1
Paraburkholderia rhizoxinica HKI 454	882378	Proteobacteria	Betaproteobacteria	60.6963	Complete Genome	ftp://ftp.ncbi.nlm.nih.gov/genomes/all/GCA/000/198/775/GCA_000198775.1_ASM19877v1
Cupriavidus pinatubonensis JMP134	264198	Proteobacteria	Betaproteobacteria	64.4539	Complete Genome	ftp://ftp.ncbi.nlm.nih.gov/genomes/all/GCA/000/203/875/GCA_000203875.1_ASM20387v1
Burkholderia cenocepacia HI2424	331272	Proteobacteria	Betaproteobacteria	66.8004	Complete Genome	ftp://ftp.ncbi.nlm.nih.gov/genomes/all/GCA/000/203/955/GCA_000203955.1_ASM20395v1
Alicycliphilus denitrificans K601	596154	Proteobacteria	Betaproteobacteria	67.9137	Complete Genome	ftp://ftp.ncbi.nlm.nih.gov/genomes/all/GCA/000/204/645/GCA_000204645.1_ASM20464v1
Pusillimonas sp. T7-7	1007105	Proteobacteria	Betaproteobacteria	56.8906	Complete Genome	ftp://ftp.ncbi.nlm.nih.gov/genomes/all/GCA/000/209/655/GCA_000209655.1_ASM20965v1
Bordetella pertussis CS	1017264	Proteobacteria	Betaproteobacteria	67.7	Complete Genome	ftp://ftp.ncbi.nlm.nih.gov/genomes/all/GCA/000/212/975/GCA_000212975.1_ASM21297v1
Delftia sp. Cs1-4	742013	Proteobacteria	Betaproteobacteria	66.7	Complete Genome	ftp://ftp.ncbi.nlm.nih.gov/genomes/all/GCA/000/214/395/GCA_000214395.1_ASM21439v1
Ralstonia solanacearum Po82	1031711	Proteobacteria	Betaproteobacteria	66.6359	Complete Genome	ftp://ftp.ncbi.nlm.nih.gov/genomes/all/GCA/000/215/325/GCA_000215325.1_ASM21532v1
Ramlibacter tataouinensis TTB310	365046	Proteobacteria	Betaproteobacteria	70	Complete Genome	ftp://ftp.ncbi.nlm.nih.gov/genomes/all/GCA/000/215/705/GCA_000215705.1_ASM21570v1
Candidatus Tremblaya princeps PCIT	891398	Proteobacteria	Betaproteobacteria	58.8	Complete Genome	ftp://ftp.ncbi.nlm.nih.gov/genomes/all/GCA/000/219/195/GCA_000219195.1_ASM21919v1
Cupriavidus necator N-1	1042878	Proteobacteria	Betaproteobacteria	65.4817	Complete Genome	ftp://ftp.ncbi.nlm.nih.gov/genomes/all/GCA/000/219/215/GCA_000219215.1_ASM21921v1
Nitrosomonas sp. Is79A3	261292	Proteobacteria	Betaproteobacteria	45.4	Complete Genome	ftp://ftp.ncbi.nlm.nih.gov/genomes/all/GCA/000/219/585/GCA_000219585.1_ASM21958v1
Advenella kashmirensis WT001	1036672	Proteobacteria	Betaproteobacteria	54.7927	Complete Genome	ftp://ftp.ncbi.nlm.nih.gov/genomes/all/GCA/000/219/915/GCA_000219915.3_ASM21991v3
Candidatus Tremblaya princeps PCVAL	1053648	Proteobacteria	Betaproteobacteria	58.8	Complete Genome	ftp://ftp.ncbi.nlm.nih.gov/genomes/all/GCA/000/220/965/GCA_000220965.1_ASM22096v1
Collimonas fungivorans Ter331	1005048	Proteobacteria	Betaproteobacteria	59.6	Complete Genome	ftp://ftp.ncbi.nlm.nih.gov/genomes/all/GCA/000/221/045/GCA_000221045.1_ASM22104v1
Taylorella asinigenitalis MCE3	1008459	Proteobacteria	Betaproteobacteria	38.3	Complete Genome	ftp://ftp.ncbi.nlm.nih.gov/genomes/all/GCA/000/226/625/GCA_000226625.1_ASM22662v1
Burkholderia sp. YI23	1097668	Proteobacteria	Betaproteobacteria	63.2554	Complete Genome	ftp://ftp.ncbi.nlm.nih.gov/genomes/all/GCA/000/236/065/GCA_000236065.1_ASM23606v1
Burkholderia cenocepacia H111	1055524	Proteobacteria	Betaproteobacteria	67.3149	Complete Genome	ftp://ftp.ncbi.nlm.nih.gov/genomes/all/GCA/000/236/215/GCA_000236215.4_ASM23621v4
Azospira oryzae PS	640081	Proteobacteria	Betaproteobacteria	65.4	Complete Genome	ftp://ftp.ncbi.nlm.nih.gov/genomes/all/GCA/000/236/665/GCA_000236665.1_ASM23666v1
Neisseria meningitidis WUE 2594	942513	Proteobacteria	Betaproteobacteria	51.8	Complete Genome	ftp://ftp.ncbi.nlm.nih.gov/genomes/all/GCA/000/253/215/GCA_000253215.1_ASM25321v1
Burkholderia sp. KJ006	416344	Proteobacteria	Betaproteobacteria	67.1891	Complete Genome	ftp://ftp.ncbi.nlm.nih.gov/genomes/all/GCA/000/262/695/GCA_000262695.1_ASM26269v1
Hydrogenophaga sp. PBC	795665	Proteobacteria	Betaproteobacteria	68.4	Complete Genome	ftp://ftp.ncbi.nlm.nih.gov/genomes/all/GCA/000/263/795/GCA_000263795.2_Hint_PBC
Taylorella equigenitalis ATCC 35865	743973	Proteobacteria	Betaproteobacteria	37.3	Complete Genome	ftp://ftp.ncbi.nlm.nih.gov/genomes/all/GCA/000/276/685/GCA_000276685.1_ASM27668v1
Ralstonia solanacearum PSI07	859657	Proteobacteria	Betaproteobacteria	66.2884	Complete Genome	ftp://ftp.ncbi.nlm.nih.gov/genomes/all/GCA/000/283/475/GCA_000283475.1_ASM28347v1
Pseudogulbenkiania sp. NH8B	748280	Proteobacteria	Betaproteobacteria	64.4	Complete Genome	ftp://ftp.ncbi.nlm.nih.gov/genomes/all/GCA/000/283/535/GCA_000283535.1_ASM28353v1
Rubrivivax gelatinosus IL144	983917	Proteobacteria	Betaproteobacteria	71.2	Complete Genome	ftp://ftp.ncbi.nlm.nih.gov/genomes/all/GCA/000/284/255/GCA_000284255.1_ASM28425v1
Burkholderia cepacia GG4	1009846	Proteobacteria	Betaproteobacteria	66.7142	Complete Genome	ftp://ftp.ncbi.nlm.nih.gov/genomes/all/GCA/000/292/915/GCA_000292915.1_ASM29291v1
Burkholderia pseudomallei BPC006	1229785	Proteobacteria	Betaproteobacteria	68.2204	Complete Genome	ftp://ftp.ncbi.nlm.nih.gov/genomes/all/GCA/000/294/635/GCA_000294635.1_ASM29463v1
Sulfuricella denitrificans skB26	1163617	Proteobacteria	Betaproteobacteria	56.1162	Complete Genome	ftp://ftp.ncbi.nlm.nih.gov/genomes/all/GCA/000/297/055/GCA_000297055.2_ASM29705v2
Paraburkholderia phenoliruptrix BR3459a	1229205	Proteobacteria	Betaproteobacteria	63.1193	Complete Genome	ftp://ftp.ncbi.nlm.nih.gov/genomes/all/GCA/000/300/095/GCA_000300095.1_ASM30009v1
Acidovorax sp. KKS102	358220	Proteobacteria	Betaproteobacteria	64.9	Complete Genome	ftp://ftp.ncbi.nlm.nih.gov/genomes/all/GCA/000/302/535/GCA_000302535.1_ASM30253v1
Bordetella pertussis 18323	568706	Proteobacteria	Betaproteobacteria	67.7	Complete Genome	ftp://ftp.ncbi.nlm.nih.gov/genomes/all/GCA/000/306/945/GCA_000306945.1_ASM30694v1
Bordetella parapertussis Bpp5	1208660	Proteobacteria	Betaproteobacteria	67.7798	Complete Genome	ftp://ftp.ncbi.nlm.nih.gov/genomes/all/GCA/000/317/935/GCA_000317935.1_ASM31793v1
Bordetella bronchiseptica MO149	1208658	Proteobacteria	Betaproteobacteria	68.4	Complete Genome	ftp://ftp.ncbi.nlm.nih.gov/genomes/all/GCA/000/317/955/GCA_000317955.1_ASM31795v1
Bordetella bronchiseptica 253	568707	Proteobacteria	Betaproteobacteria	68.1	Complete Genome	ftp://ftp.ncbi.nlm.nih.gov/genomes/all/GCA/000/318/015/GCA_000318015.1_ASM31801v1
Candidatus Kinetoplastibacterium crithidii (ex Angomonas deanei ATCC 30255)	1267577	Proteobacteria	Betaproteobacteria	31	Complete Genome	ftp://ftp.ncbi.nlm.nih.gov/genomes/all/GCA/000/319/225/GCA_000319225.1_ASM31922v1
Candidatus Kinetoplastibacterium blastocrithidii (ex Strigomonas culicis)	1208923	Proteobacteria	Betaproteobacteria	32.5	Complete Genome	ftp://ftp.ncbi.nlm.nih.gov/genomes/all/GCA/000/319/245/GCA_000319245.1_ASM31924v1
Candidatus Kinetoplastibacterium desouzaii TCC079E	1208919	Proteobacteria	Betaproteobacteria	30.2	Complete Genome	ftp://ftp.ncbi.nlm.nih.gov/genomes/all/GCA/000/340/795/GCA_000340795.1_ASM34079v1
Candidatus Kinetoplastibacterium crithidii TCC036E	1208918	Proteobacteria	Betaproteobacteria	31	Complete Genome	ftp://ftp.ncbi.nlm.nih.gov/genomes/all/GCA/000/340/825/GCA_000340825.1_ASM34082v1
Candidatus Kinetoplastibacterium oncopeltii TCC290E	1208920	Proteobacteria	Betaproteobacteria	31.2	Complete Genome	ftp://ftp.ncbi.nlm.nih.gov/genomes/all/GCA/000/340/865/GCA_000340865.1_ASM34086v1
Candidatus Kinetoplastibacterium galatii TCC219	1208921	Proteobacteria	Betaproteobacteria	32.4	Complete Genome	ftp://ftp.ncbi.nlm.nih.gov/genomes/all/GCA/000/340/905/GCA_000340905.1_ASM34090v1
Candidatus Kinetoplastibacterium blastocrithidii TCC012E	1208922	Proteobacteria	Betaproteobacteria	32.5	Complete Genome	ftp://ftp.ncbi.nlm.nih.gov/genomes/all/GCA/000/340/925/GCA_000340925.1_ASM34092v1
Bordetella holmesii F627	1266729	Proteobacteria	Betaproteobacteria	62.7	Complete Genome	ftp://ftp.ncbi.nlm.nih.gov/genomes/all/GCA/000/341/465/GCA_000341465.2_ASM34146v2
Bordetella holmesii H558	1281885	Proteobacteria	Betaproteobacteria	62.7	Complete Genome	ftp://ftp.ncbi.nlm.nih.gov/genomes/all/GCA/000/341/485/GCA_000341485.2_ASM34148v2
beta proteobacterium CB	543913	Proteobacteria	Betaproteobacteria	46.1	Complete Genome	ftp://ftp.ncbi.nlm.nih.gov/genomes/all/GCA/000/342/265/GCA_000342265.1_ASM34226v1
Azoarcus sp. KH32C	748247	Proteobacteria	Betaproteobacteria	65.0239	Complete Genome	ftp://ftp.ncbi.nlm.nih.gov/genomes/all/GCA/000/349/945/GCA_000349945.1_ASM34994v1
Nitrosospira lacus	1288494	Proteobacteria	Betaproteobacteria	53.6	Complete Genome	ftp://ftp.ncbi.nlm.nih.gov/genomes/all/GCA/000/355/765/GCA_000355765.4_ASM35576v4
Burkholderia thailandensis MSMB121	1249661	Proteobacteria	Betaproteobacteria	67.5106	Complete Genome	ftp://ftp.ncbi.nlm.nih.gov/genomes/all/GCA/000/385/525/GCA_000385525.1_ASM38552v1
Burkholderia insecticola	758793	Proteobacteria	Betaproteobacteria	63.1457	Complete Genome	ftp://ftp.ncbi.nlm.nih.gov/genomes/all/GCA/000/402/035/GCA_000402035.1_ASM40203v1
Candidatus Tremblaya phenacola PAVE	1266371	Proteobacteria	Betaproteobacteria	42.1004	Complete Genome	ftp://ftp.ncbi.nlm.nih.gov/genomes/all/GCA/000/412/755/GCA_000412755.1_ASM41275v1
Burkholderia pseudomallei MSHR305	1335307	Proteobacteria	Betaproteobacteria	67.8908	Complete Genome	ftp://ftp.ncbi.nlm.nih.gov/genomes/all/GCA/000/439/695/GCA_000439695.1_ASM43969v1
Candidatus Nasuia deltocephalinicola str. NAS-ALF	1343077	Proteobacteria	Betaproteobacteria	17.1	Complete Genome	ftp://ftp.ncbi.nlm.nih.gov/genomes/all/GCA/000/442/605/GCA_000442605.1_ASM44260v1
Variovorax paradoxus B4	1246301	Proteobacteria	Betaproteobacteria	67.1432	Complete Genome	ftp://ftp.ncbi.nlm.nih.gov/genomes/all/GCA/000/463/015/GCA_000463015.1_ASM46301v1
Ralstonia pickettii DTP0602	1366050	Proteobacteria	Betaproteobacteria	65.9066	Complete Genome	ftp://ftp.ncbi.nlm.nih.gov/genomes/all/GCA/000/471/925/GCA_000471925.1_ASM47192v1
Candidatus Symbiobacter mobilis CR	946483	Proteobacteria	Betaproteobacteria	59.1	Complete Genome	ftp://ftp.ncbi.nlm.nih.gov/genomes/all/GCA/000/477/435/GCA_000477435.1_ASM47743v1
Burkholderia pseudomallei NCTC 13179	1241583	Proteobacteria	Betaproteobacteria	67.991	Complete Genome	ftp://ftp.ncbi.nlm.nih.gov/genomes/all/GCA/000/494/855/GCA_000494855.1_ASM49485v1
Pandoraea pnomenusa	93220	Proteobacteria	Betaproteobacteria	64.9	Complete Genome	ftp://ftp.ncbi.nlm.nih.gov/genomes/all/GCA/000/504/585/GCA_000504585.2_ASM50458v2
Achromobacter xylosoxidans NBRC 15126 = ATCC 27061	1216976	Proteobacteria	Betaproteobacteria	67.5	Complete Genome	ftp://ftp.ncbi.nlm.nih.gov/genomes/all/GCA/000/508/285/GCA_000508285.1_ASM50828v1
Burkholderia pseudomallei NCTC 13178	1249468	Proteobacteria	Betaproteobacteria	67.9365	Complete Genome	ftp://ftp.ncbi.nlm.nih.gov/genomes/all/GCA/000/511/895/GCA_000511895.1_ASM51189v1
Burkholderia pseudomallei NAU20B-16	1249476	Proteobacteria	Betaproteobacteria	68.0219	Complete Genome	ftp://ftp.ncbi.nlm.nih.gov/genomes/all/GCA/000/511/915/GCA_000511915.1_ASM51191v1
Burkholderia pseudomallei MSHR511	1249474	Proteobacteria	Betaproteobacteria	68.022	Complete Genome	ftp://ftp.ncbi.nlm.nih.gov/genomes/all/GCA/000/520/895/GCA_000520895.1_ASM52089v1
Advenella mimigardefordensis DPN7	1247726	Proteobacteria	Betaproteobacteria	54.2574	Complete Genome	ftp://ftp.ncbi.nlm.nih.gov/genomes/all/GCA/000/521/505/GCA_000521505.1_ASM52150v1
Burkholderia pseudomallei MSHR146	1249471	Proteobacteria	Betaproteobacteria	68.0219	Complete Genome	ftp://ftp.ncbi.nlm.nih.gov/genomes/all/GCA/000/521/645/GCA_000521645.1_ASM52164v1
Paraburkholderia caribensis MBA4	1323664	Proteobacteria	Betaproteobacteria	62.4918	Complete Genome	ftp://ftp.ncbi.nlm.nih.gov/genomes/all/GCA/000/522/545/GCA_000522545.2_ASM52254v2
Burkholderia thailandensis H0587	1249663	Proteobacteria	Betaproteobacteria	67.7476	Complete Genome	ftp://ftp.ncbi.nlm.nih.gov/genomes/all/GCA/000/567/905/GCA_000567905.1_ASM56790v1
Burkholderia thailandensis 2002721723	1241582	Proteobacteria	Betaproteobacteria	67.5432	Complete Genome	ftp://ftp.ncbi.nlm.nih.gov/genomes/all/GCA/000/567/925/GCA_000567925.1_ASM56792v1
Burkholderia thailandensis E444	1249662	Proteobacteria	Betaproteobacteria	67.6859	Complete Genome	ftp://ftp.ncbi.nlm.nih.gov/genomes/all/GCA/000/567/945/GCA_000567945.1_ASM56794v1
Burkholderia pseudomallei MSHR520	1249659	Proteobacteria	Betaproteobacteria	67.891	Complete Genome	ftp://ftp.ncbi.nlm.nih.gov/genomes/all/GCA/000/583/835/GCA_000583835.1_ASM58383v1
Pandoraea pnomenusa 3kgm	1416914	Proteobacteria	Betaproteobacteria	64.7	Complete Genome	ftp://ftp.ncbi.nlm.nih.gov/genomes/all/GCA/000/590/495/GCA_000590495.2_ASM59049v2
Snodgrassella alvi wkB2	1196094	Proteobacteria	Betaproteobacteria	41.3	Complete Genome	ftp://ftp.ncbi.nlm.nih.gov/genomes/all/GCA/000/600/005/GCA_000600005.1_ASM60000v1
Bordetella holmesii ATCC 51541	1247649	Proteobacteria	Betaproteobacteria	62.7	Complete Genome	ftp://ftp.ncbi.nlm.nih.gov/genomes/all/GCA/000/612/485/GCA_000612485.1_ASM61248v1
Castellaniella defragrans 65Phen	1437824	Proteobacteria	Betaproteobacteria	68.9	Complete Genome	ftp://ftp.ncbi.nlm.nih.gov/genomes/all/GCA/000/612/685/GCA_000612685.1_scf7180000000004
Burkholderia cepacia JBK9	1395570	Proteobacteria	Betaproteobacteria	66.8102	Complete Genome	ftp://ftp.ncbi.nlm.nih.gov/genomes/all/GCA/000/701/165/GCA_000701165.2_ASM70116v2
Burkholderia thailandensis USAMRU Malaysia #20	1249667	Proteobacteria	Betaproteobacteria	67.6643	Complete Genome	ftp://ftp.ncbi.nlm.nih.gov/genomes/all/GCA/000/706/745/GCA_000706745.1_ASM70674v1
Janthinobacterium agaricidamnosum NBRC 102515 = DSM 9628	1349767	Proteobacteria	Betaproteobacteria	61.1	Complete Genome	ftp://ftp.ncbi.nlm.nih.gov/genomes/all/GCA/000/723/165/GCA_000723165.1_JAG1
Comamonas testosteroni TK102	1392005	Proteobacteria	Betaproteobacteria	61.9	Complete Genome	ftp://ftp.ncbi.nlm.nih.gov/genomes/all/GCA/000/739/375/GCA_000739375.1_ASM73937v1
Basilea psittacipulmonis DSM 24701	1072685	Proteobacteria	Betaproteobacteria	40.3	Complete Genome	ftp://ftp.ncbi.nlm.nih.gov/genomes/all/GCA/000/743/945/GCA_000743945.1_ASM74394v1
Burkholderia cenocepacia	95486	Proteobacteria	Betaproteobacteria	66.9679	Complete Genome	ftp://ftp.ncbi.nlm.nih.gov/genomes/all/GCA/000/755/725/GCA_000755725.1_ASM75572v1
Burkholderia cepacia	292	Proteobacteria	Betaproteobacteria	67.0601	Complete Genome	ftp://ftp.ncbi.nlm.nih.gov/genomes/all/GCA/000/755/805/GCA_000755805.1_ASM75580v1
Burkholderia pseudomallei HBPUB10303a	1306419	Proteobacteria	Betaproteobacteria	68.178	Complete Genome	ftp://ftp.ncbi.nlm.nih.gov/genomes/all/GCA/000/755/905/GCA_000755905.1_ASM75590v1
Burkholderia pseudomallei HBPUB10134a	1306418	Proteobacteria	Betaproteobacteria	68.1217	Complete Genome	ftp://ftp.ncbi.nlm.nih.gov/genomes/all/GCA/000/755/925/GCA_000755925.1_ASM75592v1
Burkholderia pseudomallei MSHR5858	1306417	Proteobacteria	Betaproteobacteria	68.278	Complete Genome	ftp://ftp.ncbi.nlm.nih.gov/genomes/all/GCA/000/755/945/GCA_000755945.1_ASM75594v1
Burkholderia pseudomallei MSHR5848	1306420	Proteobacteria	Betaproteobacteria	68.0776	Complete Genome	ftp://ftp.ncbi.nlm.nih.gov/genomes/all/GCA/000/755/965/GCA_000755965.1_ASM75596v1
Burkholderia oklahomensis	342113	Proteobacteria	Betaproteobacteria	66.9427	Complete Genome	ftp://ftp.ncbi.nlm.nih.gov/genomes/all/GCA/000/755/985/GCA_000755985.1_ASM75598v1
Burkholderia multivorans	87883	Proteobacteria	Betaproteobacteria	66.6044	Complete Genome	ftp://ftp.ncbi.nlm.nih.gov/genomes/all/GCA/000/756/005/GCA_000756005.1_ASM75600v1
Paraburkholderia xenovorans LB400	266265	Proteobacteria	Betaproteobacteria	62.6331	Complete Genome	ftp://ftp.ncbi.nlm.nih.gov/genomes/all/GCA/000/756/045/GCA_000756045.1_ASM75604v1
Burkholderia pseudomallei MSHR5855	1306421	Proteobacteria	Betaproteobacteria	68.0218	Complete Genome	ftp://ftp.ncbi.nlm.nih.gov/genomes/all/GCA/000/756/065/GCA_000756065.1_ASM75606v1
Burkholderia pseudomallei 576	557724	Proteobacteria	Betaproteobacteria	68.034	Complete Genome	ftp://ftp.ncbi.nlm.nih.gov/genomes/all/GCA/000/756/185/GCA_000756185.1_ASM75618v1
Burkholderia pseudomallei Pasteur 52237	331978	Proteobacteria	Betaproteobacteria	68.0043	Complete Genome	ftp://ftp.ncbi.nlm.nih.gov/genomes/all/GCA/000/757/035/GCA_000757035.2_ASM75703v2
Burkholderia mallei NCTC 10247	320389	Proteobacteria	Betaproteobacteria	68.5228	Complete Genome	ftp://ftp.ncbi.nlm.nih.gov/genomes/all/GCA/000/762/285/GCA_000762285.1_ASM76228v1
Burkholderia pseudomallei NAU35A-3	1249477	Proteobacteria	Betaproteobacteria	68.0804	Complete Genome	ftp://ftp.ncbi.nlm.nih.gov/genomes/all/GCA/000/764/575/GCA_000764575.1_ASM76457v1
Burkholderia thailandensis MSMB59	1250339	Proteobacteria	Betaproteobacteria	67.6608	Complete Genome	ftp://ftp.ncbi.nlm.nih.gov/genomes/all/GCA/000/764/595/GCA_000764595.1_ASM76459v1
Burkholderia thailandensis E254	1249665	Proteobacteria	Betaproteobacteria	67.687	Complete Genome	ftp://ftp.ncbi.nlm.nih.gov/genomes/all/GCA/000/765/375/GCA_000765375.1_ASM76537v1
Bordetella holmesii 44057	1172205	Proteobacteria	Betaproteobacteria	62.7	Complete Genome	ftp://ftp.ncbi.nlm.nih.gov/genomes/all/GCA/000/765/395/GCA_000765395.1_ASM76539v1
Burkholderia pseudomallei MSHR62	1435984	Proteobacteria	Betaproteobacteria	68.1653	Complete Genome	ftp://ftp.ncbi.nlm.nih.gov/genomes/all/GCA/000/770/395/GCA_000770395.1_ASM77039v1
Burkholderia pseudomallei B03	1439854	Proteobacteria	Betaproteobacteria	68.0345	Complete Genome	ftp://ftp.ncbi.nlm.nih.gov/genomes/all/GCA/000/770/455/GCA_000770455.1_ASM77045v1
Burkholderia pseudomallei TSV 48	1435365	Proteobacteria	Betaproteobacteria	68.0199	Complete Genome	ftp://ftp.ncbi.nlm.nih.gov/genomes/all/GCA/000/770/495/GCA_000770495.1_ASM77049v1
Burkholderia pseudomallei K42	1439852	Proteobacteria	Betaproteobacteria	67.9824	Complete Genome	ftp://ftp.ncbi.nlm.nih.gov/genomes/all/GCA/000/770/515/GCA_000770515.1_ASM77051v1
Burkholderia pseudomallei A79A	1439855	Proteobacteria	Betaproteobacteria	68.0346	Complete Genome	ftp://ftp.ncbi.nlm.nih.gov/genomes/all/GCA/000/770/535/GCA_000770535.1_ASM77053v1
Neisseria meningitidis M7124	1095685	Proteobacteria	Betaproteobacteria	51.7	Complete Genome	ftp://ftp.ncbi.nlm.nih.gov/genomes/all/GCA/000/800/275/GCA_000800275.1_ASM80027v1
Burkholderia thailandensis	57975	Proteobacteria	Betaproteobacteria	67.6527	Complete Genome	ftp://ftp.ncbi.nlm.nih.gov/genomes/all/GCA/000/808/035/GCA_000808035.2_ASM80803v2
Bordetella pertussis 137	1403053	Proteobacteria	Betaproteobacteria	67.7	Complete Genome	ftp://ftp.ncbi.nlm.nih.gov/genomes/all/GCA/000/812/165/GCA_000812165.1_ASM81216v1
Pandoraea pulmonicola	93221	Proteobacteria	Betaproteobacteria	64.3	Complete Genome	ftp://ftp.ncbi.nlm.nih.gov/genomes/all/GCA/000/815/105/GCA_000815105.2_ASM81510v2
Neisseria meningitidis LNP21362	1386087	Proteobacteria	Betaproteobacteria	51.8	Complete Genome	ftp://ftp.ncbi.nlm.nih.gov/genomes/all/GCA/000/816/165/GCA_000816165.1_ASM81616v1
Neisseria elongata subsp. glycolytica ATCC 29315	546263	Proteobacteria	Betaproteobacteria	54.3	Complete Genome	ftp://ftp.ncbi.nlm.nih.gov/genomes/all/GCA/000/818/035/GCA_000818035.1_ASM81803v1
Sulfuritalea hydrogenivorans sk43H	1223802	Proteobacteria	Betaproteobacteria	63.3	Complete Genome	ftp://ftp.ncbi.nlm.nih.gov/genomes/all/GCA/000/828/635/GCA_000828635.1_ASM82863v1
Burkholderia sp. RPE67	758796	Proteobacteria	Betaproteobacteria	63.437	Complete Genome	ftp://ftp.ncbi.nlm.nih.gov/genomes/all/GCA/000/828/875/GCA_000828875.1_ASM82887v1
Serpentinomonas raichei	1458425	Proteobacteria	Betaproteobacteria	66	Complete Genome	ftp://ftp.ncbi.nlm.nih.gov/genomes/all/GCA/000/828/895/GCA_000828895.1_ASM82889v1
Serpentinomonas mccroryi	1458426	Proteobacteria	Betaproteobacteria	66.0813	Complete Genome	ftp://ftp.ncbi.nlm.nih.gov/genomes/all/GCA/000/828/915/GCA_000828915.1_ASM82891v1
Burkholderiales bacterium GJ-E10	1469502	Proteobacteria	Betaproteobacteria	66.3	Complete Genome	ftp://ftp.ncbi.nlm.nih.gov/genomes/all/GCA/000/828/975/GCA_000828975.1_ASM82897v1
Cupriavidus basilensis	68895	Proteobacteria	Betaproteobacteria	65.0222	Complete Genome	ftp://ftp.ncbi.nlm.nih.gov/genomes/all/GCA/000/832/305/GCA_000832305.1_ASM83230v1
Rugosibacter aromaticivorans	1565605	Proteobacteria	Betaproteobacteria	55.1	Complete Genome	ftp://ftp.ncbi.nlm.nih.gov/genomes/all/GCA/000/934/545/GCA_000934545.1_ASM93454v1
Pandoraea vervacti	656178	Proteobacteria	Betaproteobacteria	63.5703	Complete Genome	ftp://ftp.ncbi.nlm.nih.gov/genomes/all/GCA/000/934/605/GCA_000934605.2_ASM93460v2
Candidatus Methylopumilus turicensis	1581680	Proteobacteria	Betaproteobacteria	44.5	Complete Genome	ftp://ftp.ncbi.nlm.nih.gov/genomes/all/GCA/000/953/015/GCA_000953015.1_Candidatus_Methylopumilus_turicensis_MMS-10A-171
Ralstonia mannitolilytica	105219	Proteobacteria	Betaproteobacteria	65.4858	Complete Genome	ftp://ftp.ncbi.nlm.nih.gov/genomes/all/GCA/000/954/135/GCA_000954135.2_ASM95413v2
Burkholderia pseudomallei 1026b	884204	Proteobacteria	Betaproteobacteria	68.1608	Complete Genome	ftp://ftp.ncbi.nlm.nih.gov/genomes/all/GCA/000/959/125/GCA_000959125.1_ASM95912v1
Burkholderia pseudomallei 406e	360118	Proteobacteria	Betaproteobacteria	68.0654	Complete Genome	ftp://ftp.ncbi.nlm.nih.gov/genomes/all/GCA/000/959/145/GCA_000959145.1_ASM95914v1
Burkholderia pseudomallei MSHR840	1249475	Proteobacteria	Betaproteobacteria	68.0923	Complete Genome	ftp://ftp.ncbi.nlm.nih.gov/genomes/all/GCA/000/959/185/GCA_000959185.1_ASM95918v1
Burkholderia pseudomallei MSHR491	1249473	Proteobacteria	Betaproteobacteria	67.9777	Complete Genome	ftp://ftp.ncbi.nlm.nih.gov/genomes/all/GCA/000/959/205/GCA_000959205.1_ASM95920v1
Burkholderia pseudomallei MSHR2543	1249472	Proteobacteria	Betaproteobacteria	67.9014	Complete Genome	ftp://ftp.ncbi.nlm.nih.gov/genomes/all/GCA/000/959/225/GCA_000959225.1_ASM95922v1
Burkholderia ubonensis MSMB22	1249668	Proteobacteria	Betaproteobacteria	67.3091	Complete Genome	ftp://ftp.ncbi.nlm.nih.gov/genomes/all/GCA/000/959/245/GCA_000959245.1_ASM95924v1
Burkholderia pseudomallei 7894	441156	Proteobacteria	Betaproteobacteria	67.9208	Complete Genome	ftp://ftp.ncbi.nlm.nih.gov/genomes/all/GCA/000/959/265/GCA_000959265.1_ASM95926v1
Burkholderia pseudomallei K96243	272560	Proteobacteria	Betaproteobacteria	68.0502	Complete Genome	ftp://ftp.ncbi.nlm.nih.gov/genomes/all/GCA/000/959/285/GCA_000959285.1_ASM95928v1
Burkholderia sp. 2002721687	1468409	Proteobacteria	Betaproteobacteria	67.1361	Complete Genome	ftp://ftp.ncbi.nlm.nih.gov/genomes/all/GCA/000/959/325/GCA_000959325.1_ASM95932v1
Burkholderia pseudomallei PB08298010	1249658	Proteobacteria	Betaproteobacteria	67.946	Complete Genome	ftp://ftp.ncbi.nlm.nih.gov/genomes/all/GCA/000/959/345/GCA_000959345.1_ASM95934v1
Burkholderia oklahomensis C6786	441162	Proteobacteria	Betaproteobacteria	67.0684	Complete Genome	ftp://ftp.ncbi.nlm.nih.gov/genomes/all/GCA/000/959/365/GCA_000959365.1_ASM95936v1
Burkholderia thailandensis 2002721643	1249660	Proteobacteria	Betaproteobacteria	67.6469	Complete Genome	ftp://ftp.ncbi.nlm.nih.gov/genomes/all/GCA/000/959/425/GCA_000959425.1_ASM95942v1
Burkholderia vietnamiensis LMG 10929	1449978	Proteobacteria	Betaproteobacteria	66.8371	Complete Genome	ftp://ftp.ncbi.nlm.nih.gov/genomes/all/GCA/000/959/445/GCA_000959445.1_ASM95944v1
Burkholderia mallei	13373	Proteobacteria	Betaproteobacteria	68.4243	Complete Genome	ftp://ftp.ncbi.nlm.nih.gov/genomes/all/GCA/000/959/465/GCA_000959465.1_ASM95946v1
Burkholderia dolosa AU0158	350701	Proteobacteria	Betaproteobacteria	67.0353	Complete Genome	ftp://ftp.ncbi.nlm.nih.gov/genomes/all/GCA/000/959/505/GCA_000959505.1_ASM95950v1
Burkholderia multivorans ATCC BAA-247	985079	Proteobacteria	Betaproteobacteria	67.2008	Complete Genome	ftp://ftp.ncbi.nlm.nih.gov/genomes/all/GCA/000/959/525/GCA_000959525.1_ASM95952v1
Burkholderia ambifaria AMMD	339670	Proteobacteria	Betaproteobacteria	66.7904	Complete Genome	ftp://ftp.ncbi.nlm.nih.gov/genomes/all/GCA/000/959/545/GCA_000959545.1_ASM95954v1
Burkholderia thailandensis 34	1249664	Proteobacteria	Betaproteobacteria	67.4379	Complete Genome	ftp://ftp.ncbi.nlm.nih.gov/genomes/all/GCA/000/959/605/GCA_000959605.1_ASM95960v1
Burkholderia gladioli	28095	Proteobacteria	Betaproteobacteria	67.6197	Complete Genome	ftp://ftp.ncbi.nlm.nih.gov/genomes/all/GCA/000/959/725/GCA_000959725.1_ASM95972v1
Burkholderia glumae LMG 2196 = ATCC 33617	1176492	Proteobacteria	Betaproteobacteria	68.1733	Complete Genome	ftp://ftp.ncbi.nlm.nih.gov/genomes/all/GCA/000/960/995/GCA_000960995.1_ASM96099v1
Paraburkholderia fungorum	134537	Proteobacteria	Betaproteobacteria	61.7706	Complete Genome	ftp://ftp.ncbi.nlm.nih.gov/genomes/all/GCA/000/961/515/GCA_000961515.1_ASM96151v1
Alcaligenes faecalis	511	Proteobacteria	Betaproteobacteria	56.807	Complete Genome	ftp://ftp.ncbi.nlm.nih.gov/genomes/all/GCA/000/967/305/GCA_000967305.2_ASM96730v2
Janthinobacterium sp. B9-8	1236179	Proteobacteria	Betaproteobacteria	48.7	Complete Genome	ftp://ftp.ncbi.nlm.nih.gov/genomes/all/GCA/000/969/645/GCA_000969645.2_ASM96964v2
Pandoraea oxalativorans	573737	Proteobacteria	Betaproteobacteria	63.0653	Complete Genome	ftp://ftp.ncbi.nlm.nih.gov/genomes/all/GCA/000/972/785/GCA_000972785.3_ASM97278v3
Polynucleobacter duraquae	1835254	Proteobacteria	Betaproteobacteria	45.2	Complete Genome	ftp://ftp.ncbi.nlm.nih.gov/genomes/all/GCA/000/973/625/GCA_000973625.1_ASM97362v1
Ferriphaselus amnicola	1188319	Proteobacteria	Betaproteobacteria	55.9	Complete Genome	ftp://ftp.ncbi.nlm.nih.gov/genomes/all/GCA/000/974/685/GCA_000974685.2_FaOYT1_2.0
Candidatus Methylopumilus planktonicus	1581557	Proteobacteria	Betaproteobacteria	37	Complete Genome	ftp://ftp.ncbi.nlm.nih.gov/genomes/all/GCA/000/981/505/GCA_000981505.1_Candidatus_Methylopumilus_planktonicus_MMS-2-53
Nitrosomonas communis	44574	Proteobacteria	Betaproteobacteria	44.7	Complete Genome	ftp://ftp.ncbi.nlm.nih.gov/genomes/all/GCA/001/007/935/GCA_001007935.1_ASM100793v1
[Polyangium] brachysporum	413882	Proteobacteria	Betaproteobacteria	67.5	Complete Genome	ftp://ftp.ncbi.nlm.nih.gov/genomes/all/GCA/001/017/435/GCA_001017435.1_ASM101743v1
Burkholderia pyrrocinia	60550	Proteobacteria	Betaproteobacteria	66.4698	Complete Genome	ftp://ftp.ncbi.nlm.nih.gov/genomes/all/GCA/001/028/665/GCA_001028665.1_ASM102866v1
Pandoraea faecigallinarum	656179	Proteobacteria	Betaproteobacteria	63.45	Complete Genome	ftp://ftp.ncbi.nlm.nih.gov/genomes/all/GCA/001/029/105/GCA_001029105.3_ASM102910v3
Neisseria meningitidis M0579	935590	Proteobacteria	Betaproteobacteria	51.4	Complete Genome	ftp://ftp.ncbi.nlm.nih.gov/genomes/all/GCA/001/029/835/GCA_001029835.1_ASM102983v1
Neisseria gonorrhoeae	485	Proteobacteria	Betaproteobacteria	52.4	Complete Genome	ftp://ftp.ncbi.nlm.nih.gov/genomes/all/GCA/001/047/225/GCA_001047225.1_ASM104722v1
Achromobacter xylosoxidans	85698	Proteobacteria	Betaproteobacteria	67.7	Complete Genome	ftp://ftp.ncbi.nlm.nih.gov/genomes/all/GCA/001/051/055/GCA_001051055.1_ASM105105v1
Thauera humireducens	1134435	Proteobacteria	Betaproteobacteria	66.4	Complete Genome	ftp://ftp.ncbi.nlm.nih.gov/genomes/all/GCA/001/051/995/GCA_001051995.2_ASM105199v2
Bordetella hinzii	103855	Proteobacteria	Betaproteobacteria	67.1	Complete Genome	ftp://ftp.ncbi.nlm.nih.gov/genomes/all/GCA/001/078/275/GCA_001078275.1_ASM107827v1
Methylophilus sp. TWE2	1662285	Proteobacteria	Betaproteobacteria	49.5	Complete Genome	ftp://ftp.ncbi.nlm.nih.gov/genomes/all/GCA/001/183/865/GCA_001183865.1_ASM118386v1
Azoarcus sp. CIB	198107	Proteobacteria	Betaproteobacteria	65.8	Complete Genome	ftp://ftp.ncbi.nlm.nih.gov/genomes/all/GCA/001/190/925/GCA_001190925.1_ASM119092v1
Massilia sp. NR 4-1	1678028	Proteobacteria	Betaproteobacteria	63.8	Complete Genome	ftp://ftp.ncbi.nlm.nih.gov/genomes/all/GCA/001/191/005/GCA_001191005.1_ASM119100v1
Ottowia sp. oral taxon 894	1658672	Proteobacteria	Betaproteobacteria	63.6	Complete Genome	ftp://ftp.ncbi.nlm.nih.gov/genomes/all/GCA/001/262/075/GCA_001262075.1_ASM126207v1
Herbaspirillum hiltneri N3	1262470	Proteobacteria	Betaproteobacteria	60.8	Complete Genome	ftp://ftp.ncbi.nlm.nih.gov/genomes/all/GCA/001/267/925/GCA_001267925.1_ASM126792v1
Candidatus Profftella armatura	669502	Proteobacteria	Betaproteobacteria	24.2953	Complete Genome	ftp://ftp.ncbi.nlm.nih.gov/genomes/all/GCA/001/278/785/GCA_001278785.1_ASM127878v1
Cupriavidus gilardii CR3	1267562	Proteobacteria	Betaproteobacteria	67.5462	Complete Genome	ftp://ftp.ncbi.nlm.nih.gov/genomes/all/GCA/001/281/465/GCA_001281465.1_ASM128146v1
Burkholderia sp. HB1	1678678	Proteobacteria	Betaproteobacteria	62.9398	Complete Genome	ftp://ftp.ncbi.nlm.nih.gov/genomes/all/GCA/001/293/045/GCA_001293045.1_ASM129304v1
Burkholderia pseudomallei	28450	Proteobacteria	Betaproteobacteria	68.1035	Complete Genome	ftp://ftp.ncbi.nlm.nih.gov/genomes/all/GCA/001/318/245/GCA_001318245.1_ASM131824v1
Burkholderia plantarii	41899	Proteobacteria	Betaproteobacteria	68.5777	Complete Genome	ftp://ftp.ncbi.nlm.nih.gov/genomes/all/GCA/001/411/805/GCA_001411805.1_ASM141180v1
Limnohabitans sp. 63ED37-2	1678128	Proteobacteria	Betaproteobacteria	59.9	Complete Genome	ftp://ftp.ncbi.nlm.nih.gov/genomes/all/GCA/001/412/535/GCA_001412535.1_ASM141253v1
Limnohabitans sp. 103DPR2	1678129	Proteobacteria	Betaproteobacteria	53.3	Complete Genome	ftp://ftp.ncbi.nlm.nih.gov/genomes/all/GCA/001/412/575/GCA_001412575.1_ASM141257v1
Massilia sp. WG5	1707785	Proteobacteria	Betaproteobacteria	65.5368	Complete Genome	ftp://ftp.ncbi.nlm.nih.gov/genomes/all/GCA/001/412/595/GCA_001412595.2_ASM141259v2
Paraburkholderia caribensis	75105	Proteobacteria	Betaproteobacteria	62.5464	Complete Genome	ftp://ftp.ncbi.nlm.nih.gov/genomes/all/GCA/001/449/005/GCA_001449005.1_ASM144900v1
Nitrosomonas ureae	44577	Proteobacteria	Betaproteobacteria	44.5	Complete Genome	ftp://ftp.ncbi.nlm.nih.gov/genomes/all/GCA/001/455/205/GCA_001455205.1_ASM145520v1
Pandoraea norimbergensis	93219	Proteobacteria	Betaproteobacteria	63.1	Complete Genome	ftp://ftp.ncbi.nlm.nih.gov/genomes/all/GCA/001/465/545/GCA_001465545.3_ASM146554v3
Paucibacter sp. KCTC 42545	1768242	Proteobacteria	Betaproteobacteria	63.2	Complete Genome	ftp://ftp.ncbi.nlm.nih.gov/genomes/all/GCA/001/477/625/GCA_001477625.1_ASM147762v1
Roseateles depolymerans	76731	Proteobacteria	Betaproteobacteria	66.6	Complete Genome	ftp://ftp.ncbi.nlm.nih.gov/genomes/all/GCA/001/483/865/GCA_001483865.1_ASM148386v1
Herbaspirillum rubrisubalbicans M1	1078773	Proteobacteria	Betaproteobacteria	61.5	Complete Genome	ftp://ftp.ncbi.nlm.nih.gov/genomes/all/GCA/001/483/945/GCA_001483945.1_ASM148394v1
Burkholderia sp. Bp5365	1740162	Proteobacteria	Betaproteobacteria	67.1361	Complete Genome	ftp://ftp.ncbi.nlm.nih.gov/genomes/all/GCA/001/513/745/GCA_001513745.1_ASM151374v1
Burkholderia oklahomensis EO147	441163	Proteobacteria	Betaproteobacteria	66.9427	Complete Genome	ftp://ftp.ncbi.nlm.nih.gov/genomes/all/GCA/001/522/105/GCA_001522105.2_ASM152210v2
Burkholderia sp. NRF60-BP8	1637853	Proteobacteria	Betaproteobacteria	67.2633	Complete Genome	ftp://ftp.ncbi.nlm.nih.gov/genomes/all/GCA/001/522/585/GCA_001522585.2_ASM152258v2
Burkholderia sp. BDU8	1385592	Proteobacteria	Betaproteobacteria	66.4586	Complete Genome	ftp://ftp.ncbi.nlm.nih.gov/genomes/all/GCA/001/522/635/GCA_001522635.2_ASM152263v2
Burkholderia sp. BDU6	1385591	Proteobacteria	Betaproteobacteria	66.2747	Complete Genome	ftp://ftp.ncbi.nlm.nih.gov/genomes/all/GCA/001/523/745/GCA_001523745.2_ASM152374v2
Burkholderia sp. LA-2-3-30-S1-D2	1637862	Proteobacteria	Betaproteobacteria	66.3457	Complete Genome	ftp://ftp.ncbi.nlm.nih.gov/genomes/all/GCA/001/523/915/GCA_001523915.2_ASM152391v2
Burkholderia sp. MSMB0266	1637837	Proteobacteria	Betaproteobacteria	67.0101	Complete Genome	ftp://ftp.ncbi.nlm.nih.gov/genomes/all/GCA/001/524/445/GCA_001524445.2_ASM152444v2
Burkholderia sp. MSMB0852	1637841	Proteobacteria	Betaproteobacteria	67.3096	Complete Genome	ftp://ftp.ncbi.nlm.nih.gov/genomes/all/GCA/001/524/625/GCA_001524625.2_ASM152462v2
Burkholderia sp. MSMB0856	1637869	Proteobacteria	Betaproteobacteria	66.4943	Complete Genome	ftp://ftp.ncbi.nlm.nih.gov/genomes/all/GCA/001/524/645/GCA_001524645.2_ASM152464v2
Burkholderia sp. MSMB617WGS	1637831	Proteobacteria	Betaproteobacteria	67.5048	Complete Genome	ftp://ftp.ncbi.nlm.nih.gov/genomes/all/GCA/001/532/025/GCA_001532025.2_ASM153202v2
Burkholderia sp. PAMC 26561	1795043	Proteobacteria	Betaproteobacteria	59.238	Complete Genome	ftp://ftp.ncbi.nlm.nih.gov/genomes/all/GCA/001/557/535/GCA_001557535.2_ASM155753v2
Variovorax sp. PAMC 28711	1795631	Proteobacteria	Betaproteobacteria	66	Complete Genome	ftp://ftp.ncbi.nlm.nih.gov/genomes/all/GCA/001/577/265/GCA_001577265.1_ASM157726v1
Burkholderia sp. PAMC 28687	1795874	Proteobacteria	Betaproteobacteria	59.9824	Complete Genome	ftp://ftp.ncbi.nlm.nih.gov/genomes/all/GCA/001/577/465/GCA_001577465.1_ASM157746v1
Ramlibacter tataouinensis	94132	Proteobacteria	Betaproteobacteria	67.6	Complete Genome	ftp://ftp.ncbi.nlm.nih.gov/genomes/all/GCA/001/580/455/GCA_001580455.1_ASM158045v1
Collimonas fungivorans	158899	Proteobacteria	Betaproteobacteria	59	Complete Genome	ftp://ftp.ncbi.nlm.nih.gov/genomes/all/GCA/001/584/145/GCA_001584145.1_ASM158414v1
Collimonas arenae	279058	Proteobacteria	Betaproteobacteria	56.8	Complete Genome	ftp://ftp.ncbi.nlm.nih.gov/genomes/all/GCA/001/584/165/GCA_001584165.1_ASM158416v1
Collimonas pratensis	279113	Proteobacteria	Betaproteobacteria	58.7	Complete Genome	ftp://ftp.ncbi.nlm.nih.gov/genomes/all/GCA/001/584/185/GCA_001584185.1_ASM158418v1
Ralstonia solanacearum	305	Proteobacteria	Betaproteobacteria	66.6626	Complete Genome	ftp://ftp.ncbi.nlm.nih.gov/genomes/all/GCA/001/587/155/GCA_001587155.1_ASM158715v1
Acidovorax citrulli	80869	Proteobacteria	Betaproteobacteria	68.8166	Complete Genome	ftp://ftp.ncbi.nlm.nih.gov/genomes/all/GCA/001/593/665/GCA_001593665.2_ASM159366v2
Betaproteobacteria bacterium UKL13-2	1690485	Proteobacteria	Betaproteobacteria	55	Complete Genome	ftp://ftp.ncbi.nlm.nih.gov/genomes/all/GCA/001/602/455/GCA_001602455.1_ASM160245v1
Burkholderia sp. OLGA172	1804984	Proteobacteria	Betaproteobacteria	60.8474	Complete Genome	ftp://ftp.ncbi.nlm.nih.gov/genomes/all/GCA/001/634/365/GCA_001634365.1_ASM163436v1
Mitsuaria sp. 7	1658665	Proteobacteria	Betaproteobacteria	68.2827	Complete Genome	ftp://ftp.ncbi.nlm.nih.gov/genomes/all/GCA/001/653/795/GCA_001653795.1_ASM165379v1
Ralstonia insidiosa	190721	Proteobacteria	Betaproteobacteria	63.6454	Complete Genome	ftp://ftp.ncbi.nlm.nih.gov/genomes/all/GCA/001/653/935/GCA_001653935.1_ASM165393v1
Bordetella bronchialis	463025	Proteobacteria	Betaproteobacteria	67.3	Complete Genome	ftp://ftp.ncbi.nlm.nih.gov/genomes/all/GCA/001/676/705/GCA_001676705.1_ASM167670v1
Bordetella flabilis	463014	Proteobacteria	Betaproteobacteria	65.9427	Complete Genome	ftp://ftp.ncbi.nlm.nih.gov/genomes/all/GCA/001/676/725/GCA_001676725.1_ASM167672v1
Azoarcus olearius	418699	Proteobacteria	Betaproteobacteria	67.8	Complete Genome	ftp://ftp.ncbi.nlm.nih.gov/genomes/all/GCA/001/682/385/GCA_001682385.1_ASM168238v1
Burkholderiales bacterium YL45	1834205	Proteobacteria	Betaproteobacteria	44.1	Complete Genome	ftp://ftp.ncbi.nlm.nih.gov/genomes/all/GCA/001/688/905/GCA_001688905.2_ASM168890v2
Bordetella pseudohinzii	1331258	Proteobacteria	Betaproteobacteria	66.4828	Complete Genome	ftp://ftp.ncbi.nlm.nih.gov/genomes/all/GCA/001/698/185/GCA_001698185.1_ASM169818v1
Bordetella holmesii	35814	Proteobacteria	Betaproteobacteria	62.7	Complete Genome	ftp://ftp.ncbi.nlm.nih.gov/genomes/all/GCA/001/704/215/GCA_001704215.1_ASM170421v1
Bordetella parapertussis	519	Proteobacteria	Betaproteobacteria	68.1	Complete Genome	ftp://ftp.ncbi.nlm.nih.gov/genomes/all/GCA/001/704/255/GCA_001704255.1_ASM170425v1
Bordetella sp. H567	1697043	Proteobacteria	Betaproteobacteria	66.1	Complete Genome	ftp://ftp.ncbi.nlm.nih.gov/genomes/all/GCA/001/704/295/GCA_001704295.1_ASM170429v1
Bordetella bronchiseptica	518	Proteobacteria	Betaproteobacteria	68.4	Complete Genome	ftp://ftp.ncbi.nlm.nih.gov/genomes/all/GCA/001/704/355/GCA_001704355.1_ASM170435v1
Methyloversatilis sp. RAC08	1842540	Proteobacteria	Betaproteobacteria	65	Complete Genome	ftp://ftp.ncbi.nlm.nih.gov/genomes/all/GCA/001/713/355/GCA_001713355.1_ASM171335v1
Hydrogenophaga sp. RAC07	1842537	Proteobacteria	Betaproteobacteria	65.5	Complete Genome	ftp://ftp.ncbi.nlm.nih.gov/genomes/all/GCA/001/713/375/GCA_001713375.1_ASM171337v1
Acidovorax sp. RAC01	1842533	Proteobacteria	Betaproteobacteria	65.3	Complete Genome	ftp://ftp.ncbi.nlm.nih.gov/genomes/all/GCA/001/714/725/GCA_001714725.1_ASM171472v1
Burkholderia diffusa	488732	Proteobacteria	Betaproteobacteria	66.4604	Complete Genome	ftp://ftp.ncbi.nlm.nih.gov/genomes/all/GCA/001/718/315/GCA_001718315.1_ASM171831v1
Burkholderia territorii	1503055	Proteobacteria	Betaproteobacteria	66.7484	Complete Genome	ftp://ftp.ncbi.nlm.nih.gov/genomes/all/GCA/001/718/335/GCA_001718335.1_ASM171833v1
Burkholderia pseudomultivorans	1207504	Proteobacteria	Betaproteobacteria	67.2873	Complete Genome	ftp://ftp.ncbi.nlm.nih.gov/genomes/all/GCA/001/718/415/GCA_001718415.1_ASM171841v1
Burkholderia seminalis	488731	Proteobacteria	Betaproteobacteria	67.2738	Complete Genome	ftp://ftp.ncbi.nlm.nih.gov/genomes/all/GCA/001/718/535/GCA_001718535.1_ASM171853v1
Burkholderia metallica	488729	Proteobacteria	Betaproteobacteria	67.1235	Complete Genome	ftp://ftp.ncbi.nlm.nih.gov/genomes/all/GCA/001/718/555/GCA_001718555.1_ASM171855v1
Burkholderia ubonensis	101571	Proteobacteria	Betaproteobacteria	66.8518	Complete Genome	ftp://ftp.ncbi.nlm.nih.gov/genomes/all/GCA/001/718/655/GCA_001718655.1_ASM171865v1
Burkholderia latens	488446	Proteobacteria	Betaproteobacteria	66.3874	Complete Genome	ftp://ftp.ncbi.nlm.nih.gov/genomes/all/GCA/001/718/795/GCA_001718795.1_ASM171879v1
Burkholderia sp. Bp7605	1740163	Proteobacteria	Betaproteobacteria	64.3841	Complete Genome	ftp://ftp.ncbi.nlm.nih.gov/genomes/all/GCA/001/718/875/GCA_001718875.1_ASM171887v1
Burkholderia stagnalis	1503054	Proteobacteria	Betaproteobacteria	67.6836	Complete Genome	ftp://ftp.ncbi.nlm.nih.gov/genomes/all/GCA/001/718/955/GCA_001718955.1_ASM171895v1
Delftia tsuruhatensis	180282	Proteobacteria	Betaproteobacteria	66.3	Complete Genome	ftp://ftp.ncbi.nlm.nih.gov/genomes/all/GCA/001/753/225/GCA_001753225.1_ASM175322v1
Hydrogenophaga crassostreae	1763535	Proteobacteria	Betaproteobacteria	61.3	Complete Genome	ftp://ftp.ncbi.nlm.nih.gov/genomes/all/GCA/001/761/385/GCA_001761385.1_ASM176138v1
Jeongeupia sp. USM3	1906741	Proteobacteria	Betaproteobacteria	65.4	Complete Genome	ftp://ftp.ncbi.nlm.nih.gov/genomes/all/GCA/001/808/185/GCA_001808185.1_ASM180818v1
Cupriavidus sp. USMAHM13	1389192	Proteobacteria	Betaproteobacteria	68.5561	Complete Genome	ftp://ftp.ncbi.nlm.nih.gov/genomes/all/GCA/001/854/285/GCA_001854285.1_ASM185428v1
Cupriavidus sp. USMAA2-4	876364	Proteobacteria	Betaproteobacteria	67.9525	Complete Genome	ftp://ftp.ncbi.nlm.nih.gov/genomes/all/GCA/001/854/305/GCA_001854305.1_ASM185430v1
Cupriavidus sp. USMAA1020	367825	Proteobacteria	Betaproteobacteria	68.4881	Complete Genome	ftp://ftp.ncbi.nlm.nih.gov/genomes/all/GCA/001/854/325/GCA_001854325.1_ASM185432v1
Chromobacterium vaccinii	1108595	Proteobacteria	Betaproteobacteria	64.3	Complete Genome	ftp://ftp.ncbi.nlm.nih.gov/genomes/all/GCA/001/855/275/GCA_001855275.1_ASM185527v1
Paraburkholderia sprentiae WSM5005	754502	Proteobacteria	Betaproteobacteria	63.1824	Complete Genome	ftp://ftp.ncbi.nlm.nih.gov/genomes/all/GCA/001/865/575/GCA_001865575.1_ASM186557v1
Janthinobacterium sp. 1_2014MBL_MicDiv	1644131	Proteobacteria	Betaproteobacteria	63.6	Complete Genome	ftp://ftp.ncbi.nlm.nih.gov/genomes/all/GCA/001/865/675/GCA_001865675.1_ASM186567v1
Polynucleobacter asymbioticus	576611	Proteobacteria	Betaproteobacteria	44.7	Complete Genome	ftp://ftp.ncbi.nlm.nih.gov/genomes/all/GCA/001/874/565/GCA_001874565.1_ASM187456v1
Ralstonia solanacearum OE1-1	1429399	Proteobacteria	Betaproteobacteria	66.868	Complete Genome	ftp://ftp.ncbi.nlm.nih.gov/genomes/all/GCA/001/879/565/GCA_001879565.1_ASM187956v1
Delftia sp. HK171	1920191	Proteobacteria	Betaproteobacteria	66.9	Complete Genome	ftp://ftp.ncbi.nlm.nih.gov/genomes/all/GCA/001/886/655/GCA_001886655.1_ASM188665v1
Ralstonia solanacearum FJAT-1458	1130828	Proteobacteria	Betaproteobacteria	66.7685	Complete Genome	ftp://ftp.ncbi.nlm.nih.gov/genomes/all/GCA/001/887/535/GCA_001887535.1_ASM188753v1
Thauera chlorobenzoica	96773	Proteobacteria	Betaproteobacteria	67.3	Complete Genome	ftp://ftp.ncbi.nlm.nih.gov/genomes/all/GCA/001/922/305/GCA_001922305.1_ASM192230v1
Paraburkholderia sp. SOS3	1926494	Proteobacteria	Betaproteobacteria	63.2962	Complete Genome	ftp://ftp.ncbi.nlm.nih.gov/genomes/all/GCA/001/922/345/GCA_001922345.1_ASM192234v1
Pandoraea thiooxydans	445709	Proteobacteria	Betaproteobacteria	63.2	Complete Genome	ftp://ftp.ncbi.nlm.nih.gov/genomes/all/GCA/001/931/675/GCA_001931675.1_ASM193167v1
Betaproteobacteria bacterium GR16-43	1904640	Proteobacteria	Betaproteobacteria	67.1	Complete Genome	ftp://ftp.ncbi.nlm.nih.gov/genomes/all/GCA/001/953/215/GCA_001953215.1_ASM195321v1
Rhodoferax koreense	1842727	Proteobacteria	Betaproteobacteria	66.158	Complete Genome	ftp://ftp.ncbi.nlm.nih.gov/genomes/all/GCA/001/955/695/GCA_001955695.1_ASM195569v1
Rhodoferax saidenbachensis	1484693	Proteobacteria	Betaproteobacteria	60.9	Complete Genome	ftp://ftp.ncbi.nlm.nih.gov/genomes/all/GCA/001/955/715/GCA_001955715.1_ASM195571v1
Rhodoferax antarcticus	81479	Proteobacteria	Betaproteobacteria	58.871	Complete Genome	ftp://ftp.ncbi.nlm.nih.gov/genomes/all/GCA/001/955/735/GCA_001955735.1_ASM195573v1
Neisseria gonorrhoeae NG-k51.05	1247414	Proteobacteria	Betaproteobacteria	52.3983	Complete Genome	ftp://ftp.ncbi.nlm.nih.gov/genomes/all/GCA/001/956/715/GCA_001956715.1_ASM195671v1
Janthinobacterium sp. LM6	1938606	Proteobacteria	Betaproteobacteria	63	Complete Genome	ftp://ftp.ncbi.nlm.nih.gov/genomes/all/GCA/002/002/885/GCA_002002885.1_ASM200288v1
Aquaspirillum sp. LM1	1938604	Proteobacteria	Betaproteobacteria	61.6	Complete Genome	ftp://ftp.ncbi.nlm.nih.gov/genomes/all/GCA/002/002/905/GCA_002002905.1_ASM200290v1
Paenalcaligenes hominis	643674	Proteobacteria	Betaproteobacteria	48.4	Complete Genome	ftp://ftp.ncbi.nlm.nih.gov/genomes/all/GCA/002/005/365/GCA_002005365.1_ASM200536v1
Cupriavidus necator	106590	Proteobacteria	Betaproteobacteria	65.4546	Complete Genome	ftp://ftp.ncbi.nlm.nih.gov/genomes/all/GCA/002/011/925/GCA_002011925.2_ASM201192v2
Comamonas kerstersii	225992	Proteobacteria	Betaproteobacteria	59.6	Complete Genome	ftp://ftp.ncbi.nlm.nih.gov/genomes/all/GCA/002/056/725/GCA_002056725.1_ASM205672v1
Neisseria mucosa	488	Proteobacteria	Betaproteobacteria	50.9	Complete Genome	ftp://ftp.ncbi.nlm.nih.gov/genomes/all/GCA/002/073/715/GCA_002073715.2_ASM207371v2
Bordetella genomosp. 13	463040	Proteobacteria	Betaproteobacteria	67.5	Complete Genome	ftp://ftp.ncbi.nlm.nih.gov/genomes/all/GCA/002/119/665/GCA_002119665.1_ASM211966v1
Bordetella genomosp. 8	1416806	Proteobacteria	Betaproteobacteria	66.2	Complete Genome	ftp://ftp.ncbi.nlm.nih.gov/genomes/all/GCA/002/119/685/GCA_002119685.1_ASM211968v1
Bordetella genomosp. 6	463024	Proteobacteria	Betaproteobacteria	68.5	Complete Genome	ftp://ftp.ncbi.nlm.nih.gov/genomes/all/GCA/002/119/705/GCA_002119705.1_ASM211970v1
Bordetella genomosp. 9	1416803	Proteobacteria	Betaproteobacteria	66	Complete Genome	ftp://ftp.ncbi.nlm.nih.gov/genomes/all/GCA/002/119/725/GCA_002119725.1_ASM211972v1
Oxalobacter formigenes OXCC13	556269	Proteobacteria	Betaproteobacteria	49.6	Complete Genome	ftp://ftp.ncbi.nlm.nih.gov/genomes/all/GCA/002/128/345/GCA_002128345.1_ASM212834v1
Ralstonia solanacearum FJAT-91	1130829	Proteobacteria	Betaproteobacteria	66.8681	Complete Genome	ftp://ftp.ncbi.nlm.nih.gov/genomes/all/GCA/002/155/245/GCA_002155245.1_ASM215524v1
Acidovorax carolinensis	553814	Proteobacteria	Betaproteobacteria	63.7308	Complete Genome	ftp://ftp.ncbi.nlm.nih.gov/genomes/all/GCA/002/157/185/GCA_002157185.1_ASM215718v1
Comamonas serinivorans	1082851	Proteobacteria	Betaproteobacteria	67.9	Complete Genome	ftp://ftp.ncbi.nlm.nih.gov/genomes/all/GCA/002/158/865/GCA_002158865.1_ASM215886v1
Sulfuriferula sp. AH1	1985873	Proteobacteria	Betaproteobacteria	54.9792	Complete Genome	ftp://ftp.ncbi.nlm.nih.gov/genomes/all/GCA/002/162/035/GCA_002162035.1_ASM216203v1
Diaphorobacter polyhydroxybutyrativorans	1546149	Proteobacteria	Betaproteobacteria	66.7	Complete Genome	ftp://ftp.ncbi.nlm.nih.gov/genomes/all/GCA/002/214/645/GCA_002214645.1_ASM221464v1
Laribacter hongkongensis	168471	Proteobacteria	Betaproteobacteria	62.3	Complete Genome	ftp://ftp.ncbi.nlm.nih.gov/genomes/all/GCA/002/215/055/GCA_002215055.1_ASM221505v1
Neisseria sp. 10023	1853278	Proteobacteria	Betaproteobacteria	54	Complete Genome	ftp://ftp.ncbi.nlm.nih.gov/genomes/all/GCA/002/216/145/GCA_002216145.1_ASM221614v1
Aquitalea magnusonii	332411	Proteobacteria	Betaproteobacteria	59.3	Complete Genome	ftp://ftp.ncbi.nlm.nih.gov/genomes/all/GCA/002/217/795/GCA_002217795.2_ASM221779v2
Vitreoscilla filiformis	63	Proteobacteria	Betaproteobacteria	63.4916	Complete Genome	ftp://ftp.ncbi.nlm.nih.gov/genomes/all/GCA/002/222/655/GCA_002222655.1_ASM222265v1
Neisseria sp. KEM232	655307	Proteobacteria	Betaproteobacteria	58.5	Complete Genome	ftp://ftp.ncbi.nlm.nih.gov/genomes/all/GCA/002/237/445/GCA_002237445.1_ASM223744v1
Herbaspirillum sp. meg3	2025949	Proteobacteria	Betaproteobacteria	57.1	Complete Genome	ftp://ftp.ncbi.nlm.nih.gov/genomes/all/GCA/002/257/565/GCA_002257565.1_ASM225756v1
Paraburkholderia aromaticivorans	2026199	Proteobacteria	Betaproteobacteria	62.9278	Complete Genome	ftp://ftp.ncbi.nlm.nih.gov/genomes/all/GCA/002/278/075/GCA_002278075.1_ASM227807v1
Taylorella equigenitalis	29575	Proteobacteria	Betaproteobacteria	37.3	Complete Genome	ftp://ftp.ncbi.nlm.nih.gov/genomes/all/GCA/002/288/155/GCA_002288155.1_ASM228815v1
Candidatus Nasuia deltocephalinicola	1160784	Proteobacteria	Betaproteobacteria	15.2	Complete Genome	ftp://ftp.ncbi.nlm.nih.gov/genomes/all/GCA/002/290/365/GCA_002290365.1_ASM229036v1
Variovorax boronicumulans	436515	Proteobacteria	Betaproteobacteria	68	Complete Genome	ftp://ftp.ncbi.nlm.nih.gov/genomes/all/GCA/002/291/405/GCA_002291405.1_ASM229140v1
Neisseria sp. 10022	1853276	Proteobacteria	Betaproteobacteria	49.2	Complete Genome	ftp://ftp.ncbi.nlm.nih.gov/genomes/all/GCA/002/327/085/GCA_002327085.1_ASM232708v1
Janthinobacterium svalbardensis	368607	Proteobacteria	Betaproteobacteria	62.1	Complete Genome	ftp://ftp.ncbi.nlm.nih.gov/genomes/all/GCA/002/327/145/GCA_002327145.1_ASM232714v1
Thauera sp. K11	2005884	Proteobacteria	Betaproteobacteria	67.6881	Complete Genome	ftp://ftp.ncbi.nlm.nih.gov/genomes/all/GCA/002/354/895/GCA_002354895.1_ASM235489v1
Burkholderia stabilis	95485	Proteobacteria	Betaproteobacteria	66.6947	Complete Genome	ftp://ftp.ncbi.nlm.nih.gov/genomes/all/GCA/002/356/275/GCA_002356275.1_ASM235627v1
Burkholderia gladioli pv. gladioli	32009	Proteobacteria	Betaproteobacteria	67.969	Complete Genome	ftp://ftp.ncbi.nlm.nih.gov/genomes/all/GCA/002/393/425/GCA_002393425.1_ASM239342v1
Ralstonia pickettii	329	Proteobacteria	Betaproteobacteria	65.9077	Complete Genome	ftp://ftp.ncbi.nlm.nih.gov/genomes/all/GCA/002/393/485/GCA_002393485.1_ASM239348v1
Massilia violaceinigra	2045208	Proteobacteria	Betaproteobacteria	63.4664	Complete Genome	ftp://ftp.ncbi.nlm.nih.gov/genomes/all/GCA/002/752/675/GCA_002752675.1_ASM275267v1
Rhizobacter gummiphilus	946333	Proteobacteria	Betaproteobacteria	69.7	Complete Genome	ftp://ftp.ncbi.nlm.nih.gov/genomes/all/GCA/002/762/215/GCA_002762215.1_ASM276221v1
Chromobacterium sp. ATCC 53434	2059672	Proteobacteria	Betaproteobacteria	65.1	Complete Genome	ftp://ftp.ncbi.nlm.nih.gov/genomes/all/GCA/002/848/345/GCA_002848345.1_ASM284834v1
Rhodocyclaceae bacterium	1898103	Proteobacteria	Betaproteobacteria	63.8	Complete Genome	ftp://ftp.ncbi.nlm.nih.gov/genomes/all/GCA/002/863/805/GCA_002863805.1_ASM286380v1
Azoarcus sp. SY39	2067960	Proteobacteria	Betaproteobacteria	66.5	Complete Genome	ftp://ftp.ncbi.nlm.nih.gov/genomes/all/GCA/002/872/475/GCA_002872475.1_ASM287247v1
Neisseriaceae bacterium DSM 100970	2052837	Proteobacteria	Betaproteobacteria	36.4	Complete Genome	ftp://ftp.ncbi.nlm.nih.gov/genomes/all/GCA/002/892/535/GCA_002892535.1_ASM289253v1
Achromobacter sp. AONIH1	1758194	Proteobacteria	Betaproteobacteria	67.4	Complete Genome	ftp://ftp.ncbi.nlm.nih.gov/genomes/all/GCA/002/902/905/GCA_002902905.1_ASM290290v1
Paraburkholderia terrae	311230	Proteobacteria	Betaproteobacteria	61.9388	Complete Genome	ftp://ftp.ncbi.nlm.nih.gov/genomes/all/GCA/002/902/925/GCA_002902925.1_ASM290292v1
Pandoraea apista	93218	Proteobacteria	Betaproteobacteria	62.7	Complete Genome	ftp://ftp.ncbi.nlm.nih.gov/genomes/all/GCA/002/951/195/GCA_002951195.1_ASM295119v1
Simonsiella muelleri ATCC 29453	641147	Proteobacteria	Betaproteobacteria	41.5	Complete Genome	ftp://ftp.ncbi.nlm.nih.gov/genomes/all/GCA/002/951/835/GCA_002951835.1_ASM295183v1
Vitreoscilla sp. C1	96942	Proteobacteria	Betaproteobacteria	44.2	Complete Genome	ftp://ftp.ncbi.nlm.nih.gov/genomes/all/GCA/002/951/955/GCA_002951955.1_ASM295195v1
Oligella urethralis	90245	Proteobacteria	Betaproteobacteria	46.1	Complete Genome	ftp://ftp.ncbi.nlm.nih.gov/genomes/all/GCA/002/984/485/GCA_002984485.1_ASM298448v1
Ottowia oryzae	2109914	Proteobacteria	Betaproteobacteria	66.8	Complete Genome	ftp://ftp.ncbi.nlm.nih.gov/genomes/all/GCA/003/008/535/GCA_003008535.1_ASM300853v1
Melaminivora sp. SC2-9	2109913	Proteobacteria	Betaproteobacteria	68.2	Complete Genome	ftp://ftp.ncbi.nlm.nih.gov/genomes/all/GCA/003/008/575/GCA_003008575.1_ASM300857v1
Simplicispira suum	2109915	Proteobacteria	Betaproteobacteria	63.2506	Complete Genome	ftp://ftp.ncbi.nlm.nih.gov/genomes/all/GCA/003/008/595/GCA_003008595.1_ASM300859v1
Melaminivora sp. SC2-7	2116657	Proteobacteria	Betaproteobacteria	69.1	Complete Genome	ftp://ftp.ncbi.nlm.nih.gov/genomes/all/GCA/003/013/695/GCA_003013695.1_ASM301369v1
Variovorax sp. PMC12	2126319	Proteobacteria	Betaproteobacteria	67.6163	Complete Genome	ftp://ftp.ncbi.nlm.nih.gov/genomes/all/GCA/003/019/815/GCA_003019815.1_ASM301981v1
Burkholderia vietnamiensis	60552	Proteobacteria	Betaproteobacteria	66.8371	Complete Genome	ftp://ftp.ncbi.nlm.nih.gov/genomes/all/GCA/003/019/945/GCA_003019945.1_ASM301994v1
Massilia armeniaca	2072590	Proteobacteria	Betaproteobacteria	66.3	Complete Genome	ftp://ftp.ncbi.nlm.nih.gov/genomes/all/GCA/003/028/855/GCA_003028855.1_ASM302885v1
Thauera aromatica K172	44139	Proteobacteria	Betaproteobacteria	67.2059	Complete Genome	ftp://ftp.ncbi.nlm.nih.gov/genomes/all/GCA/003/030/465/GCA_003030465.1_ASM303046v1
Zoogloeaceae bacteirum Par-f-2	2080469	Proteobacteria	Betaproteobacteria	63.5	Complete Genome	ftp://ftp.ncbi.nlm.nih.gov/genomes/all/GCA/003/054/515/GCA_003054515.1_ASM305451v1
Bordetella sp. HZ20	2163011	Proteobacteria	Betaproteobacteria	55.5	Complete Genome	ftp://ftp.ncbi.nlm.nih.gov/genomes/all/GCA/003/058/465/GCA_003058465.1_ASM305846v1
Candidatus Kinetoplastibacterium sorsogonicusi	1576550	Proteobacteria	Betaproteobacteria	25.2	Complete Genome	ftp://ftp.ncbi.nlm.nih.gov/genomes/all/GCA/003/072/465/GCA_003072465.1_ASM307246v1
Aquabacterium olei	1296669	Proteobacteria	Betaproteobacteria	67.2656	Complete Genome	ftp://ftp.ncbi.nlm.nih.gov/genomes/all/GCA/003/100/395/GCA_003100395.1_ASM310039v1
Azoarcus communis	41977	Proteobacteria	Betaproteobacteria	62.8	Complete Genome	ftp://ftp.ncbi.nlm.nih.gov/genomes/all/GCA/003/111/665/GCA_003111665.1_ASM311166v1
Massilia oculi	945844	Proteobacteria	Betaproteobacteria	65.6	Complete Genome	ftp://ftp.ncbi.nlm.nih.gov/genomes/all/GCA/003/143/515/GCA_003143515.1_ASM314351v1
Burkholderia sp. JP2-270	2217913	Proteobacteria	Betaproteobacteria	65.9484	Complete Genome	ftp://ftp.ncbi.nlm.nih.gov/genomes/all/GCA/003/233/675/GCA_003233675.1_ASM323367v1
Cupriavidus metallidurans	119219	Proteobacteria	Betaproteobacteria	63.4922	Complete Genome	ftp://ftp.ncbi.nlm.nih.gov/genomes/all/GCA/003/260/185/GCA_003260185.2_ASM326018v2
Polynucleobacter paneuropaeus	2527775	Proteobacteria	Betaproteobacteria	46.1	Complete Genome	ftp://ftp.ncbi.nlm.nih.gov/genomes/all/GCA/003/261/295/GCA_003261295.1_ASM326129v1
Massilia sp. YMA4	1593482	Proteobacteria	Betaproteobacteria	66.2	Complete Genome	ftp://ftp.ncbi.nlm.nih.gov/genomes/all/GCA/003/293/715/GCA_003293715.1_ASM329371v1
Chromobacterium sp. IIBBL 112-1	2202141	Proteobacteria	Betaproteobacteria	63.8678	Complete Genome	ftp://ftp.ncbi.nlm.nih.gov/genomes/all/GCA/003/325/475/GCA_003325475.1_ASM332547v1
Chromobacterium sp. IIBBL 274-1	2202142	Proteobacteria	Betaproteobacteria	63.8938	Complete Genome	ftp://ftp.ncbi.nlm.nih.gov/genomes/all/GCA/003/325/495/GCA_003325495.1_ASM332549v1
Paraburkholderia caledonica	134536	Proteobacteria	Betaproteobacteria	61.9094	Complete Genome	ftp://ftp.ncbi.nlm.nih.gov/genomes/all/GCA/003/330/745/GCA_003330745.1_ASM333074v1
Paraburkholderia graminis	60548	Proteobacteria	Betaproteobacteria	62.8376	Complete Genome	ftp://ftp.ncbi.nlm.nih.gov/genomes/all/GCA/003/330/785/GCA_003330785.1_ASM333078v1
Paraburkholderia hospita	169430	Proteobacteria	Betaproteobacteria	61.9835	Complete Genome	ftp://ftp.ncbi.nlm.nih.gov/genomes/all/GCA/003/330/805/GCA_003330805.1_ASM333080v1
Paraburkholderia terricola	169427	Proteobacteria	Betaproteobacteria	63.6711	Complete Genome	ftp://ftp.ncbi.nlm.nih.gov/genomes/all/GCA/003/330/825/GCA_003330825.1_ASM333082v1
Hydromonas sp. F02	2268024	Proteobacteria	Betaproteobacteria	48.3	Complete Genome	ftp://ftp.ncbi.nlm.nih.gov/genomes/all/GCA/003/339/525/GCA_003339525.1_ASM333952v1
Burkholderia sp. IDO3	1705310	Proteobacteria	Betaproteobacteria	66.3724	Complete Genome	ftp://ftp.ncbi.nlm.nih.gov/genomes/all/GCA/003/366/075/GCA_003366075.1_ASM336607v1
Paraburkholderia caffeinilytica	1761016	Proteobacteria	Betaproteobacteria	62.2359	Complete Genome	ftp://ftp.ncbi.nlm.nih.gov/genomes/all/GCA/003/368/325/GCA_003368325.1_ASM336832v1
Candidatus Vidania fulgoroideae	881286	Proteobacteria	Betaproteobacteria	18.2	Complete Genome	ftp://ftp.ncbi.nlm.nih.gov/genomes/all/GCA/003/391/315/GCA_003391315.1_ASM339131v1
Dechloromonas sp. HYN0024	2231055	Proteobacteria	Betaproteobacteria	59.4	Complete Genome	ftp://ftp.ncbi.nlm.nih.gov/genomes/all/GCA/003/441/615/GCA_003441615.1_ASM344161v1
Chromobacterium rhizoryzae	1778675	Proteobacteria	Betaproteobacteria	62.9	Complete Genome	ftp://ftp.ncbi.nlm.nih.gov/genomes/all/GCA/003/443/515/GCA_003443515.1_ASM344351v1
Burkholderia thailandensis E264	271848	Proteobacteria	Betaproteobacteria	67.6	Complete Genome	ftp://ftp.ncbi.nlm.nih.gov/genomes/all/GCA/003/568/605/GCA_003568605.1_ASM356860v1
Achromobacter sp. B7	2282475	Proteobacteria	Betaproteobacteria	64.7	Complete Genome	ftp://ftp.ncbi.nlm.nih.gov/genomes/all/GCA/003/600/685/GCA_003600685.1_ASM360068v1
Sutterella megalosphaeroides	2494234	Proteobacteria	Betaproteobacteria	62.8	Complete Genome	ftp://ftp.ncbi.nlm.nih.gov/genomes/all/GCA/003/609/995/GCA_003609995.1_ASM360999v1
Ralstonia pseudosolanacearum	1310165	Proteobacteria	Betaproteobacteria	66.7	Complete Genome	ftp://ftp.ncbi.nlm.nih.gov/genomes/all/GCA/003/612/975/GCA_003612975.1_ASM361297v1
Azoarcus sp. DN11	356837	Proteobacteria	Betaproteobacteria	66.3	Complete Genome	ftp://ftp.ncbi.nlm.nih.gov/genomes/all/GCA/003/628/555/GCA_003628555.1_ASM362855v1
Janthinobacterium agaricidamnosum	55508	Proteobacteria	Betaproteobacteria	62.9	Complete Genome	ftp://ftp.ncbi.nlm.nih.gov/genomes/all/GCA/003/667/705/GCA_003667705.1_ASM366770v1
Acidovorax sp. 1608163	2478662	Proteobacteria	Betaproteobacteria	63.7	Complete Genome	ftp://ftp.ncbi.nlm.nih.gov/genomes/all/GCA/003/669/015/GCA_003669015.1_ASM366901v1
Alcaligenes aquatilis	323284	Proteobacteria	Betaproteobacteria	56.3	Complete Genome	ftp://ftp.ncbi.nlm.nih.gov/genomes/all/GCA/003/671/915/GCA_003671915.1_ASM367191v1
Burkholderia lata	482957	Proteobacteria	Betaproteobacteria	66.2006	Complete Genome	ftp://ftp.ncbi.nlm.nih.gov/genomes/all/GCA/003/711/145/GCA_003711145.1_ASM371114v1
Polaromonas sp. SP1	2268087	Proteobacteria	Betaproteobacteria	63.1	Complete Genome	ftp://ftp.ncbi.nlm.nih.gov/genomes/all/GCA/003/711/205/GCA_003711205.1_ASM371120v1
Herbaspirillum rubrisubalbicans	80842	Proteobacteria	Betaproteobacteria	61.5	Complete Genome	ftp://ftp.ncbi.nlm.nih.gov/genomes/all/GCA/003/719/195/GCA_003719195.1_ASM371919v1
Achromobacter denitrificans	32002	Proteobacteria	Betaproteobacteria	67.1	Complete Genome	ftp://ftp.ncbi.nlm.nih.gov/genomes/all/GCA/003/812/265/GCA_003812265.1_ASM381226v1
Burkholderia dolosa	152500	Proteobacteria	Betaproteobacteria	67.0353	Complete Genome	ftp://ftp.ncbi.nlm.nih.gov/genomes/all/GCA/003/813/045/GCA_003813045.1_ASM381304v1
Pigmentiphaga sp. H8	2488560	Proteobacteria	Betaproteobacteria	67.8	Complete Genome	ftp://ftp.ncbi.nlm.nih.gov/genomes/all/GCA/003/854/895/GCA_003854895.1_ASM385489v1
Cupriavidus pauculus	82633	Proteobacteria	Betaproteobacteria	67.1211	Complete Genome	ftp://ftp.ncbi.nlm.nih.gov/genomes/all/GCA/003/854/935/GCA_003854935.1_ASM385493v1
Iodobacter sp. H11R3	2496266	Proteobacteria	Betaproteobacteria	48	Complete Genome	ftp://ftp.ncbi.nlm.nih.gov/genomes/all/GCA/003/952/345/GCA_003952345.1_ASM395234v1
Undibacterium parvum	401471	Proteobacteria	Betaproteobacteria	50.2	Complete Genome	ftp://ftp.ncbi.nlm.nih.gov/genomes/all/GCA/003/955/735/GCA_003955735.1_ASM395573v1
Mycoavidus cysteinexigens	1553431	Proteobacteria	Betaproteobacteria	48.9	Complete Genome	ftp://ftp.ncbi.nlm.nih.gov/genomes/all/GCA/003/966/915/GCA_003966915.1_ASM396691v1
Eikenella corrodens	539	Proteobacteria	Betaproteobacteria	56	Complete Genome	ftp://ftp.ncbi.nlm.nih.gov/genomes/all/GCA/003/990/355/GCA_003990355.1_ASM399035v1
Bordetella trematum	123899	Proteobacteria	Betaproteobacteria	65.5	Complete Genome	ftp://ftp.ncbi.nlm.nih.gov/genomes/all/GCA/003/991/115/GCA_003991115.1_ASM399111v1
Bordetella sp. J329	1977852	Proteobacteria	Betaproteobacteria	62.3	Complete Genome	ftp://ftp.ncbi.nlm.nih.gov/genomes/all/GCA/004/006/215/GCA_004006215.1_ASM400621v1
Bordetella avium	521	Proteobacteria	Betaproteobacteria	61.6	Complete Genome	ftp://ftp.ncbi.nlm.nih.gov/genomes/all/GCA/004/009/755/GCA_004009755.1_ASM400975v1
Pusillimonas sp. ye3	2028345	Proteobacteria	Betaproteobacteria	59.3	Complete Genome	ftp://ftp.ncbi.nlm.nih.gov/genomes/all/GCA/004/022/565/GCA_004022565.1_ASM402256v1
Janthinobacterium sp. 17J80-10	2497863	Proteobacteria	Betaproteobacteria	59.6	Complete Genome	ftp://ftp.ncbi.nlm.nih.gov/genomes/all/GCA/004/114/795/GCA_004114795.1_ASM411479v1
Methylibium sp. Pch-M	2082386	Proteobacteria	Betaproteobacteria	69.6	Complete Genome	ftp://ftp.ncbi.nlm.nih.gov/genomes/all/GCA/004/136/295/GCA_004136295.1_ASM413629v1
Pandoraea sp. XY-2	2518599	Proteobacteria	Betaproteobacteria	63.8	Complete Genome	ftp://ftp.ncbi.nlm.nih.gov/genomes/all/GCA/004/193/915/GCA_004193915.1_ASM419391v1
Massilia albidiflava	321983	Proteobacteria	Betaproteobacteria	65.8	Complete Genome	ftp://ftp.ncbi.nlm.nih.gov/genomes/all/GCA/004/322/755/GCA_004322755.1_ASM432275v1
Aquitalea sp. USM4	1590041	Proteobacteria	Betaproteobacteria	59.3612	Complete Genome	ftp://ftp.ncbi.nlm.nih.gov/genomes/all/GCA/004/328/945/GCA_004328945.1_ASM432894v1
Hydrogenophaga pseudoflava	47421	Proteobacteria	Betaproteobacteria	67.0484	Complete Genome	ftp://ftp.ncbi.nlm.nih.gov/genomes/all/GCA/004/353/865/GCA_004353865.1_ASM435386v1
Herbaspirillum huttiense	863372	Proteobacteria	Betaproteobacteria	62.3	Complete Genome	ftp://ftp.ncbi.nlm.nih.gov/genomes/all/GCA/004/367/745/GCA_004367745.1_ASM436774v1
Massilia plicata	321984	Proteobacteria	Betaproteobacteria	65	Complete Genome	ftp://ftp.ncbi.nlm.nih.gov/genomes/all/GCA/004/421/005/GCA_004421005.1_ASM442100v1
Kerstersia gyiorum	206506	Proteobacteria	Betaproteobacteria	62.4	Complete Genome	ftp://ftp.ncbi.nlm.nih.gov/genomes/all/GCA/004/551/665/GCA_004551665.1_ASM455166v1
Cupriavidus oxalaticus	96344	Proteobacteria	Betaproteobacteria	65.7497	Complete Genome	ftp://ftp.ncbi.nlm.nih.gov/genomes/all/GCA/004/768/545/GCA_004768545.1_ASM476854v1
Hydrogenophaga sp. PAMC20947	2565558	Proteobacteria	Betaproteobacteria	61.9	Complete Genome	ftp://ftp.ncbi.nlm.nih.gov/genomes/all/GCA/004/795/855/GCA_004795855.1_ASM479585v1
Cupriavidus necator H16	381666	Proteobacteria	Betaproteobacteria	66.3617	Complete Genome	ftp://ftp.ncbi.nlm.nih.gov/genomes/all/GCA/004/798/725/GCA_004798725.1_ASM479872v1
Neisseria flavescens	484	Proteobacteria	Betaproteobacteria	49	Complete Genome	ftp://ftp.ncbi.nlm.nih.gov/genomes/all/GCA/005/221/285/GCA_005221285.1_ASM522128v1
Neisseria subflava	28449	Proteobacteria	Betaproteobacteria	49.5	Complete Genome	ftp://ftp.ncbi.nlm.nih.gov/genomes/all/GCA/005/221/305/GCA_005221305.1_ASM522130v1
Massilia umbonata	864828	Proteobacteria	Betaproteobacteria	65.3	Complete Genome	ftp://ftp.ncbi.nlm.nih.gov/genomes/all/GCA/005/280/315/GCA_005280315.1_ASM528031v1
Burkholderia sp. DHOD12	2571746	Proteobacteria	Betaproteobacteria	63.0615	Complete Genome	ftp://ftp.ncbi.nlm.nih.gov/genomes/all/GCA/005/280/735/GCA_005280735.1_ASM528073v1
Burkholderia sp. KBS0801	1179675	Proteobacteria	Betaproteobacteria	66.6422	Complete Genome	ftp://ftp.ncbi.nlm.nih.gov/genomes/all/GCA/005/937/855/GCA_005937855.2_ASM593785v2
Burkholderia cepacia ATCC 25416	983594	Proteobacteria	Betaproteobacteria	66.5729	Complete Genome	ftp://ftp.ncbi.nlm.nih.gov/genomes/all/GCA/006/094/315/GCA_006094315.1_ASM609431v1
Sutterella sp. KGMB03119	2584944	Proteobacteria	Betaproteobacteria	58.3	Complete Genome	ftp://ftp.ncbi.nlm.nih.gov/genomes/all/GCA/006/337/085/GCA_006337085.1_ASM633708v1
Herbaspirillum seropedicae	964	Proteobacteria	Betaproteobacteria	63.0936	Complete Genome	ftp://ftp.ncbi.nlm.nih.gov/genomes/all/GCA/006/378/125/GCA_006378125.1_ASM637812v1
Azoarcus sp. DD4	2027405	Proteobacteria	Betaproteobacteria	66.7	Complete Genome	ftp://ftp.ncbi.nlm.nih.gov/genomes/all/GCA/006/496/635/GCA_006496635.1_ASM649663v1
Janthinobacterium sp. SNU WT3	2590869	Proteobacteria	Betaproteobacteria	62.4	Complete Genome	ftp://ftp.ncbi.nlm.nih.gov/genomes/all/GCA/006/517/255/GCA_006517255.1_ASM651725v1
Comamonas terrigena NBRC 13299	1219032	Proteobacteria	Betaproteobacteria	65	Complete Genome	ftp://ftp.ncbi.nlm.nih.gov/genomes/all/GCA/006/740/045/GCA_006740045.1_ASM674004v1
Nitrosomonas stercoris	1444684	Proteobacteria	Betaproteobacteria	44.8387	Complete Genome	ftp://ftp.ncbi.nlm.nih.gov/genomes/all/GCA/006/742/785/GCA_006742785.1_ASM674278v1
Rhodoferax sp. CHu59-6-5	2509614	Proteobacteria	Betaproteobacteria	64.3	Complete Genome	ftp://ftp.ncbi.nlm.nih.gov/genomes/all/GCA/006/970/865/GCA_006970865.1_ASM697086v1
Rhodoferax sp. Gr-4	2527691	Proteobacteria	Betaproteobacteria	57.4	Complete Genome	ftp://ftp.ncbi.nlm.nih.gov/genomes/all/GCA/006/974/105/GCA_006974105.1_ASM697410v1
Paraburkholderia megapolitana	420953	Proteobacteria	Betaproteobacteria	62.0351	Complete Genome	ftp://ftp.ncbi.nlm.nih.gov/genomes/all/GCA/007/556/815/GCA_007556815.1_ASM755681v1
Alcaligenaceae bacterium SJ-26	2593958	Proteobacteria	Betaproteobacteria	61.1	Complete Genome	ftp://ftp.ncbi.nlm.nih.gov/genomes/all/GCA/007/556/835/GCA_007556835.1_ASM755683v1
Burkholderia contaminans	488447	Proteobacteria	Betaproteobacteria	66.0555	Complete Genome	ftp://ftp.ncbi.nlm.nih.gov/genomes/all/GCA/007/724/625/GCA_007724625.1_ASM772462v1
Oxalobacter formigenes	847	Proteobacteria	Betaproteobacteria	49.6	Complete Genome	ftp://ftp.ncbi.nlm.nih.gov/genomes/all/GCA/007/833/235/GCA_007833235.1_ASM783323v1
Noviherbaspirillum sp. UKPF54	2601898	Proteobacteria	Betaproteobacteria	61.9	Complete Genome	ftp://ftp.ncbi.nlm.nih.gov/genomes/all/GCA/007/874/125/GCA_007874125.1_ASM787412v1
Comamonas sp. NLF 7-7	2597701	Proteobacteria	Betaproteobacteria	67.8	Complete Genome	ftp://ftp.ncbi.nlm.nih.gov/genomes/all/GCA/007/954/405/GCA_007954405.1_ASM795440v1
Achromobacter insolitus	217204	Proteobacteria	Betaproteobacteria	65.2	Complete Genome	ftp://ftp.ncbi.nlm.nih.gov/genomes/all/GCA/008/245/125/GCA_008245125.1_ASM824512v1
Candidatus Tremblaya princeps	189385	Proteobacteria	Betaproteobacteria	58.9	Complete Genome	ftp://ftp.ncbi.nlm.nih.gov/genomes/all/GCA/900/010/175/GCA_900010175.1_TPPLON
Orrella dioscoreae	1851544	Proteobacteria	Betaproteobacteria	67.4	Complete Genome	ftp://ftp.ncbi.nlm.nih.gov/genomes/all/GCA/900/089/455/GCA_900089455.2_OrrDiv2
Pandoraea sputorum	93222	Proteobacteria	Betaproteobacteria	62.8	Complete Genome	ftp://ftp.ncbi.nlm.nih.gov/genomes/all/GCA/900/187/205/GCA_900187205.1_52191_D01
Neisseria zoodegmatis	326523	Proteobacteria	Betaproteobacteria	50.9	Complete Genome	ftp://ftp.ncbi.nlm.nih.gov/genomes/all/GCA/900/187/305/GCA_900187305.1_51470_F02
Neisseria cinerea	483	Proteobacteria	Betaproteobacteria	50.9	Complete Genome	ftp://ftp.ncbi.nlm.nih.gov/genomes/all/GCA/900/475/315/GCA_900475315.1_43721_G02
Paucimonas lemoignei	29443	Proteobacteria	Betaproteobacteria	58.9	Complete Genome	ftp://ftp.ncbi.nlm.nih.gov/genomes/all/GCA/900/475/325/GCA_900475325.1_43222_E01
Neisseria elongata subsp. glycolytica	88719	Proteobacteria	Betaproteobacteria	54.3	Complete Genome	ftp://ftp.ncbi.nlm.nih.gov/genomes/all/GCA/900/475/815/GCA_900475815.1_46758_G01
Kingella kingae	504	Proteobacteria	Betaproteobacteria	46.6	Complete Genome	ftp://ftp.ncbi.nlm.nih.gov/genomes/all/GCA/900/475/905/GCA_900475905.1_49595_E01
Chromobacterium violaceum	536	Proteobacteria	Betaproteobacteria	64.9	Complete Genome	ftp://ftp.ncbi.nlm.nih.gov/genomes/all/GCA/900/635/845/GCA_900635845.1_35377_D01
Neisseria animalis	492	Proteobacteria	Betaproteobacteria	51.9	Complete Genome	ftp://ftp.ncbi.nlm.nih.gov/genomes/all/GCA/900/636/515/GCA_900636515.1_42685_A01
Achromobacter spanius	217203	Proteobacteria	Betaproteobacteria	64.3	Complete Genome	ftp://ftp.ncbi.nlm.nih.gov/genomes/all/GCA/900/636/675/GCA_900636675.1_43781_F01
Neisseria canis	493	Proteobacteria	Betaproteobacteria	49.7	Complete Genome	ftp://ftp.ncbi.nlm.nih.gov/genomes/all/GCA/900/636/765/GCA_900636765.1_44503_A02
Lautropia mirabilis	47671	Proteobacteria	Betaproteobacteria	65.5	Complete Genome	ftp://ftp.ncbi.nlm.nih.gov/genomes/all/GCA/900/637/555/GCA_900637555.1_51726_E01
Neisseria animaloris	326522	Proteobacteria	Betaproteobacteria	49.5	Complete Genome	ftp://ftp.ncbi.nlm.nih.gov/genomes/all/GCA/900/638/345/GCA_900638345.1_57428_C01
Neisseria weaveri	28091	Proteobacteria	Betaproteobacteria	49.1	Complete Genome	ftp://ftp.ncbi.nlm.nih.gov/genomes/all/GCA/900/638/685/GCA_900638685.1_58882_C02
Neisseria lactamica	486	Proteobacteria	Betaproteobacteria	52.1	Complete Genome	ftp://ftp.ncbi.nlm.nih.gov/genomes/all/GCA/901/482/445/GCA_901482445.1_45076_H02
Helicobacter hepaticus ATCC 51449	235279	Proteobacteria	delta/epsilon subdivisions	35.9	Complete Genome	ftp://ftp.ncbi.nlm.nih.gov/genomes/all/GCA/000/007/905/GCA_000007905.1_ASM790v1
Geobacter sulfurreducens PCA	243231	Proteobacteria	delta/epsilon subdivisions	60.9	Complete Genome	ftp://ftp.ncbi.nlm.nih.gov/genomes/all/GCA/000/007/985/GCA_000007985.2_ASM798v2
Campylobacter jejuni subsp. jejuni NCTC 11168 = ATCC 700819	192222	Proteobacteria	delta/epsilon subdivisions	30.5	Complete Genome	ftp://ftp.ncbi.nlm.nih.gov/genomes/all/GCA/000/009/085/GCA_000009085.1_ASM908v1
Helicobacter acinonychis str. Sheeba	382638	Proteobacteria	delta/epsilon subdivisions	38.1915	Complete Genome	ftp://ftp.ncbi.nlm.nih.gov/genomes/all/GCA/000/009/305/GCA_000009305.1_ASM930v1
Nitratiruptor sp. SB155-2	387092	Proteobacteria	delta/epsilon subdivisions	39.7	Complete Genome	ftp://ftp.ncbi.nlm.nih.gov/genomes/all/GCA/000/010/325/GCA_000010325.1_ASM1032v1
Sulfurovum sp. NBC37-1	387093	Proteobacteria	delta/epsilon subdivisions	43.9	Complete Genome	ftp://ftp.ncbi.nlm.nih.gov/genomes/all/GCA/000/010/345/GCA_000010345.1_ASM1034v1
Desulfovibrio magneticus RS-1	573370	Proteobacteria	delta/epsilon subdivisions	62.7043	Complete Genome	ftp://ftp.ncbi.nlm.nih.gov/genomes/all/GCA/000/010/665/GCA_000010665.1_ASM1066v1
Helicobacter pylori 51	290847	Proteobacteria	delta/epsilon subdivisions	38.8	Complete Genome	ftp://ftp.ncbi.nlm.nih.gov/genomes/all/GCA/000/011/725/GCA_000011725.1_ASM1172v1
Campylobacter jejuni RM1221	195099	Proteobacteria	delta/epsilon subdivisions	30.3	Complete Genome	ftp://ftp.ncbi.nlm.nih.gov/genomes/all/GCA/000/011/865/GCA_000011865.1_ASM1186v1
Desulfovibrio alaskensis G20	207559	Proteobacteria	delta/epsilon subdivisions	57.8	Complete Genome	ftp://ftp.ncbi.nlm.nih.gov/genomes/all/GCA/000/012/665/GCA_000012665.1_ASM1266v1
Myxococcus xanthus DK 1622	246197	Proteobacteria	delta/epsilon subdivisions	68.9	Complete Genome	ftp://ftp.ncbi.nlm.nih.gov/genomes/all/GCA/000/012/685/GCA_000012685.1_ASM1268v1
Pelobacter carbinolicus DSM 2380	338963	Proteobacteria	delta/epsilon subdivisions	55.1	Complete Genome	ftp://ftp.ncbi.nlm.nih.gov/genomes/all/GCA/000/012/885/GCA_000012885.1_ASM1288v1
Geobacter metallireducens GS-15	269799	Proteobacteria	delta/epsilon subdivisions	59.476	Complete Genome	ftp://ftp.ncbi.nlm.nih.gov/genomes/all/GCA/000/012/925/GCA_000012925.1_ASM1292v1
Sulfurimonas denitrificans DSM 1251	326298	Proteobacteria	delta/epsilon subdivisions	34.5	Complete Genome	ftp://ftp.ncbi.nlm.nih.gov/genomes/all/GCA/000/012/965/GCA_000012965.1_ASM1296v1
Helicobacter pylori HPAG1	357544	Proteobacteria	delta/epsilon subdivisions	39.0842	Complete Genome	ftp://ftp.ncbi.nlm.nih.gov/genomes/all/GCA/000/013/245/GCA_000013245.1_ASM1324v1
Anaeromyxobacter dehalogenans 2CP-C	290397	Proteobacteria	delta/epsilon subdivisions	74.9	Complete Genome	ftp://ftp.ncbi.nlm.nih.gov/genomes/all/GCA/000/013/385/GCA_000013385.1_ASM1338v1
Syntrophus aciditrophicus SB	56780	Proteobacteria	delta/epsilon subdivisions	51.5	Complete Genome	ftp://ftp.ncbi.nlm.nih.gov/genomes/all/GCA/000/013/405/GCA_000013405.1_ASM1340v1
Arcobacter butzleri RM4018	367737	Proteobacteria	delta/epsilon subdivisions	27	Complete Genome	ftp://ftp.ncbi.nlm.nih.gov/genomes/all/GCA/000/014/025/GCA_000014025.1_ASM1402v1
Syntrophobacter fumaroxidans MPOB	335543	Proteobacteria	delta/epsilon subdivisions	59.9	Complete Genome	ftp://ftp.ncbi.nlm.nih.gov/genomes/all/GCA/000/014/965/GCA_000014965.1_ASM1496v1
Pelobacter propionicus DSM 2379	338966	Proteobacteria	delta/epsilon subdivisions	58.4603	Complete Genome	ftp://ftp.ncbi.nlm.nih.gov/genomes/all/GCA/000/015/045/GCA_000015045.1_ASM1504v1
Campylobacter fetus subsp. fetus 82-40	360106	Proteobacteria	delta/epsilon subdivisions	33.3	Complete Genome	ftp://ftp.ncbi.nlm.nih.gov/genomes/all/GCA/000/015/085/GCA_000015085.1_ASM1508v1
Desulfovibrio vulgaris DP4	391774	Proteobacteria	delta/epsilon subdivisions	63.1464	Complete Genome	ftp://ftp.ncbi.nlm.nih.gov/genomes/all/GCA/000/015/485/GCA_000015485.1_ASM1548v1
Campylobacter jejuni subsp. jejuni 81-176	354242	Proteobacteria	delta/epsilon subdivisions	30.4566	Complete Genome	ftp://ftp.ncbi.nlm.nih.gov/genomes/all/GCA/000/015/525/GCA_000015525.1_ASM1552v1
Geobacter uraniireducens Rf4	351605	Proteobacteria	delta/epsilon subdivisions	54.2	Complete Genome	ftp://ftp.ncbi.nlm.nih.gov/genomes/all/GCA/000/016/745/GCA_000016745.1_ASM1674v1
Campylobacter curvus 525.92	360105	Proteobacteria	delta/epsilon subdivisions	44.5	Complete Genome	ftp://ftp.ncbi.nlm.nih.gov/genomes/all/GCA/000/017/465/GCA_000017465.2_ASM1746v2
Campylobacter jejuni subsp. doylei 269.97	360109	Proteobacteria	delta/epsilon subdivisions	30.6	Complete Genome	ftp://ftp.ncbi.nlm.nih.gov/genomes/all/GCA/000/017/485/GCA_000017485.1_ASM1748v1
Anaeromyxobacter sp. Fw109-5	404589	Proteobacteria	delta/epsilon subdivisions	73.5	Complete Genome	ftp://ftp.ncbi.nlm.nih.gov/genomes/all/GCA/000/017/505/GCA_000017505.1_ASM1750v1
Campylobacter hominis ATCC BAA-381	360107	Proteobacteria	delta/epsilon subdivisions	31.7051	Complete Genome	ftp://ftp.ncbi.nlm.nih.gov/genomes/all/GCA/000/017/585/GCA_000017585.1_ASM1758v1
Campylobacter concisus 13826	360104	Proteobacteria	delta/epsilon subdivisions	39.2388	Complete Genome	ftp://ftp.ncbi.nlm.nih.gov/genomes/all/GCA/000/017/725/GCA_000017725.2_ASM1772v2
Campylobacter jejuni subsp. jejuni 81116	407148	Proteobacteria	delta/epsilon subdivisions	30.5	Complete Genome	ftp://ftp.ncbi.nlm.nih.gov/genomes/all/GCA/000/017/905/GCA_000017905.1_ASM1790v1
Desulfococcus oleovorans Hxd3	96561	Proteobacteria	delta/epsilon subdivisions	56.2	Complete Genome	ftp://ftp.ncbi.nlm.nih.gov/genomes/all/GCA/000/018/405/GCA_000018405.1_ASM1840v1
Campylobacter lari RM2100	306263	Proteobacteria	delta/epsilon subdivisions	29.6177	Complete Genome	ftp://ftp.ncbi.nlm.nih.gov/genomes/all/GCA/000/019/205/GCA_000019205.1_ASM1920v1
Helicobacter pylori Shi470	512562	Proteobacteria	delta/epsilon subdivisions	38.9	Complete Genome	ftp://ftp.ncbi.nlm.nih.gov/genomes/all/GCA/000/020/245/GCA_000020245.1_ASM2024v1
Desulfobacterium autotrophicum HRM2	177437	Proteobacteria	delta/epsilon subdivisions	48.7174	Complete Genome	ftp://ftp.ncbi.nlm.nih.gov/genomes/all/GCA/000/020/365/GCA_000020365.1_ASM2036v1
Geobacter lovleyi SZ	398767	Proteobacteria	delta/epsilon subdivisions	54.7653	Complete Genome	ftp://ftp.ncbi.nlm.nih.gov/genomes/all/GCA/000/020/385/GCA_000020385.1_ASM2038v1
Geobacter bemidjiensis Bem	404380	Proteobacteria	delta/epsilon subdivisions	60.3	Complete Genome	ftp://ftp.ncbi.nlm.nih.gov/genomes/all/GCA/000/020/725/GCA_000020725.1_ASM2072v1
Anaeromyxobacter sp. K	447217	Proteobacteria	delta/epsilon subdivisions	74.8	Complete Genome	ftp://ftp.ncbi.nlm.nih.gov/genomes/all/GCA/000/020/805/GCA_000020805.1_ASM2080v1
Helicobacter pylori G27	563041	Proteobacteria	delta/epsilon subdivisions	38.8759	Complete Genome	ftp://ftp.ncbi.nlm.nih.gov/genomes/all/GCA/000/021/165/GCA_000021165.1_ASM2116v1
Desulfovibrio vulgaris str. 'Miyazaki F'	883	Proteobacteria	delta/epsilon subdivisions	67.1	Complete Genome	ftp://ftp.ncbi.nlm.nih.gov/genomes/all/GCA/000/021/385/GCA_000021385.1_ASM2138v1
Helicobacter pylori P12	570508	Proteobacteria	delta/epsilon subdivisions	38.7775	Complete Genome	ftp://ftp.ncbi.nlm.nih.gov/genomes/all/GCA/000/021/465/GCA_000021465.1_ASM2146v1
Nautilia profundicola AmH	598659	Proteobacteria	delta/epsilon subdivisions	33.5	Complete Genome	ftp://ftp.ncbi.nlm.nih.gov/genomes/all/GCA/000/021/725/GCA_000021725.1_ASM2172v1
Desulfatibacillum aliphaticivorans	218208	Proteobacteria	delta/epsilon subdivisions	54.5	Complete Genome	ftp://ftp.ncbi.nlm.nih.gov/genomes/all/GCA/000/021/905/GCA_000021905.1_ASM2190v1
Desulfovibrio desulfuricans ATCC 27774	525146	Proteobacteria	delta/epsilon subdivisions	58.1	Complete Genome	ftp://ftp.ncbi.nlm.nih.gov/genomes/all/GCA/000/022/125/GCA_000022125.1_ASM2212v1
Anaeromyxobacter dehalogenans 2CP-1	455488	Proteobacteria	delta/epsilon subdivisions	74.7	Complete Genome	ftp://ftp.ncbi.nlm.nih.gov/genomes/all/GCA/000/022/145/GCA_000022145.1_ASM2214v1
Geobacter daltonii FRC-32	316067	Proteobacteria	delta/epsilon subdivisions	53.5	Complete Genome	ftp://ftp.ncbi.nlm.nih.gov/genomes/all/GCA/000/022/265/GCA_000022265.1_ASM2226v1
Desulfomicrobium baculatum DSM 4028	525897	Proteobacteria	delta/epsilon subdivisions	58.6	Complete Genome	ftp://ftp.ncbi.nlm.nih.gov/genomes/all/GCA/000/023/225/GCA_000023225.1_ASM2322v1
Desulfovibrio salexigens DSM 2638	526222	Proteobacteria	delta/epsilon subdivisions	47.1	Complete Genome	ftp://ftp.ncbi.nlm.nih.gov/genomes/all/GCA/000/023/445/GCA_000023445.1_ASM2344v1
Geobacter sp. M21	443144	Proteobacteria	delta/epsilon subdivisions	60.5	Complete Genome	ftp://ftp.ncbi.nlm.nih.gov/genomes/all/GCA/000/023/645/GCA_000023645.1_ASM2364v1
Helicobacter pylori 52	684950	Proteobacteria	delta/epsilon subdivisions	38.9	Complete Genome	ftp://ftp.ncbi.nlm.nih.gov/genomes/all/GCA/000/023/805/GCA_000023805.1_ASM2380v1
Desulfohalobium retbaense DSM 5692	485915	Proteobacteria	delta/epsilon subdivisions	57.2915	Complete Genome	ftp://ftp.ncbi.nlm.nih.gov/genomes/all/GCA/000/024/325/GCA_000024325.1_ASM2432v1
Haliangium ochraceum DSM 14365	502025	Proteobacteria	delta/epsilon subdivisions	69.5	Complete Genome	ftp://ftp.ncbi.nlm.nih.gov/genomes/all/GCA/000/024/805/GCA_000024805.1_ASM2480v1
Sulfurospirillum deleyianum DSM 6946	525898	Proteobacteria	delta/epsilon subdivisions	39	Complete Genome	ftp://ftp.ncbi.nlm.nih.gov/genomes/all/GCA/000/024/885/GCA_000024885.1_ASM2488v1
Campylobacter jejuni subsp. jejuni IA3902	567106	Proteobacteria	delta/epsilon subdivisions	30.4955	Complete Genome	ftp://ftp.ncbi.nlm.nih.gov/genomes/all/GCA/000/025/425/GCA_000025425.1_ASM2542v1
Desulfotalea psychrophila LSv54	177439	Proteobacteria	delta/epsilon subdivisions	46.6208	Complete Genome	ftp://ftp.ncbi.nlm.nih.gov/genomes/all/GCA/000/025/945/GCA_000025945.1_ASM2594v1
Lawsonia intracellularis PHE/MN1-00	363253	Proteobacteria	delta/epsilon subdivisions	33.0922	Complete Genome	ftp://ftp.ncbi.nlm.nih.gov/genomes/all/GCA/000/055/945/GCA_000055945.1_ASM5594v1
Sorangium cellulosum So ce56	448385	Proteobacteria	delta/epsilon subdivisions	71.4	Complete Genome	ftp://ftp.ncbi.nlm.nih.gov/genomes/all/GCA/000/067/165/GCA_000067165.1_ASM6716v1
Helicobacter pylori B38	592205	Proteobacteria	delta/epsilon subdivisions	39.2	Complete Genome	ftp://ftp.ncbi.nlm.nih.gov/genomes/all/GCA/000/091/345/GCA_000091345.1_ASM9134v1
Helicobacter mustelae 12198	679897	Proteobacteria	delta/epsilon subdivisions	42.5	Complete Genome	ftp://ftp.ncbi.nlm.nih.gov/genomes/all/GCA/000/091/985/GCA_000091985.1_ASM9198v1
Desulfurivibrio alkaliphilus AHT 2	589865	Proteobacteria	delta/epsilon subdivisions	60.3	Complete Genome	ftp://ftp.ncbi.nlm.nih.gov/genomes/all/GCA/000/092/205/GCA_000092205.1_ASM9220v1
Arcobacter nitrofigilis DSM 7299	572480	Proteobacteria	delta/epsilon subdivisions	28.4	Complete Genome	ftp://ftp.ncbi.nlm.nih.gov/genomes/all/GCA/000/092/245/GCA_000092245.1_ASM9224v1
Helicobacter pylori v225d	637913	Proteobacteria	delta/epsilon subdivisions	38.972	Complete Genome	ftp://ftp.ncbi.nlm.nih.gov/genomes/all/GCA/000/093/185/GCA_000093185.1_ASM9318v1
Desulfarculus baarsii DSM 2075	644282	Proteobacteria	delta/epsilon subdivisions	65.7	Complete Genome	ftp://ftp.ncbi.nlm.nih.gov/genomes/all/GCA/000/143/965/GCA_000143965.1_ASM14396v1
Sulfurimonas autotrophica DSM 16294	563040	Proteobacteria	delta/epsilon subdivisions	35.2	Complete Genome	ftp://ftp.ncbi.nlm.nih.gov/genomes/all/GCA/000/147/355/GCA_000147355.1_ASM14735v1
Helicobacter pylori 908	869727	Proteobacteria	delta/epsilon subdivisions	39.3	Complete Genome	ftp://ftp.ncbi.nlm.nih.gov/genomes/all/GCA/000/148/665/GCA_000148665.1_ASM14866v1
Campylobacter jejuni subsp. jejuni M1	645464	Proteobacteria	delta/epsilon subdivisions	30.6	Complete Genome	ftp://ftp.ncbi.nlm.nih.gov/genomes/all/GCA/000/148/705/GCA_000148705.1_ASM14870v1
Helicobacter pylori SJM180	765962	Proteobacteria	delta/epsilon subdivisions	38.9	Complete Genome	ftp://ftp.ncbi.nlm.nih.gov/genomes/all/GCA/000/148/855/GCA_000148855.1_ASM14885v1
Helicobacter pylori PeCan4	765963	Proteobacteria	delta/epsilon subdivisions	38.8681	Complete Genome	ftp://ftp.ncbi.nlm.nih.gov/genomes/all/GCA/000/148/875/GCA_000148875.1_ASM14887v1
Helicobacter pylori Cuz20	765964	Proteobacteria	delta/epsilon subdivisions	38.9	Complete Genome	ftp://ftp.ncbi.nlm.nih.gov/genomes/all/GCA/000/148/895/GCA_000148895.1_ASM14889v1
Helicobacter pylori Sat464	794851	Proteobacteria	delta/epsilon subdivisions	39.0742	Complete Genome	ftp://ftp.ncbi.nlm.nih.gov/genomes/all/GCA/000/148/915/GCA_000148915.1_ASM14891v1
Stigmatella aurantiaca DW4/3-1	378806	Proteobacteria	delta/epsilon subdivisions	67.5	Complete Genome	ftp://ftp.ncbi.nlm.nih.gov/genomes/all/GCA/000/165/485/GCA_000165485.1_ASM16548v1
Desulfovibrio vulgaris RCH1	573059	Proteobacteria	delta/epsilon subdivisions	63.2409	Complete Genome	ftp://ftp.ncbi.nlm.nih.gov/genomes/all/GCA/000/166/115/GCA_000166115.1_ASM16611v1
Campylobacter jejuni subsp. jejuni CG8421	478547	Proteobacteria	delta/epsilon subdivisions	30.5	Complete Genome	ftp://ftp.ncbi.nlm.nih.gov/genomes/all/GCA/000/171/795/GCA_000171795.2_ASM17179v2
Geobacter sp. M18	443143	Proteobacteria	delta/epsilon subdivisions	61.2	Complete Genome	ftp://ftp.ncbi.nlm.nih.gov/genomes/all/GCA/000/175/115/GCA_000175115.2_ASM17511v2
Pseudodesulfovibrio aespoeensis Aspo-2	643562	Proteobacteria	delta/epsilon subdivisions	62.6	Complete Genome	ftp://ftp.ncbi.nlm.nih.gov/genomes/all/GCA/000/176/915/GCA_000176915.2_ASM17691v2
Helicobacter pylori 35A	585535	Proteobacteria	delta/epsilon subdivisions	38.9	Complete Genome	ftp://ftp.ncbi.nlm.nih.gov/genomes/all/GCA/000/178/935/GCA_000178935.2_ASM17893v2
Sulfuricurvum kujiense DSM 16994	709032	Proteobacteria	delta/epsilon subdivisions	44.5704	Complete Genome	ftp://ftp.ncbi.nlm.nih.gov/genomes/all/GCA/000/183/725/GCA_000183725.1_ASM18372v1
Campylobacter jejuni subsp. jejuni ICDCCJ07001	757425	Proteobacteria	delta/epsilon subdivisions	30.551	Complete Genome	ftp://ftp.ncbi.nlm.nih.gov/genomes/all/GCA/000/184/085/GCA_000184085.1_ASM18408v1
Campylobacter jejuni subsp. jejuni S3	718271	Proteobacteria	delta/epsilon subdivisions	30.4624	Complete Genome	ftp://ftp.ncbi.nlm.nih.gov/genomes/all/GCA/000/184/205/GCA_000184205.1_ASM18420v1
Helicobacter pylori India7	907238	Proteobacteria	delta/epsilon subdivisions	38.9	Complete Genome	ftp://ftp.ncbi.nlm.nih.gov/genomes/all/GCA/000/185/185/GCA_000185185.1_ASM18518v1
Helicobacter pylori Gambia94/24	907240	Proteobacteria	delta/epsilon subdivisions	39.0975	Complete Genome	ftp://ftp.ncbi.nlm.nih.gov/genomes/all/GCA/000/185/205/GCA_000185205.1_ASM18520v1
Helicobacter pylori Lithuania75	907237	Proteobacteria	delta/epsilon subdivisions	38.8492	Complete Genome	ftp://ftp.ncbi.nlm.nih.gov/genomes/all/GCA/000/185/225/GCA_000185225.1_ASM18522v1
Helicobacter pylori SouthAfrica7	907239	Proteobacteria	delta/epsilon subdivisions	38.4259	Complete Genome	ftp://ftp.ncbi.nlm.nih.gov/genomes/all/GCA/000/185/245/GCA_000185245.1_ASM18524v1
Nitratifractor salsuginis DSM 16511	749222	Proteobacteria	delta/epsilon subdivisions	53.9	Complete Genome	ftp://ftp.ncbi.nlm.nih.gov/genomes/all/GCA/000/186/245/GCA_000186245.1_ASM18624v1
Desulfobulbus propionicus DSM 2032	577650	Proteobacteria	delta/epsilon subdivisions	58.9	Complete Genome	ftp://ftp.ncbi.nlm.nih.gov/genomes/all/GCA/000/186/885/GCA_000186885.1_ASM18688v1
Desulfovibrio desulfuricans ND132	641491	Proteobacteria	delta/epsilon subdivisions	65.2	Complete Genome	ftp://ftp.ncbi.nlm.nih.gov/genomes/all/GCA/000/189/295/GCA_000189295.2_ASM18929v2
Helicobacter pylori 2017	985081	Proteobacteria	delta/epsilon subdivisions	39.3	Complete Genome	ftp://ftp.ncbi.nlm.nih.gov/genomes/all/GCA/000/192/315/GCA_000192315.1_ASM19231v1
Helicobacter pylori 2018	985080	Proteobacteria	delta/epsilon subdivisions	39.3	Complete Genome	ftp://ftp.ncbi.nlm.nih.gov/genomes/all/GCA/000/192/335/GCA_000192335.1_ASM19233v1
Hippea maritima DSM 10411	760142	Proteobacteria	delta/epsilon subdivisions	37.5	Complete Genome	ftp://ftp.ncbi.nlm.nih.gov/genomes/all/GCA/000/194/135/GCA_000194135.1_ASM19413v1
Desulfobacca acetoxidans DSM 11109	880072	Proteobacteria	delta/epsilon subdivisions	52.9	Complete Genome	ftp://ftp.ncbi.nlm.nih.gov/genomes/all/GCA/000/195/295/GCA_000195295.1_ASM19529v1
Desulfovibrio vulgaris str. Hildenborough	882	Proteobacteria	delta/epsilon subdivisions	63.2394	Complete Genome	ftp://ftp.ncbi.nlm.nih.gov/genomes/all/GCA/000/195/755/GCA_000195755.1_ASM19575v1
Wolinella succinogenes DSM 1740	273121	Proteobacteria	delta/epsilon subdivisions	48.5	Complete Genome	ftp://ftp.ncbi.nlm.nih.gov/genomes/all/GCA/000/196/135/GCA_000196135.1_ASM19613v1
Helicobacter pylori B8	693745	Proteobacteria	delta/epsilon subdivisions	38.7896	Complete Genome	ftp://ftp.ncbi.nlm.nih.gov/genomes/all/GCA/000/196/755/GCA_000196755.1_ASM19675v1
Helicobacter felis ATCC 49179	936155	Proteobacteria	delta/epsilon subdivisions	44.5	Complete Genome	ftp://ftp.ncbi.nlm.nih.gov/genomes/all/GCA/000/200/595/GCA_000200595.1_ASM20059v1
Geobacter sulfurreducens KN400	663917	Proteobacteria	delta/epsilon subdivisions	61	Complete Genome	ftp://ftp.ncbi.nlm.nih.gov/genomes/all/GCA/000/210/155/GCA_000210155.1_ASM21015v1
Desulfocurvibacter africanus subsp. africanus str. Walvis Bay	690850	Proteobacteria	delta/epsilon subdivisions	61.4	Complete Genome	ftp://ftp.ncbi.nlm.nih.gov/genomes/all/GCA/000/212/675/GCA_000212675.2_ASM21267v2
Helicobacter pylori 83	585538	Proteobacteria	delta/epsilon subdivisions	38.7	Complete Genome	ftp://ftp.ncbi.nlm.nih.gov/genomes/all/GCA/000/213/135/GCA_000213135.1_ASM21313v1
Arcobacter butzleri 7h1h	1036172	Proteobacteria	delta/epsilon subdivisions	27.1	Complete Genome	ftp://ftp.ncbi.nlm.nih.gov/genomes/all/GCA/000/215/345/GCA_000215345.3_ASM21534v3
Myxococcus macrosporus	35	Proteobacteria	delta/epsilon subdivisions	70.6	Complete Genome	ftp://ftp.ncbi.nlm.nih.gov/genomes/all/GCA/000/219/105/GCA_000219105.1_ASM21910v1
Helicobacter pylori Puno120	1055528	Proteobacteria	delta/epsilon subdivisions	38.8758	Complete Genome	ftp://ftp.ncbi.nlm.nih.gov/genomes/all/GCA/000/224/535/GCA_000224535.1_ASM22453v1
Helicobacter pylori Puno135	1055529	Proteobacteria	delta/epsilon subdivisions	38.8	Complete Genome	ftp://ftp.ncbi.nlm.nih.gov/genomes/all/GCA/000/224/555/GCA_000224555.1_ASM22455v1
Helicobacter pylori SNT49	1055530	Proteobacteria	delta/epsilon subdivisions	38.9968	Complete Genome	ftp://ftp.ncbi.nlm.nih.gov/genomes/all/GCA/000/224/575/GCA_000224575.1_ASM22457v1
Corallococcus coralloides DSM 2259	1144275	Proteobacteria	delta/epsilon subdivisions	69.9	Complete Genome	ftp://ftp.ncbi.nlm.nih.gov/genomes/all/GCA/000/255/295/GCA_000255295.1_ASM25529v1
Helicobacter pylori ELS37	1055527	Proteobacteria	delta/epsilon subdivisions	38.8905	Complete Genome	ftp://ftp.ncbi.nlm.nih.gov/genomes/all/GCA/000/255/955/GCA_000255955.1_ASM25595v1
Helicobacter pylori HUP-B14	1163743	Proteobacteria	delta/epsilon subdivisions	39.0866	Complete Genome	ftp://ftp.ncbi.nlm.nih.gov/genomes/all/GCA/000/259/235/GCA_000259235.1_ASM25923v1
Helicobacter cetorum MIT 00-7128	182217	Proteobacteria	delta/epsilon subdivisions	34.5	Complete Genome	ftp://ftp.ncbi.nlm.nih.gov/genomes/all/GCA/000/259/255/GCA_000259255.1_ASM25925v1
Helicobacter cetorum MIT 99-5656	1163745	Proteobacteria	delta/epsilon subdivisions	35.5778	Complete Genome	ftp://ftp.ncbi.nlm.nih.gov/genomes/all/GCA/000/259/275/GCA_000259275.1_ASM25927v1
Helicobacter pylori XZ274	1127122	Proteobacteria	delta/epsilon subdivisions	38.6067	Complete Genome	ftp://ftp.ncbi.nlm.nih.gov/genomes/all/GCA/000/262/655/GCA_000262655.1_ASM26265v1
Sulfurospirillum barnesii SES-3	760154	Proteobacteria	delta/epsilon subdivisions	38.8	Complete Genome	ftp://ftp.ncbi.nlm.nih.gov/genomes/all/GCA/000/265/295/GCA_000265295.1_ASM26529v1
Desulfomonile tiedjei DSM 6799	706587	Proteobacteria	delta/epsilon subdivisions	50.1107	Complete Genome	ftp://ftp.ncbi.nlm.nih.gov/genomes/all/GCA/000/266/945/GCA_000266945.1_ASM26694v1
Helicobacter pylori F16	866344	Proteobacteria	delta/epsilon subdivisions	38.9	Complete Genome	ftp://ftp.ncbi.nlm.nih.gov/genomes/all/GCA/000/270/005/GCA_000270005.1_ASM27000v1
Helicobacter pylori F30	866345	Proteobacteria	delta/epsilon subdivisions	38.7728	Complete Genome	ftp://ftp.ncbi.nlm.nih.gov/genomes/all/GCA/000/270/025/GCA_000270025.1_ASM27002v1
Helicobacter pylori F32	102608	Proteobacteria	delta/epsilon subdivisions	38.8963	Complete Genome	ftp://ftp.ncbi.nlm.nih.gov/genomes/all/GCA/000/270/045/GCA_000270045.1_ASM27004v1
Helicobacter pylori F57	866346	Proteobacteria	delta/epsilon subdivisions	38.7	Complete Genome	ftp://ftp.ncbi.nlm.nih.gov/genomes/all/GCA/000/270/065/GCA_000270065.1_ASM27006v1
Helicobacter pylori Shi417	1163739	Proteobacteria	delta/epsilon subdivisions	38.8	Complete Genome	ftp://ftp.ncbi.nlm.nih.gov/genomes/all/GCA/000/277/365/GCA_000277365.1_ASM27736v1
Helicobacter pylori Shi169	1163741	Proteobacteria	delta/epsilon subdivisions	38.9	Complete Genome	ftp://ftp.ncbi.nlm.nih.gov/genomes/all/GCA/000/277/385/GCA_000277385.1_ASM27738v1
Helicobacter pylori Shi112	1163740	Proteobacteria	delta/epsilon subdivisions	38.8	Complete Genome	ftp://ftp.ncbi.nlm.nih.gov/genomes/all/GCA/000/277/405/GCA_000277405.1_ASM27740v1
Helicobacter pylori PeCan18	1163742	Proteobacteria	delta/epsilon subdivisions	39	Complete Genome	ftp://ftp.ncbi.nlm.nih.gov/genomes/all/GCA/000/277/425/GCA_000277425.1_ASM27742v1
Myxococcus hansupus	1297742	Proteobacteria	delta/epsilon subdivisions	69.2	Complete Genome	ftp://ftp.ncbi.nlm.nih.gov/genomes/all/GCA/000/280/925/GCA_000280925.3_ASM28092v3
Arcobacter sp. L	944547	Proteobacteria	delta/epsilon subdivisions	26.6135	Complete Genome	ftp://ftp.ncbi.nlm.nih.gov/genomes/all/GCA/000/284/235/GCA_000284235.1_ASM28423v1
Arcobacter butzleri ED-1	944546	Proteobacteria	delta/epsilon subdivisions	27.1	Complete Genome	ftp://ftp.ncbi.nlm.nih.gov/genomes/all/GCA/000/284/355/GCA_000284355.1_ASM28435v1
Helicobacter cinaedi PAGU611	1172562	Proteobacteria	delta/epsilon subdivisions	38.5221	Complete Genome	ftp://ftp.ncbi.nlm.nih.gov/genomes/all/GCA/000/284/635/GCA_000284635.1_ASM28463v1
Campylobacter jejuni subsp. jejuni PT14	1201032	Proteobacteria	delta/epsilon subdivisions	30.5	Complete Genome	ftp://ftp.ncbi.nlm.nih.gov/genomes/all/GCA/000/302/555/GCA_000302555.4_ASM30255v4
Campylobacter jejuni subsp. jejuni NCTC 11168-BN148	1211776	Proteobacteria	delta/epsilon subdivisions	30.5	Complete Genome	ftp://ftp.ncbi.nlm.nih.gov/genomes/all/GCA/000/304/375/GCA_000304375.1_AINO
Desulfobacula toluolica Tol2	651182	Proteobacteria	delta/epsilon subdivisions	41.4	Complete Genome	ftp://ftp.ncbi.nlm.nih.gov/genomes/all/GCA/000/307/105/GCA_000307105.1_ASM30710v1
Helicobacter pylori 26695	85962	Proteobacteria	delta/epsilon subdivisions	38.9	Complete Genome	ftp://ftp.ncbi.nlm.nih.gov/genomes/all/GCA/000/307/795/GCA_000307795.1_ASM30779v1
Helicobacter pylori Rif1	1234365	Proteobacteria	delta/epsilon subdivisions	38.9	Complete Genome	ftp://ftp.ncbi.nlm.nih.gov/genomes/all/GCA/000/307/815/GCA_000307815.1_ASM30781v1
Helicobacter pylori Rif2	1234600	Proteobacteria	delta/epsilon subdivisions	38.9	Complete Genome	ftp://ftp.ncbi.nlm.nih.gov/genomes/all/GCA/000/307/835/GCA_000307835.1_ASM30783v1
Helicobacter pylori Aklavik117	1055531	Proteobacteria	delta/epsilon subdivisions	38.7292	Complete Genome	ftp://ftp.ncbi.nlm.nih.gov/genomes/all/GCA/000/315/955/GCA_000315955.1_ASM31595v1
Helicobacter pylori Aklavik86	1055532	Proteobacteria	delta/epsilon subdivisions	39.253	Complete Genome	ftp://ftp.ncbi.nlm.nih.gov/genomes/all/GCA/000/317/875/GCA_000317875.1_ASM31787v1
Lawsonia intracellularis N343	1234378	Proteobacteria	delta/epsilon subdivisions	33.0918	Complete Genome	ftp://ftp.ncbi.nlm.nih.gov/genomes/all/GCA/000/331/715/GCA_000331715.1_ASM33171v1
Myxococcus stipitatus DSM 14675	1278073	Proteobacteria	delta/epsilon subdivisions	69.2	Complete Genome	ftp://ftp.ncbi.nlm.nih.gov/genomes/all/GCA/000/331/735/GCA_000331735.1_ASM33173v1
Desulfocapsa sulfexigens DSM 10523	1167006	Proteobacteria	delta/epsilon subdivisions	45.389	Complete Genome	ftp://ftp.ncbi.nlm.nih.gov/genomes/all/GCA/000/341/395/GCA_000341395.1_ASM34139v1
Helicobacter pylori OK113	1248725	Proteobacteria	delta/epsilon subdivisions	38.7	Complete Genome	ftp://ftp.ncbi.nlm.nih.gov/genomes/all/GCA/000/348/865/GCA_000348865.1_ASM34886v1
Helicobacter pylori OK310	1248726	Proteobacteria	delta/epsilon subdivisions	38.7937	Complete Genome	ftp://ftp.ncbi.nlm.nih.gov/genomes/all/GCA/000/348/885/GCA_000348885.1_ASM34888v1
Helicobacter cinaedi CCUG 18818 = ATCC BAA-847	537971	Proteobacteria	delta/epsilon subdivisions	38.3	Complete Genome	ftp://ftp.ncbi.nlm.nih.gov/genomes/all/GCA/000/349/975/GCA_000349975.1_ASM34997v1
Helicobacter pylori UM032	1311573	Proteobacteria	delta/epsilon subdivisions	38.8	Complete Genome	ftp://ftp.ncbi.nlm.nih.gov/genomes/all/GCA/000/392/455/GCA_000392455.3_ASM39245v3
Helicobacter pylori UM299	1321938	Proteobacteria	delta/epsilon subdivisions	38.8	Complete Genome	ftp://ftp.ncbi.nlm.nih.gov/genomes/all/GCA/000/392/475/GCA_000392475.3_ASM39247v3
Helicobacter pylori UM037	1321939	Proteobacteria	delta/epsilon subdivisions	38.9	Complete Genome	ftp://ftp.ncbi.nlm.nih.gov/genomes/all/GCA/000/392/515/GCA_000392515.3_ASM39251v3
Helicobacter pylori UM066	1321940	Proteobacteria	delta/epsilon subdivisions	38.6	Complete Genome	ftp://ftp.ncbi.nlm.nih.gov/genomes/all/GCA/000/392/535/GCA_000392535.3_ASM39253v3
Sorangium cellulosum So0157-2	1254432	Proteobacteria	delta/epsilon subdivisions	72.1	Complete Genome	ftp://ftp.ncbi.nlm.nih.gov/genomes/all/GCA/000/418/325/GCA_000418325.1_ASM41832v1
Campylobacter jejuni 32488	1338035	Proteobacteria	delta/epsilon subdivisions	30.5	Complete Genome	ftp://ftp.ncbi.nlm.nih.gov/genomes/all/GCA/000/430/385/GCA_000430385.1_ASM43038v1
Helicobacter pylori UM298	1321941	Proteobacteria	delta/epsilon subdivisions	38.8	Complete Genome	ftp://ftp.ncbi.nlm.nih.gov/genomes/all/GCA/000/439/295/GCA_000439295.2_ASM43929v2
Campylobacter coli CVM N29710	1273173	Proteobacteria	delta/epsilon subdivisions	31.4057	Complete Genome	ftp://ftp.ncbi.nlm.nih.gov/genomes/all/GCA/000/465/235/GCA_000465235.1_ASM46523v1
Campylobacter jejuni subsp. jejuni 00-2538	1380768	Proteobacteria	delta/epsilon subdivisions	30.5	Complete Genome	ftp://ftp.ncbi.nlm.nih.gov/genomes/all/GCA/000/466/065/GCA_000466065.2_ASM46606v2
Campylobacter jejuni subsp. jejuni 00-2544	1383068	Proteobacteria	delta/epsilon subdivisions	30.4708	Complete Genome	ftp://ftp.ncbi.nlm.nih.gov/genomes/all/GCA/000/466/075/GCA_000466075.2_ASM46607v2
Campylobacter jejuni subsp. jejuni 00-2426	1380767	Proteobacteria	delta/epsilon subdivisions	30.5	Complete Genome	ftp://ftp.ncbi.nlm.nih.gov/genomes/all/GCA/000/466/105/GCA_000466105.2_ASM46610v2
Campylobacter jejuni subsp. jejuni 00-2425	1357994	Proteobacteria	delta/epsilon subdivisions	30.5	Complete Genome	ftp://ftp.ncbi.nlm.nih.gov/genomes/all/GCA/000/468/915/GCA_000468915.2_ASM46891v2
Campylobacter jejuni 4031	1347340	Proteobacteria	delta/epsilon subdivisions	30.5	Complete Genome	ftp://ftp.ncbi.nlm.nih.gov/genomes/all/GCA/000/493/495/GCA_000493495.1_TS
Campylobacter coli 15-537360	1358410	Proteobacteria	delta/epsilon subdivisions	31.3688	Complete Genome	ftp://ftp.ncbi.nlm.nih.gov/genomes/all/GCA/000/494/775/GCA_000494775.1_ASM49477v1
Campylobacter fetus subsp. testudinum 03-427	1244528	Proteobacteria	delta/epsilon subdivisions	33.1	Complete Genome	ftp://ftp.ncbi.nlm.nih.gov/genomes/all/GCA/000/495/505/GCA_000495505.1_ASM49550v1
Helicobacter pylori BM012A	1407462	Proteobacteria	delta/epsilon subdivisions	38.9	Complete Genome	ftp://ftp.ncbi.nlm.nih.gov/genomes/all/GCA/000/498/315/GCA_000498315.1_ASM49831v1
Helicobacter pylori BM012S	1407463	Proteobacteria	delta/epsilon subdivisions	38.9	Complete Genome	ftp://ftp.ncbi.nlm.nih.gov/genomes/all/GCA/000/498/335/GCA_000498335.1_ASM49833v1
Campylobacter fetus subsp. venerealis cfvi03/293	1273266	Proteobacteria	delta/epsilon subdivisions	33.1124	Complete Genome	ftp://ftp.ncbi.nlm.nih.gov/genomes/all/GCA/000/512/745/GCA_000512745.2_ASM51274v2
Desulfurella acetivorans A63	694431	Proteobacteria	delta/epsilon subdivisions	32.1021	Complete Genome	ftp://ftp.ncbi.nlm.nih.gov/genomes/all/GCA/000/517/565/GCA_000517565.1_ASM51756v1
Sulfurospirillum multivorans DSM 12446	1150621	Proteobacteria	delta/epsilon subdivisions	40.9	Complete Genome	ftp://ftp.ncbi.nlm.nih.gov/genomes/all/GCA/000/568/815/GCA_000568815.1_ASM56881v1
Campylobacter coli RM1875	1183378	Proteobacteria	delta/epsilon subdivisions	31.0956	Complete Genome	ftp://ftp.ncbi.nlm.nih.gov/genomes/all/GCA/000/583/755/GCA_000583755.1_ASM58375v1
Campylobacter coli RM4661	1183379	Proteobacteria	delta/epsilon subdivisions	31.0718	Complete Genome	ftp://ftp.ncbi.nlm.nih.gov/genomes/all/GCA/000/583/775/GCA_000583775.1_ASM58377v1
Campylobacter coli RM5611	1183380	Proteobacteria	delta/epsilon subdivisions	31.3357	Complete Genome	ftp://ftp.ncbi.nlm.nih.gov/genomes/all/GCA/000/583/795/GCA_000583795.1_ASM58379v1
Helicobacter pylori SouthAfrica20	1352356	Proteobacteria	delta/epsilon subdivisions	38.6	Complete Genome	ftp://ftp.ncbi.nlm.nih.gov/genomes/all/GCA/000/590/775/GCA_000590775.1_ASM59077v1
Helicobacter pylori oki102	1382920	Proteobacteria	delta/epsilon subdivisions	38.8	Complete Genome	ftp://ftp.ncbi.nlm.nih.gov/genomes/all/GCA/000/600/045/GCA_000600045.1_ASM60004v1
Helicobacter pylori oki112	1382921	Proteobacteria	delta/epsilon subdivisions	38.8	Complete Genome	ftp://ftp.ncbi.nlm.nih.gov/genomes/all/GCA/000/600/085/GCA_000600085.1_ASM60008v1
Helicobacter pylori oki128	1382922	Proteobacteria	delta/epsilon subdivisions	39	Complete Genome	ftp://ftp.ncbi.nlm.nih.gov/genomes/all/GCA/000/600/125/GCA_000600125.1_ASM60012v1
Helicobacter pylori oki154	1382923	Proteobacteria	delta/epsilon subdivisions	38.8	Complete Genome	ftp://ftp.ncbi.nlm.nih.gov/genomes/all/GCA/000/600/145/GCA_000600145.1_ASM60014v1
Helicobacter pylori oki422	1382924	Proteobacteria	delta/epsilon subdivisions	38.8	Complete Genome	ftp://ftp.ncbi.nlm.nih.gov/genomes/all/GCA/000/600/165/GCA_000600165.1_ASM60016v1
Helicobacter pylori oki673	1382925	Proteobacteria	delta/epsilon subdivisions	38.8	Complete Genome	ftp://ftp.ncbi.nlm.nih.gov/genomes/all/GCA/000/600/185/GCA_000600185.1_ASM60018v1
Helicobacter pylori oki828	1382926	Proteobacteria	delta/epsilon subdivisions	38.8	Complete Genome	ftp://ftp.ncbi.nlm.nih.gov/genomes/all/GCA/000/600/205/GCA_000600205.1_ASM60020v1
Helicobacter pylori oki898	1382927	Proteobacteria	delta/epsilon subdivisions	38.8	Complete Genome	ftp://ftp.ncbi.nlm.nih.gov/genomes/all/GCA/000/600/225/GCA_000600225.1_ASM60022v1
Campylobacter jejuni subsp. jejuni R14	1295010	Proteobacteria	delta/epsilon subdivisions	30.4	Complete Genome	ftp://ftp.ncbi.nlm.nih.gov/genomes/all/GCA/000/632/435/GCA_000632435.1_ASM63243v1
Helicobacter pylori J166	102611	Proteobacteria	delta/epsilon subdivisions	38.9	Complete Genome	ftp://ftp.ncbi.nlm.nih.gov/genomes/all/GCA/000/685/625/GCA_000685625.1_ASM68562v1
Sandaracinus amylolyticus	927083	Proteobacteria	delta/epsilon subdivisions	72	Complete Genome	ftp://ftp.ncbi.nlm.nih.gov/genomes/all/GCA/000/737/325/GCA_000737325.2_ASM73732v2
Campylobacter fetus subsp. fetus 04/554	1240980	Proteobacteria	delta/epsilon subdivisions	33.1405	Complete Genome	ftp://ftp.ncbi.nlm.nih.gov/genomes/all/GCA/000/759/485/GCA_000759485.1_ASM75948v1
Campylobacter fetus subsp. venerealis 97/608	1093099	Proteobacteria	delta/epsilon subdivisions	33.1912	Complete Genome	ftp://ftp.ncbi.nlm.nih.gov/genomes/all/GCA/000/759/515/GCA_000759515.1_ASM75951v1
Campylobacter jejuni subsp. jejuni F38011	1408176	Proteobacteria	delta/epsilon subdivisions	30.5	Complete Genome	ftp://ftp.ncbi.nlm.nih.gov/genomes/all/GCA/000/772/225/GCA_000772225.1_ASM77222v1
Campylobacter fetus subsp. testudinum	1507806	Proteobacteria	delta/epsilon subdivisions	33.1	Complete Genome	ftp://ftp.ncbi.nlm.nih.gov/genomes/all/GCA/000/814/265/GCA_000814265.1_ASM81426v1
Campylobacter insulaenigrae NCTC 12927	1031564	Proteobacteria	delta/epsilon subdivisions	28.2	Complete Genome	ftp://ftp.ncbi.nlm.nih.gov/genomes/all/GCA/000/816/185/GCA_000816185.1_ASM81618v1
Campylobacter lari subsp. concheus LMG 11760	1031536	Proteobacteria	delta/epsilon subdivisions	29.7	Complete Genome	ftp://ftp.ncbi.nlm.nih.gov/genomes/all/GCA/000/816/225/GCA_000816225.1_ASM81622v1
Campylobacter sp. RM16704	1500960	Proteobacteria	delta/epsilon subdivisions	28.5	Complete Genome	ftp://ftp.ncbi.nlm.nih.gov/genomes/all/GCA/000/816/245/GCA_000816245.1_ASM81624v1
Campylobacter subantarcticus LMG 24374	1388751	Proteobacteria	delta/epsilon subdivisions	29.9	Complete Genome	ftp://ftp.ncbi.nlm.nih.gov/genomes/all/GCA/000/816/265/GCA_000816265.1_ASM81626v1
Campylobacter subantarcticus LMG 24377	1388752	Proteobacteria	delta/epsilon subdivisions	29.8	Complete Genome	ftp://ftp.ncbi.nlm.nih.gov/genomes/all/GCA/000/816/305/GCA_000816305.1_ASM81630v1
Campylobacter volucris LMG 24379	580033	Proteobacteria	delta/epsilon subdivisions	28.6	Complete Genome	ftp://ftp.ncbi.nlm.nih.gov/genomes/all/GCA/000/816/345/GCA_000816345.1_ASM81634v1
Campylobacter lari NCTC 11845	1388749	Proteobacteria	delta/epsilon subdivisions	29.4	Complete Genome	ftp://ftp.ncbi.nlm.nih.gov/genomes/all/GCA/000/816/365/GCA_000816365.1_ASM81636v1
Campylobacter lari CCUG 22395	1388750	Proteobacteria	delta/epsilon subdivisions	29.9	Complete Genome	ftp://ftp.ncbi.nlm.nih.gov/genomes/all/GCA/000/816/385/GCA_000816385.2_ASM81638v2
Campylobacter lari RM16701	1453989	Proteobacteria	delta/epsilon subdivisions	29.9	Complete Genome	ftp://ftp.ncbi.nlm.nih.gov/genomes/all/GCA/000/816/405/GCA_000816405.1_ASM81640v1
Campylobacter lari RM16712	1453988	Proteobacteria	delta/epsilon subdivisions	29.7	Complete Genome	ftp://ftp.ncbi.nlm.nih.gov/genomes/all/GCA/000/816/425/GCA_000816425.1_ASM81642v1
Campylobacter peloridis LMG 23910	1388753	Proteobacteria	delta/epsilon subdivisions	28.4457	Complete Genome	ftp://ftp.ncbi.nlm.nih.gov/genomes/all/GCA/000/816/785/GCA_000816785.1_ASM81678v1
Geobacter pickeringii	345632	Proteobacteria	delta/epsilon subdivisions	62.3	Complete Genome	ftp://ftp.ncbi.nlm.nih.gov/genomes/all/GCA/000/817/955/GCA_000817955.1_ASM81795v1
Helicobacter pylori 26695-1	1391726	Proteobacteria	delta/epsilon subdivisions	38.9	Complete Genome	ftp://ftp.ncbi.nlm.nih.gov/genomes/all/GCA/000/826/985/GCA_000826985.1_ASM82698v1
Geoalkalibacter subterraneus	483547	Proteobacteria	delta/epsilon subdivisions	56.6353	Complete Genome	ftp://ftp.ncbi.nlm.nih.gov/genomes/all/GCA/000/827/125/GCA_000827125.1_ASM82712v1
Helicobacter pylori NY40	1426844	Proteobacteria	delta/epsilon subdivisions	38.8	Complete Genome	ftp://ftp.ncbi.nlm.nih.gov/genomes/all/GCA/000/828/955/GCA_000828955.1_ASM82895v1
Campylobacter jejuni subsp. jejuni NCTC 11168-K12E5	1385720	Proteobacteria	delta/epsilon subdivisions	30.5	Complete Genome	ftp://ftp.ncbi.nlm.nih.gov/genomes/all/GCA/000/830/775/GCA_000830775.1_ASM83077v1
Campylobacter jejuni subsp. jejuni NCTC 11168-Kf1	1385723	Proteobacteria	delta/epsilon subdivisions	30.5	Complete Genome	ftp://ftp.ncbi.nlm.nih.gov/genomes/all/GCA/000/830/805/GCA_000830805.1_ASM83080v1
Campylobacter jejuni subsp. jejuni NCTC 11168-mcK12E5	1385721	Proteobacteria	delta/epsilon subdivisions	30.5	Complete Genome	ftp://ftp.ncbi.nlm.nih.gov/genomes/all/GCA/000/830/825/GCA_000830825.1_ASM83082v1
Campylobacter jejuni subsp. jejuni NCTC 11168-mfK12E5	1385722	Proteobacteria	delta/epsilon subdivisions	30.5	Complete Genome	ftp://ftp.ncbi.nlm.nih.gov/genomes/all/GCA/000/830/845/GCA_000830845.1_ASM83084v1
Campylobacter jejuni subsp. jejuni NCTC 11168-GSv	1385724	Proteobacteria	delta/epsilon subdivisions	30.5	Complete Genome	ftp://ftp.ncbi.nlm.nih.gov/genomes/all/GCA/000/830/865/GCA_000830865.1_ASM83086v1
Campylobacter fetus subsp. venerealis str. 84-112	688354	Proteobacteria	delta/epsilon subdivisions	33.2416	Complete Genome	ftp://ftp.ncbi.nlm.nih.gov/genomes/all/GCA/000/967/135/GCA_000967135.1_CFV
Helicobacter pylori J99	85963	Proteobacteria	delta/epsilon subdivisions	39	Complete Genome	ftp://ftp.ncbi.nlm.nih.gov/genomes/all/GCA/000/982/695/GCA_000982695.1_ASM98269v1
Sulfurovum lithotrophicum	206403	Proteobacteria	delta/epsilon subdivisions	44.3	Complete Genome	ftp://ftp.ncbi.nlm.nih.gov/genomes/all/GCA/000/987/835/GCA_000987835.1_ASM98783v1
Myxococcus fulvus 124B02	1334629	Proteobacteria	delta/epsilon subdivisions	70	Complete Genome	ftp://ftp.ncbi.nlm.nih.gov/genomes/all/GCA/000/988/565/GCA_000988565.1_ASM98856v1
Campylobacter lari	201	Proteobacteria	delta/epsilon subdivisions	29.8	Complete Genome	ftp://ftp.ncbi.nlm.nih.gov/genomes/all/GCA/001/017/575/GCA_001017575.1_ASM101757v1
Archangium gephyra	48	Proteobacteria	delta/epsilon subdivisions	69.4	Complete Genome	ftp://ftp.ncbi.nlm.nih.gov/genomes/all/GCA/001/027/285/GCA_001027285.1_ASM102728v1
Chondromyces crocatus	52	Proteobacteria	delta/epsilon subdivisions	68.7	Complete Genome	ftp://ftp.ncbi.nlm.nih.gov/genomes/all/GCA/001/189/295/GCA_001189295.1_ASM118929v1
Campylobacter gracilis	824	Proteobacteria	delta/epsilon subdivisions	46.6	Complete Genome	ftp://ftp.ncbi.nlm.nih.gov/genomes/all/GCA/001/190/745/GCA_001190745.1_ASM119074v1
Campylobacter ureolyticus RIGS 9880	1032069	Proteobacteria	delta/epsilon subdivisions	29.2	Complete Genome	ftp://ftp.ncbi.nlm.nih.gov/genomes/all/GCA/001/190/755/GCA_001190755.1_ASM119075v1
Vulgatibacter incomptus	1391653	Proteobacteria	delta/epsilon subdivisions	68.9	Complete Genome	ftp://ftp.ncbi.nlm.nih.gov/genomes/all/GCA/001/263/175/GCA_001263175.1_ASM126317v1
Labilithrix luteola	1391654	Proteobacteria	delta/epsilon subdivisions	66.1	Complete Genome	ftp://ftp.ncbi.nlm.nih.gov/genomes/all/GCA/001/263/205/GCA_001263205.1_ASM126320v1
Desulfuromonas soudanensis	1603606	Proteobacteria	delta/epsilon subdivisions	61.2	Complete Genome	ftp://ftp.ncbi.nlm.nih.gov/genomes/all/GCA/001/278/055/GCA_001278055.1_ASM127805v1
Campylobacter jejuni subsp. jejuni	32022	Proteobacteria	delta/epsilon subdivisions	30.6	Complete Genome	ftp://ftp.ncbi.nlm.nih.gov/genomes/all/GCA/001/299/595/GCA_001299595.1_ASM129959v1
Campylobacter coli	195	Proteobacteria	delta/epsilon subdivisions	31.4	Complete Genome	ftp://ftp.ncbi.nlm.nih.gov/genomes/all/GCA/001/305/715/GCA_001305715.1_ASM130571v1
Campylobacter jejuni	197	Proteobacteria	delta/epsilon subdivisions	30.5	Complete Genome	ftp://ftp.ncbi.nlm.nih.gov/genomes/all/GCA/001/314/285/GCA_001314285.1_ASM131428v1
Helicobacter typhlonius	76936	Proteobacteria	delta/epsilon subdivisions	38.9	Complete Genome	ftp://ftp.ncbi.nlm.nih.gov/genomes/all/GCA/001/460/635/GCA_001460635.1_htyphlonius_mit97-6810
Campylobacter fetus subsp. testudinum Sp3	1244529	Proteobacteria	delta/epsilon subdivisions	33.1	Complete Genome	ftp://ftp.ncbi.nlm.nih.gov/genomes/all/GCA/001/484/645/GCA_001484645.1_ASM148464v1
Desulfovibrio fairfieldensis	44742	Proteobacteria	delta/epsilon subdivisions	60.9	Complete Genome	ftp://ftp.ncbi.nlm.nih.gov/genomes/all/GCA/001/553/605/GCA_001553605.1_ASM155360v1
Desulfomicrobium orale DSM 12838	888061	Proteobacteria	delta/epsilon subdivisions	58.9	Complete Genome	ftp://ftp.ncbi.nlm.nih.gov/genomes/all/GCA/001/553/625/GCA_001553625.1_ASM155362v1
Pseudodesulfovibrio indicus	1716143	Proteobacteria	delta/epsilon subdivisions	63.5	Complete Genome	ftp://ftp.ncbi.nlm.nih.gov/genomes/all/GCA/001/563/225/GCA_001563225.1_ASM156322v1
Desulfuromonas sp. DDH964	1823759	Proteobacteria	delta/epsilon subdivisions	62.2	Complete Genome	ftp://ftp.ncbi.nlm.nih.gov/genomes/all/GCA/001/611/275/GCA_001611275.1_ASM161127v1
Geobacter anodireducens	1340425	Proteobacteria	delta/epsilon subdivisions	61.5106	Complete Genome	ftp://ftp.ncbi.nlm.nih.gov/genomes/all/GCA/001/628/815/GCA_001628815.1_ASM162881v1
Campylobacter hyointestinalis subsp. hyointestinalis LMG 9260	1031746	Proteobacteria	delta/epsilon subdivisions	34	Complete Genome	ftp://ftp.ncbi.nlm.nih.gov/genomes/all/GCA/001/643/955/GCA_001643955.1_ASM164395v1
Campylobacter hyointestinalis subsp. lawsonii CCUG 27631	1031752	Proteobacteria	delta/epsilon subdivisions	33.5	Complete Genome	ftp://ftp.ncbi.nlm.nih.gov/genomes/all/GCA/001/643/975/GCA_001643975.1_ASM164397v1
Campylobacter iguaniorum	1244531	Proteobacteria	delta/epsilon subdivisions	35.8	Complete Genome	ftp://ftp.ncbi.nlm.nih.gov/genomes/all/GCA/001/643/995/GCA_001643995.1_ASM164399v1
Campylobacter hepaticus	1813019	Proteobacteria	delta/epsilon subdivisions	28	Complete Genome	ftp://ftp.ncbi.nlm.nih.gov/genomes/all/GCA/001/687/475/GCA_001687475.2_ASM168747v2
Helicobacter sp. MIT 01-6242	222136	Proteobacteria	delta/epsilon subdivisions	40.8	Complete Genome	ftp://ftp.ncbi.nlm.nih.gov/genomes/all/GCA/001/693/335/GCA_001693335.1_ASM169333v1
Sulfurospirillum halorespirans DSM 13726	1193502	Proteobacteria	delta/epsilon subdivisions	41.3	Complete Genome	ftp://ftp.ncbi.nlm.nih.gov/genomes/all/GCA/001/723/605/GCA_001723605.1_ASM172360v1
Campylobacter jejuni subsp. jejuni str. RM3420	1340842	Proteobacteria	delta/epsilon subdivisions	30.6	Complete Genome	ftp://ftp.ncbi.nlm.nih.gov/genomes/all/GCA/001/767/215/GCA_001767215.1_ASM176721v1
Desulfococcus multivorans	897	Proteobacteria	delta/epsilon subdivisions	56.8	Complete Genome	ftp://ftp.ncbi.nlm.nih.gov/genomes/all/GCA/001/854/245/GCA_001854245.1_ASM185424v1
Campylobacter jejuni subsp. jejuni M129	1349827	Proteobacteria	delta/epsilon subdivisions	30.2691	Complete Genome	ftp://ftp.ncbi.nlm.nih.gov/genomes/all/GCA/001/865/595/GCA_001865595.1_ASM186559v1
Campylobacter jejuni subsp. jejuni D42a	1349826	Proteobacteria	delta/epsilon subdivisions	30.481	Complete Genome	ftp://ftp.ncbi.nlm.nih.gov/genomes/all/GCA/001/865/615/GCA_001865615.1_ASM186561v1
Pelobacter sp. SFB93	1842532	Proteobacteria	delta/epsilon subdivisions	53.4	Complete Genome	ftp://ftp.ncbi.nlm.nih.gov/genomes/all/GCA/001/887/775/GCA_001887775.1_ASM188777v1
Pelobacter acetylenicus	29542	Proteobacteria	delta/epsilon subdivisions	57.4	Complete Genome	ftp://ftp.ncbi.nlm.nih.gov/genomes/all/GCA/001/888/165/GCA_001888165.1_ASM188816v1
Minicystis rosea	888845	Proteobacteria	delta/epsilon subdivisions	69.1	Complete Genome	ftp://ftp.ncbi.nlm.nih.gov/genomes/all/GCA/001/931/535/GCA_001931535.1_ASM193153v1
Arcobacter sp. LPB0137	1850254	Proteobacteria	delta/epsilon subdivisions	27.7	Complete Genome	ftp://ftp.ncbi.nlm.nih.gov/genomes/all/GCA/001/956/695/GCA_001956695.1_ASM195669v1
Helicobacter pylori PMSS1	1431450	Proteobacteria	delta/epsilon subdivisions	38.9929	Complete Genome	ftp://ftp.ncbi.nlm.nih.gov/genomes/all/GCA/001/991/095/GCA_001991095.1_ASM199109v1
Helicobacter bilis	37372	Proteobacteria	delta/epsilon subdivisions	34.8	Complete Genome	ftp://ftp.ncbi.nlm.nih.gov/genomes/all/GCA/001/999/985/GCA_001999985.1_ASM199998v1
Helicobacter pylori SS1	102617	Proteobacteria	delta/epsilon subdivisions	38.9939	Complete Genome	ftp://ftp.ncbi.nlm.nih.gov/genomes/all/GCA/002/005/525/GCA_002005525.1_ASM200552v1
Campylobacter pinnipediorum subsp. pinnipediorum	1660067	Proteobacteria	delta/epsilon subdivisions	30.4	Complete Genome	ftp://ftp.ncbi.nlm.nih.gov/genomes/all/GCA/002/021/925/GCA_002021925.1_ASM202192v1
Campylobacter pinnipediorum subsp. caledonicus	1874362	Proteobacteria	delta/epsilon subdivisions	30.5	Complete Genome	ftp://ftp.ncbi.nlm.nih.gov/genomes/all/GCA/002/022/005/GCA_002022005.1_ASM202200v1
Campylobacter cuniculorum DSM 23162 = LMG 24588	1121267	Proteobacteria	delta/epsilon subdivisions	31.1968	Complete Genome	ftp://ftp.ncbi.nlm.nih.gov/genomes/all/GCA/002/104/335/GCA_002104335.1_ASM210433v1
Campylobacter sp. RM6137	1660073	Proteobacteria	delta/epsilon subdivisions	34.1981	Complete Genome	ftp://ftp.ncbi.nlm.nih.gov/genomes/all/GCA/002/139/855/GCA_002139855.1_ASM213985v1
Campylobacter sp. RM12175	1660076	Proteobacteria	delta/epsilon subdivisions	32.4338	Complete Genome	ftp://ftp.ncbi.nlm.nih.gov/genomes/all/GCA/002/139/875/GCA_002139875.1_ASM213987v1
Campylobacter sp. RM8964	1660074	Proteobacteria	delta/epsilon subdivisions	32.0516	Complete Genome	ftp://ftp.ncbi.nlm.nih.gov/genomes/all/GCA/002/139/895/GCA_002139895.1_ASM213989v1
Campylobacter sp. NCTC 13003	1660064	Proteobacteria	delta/epsilon subdivisions	33.6	Complete Genome	ftp://ftp.ncbi.nlm.nih.gov/genomes/all/GCA/002/139/915/GCA_002139915.1_ASM213991v1
Campylobacter lanienae NCTC 13004	1031753	Proteobacteria	delta/epsilon subdivisions	34.6	Complete Genome	ftp://ftp.ncbi.nlm.nih.gov/genomes/all/GCA/002/139/935/GCA_002139935.1_ASM213993v1
Sulfurospirillum sp. SL2-1	1986224	Proteobacteria	delta/epsilon subdivisions	38.7	Complete Genome	ftp://ftp.ncbi.nlm.nih.gov/genomes/all/GCA/002/162/315/GCA_002162315.1_ASM216231v1
Campylobacter sputorum bv. faecalis CCUG 20703	1031920	Proteobacteria	delta/epsilon subdivisions	29.7	Complete Genome	ftp://ftp.ncbi.nlm.nih.gov/genomes/all/GCA/002/220/735/GCA_002220735.1_ASM222073v1
Campylobacter sputorum bv. paraureolyticus LMG 11764	1032066	Proteobacteria	delta/epsilon subdivisions	29.6	Complete Genome	ftp://ftp.ncbi.nlm.nih.gov/genomes/all/GCA/002/220/755/GCA_002220755.1_ASM222075v1
Campylobacter sputorum	206	Proteobacteria	delta/epsilon subdivisions	29.3	Complete Genome	ftp://ftp.ncbi.nlm.nih.gov/genomes/all/GCA/002/220/775/GCA_002220775.1_ASM222077v1
Campylobacter sputorum bv. sputorum RM3237	1031754	Proteobacteria	delta/epsilon subdivisions	29.7	Complete Genome	ftp://ftp.ncbi.nlm.nih.gov/genomes/all/GCA/002/220/795/GCA_002220795.1_ASM222079v1
Campylobacter avium LMG 24591	522484	Proteobacteria	delta/epsilon subdivisions	34.2	Complete Genome	ftp://ftp.ncbi.nlm.nih.gov/genomes/all/GCA/002/238/335/GCA_002238335.1_ASM223833v1
Melittangium boletus DSM 14713	1294270	Proteobacteria	delta/epsilon subdivisions	68.4	Complete Genome	ftp://ftp.ncbi.nlm.nih.gov/genomes/all/GCA/002/305/855/GCA_002305855.1_ASM230585v1
Cystobacter fuscus	43	Proteobacteria	delta/epsilon subdivisions	68.5	Complete Genome	ftp://ftp.ncbi.nlm.nih.gov/genomes/all/GCA/002/305/875/GCA_002305875.1_ASM230587v1
Myxococcus macrosporus DSM 14697	1189310	Proteobacteria	delta/epsilon subdivisions	70.6	Complete Genome	ftp://ftp.ncbi.nlm.nih.gov/genomes/all/GCA/002/305/895/GCA_002305895.1_ASM230589v1
Sulfurospirillum sp. JPD-1	220622	Proteobacteria	delta/epsilon subdivisions	38.8	Complete Genome	ftp://ftp.ncbi.nlm.nih.gov/genomes/all/GCA/002/309/535/GCA_002309535.1_ASM230953v1
Desulfovibrio sp. G11	631220	Proteobacteria	delta/epsilon subdivisions	57.1	Complete Genome	ftp://ftp.ncbi.nlm.nih.gov/genomes/all/GCA/002/334/685/GCA_002334685.1_ASM233468v1
Candidatus Desulfovibrio trichonymphae	1725232	Proteobacteria	delta/epsilon subdivisions	54.8	Complete Genome	ftp://ftp.ncbi.nlm.nih.gov/genomes/all/GCA/002/355/955/GCA_002355955.1_ASM235595v1
Desulfobulbus oralis	1986146	Proteobacteria	delta/epsilon subdivisions	59.8	Complete Genome	ftp://ftp.ncbi.nlm.nih.gov/genomes/all/GCA/002/952/055/GCA_002952055.1_ASM295205v1
Campylobacter concisus	199	Proteobacteria	delta/epsilon subdivisions	39.2769	Complete Genome	ftp://ftp.ncbi.nlm.nih.gov/genomes/all/GCA/003/048/375/GCA_003048375.1_ASM304837v1
Helicobacter apodemus	135569	Proteobacteria	delta/epsilon subdivisions	33.1389	Complete Genome	ftp://ftp.ncbi.nlm.nih.gov/genomes/all/GCA/003/097/575/GCA_003097575.1_ASM309757v1
Bradymonas sediminis	1548548	Proteobacteria	delta/epsilon subdivisions	61.1	Complete Genome	ftp://ftp.ncbi.nlm.nih.gov/genomes/all/GCA/003/258/315/GCA_003258315.1_ASM325831v1
Arcobacter halophilus	197482	Proteobacteria	delta/epsilon subdivisions	27.6	Complete Genome	ftp://ftp.ncbi.nlm.nih.gov/genomes/all/GCA/003/346/755/GCA_003346755.1_ASM334675v1
Arcobacter mytili LMG 24559	1032238	Proteobacteria	delta/epsilon subdivisions	26.5046	Complete Genome	ftp://ftp.ncbi.nlm.nih.gov/genomes/all/GCA/003/346/775/GCA_003346775.1_ASM334677v1
Arcobacter bivalviorum	663364	Proteobacteria	delta/epsilon subdivisions	28.1	Complete Genome	ftp://ftp.ncbi.nlm.nih.gov/genomes/all/GCA/003/346/815/GCA_003346815.1_ASM334681v1
Arcobacter trophiarum LMG 25534	1032241	Proteobacteria	delta/epsilon subdivisions	28.2	Complete Genome	ftp://ftp.ncbi.nlm.nih.gov/genomes/all/GCA/003/355/515/GCA_003355515.1_ASM335551v1
Arcobacter suis CECT 7833	663365	Proteobacteria	delta/epsilon subdivisions	27.4	Complete Genome	ftp://ftp.ncbi.nlm.nih.gov/genomes/all/GCA/003/544/815/GCA_003544815.1_ASM354481v1
Arcobacter skirrowii CCUG 10374	1032239	Proteobacteria	delta/epsilon subdivisions	27.7	Complete Genome	ftp://ftp.ncbi.nlm.nih.gov/genomes/all/GCA/003/544/835/GCA_003544835.1_ASM354483v1
Arcobacter marinus	505249	Proteobacteria	delta/epsilon subdivisions	27.2	Complete Genome	ftp://ftp.ncbi.nlm.nih.gov/genomes/all/GCA/003/544/855/GCA_003544855.1_ASM354485v1
Arcobacter ellisii	913109	Proteobacteria	delta/epsilon subdivisions	26.9	Complete Genome	ftp://ftp.ncbi.nlm.nih.gov/genomes/all/GCA/003/544/915/GCA_003544915.1_ASM354491v1
Arcobacter molluscorum LMG 25693	870501	Proteobacteria	delta/epsilon subdivisions	26.2	Complete Genome	ftp://ftp.ncbi.nlm.nih.gov/genomes/all/GCA/003/544/935/GCA_003544935.1_ASM354493v1
Geobacter sulfurreducens	35554	Proteobacteria	delta/epsilon subdivisions	60.7	Complete Genome	ftp://ftp.ncbi.nlm.nih.gov/genomes/all/GCA/003/574/175/GCA_003574175.1_ASM357417v1
Helicobacter cinaedi	213	Proteobacteria	delta/epsilon subdivisions	38.2	Complete Genome	ftp://ftp.ncbi.nlm.nih.gov/genomes/all/GCA/003/574/195/GCA_003574195.1_ASM357419v1
Arcobacter cryaerophilus D2610	1032071	Proteobacteria	delta/epsilon subdivisions	27.5	Complete Genome	ftp://ftp.ncbi.nlm.nih.gov/genomes/all/GCA/003/660/085/GCA_003660085.1_ASM366008v1
Arcobacter cryaerophilus ATCC 43158	1032070	Proteobacteria	delta/epsilon subdivisions	27.3605	Complete Genome	ftp://ftp.ncbi.nlm.nih.gov/genomes/all/GCA/003/660/105/GCA_003660105.1_ASM366010v1
Arcobacter skirrowii	28200	Proteobacteria	delta/epsilon subdivisions	27.8	Complete Genome	ftp://ftp.ncbi.nlm.nih.gov/genomes/all/GCA/003/939/045/GCA_003939045.1_ASM393904v1
Hydrogenimonas sp.	2231112	Proteobacteria	delta/epsilon subdivisions	50.2	Complete Genome	ftp://ftp.ncbi.nlm.nih.gov/genomes/all/GCA/003/945/285/GCA_003945285.1_ASM394528v1
Desulfovibrio ferrophilus	241368	Proteobacteria	delta/epsilon subdivisions	56.0329	Complete Genome	ftp://ftp.ncbi.nlm.nih.gov/genomes/all/GCA/003/966/735/GCA_003966735.1_ASM396673v1
Nautilia sp. PV-1	2579250	Proteobacteria	delta/epsilon subdivisions	34.6	Complete Genome	ftp://ftp.ncbi.nlm.nih.gov/genomes/all/GCA/004/006/315/GCA_004006315.1_ASM400631v1
Corallococcus coralloides	184914	Proteobacteria	delta/epsilon subdivisions	70.3	Complete Genome	ftp://ftp.ncbi.nlm.nih.gov/genomes/all/GCA/004/104/415/GCA_004104415.1_ASM410441v1
Sorangium cellulosum	56	Proteobacteria	delta/epsilon subdivisions	72	Complete Genome	ftp://ftp.ncbi.nlm.nih.gov/genomes/all/GCA/004/135/755/GCA_004135755.1_ASM413575v1
Desulfovibrio carbinolicus	296842	Proteobacteria	delta/epsilon subdivisions	64.6392	Complete Genome	ftp://ftp.ncbi.nlm.nih.gov/genomes/all/GCA/004/135/975/GCA_004135975.1_ASM413597v1
Arcobacter thereius LMG 24486	1032240	Proteobacteria	delta/epsilon subdivisions	27	Complete Genome	ftp://ftp.ncbi.nlm.nih.gov/genomes/all/GCA/004/214/815/GCA_004214815.1_ASM421481v1
Campylobacter helveticus	28898	Proteobacteria	delta/epsilon subdivisions	34.2718	Complete Genome	ftp://ftp.ncbi.nlm.nih.gov/genomes/all/GCA/004/345/065/GCA_004345065.1_ASM434506v1
Desulfovibrio desulfuricans	876	Proteobacteria	delta/epsilon subdivisions	59.1	Complete Genome	ftp://ftp.ncbi.nlm.nih.gov/genomes/all/GCA/004/801/255/GCA_004801255.1_ASM480125v1
Cetia pacifica	1424653	Proteobacteria	delta/epsilon subdivisions	34.0733	Complete Genome	ftp://ftp.ncbi.nlm.nih.gov/genomes/all/GCA/005/083/985/GCA_005083985.2_ASM508398v2
Desulfoglaeba alkanexedens ALDC	980445	Proteobacteria	delta/epsilon subdivisions	59.3	Complete Genome	ftp://ftp.ncbi.nlm.nih.gov/genomes/all/GCA/005/377/625/GCA_005377625.1_ASM537762v1
Caminibacter mediatlanticus TB-2	391592	Proteobacteria	delta/epsilon subdivisions	26.9	Complete Genome	ftp://ftp.ncbi.nlm.nih.gov/genomes/all/GCA/005/843/985/GCA_005843985.1_ASM584398v1
Campylobacter hyointestinalis subsp. hyointestinalis	91352	Proteobacteria	delta/epsilon subdivisions	34.283	Complete Genome	ftp://ftp.ncbi.nlm.nih.gov/genomes/all/GCA/005/844/045/GCA_005844045.1_ASM584404v1
Myxococcus xanthus	34	Proteobacteria	delta/epsilon subdivisions	68.9	Complete Genome	ftp://ftp.ncbi.nlm.nih.gov/genomes/all/GCA/006/402/015/GCA_006402015.1_ASM640201v1
[truncated: 5,271 more rows]

## Sheet: Table S2
H-	D-	A	R	N	D	C	Q	E	G	H	I	L	K	M	F	P	S	T	W	Y	V
ANDN920101	alpha-CH chemical shifts (Andersen et al., 1992)	4.35	4.38	4.75	4.76	4.65	4.37	4.29	3.97	4.63	3.95	4.17	4.36	4.52	4.66	4.44	4.5	4.35	4.7	4.6	3.95
ARGP820101	Hydrophobicity index (Argos et al., 1982)	0.61	0.6	0.06	0.46	1.07	0	0.47	0.07	0.61	2.22	1.53	1.15	1.18	2.02	1.95	0.05	0.05	2.65	1.88	1.32
ARGP820102	Signal sequence helical potential (Argos et al., 1982)	1.18	0.2	0.23	0.05	1.89	0.72	0.11	0.49	0.31	1.45	3.23	0.06	2.67	1.96	0.76	0.97	0.84	0.77	0.39	1.08
ARGP820103	Membrane-buried preference parameters (Argos et al., 1982)	1.56	0.45	0.27	0.14	1.23	0.51	0.23	0.62	0.29	1.67	2.93	0.15	2.96	2.03	0.76	0.81	0.91	1.08	0.68	1.14
BEGF750101	Conformational parameter of inner helix (Beghin-Dirkx, 1975)	1	0.52	0.35	0.44	0.06	0.44	0.73	0.35	0.6	0.73	1	0.6	1	0.6	0.06	0.35	0.44	0.73	0.44	0.82
BEGF750102	Conformational parameter of beta-structure (Beghin-Dirkx, 1975)	0.77	0.72	0.55	0.65	0.65	0.72	0.55	0.65	0.83	0.98	0.83	0.55	0.98	0.98	0.55	0.55	0.83	0.77	0.83	0.98
BEGF750103	Conformational parameter of beta-turn (Beghin-Dirkx, 1975)	0.37	0.84	0.97	0.97	0.84	0.64	0.53	0.97	0.75	0.37	0.53	0.75	0.64	0.53	0.97	0.84	0.75	0.97	0.84	0.37
BHAR880101	Average flexibility indices (Bhaskaran-Ponnuswamy, 1988)	0.357	0.529	0.463	0.511	0.346	0.493	0.497	0.544	0.323	0.462	0.365	0.466	0.295	0.314	0.509	0.507	0.444	0.305	0.42	0.386
BIGC670101	Residue volume (Bigelow, 1967)	52.6	109.1	75.7	68.4	68.3	89.7	84.7	36.3	91.9	102	102	105.1	97.7	113.9	73.6	54.9	71.2	135.4	116.2	85.1
BIOV880101	Information value for accessibility; average fraction 35% (Biou et al., 1988)	16	-70	-74	-78	168	-73	-106	-13	50	151	145	-141	124	189	-20	-70	-38	145	53	123
BIOV880102	Information value for accessibility; average fraction 23% (Biou et al., 1988)	44	-68	-72	-91	90	-117	-139	-8	47	100	108	-188	121	148	-36	-60	-54	163	22	117
BROC820101	Retention coefficient in TFA (Browne et al., 1982)	7.3	-3.6	-5.7	-2.9	-9.2	-0.3	-7.1	-1.2	-2.1	6.6	20	-3.7	5.6	19.2	5.1	-4.1	0.8	16.3	5.9	3.5
BROC820102	Retention coefficient in HFBA (Browne et al., 1982)	3.9	3.2	-2.8	-2.8	-14.3	1.8	-7.5	-2.3	2	11	15	-2.5	4.1	14.7	5.6	-3.5	1.1	17.8	3.8	2.1
BULH740101	Transfer free energy to surface (Bull-Breese, 1974)	-0.2	-0.12	0.08	-0.2	-0.45	0.16	-0.3	0	-0.12	-2.26	-2.46	-0.35	-1.47	-2.33	-0.98	-0.39	-0.52	-2.01	-2.24	-1.56
BULH740102	Apparent partial specific volume (Bull-Breese, 1974)	0.691	0.728	0.596	0.558	0.624	0.649	0.632	0.592	0.646	0.809	0.842	0.767	0.709	0.756	0.73	0.594	0.655	0.743	0.743	0.777
BUNA790101	alpha-NH chemical shifts (Bundi-Wuthrich, 1979)	8.249	8.274	8.747	8.41	8.312	8.411	8.368	8.391	8.415	8.195	8.423	8.408	8.418	8.228	0	8.38	8.236	8.094	8.183	8.436
BUNA790102	alpha-CH chemical shifts (Bundi-Wuthrich, 1979)	4.349	4.396	4.755	4.765	4.686	4.373	4.295	3.972	4.63	4.224	4.385	4.358	4.513	4.663	4.471	4.498	4.346	4.702	4.604	4.184
BUNA790103	Spin-spin coupling constants 3JHalpha-NH (Bundi-Wuthrich, 1979)	6.5	6.9	7.5	7	7.7	6	7	5.6	8	7	6.5	6.5	0	9.4	0	6.5	6.9	0	6.8	7
BURA740101	Normalized frequency of alpha-helix (Burgess et al., 1974)	0.486	0.262	0.193	0.288	0.2	0.418	0.538	0.12	0.4	0.37	0.42	0.402	0.417	0.318	0.208	0.2	0.272	0.462	0.161	0.379
BURA740102	Normalized frequency of extended structure (Burgess et al., 1974)	0.288	0.362	0.229	0.271	0.533	0.327	0.262	0.312	0.2	0.411	0.4	0.265	0.375	0.318	0.34	0.354	0.388	0.231	0.429	0.495
CHAM810101	Steric parameter (Charton, 1981)	0.52	0.68	0.76	0.76	0.62	0.68	0.68	0	0.7	1.02	0.98	0.68	0.78	0.7	0.36	0.53	0.5	0.7	0.7	0.76
CHAM820101	Polarizability parameter (Charton-Charton, 1982)	0.046	0.291	0.134	0.105	0.128	0.18	0.151	0	0.23	0.186	0.186	0.219	0.221	0.29	0.131	0.062	0.108	0.409	0.298	0.14
CHAM820102	Free energy of solution in water, kcal/mole (Charton-Charton, 1982)	-0.368	-1.03	0	2.06	4.53	0.731	1.77	-0.525	0	0.791	1.07	0	0.656	1.06	-2.24	-0.524	0	1.6	4.91	0.401
CHAM830101	The Chou-Fasman parameter of the coil conformation (Charton-Charton, 1983)	0.71	1.06	1.37	1.21	1.19	0.87	0.84	1.52	1.07	0.66	0.69	0.99	0.59	0.71	1.61	1.34	1.08	0.76	1.07	0.63
CHAM830102	A parameter defined from the residuals obtained from the best correlation of	-0.118	0.124	0.289	0.048	0.083	-0.105	-0.245	0.104	0.138	0.23	-0.052	0.032	-0.258	0.015	0	0.225	0.166	0.158	0.094	0.513
CHAM830103	The number of atoms in the side chain labelled 1+1 (Charton-Charton, 1983)	0	1	1	1	1	1	1	0	1	2	1	1	1	1	0	1	2	1	1	2
CHAM830104	The number of atoms in the side chain labelled 2+1 (Charton-Charton, 1983)	0	1	1	1	0	1	1	0	1	1	2	1	1	1	0	0	0	1	1	0
CHAM830105	The number of atoms in the side chain labelled 3+1 (Charton-Charton, 1983)	0	1	0	0	0	1	1	0	1	0	0	1	1	1	0	0	0	1.5	1	0
CHAM830106	The number of bonds in the longest chain (Charton-Charton, 1983)	0	5	2	2	1	3	3	0	3	2	2	4	3	4	0	1	1	5	5	1
CHAM830107	A parameter of charge transfer capability (Charton-Charton, 1983)	0	0	1	1	0	0	1	1	0	0	0	0	0	0	0	0	0	0	0	0
CHAM830108	A parameter of charge transfer donor capability (Charton-Charton, 1983)	0	1	1	0	1	1	0	0	1	0	0	1	1	1	0	0	0	1	1	0
CHOC750101	Average volume of buried residue (Chothia, 1975)	91.5	202	135.2	124.5	117.7	161.1	155.1	66.4	167.3	168.8	167.9	171.3	170.8	203.4	129.3	99.1	122.1	237.6	203.6	141.7
CHOC760101	Residue accessible surface area in tripeptide (Chothia, 1976)	115	225	160	150	135	180	190	75	195	175	170	200	185	210	145	115	140	255	230	155
CHOC760102	Residue accessible surface area in folded protein (Chothia, 1976)	25	90	63	50	19	71	49	23	43	18	23	97	31	24	50	44	47	32	60	18
CHOC760103	Proportion of residues 95% buried (Chothia, 1976)	0.38	0.01	0.12	0.15	0.45	0.07	0.18	0.36	0.17	0.6	0.45	0.03	0.4	0.5	0.18	0.22	0.23	0.27	0.15	0.54
CHOC760104	Proportion of residues 100% buried (Chothia, 1976)	0.2	0	0.03	0.04	0.22	0.01	0.03	0.18	0.02	0.19	0.16	0	0.11	0.14	0.04	0.08	0.08	0.04	0.03	0.18
CHOP780101	Normalized frequency of beta-turn (Chou-Fasman, 1978a)	0.66	0.95	1.56	1.46	1.19	0.98	0.74	1.56	0.95	0.47	0.59	1.01	0.6	0.6	1.52	1.43	0.96	0.96	1.14	0.5
CHOP780201	Normalized frequency of alpha-helix (Chou-Fasman, 1978b)	1.42	0.98	0.67	1.01	0.7	1.11	1.51	0.57	1	1.08	1.21	1.16	1.45	1.13	0.57	0.77	0.83	1.08	0.69	1.06
CHOP780202	Normalized frequency of beta-sheet (Chou-Fasman, 1978b)	0.83	0.93	0.89	0.54	1.19	1.1	0.37	0.75	0.87	1.6	1.3	0.74	1.05	1.38	0.55	0.75	1.19	1.37	1.47	1.7
CHOP780203	Normalized frequency of beta-turn (Chou-Fasman, 1978b)	0.74	1.01	1.46	1.52	0.96	0.96	0.95	1.56	0.95	0.47	0.5	1.19	0.6	0.66	1.56	1.43	0.98	0.6	1.14	0.59
CHOP780204	Normalized frequency of N-terminal helix (Chou-Fasman, 1978b)	1.29	0.44	0.81	2.02	0.66	1.22	2.44	0.76	0.73	0.67	0.58	0.66	0.71	0.61	2.01	0.74	1.08	1.47	0.68	0.61
CHOP780205	Normalized frequency of C-terminal helix (Chou-Fasman, 1978b)	1.2	1.25	0.59	0.61	1.11	1.22	1.24	0.42	1.77	0.98	1.13	1.83	1.57	1.1	0	0.96	0.75	0.4	0.73	1.25
CHOP780206	Normalized frequency of N-terminal non helical region (Chou-Fasman, 1978b)	0.7	0.34	1.42	0.98	0.65	0.75	1.04	1.41	1.22	0.78	0.85	1.01	0.83	0.93	1.1	1.55	1.09	0.62	0.99	0.75
CHOP780207	Normalized frequency of C-terminal non helical region (Chou-Fasman, 1978b)	0.52	1.24	1.64	1.06	0.94	0.7	0.59	1.64	1.86	0.87	0.84	1.49	0.52	1.04	1.58	0.93	0.86	0.16	0.96	0.32
CHOP780208	Normalized frequency of N-terminal beta-sheet (Chou-Fasman, 1978b)	0.86	0.9	0.66	0.38	0.87	1.65	0.35	0.63	0.54	1.94	1.3	1	1.43	1.5	0.66	0.63	1.17	1.49	1.07	1.69
CHOP780209	Normalized frequency of C-terminal beta-sheet (Chou-Fasman, 1978b)	0.75	0.9	1.21	0.85	1.11	0.65	0.55	0.74	0.9	1.35	1.27	0.74	0.95	1.5	0.4	0.79	0.75	1.19	1.96	1.79
CHOP780210	Normalized frequency of N-terminal non beta region (Chou-Fasman, 1978b)	0.67	0.89	1.86	1.39	1.34	1.09	0.92	1.46	0.78	0.59	0.46	1.09	0.52	0.3	1.58	1.41	1.09	0.48	1.23	0.42
CHOP780211	Normalized frequency of C-terminal non beta region (Chou-Fasman, 1978b)	0.74	1.05	1.13	1.32	0.53	0.77	0.85	1.68	0.96	0.53	0.59	0.82	0.85	0.44	1.69	1.49	1.16	1.59	1.01	0.59
CHOP780212	Frequency of the 1st residue in turn (Chou-Fasman, 1978b)	0.06	0.07	0.161	0.147	0.149	0.074	0.056	0.102	0.14	0.043	0.061	0.055	0.068	0.059	0.102	0.12	0.086	0.077	0.082	0.062
CHOP780213	Frequency of the 2nd residue in turn (Chou-Fasman, 1978b)	0.076	0.106	0.083	0.11	0.053	0.098	0.06	0.085	0.047	0.034	0.025	0.115	0.082	0.041	0.301	0.139	0.108	0.013	0.065	0.048
CHOP780214	Frequency of the 3rd residue in turn (Chou-Fasman, 1978b)	0.035	0.099	0.191	0.179	0.117	0.037	0.077	0.19	0.093	0.013	0.036	0.072	0.014	0.065	0.034	0.125	0.065	0.064	0.114	0.028
CHOP780215	Frequency of the 4th residue in turn (Chou-Fasman, 1978b)	0.058	0.085	0.091	0.081	0.128	0.098	0.064	0.152	0.054	0.056	0.07	0.095	0.055	0.065	0.068	0.106	0.079	0.167	0.125	0.053
CHOP780216	Normalized frequency of the 2nd and 3rd residues in turn (Chou-Fasman, 1978b)	0.64	1.05	1.56	1.61	0.92	0.84	0.8	1.63	0.77	0.29	0.36	1.13	0.51	0.62	2.04	1.52	0.98	0.48	1.08	0.43
CIDH920101	Normalized hydrophobicity scales for alpha-proteins (Cid et al., 1992)	-0.45	-0.24	-0.2	-1.52	0.79	-0.99	-0.8	-1	1.07	0.76	1.29	-0.36	1.37	1.48	-0.12	-0.98	-0.7	1.38	1.49	1.26
CIDH920102	Normalized hydrophobicity scales for beta-proteins (Cid et al., 1992)	-0.08	-0.09	-0.7	-0.71	0.76	-0.4	-1.31	-0.84	0.43	1.39	1.24	-0.09	1.27	1.53	-0.01	-0.93	-0.59	2.25	1.53	1.09
CIDH920103	Normalized hydrophobicity scales for alpha+beta-proteins (Cid et al., 1992)	0.36	-0.52	-0.9	-1.09	0.7	-1.05	-0.83	-0.82	0.16	2.17	1.18	-0.56	1.21	1.01	-0.06	-0.6	-1.2	1.31	1.05	1.21
CIDH920104	Normalized hydrophobicity scales for alpha/beta-proteins (Cid et al., 1992)	0.17	-0.7	-0.9	-1.05	1.24	-1.2	-1.19	-0.57	-0.25	2.06	0.96	-0.62	0.6	1.29	-0.21	-0.83	-0.62	1.51	0.66	1.21
CIDH920105	Normalized average hydrophobicity scales (Cid et al., 1992)	0.02	-0.42	-0.77	-1.04	0.77	-1.1	-1.14	-0.8	0.26	1.81	1.14	-0.41	1	1.35	-0.09	-0.97	-0.77	1.71	1.11	1.13
COHE430101	Partial specific volume (Cohn-Edsall, 1943)	0.75	0.7	0.61	0.6	0.61	0.67	0.66	0.64	0.67	0.9	0.9	0.82	0.75	0.77	0.76	0.68	0.7	0.74	0.71	0.86
CRAJ730101	Normalized frequency of middle helix (Crawford et al., 1973)	1.33	0.79	0.72	0.97	0.93	1.42	1.66	0.58	1.49	0.99	1.29	1.03	1.4	1.15	0.49	0.83	0.94	1.33	0.49	0.96
CRAJ730102	Normalized frequency of beta-sheet (Crawford et al., 1973)	1	0.74	0.75	0.89	0.99	0.87	0.37	0.56	0.36	1.75	1.53	1.18	1.4	1.26	0.36	0.65	1.15	0.84	1.41	1.61
CRAJ730103	Normalized frequency of turn (Crawford et al., 1973)	0.6	0.79	1.42	1.24	1.29	0.92	0.64	1.38	0.95	0.67	0.7	1.1	0.67	1.05	1.47	1.26	1.05	1.23	1.35	0.48
DAWD720101	Size (Dawson, 1972)	2.5	7.5	5	2.5	3	6	5	0.5	6	5.5	5.5	7	6	6.5	5.5	3	5	7	7	5
DAYM780101	Amino acid composition (Dayhoff et al., 1978a)	8.6	4.9	4.3	5.5	2.9	3.9	6	8.4	2	4.5	7.4	6.6	1.7	3.6	5.2	7	6.1	1.3	3.4	6.6
DAYM780201	Relative mutability (Dayhoff et al., 1978b)	100	65	134	106	20	93	102	49	66	96	40	56	94	41	56	120	97	18	41	74
DESM900101	Membrane preference for cytochrome b: MPH89 (Degli Esposti et al., 1990)	1.56	0.59	0.51	0.23	1.8	0.39	0.19	1.03	1	1.27	1.38	0.15	1.93	1.42	0.27	0.96	1.11	0.91	1.1	1.58
DESM900102	Average membrane preference: AMP07 (Degli Esposti et al., 1990)	1.26	0.38	0.59	0.27	1.6	0.39	0.23	1.08	1	1.44	1.36	0.33	1.52	1.46	0.54	0.98	1.01	1.06	0.89	1.33
EISD840101	Consensus normalized hydrophobicity scale (Eisenberg, 1984)	0.25	-1.76	-0.64	-0.72	0.04	-0.69	-0.62	0.16	-0.4	0.73	0.53	-1.1	0.26	0.61	-0.07	-0.26	-0.18	0.37	0.02	0.54
EISD860101	Solvation free energy (Eisenberg-McLachlan, 1986)	0.67	-2.1	-0.6	-1.2	0.38	-0.22	-0.76	0	0.64	1.9	1.9	-0.57	2.4	2.3	1.2	0.01	0.52	2.6	1.6	1.5
EISD860102	Atom-based hydrophobic moment (Eisenberg-McLachlan, 1986)	0	10	1.3	1.9	0.17	1.9	3	0	0.99	1.2	1	5.7	1.9	1.1	0.18	0.73	1.5	1.6	1.8	0.48
EISD860103	Direction of hydrophobic moment (Eisenberg-McLachlan, 1986)	0	-0.96	-0.86	-0.98	0.76	-1	-0.89	0	-0.75	0.99	0.89	-0.99	0.94	0.92	0.22	-0.67	0.09	0.67	-0.93	0.84
FASG760101	Molecular weight (Fasman, 1976)	89.09	174.2	132.12	133.1	121.15	146.15	147.13	75.07	155.16	131.17	131.17	146.19	149.21	165.19	115.13	105.09	119.12	204.24	181.19	117.15
FASG760102	Melting point (Fasman, 1976)	297	238	236	270	178	185	249	290	277	284	337	224	283	284	222	228	253	282	344	293
FASG760103	Optical rotation (Fasman, 1976)	1.8	12.5	-5.6	5.05	-16.5	6.3	12	0	-38.5	12.4	-11	14.6	-10	-34.5	-86.2	-7.5	-28	-33.7	-10	5.63
FASG760104	pK-N (Fasman, 1976)	9.69	8.99	8.8	9.6	8.35	9.13	9.67	9.78	9.17	9.68	9.6	9.18	9.21	9.18	10.64	9.21	9.1	9.44	9.11	9.62
FASG760105	pK-C (Fasman, 1976)	2.34	1.82	2.02	1.88	1.92	2.17	2.1	2.35	1.82	2.36	2.36	2.16	2.28	2.16	1.95	2.19	2.09	2.43	2.2	2.32
FAUJ830101	Hydrophobic parameter pi (Fauchere-Pliska, 1983)	0.31	-1.01	-0.6	-0.77	1.54	-0.22	-0.64	0	0.13	1.8	1.7	-0.99	1.23	1.79	0.72	-0.04	0.26	2.25	0.96	1.22
FAUJ880101	Graph shape index (Fauchere et al., 1988)	1.28	2.34	1.6	1.6	1.77	1.56	1.56	0	2.99	4.19	2.59	1.89	2.35	2.94	2.67	1.31	3.03	3.21	2.94	3.67
FAUJ880102	Smoothed upsilon steric parameter (Fauchere et al., 1988)	0.53	0.69	0.58	0.59	0.66	0.71	0.72	0	0.64	0.96	0.92	0.78	0.77	0.71	0	0.55	0.63	0.84	0.71	0.89
FAUJ880103	Normalized van der Waals volume (Fauchere et al., 1988)	1	6.13	2.95	2.78	2.43	3.95	3.78	0	4.66	4	4	4.77	4.43	5.89	2.72	1.6	2.6	8.08	6.47	3
FAUJ880104	STERIMOL length of the side chain (Fauchere et al., 1988)	2.87	7.82	4.58	4.74	4.47	6.11	5.97	2.06	5.23	4.92	4.92	6.89	6.36	4.62	4.11	3.97	4.11	7.68	4.73	4.11
FAUJ880105	STERIMOL minimum width of the side chain (Fauchere et al., 1988)	1.52	1.52	1.52	1.52	1.52	1.52	1.52	1	1.52	1.9	1.52	1.52	1.52	1.52	1.52	1.52	1.73	1.52	1.52	1.9
FAUJ880106	STERIMOL maximum width of the side chain (Fauchere et al., 1988)	2.04	6.24	4.37	3.78	3.41	3.53	3.31	1	5.66	3.49	4.45	4.87	4.8	6.02	4.31	2.7	3.17	5.9	6.72	3.17
FAUJ880107	N.m.r. chemical shift of alpha-carbon (Fauchere et al., 1988)	7.3	11.1	8	9.2	14.4	10.6	11.4	0	10.2	16.1	10.1	10.9	10.4	13.9	17.8	13.1	16.7	13.2	13.9	17.2
FAUJ880108	Localized electrical effect (Fauchere et al., 1988)	-0.01	0.04	0.06	0.15	0.12	0.05	0.07	0	0.08	-0.01	-0.01	0	0.04	0.03	0	0.11	0.04	0	0.03	0.01
FAUJ880109	Number of hydrogen bond donors (Fauchere et al., 1988)	0	4	2	1	0	2	1	0	1	0	0	2	0	0	0	1	1	1	1	0
FAUJ880110	Number of full nonbonding orbitals (Fauchere et al., 1988)	0	3	3	4	0	3	4	0	1	0	0	1	0	0	0	2	2	0	2	0
FAUJ880111	Positive charge (Fauchere et al., 1988)	0	1	0	0	0	0	0	0	1	0	0	1	0	0	0	0	0	0	0	0
FAUJ880112	Negative charge (Fauchere et al., 1988)	0	0	0	1	0	0	1	0	0	0	0	0	0	0	0	0	0	0	0	0
FAUJ880113	pK-a(RCOOH) (Fauchere et al., 1988)	4.76	4.3	3.64	5.69	3.67	4.54	5.48	3.77	2.84	4.81	4.79	4.27	4.25	4.31	0	3.83	3.87	4.75	4.3	4.86
FINA770101	Helix-coil equilibrium constant (Finkelstein-Ptitsyn, 1977)	1.08	1.05	0.85	0.85	0.95	0.95	1.15	0.55	1	1.05	1.25	1.15	1.15	1.1	0.71	0.75	0.75	1.1	1.1	0.95
FINA910101	Helix initiation parameter at posision i-1 (Finkelstein et al., 1991)	1	0.7	1.7	3.2	1	1	1.7	1	1	0.6	1	0.7	1	1	1	1.7	1.7	1	1	0.6
FINA910102	Helix initiation parameter at posision i,i+1,i+2 (Finkelstein et al., 1991)	1	0.7	1	1.7	1	1	1.7	1.3	1	1	1	0.7	1	1	13	1	1	1	1	1
FINA910103	Helix termination parameter at posision j-2,j-1,j (Finkelstein et al., 1991)	1.2	1.7	1.2	0.7	1	1	0.7	0.8	1.2	0.8	1	1.7	1	1	1	1.5	1	1	1	0.8
FINA910104	Helix termination parameter at posision j+1 (Finkelstein et al., 1991)	1	1.7	1	0.7	1	1	0.7	1.5	1	1	1	1.7	1	1	0.1	1	1	1	1	1
GARJ730101	Partition coefficient (Garel et al., 1973)	0.28	0.1	0.25	0.21	0.28	0.35	0.33	0.17	0.21	0.82	1	0.09	0.74	2.18	0.39	0.12	0.21	5.7	1.26	0.6
GEIM800101	Alpha-helix indices (Geisow-Roberts, 1980)	1.29	1	0.81	1.1	0.79	1.07	1.49	0.63	1.33	1.05	1.31	1.33	1.54	1.13	0.63	0.78	0.77	1.18	0.71	0.81
GEIM800102	Alpha-helix indices for alpha-proteins (Geisow-Roberts, 1980)	1.13	1.09	1.06	0.94	1.32	0.93	1.2	0.83	1.09	1.05	1.13	1.08	1.23	1.01	0.82	1.01	1.17	1.32	0.88	1.13
GEIM800103	Alpha-helix indices for beta-proteins (Geisow-Roberts, 1980)	1.55	0.2	1.2	1.55	1.44	1.13	1.67	0.59	1.21	1.27	1.25	1.2	1.37	0.4	0.21	1.01	0.55	1.86	1.08	0.64
GEIM800104	Alpha-helix indices for alpha/beta-proteins (Geisow-Roberts, 1980)	1.19	1	0.94	1.07	0.95	1.32	1.64	0.6	1.03	1.12	1.18	1.27	1.49	1.02	0.68	0.81	0.85	1.18	0.77	0.74
GEIM800105	Beta-strand indices (Geisow-Roberts, 1980)	0.84	1.04	0.66	0.59	1.27	1.02	0.57	0.94	0.81	1.29	1.1	0.86	0.88	1.15	0.8	1.05	1.2	1.15	1.39	1.56
GEIM800106	Beta-strand indices for beta-proteins (Geisow-Roberts, 1980)	0.86	1.15	0.6	0.66	0.91	1.11	0.37	0.86	1.07	1.17	1.28	1.01	1.15	1.34	0.61	0.91	1.14	1.13	1.37	1.31
GEIM800107	Beta-strand indices for alpha/beta-proteins (Geisow-Roberts, 1980)	0.91	0.99	0.72	0.74	1.12	0.9	0.41	0.91	1.01	1.29	1.23	0.86	0.96	1.26	0.65	0.93	1.05	1.15	1.21	1.58
GEIM800108	Aperiodic indices (Geisow-Roberts, 1980)	0.91	1	1.64	1.4	0.93	0.94	0.97	1.51	0.9	0.65	0.59	0.82	0.58	0.72	1.66	1.23	1.04	0.67	0.92	0.6
GEIM800109	Aperiodic indices for alpha-proteins (Geisow-Roberts, 1980)	0.8	0.96	1.1	1.6	0	1.6	0.4	2	0.96	0.85	0.8	0.94	0.39	1.2	2.1	1.3	0.6	0	1.8	0.8
GEIM800110	Aperiodic indices for beta-proteins (Geisow-Roberts, 1980)	1.1	0.93	1.57	1.41	1.05	0.81	1.4	1.3	0.85	0.67	0.52	0.94	0.69	0.6	1.77	1.13	0.88	0.62	0.41	0.58
GEIM800111	Aperiodic indices for alpha/beta-proteins (Geisow-Roberts, 1980)	0.93	1.01	1.36	1.22	0.92	0.83	1.05	1.45	0.96	0.58	0.59	0.91	0.6	0.71	1.67	1.25	1.08	0.68	0.98	0.62
GOLD730101	Hydrophobicity factor (Goldsack-Chalifoux, 1973)	0.75	0.75	0.69	0	1	0.59	0	0	0	2.95	2.4	1.5	1.3	2.65	2.6	0	0.45	3	2.85	1.7
GOLD730102	Residue volume (Goldsack-Chalifoux, 1973)	88.3	181.2	125.1	110.8	112.4	148.7	140.5	60	152.6	168.5	168.5	175.6	162.2	189	122.2	88.7	118.2	227	193	141.4
GRAR740101	Composition (Grantham, 1974)	0	0.65	1.33	1.38	2.75	0.89	0.92	0.74	0.58	0	0	0.33	0	0	0.39	1.42	0.71	0.13	0.2	0
GRAR740102	Polarity (Grantham, 1974)	8.1	10.5	11.6	13	5.5	10.5	12.3	9	10.4	5.2	4.9	11.3	5.7	5.2	8	9.2	8.6	5.4	6.2	5.9
GRAR740103	Volume (Grantham, 1974)	31	124	56	54	55	85	83	3	96	111	111	119	105	132	32.5	32	61	170	136	84
GUYH850101	Partition energy (Guy, 1985)	0.1	1.91	0.48	0.78	-1.42	0.95	0.83	0.33	-0.5	-1.13	-1.18	1.4	-1.59	-2.12	0.73	0.52	0.07	-0.51	-0.21	-1.27
HOPA770101	Hydration number (Hopfinger, 1971), Cited by Charton-Charton (1982)	1	2.3	2.2	6.5	0.1	2.1	6.2	1.1	2.8	0.8	0.8	5.3	0.7	1.4	0.9	1.7	1.5	1.9	2.1	0.9
HOPT810101	Hydrophilicity value (Hopp-Woods, 1981)	-0.5	3	0.2	3	-1	0.2	3	0	-0.5	-1.8	-1.8	3	-1.3	-2.5	0	0.3	-0.4	-3.4	-2.3	-1.5
HUTJ700101	Heat capacity (Hutchens, 1970)	29.22	26.37	38.3	37.09	50.7	44.02	41.84	23.71	59.64	45	48.03	57.1	69.32	48.52	36.13	32.4	35.2	56.92	51.73	40.35
HUTJ700102	Absolute entropy (Hutchens, 1970)	30.88	68.43	41.7	40.66	53.83	46.62	44.98	24.74	65.99	49.71	50.62	63.21	55.32	51.06	39.21	35.65	36.5	60	51.15	42.75
HUTJ700103	Entropy of formation (Hutchens, 1970)	154.33	341.01	207.9	194.91	219.79	235.51	223.16	127.9	242.54	233.21	232.3	300.46	202.65	204.74	179.93	174.06	205.8	237.01	229.15	207.6
ISOY800101	Normalized relative frequency of alpha-helix (Isogai et al., 1980)	1.53	1.17	0.6	1	0.89	1.27	1.63	0.44	1.03	1.07	1.32	1.26	1.66	1.22	0.25	0.65	0.86	1.05	0.7	0.93
ISOY800102	Normalized relative frequency of extended structure (Isogai et al., 1980)	0.86	0.98	0.74	0.69	1.39	0.89	0.66	0.7	1.06	1.31	1.01	0.77	1.06	1.16	1.16	1.09	1.24	1.17	1.28	1.4
ISOY800103	Normalized relative frequency of bend (Isogai et al., 1980)	0.78	1.06	1.56	1.5	0.6	0.78	0.97	1.73	0.83	0.4	0.57	1.01	0.3	0.67	1.55	1.19	1.09	0.74	1.14	0.44
ISOY800104	Normalized relative frequency of bend R (Isogai et al., 1980)	1.09	0.97	1.14	0.77	0.5	0.83	0.92	1.25	0.67	0.66	0.44	1.25	0.45	0.5	2.96	1.21	1.33	0.62	0.94	0.56
ISOY800105	Normalized relative frequency of bend S (Isogai et al., 1980)	0.35	0.75	2.12	2.16	0.5	0.73	0.65	2.4	1.19	0.12	0.58	0.83	0.22	0.89	0.43	1.24	0.85	0.62	1.44	0.43
ISOY800106	Normalized relative frequency of helix end (Isogai et al., 1980)	1.09	1.07	0.88	1.24	1.04	1.09	1.14	0.27	1.07	0.97	1.3	1.2	0.55	0.8	1.78	1.2	0.99	1.03	0.69	0.77
ISOY800107	Normalized relative frequency of double bend (Isogai et al., 1980)	1.34	2.78	0.92	1.77	1.44	0.79	2.54	0.95	0	0.52	1.05	0.79	0	0.43	0.37	0.87	1.14	1.79	0.73	0
ISOY800108	Normalized relative frequency of coil (Isogai et al., 1980)	0.47	0.52	2.16	1.15	0.41	0.95	0.64	3.03	0.89	0.62	0.53	0.98	0.68	0.61	0.63	1.03	0.39	0.63	0.83	0.76
JANJ780101	Average accessible surface area (Janin et al., 1978)	27.8	94.7	60.1	60.6	15.5	68.7	68.2	24.5	50.7	22.8	27.6	103	33.5	25.5	51.5	42	45	34.7	55.2	23.7
JANJ780102	Percentage of buried residues (Janin et al., 1978)	51	5	22	19	74	16	16	52	34	66	60	3	52	58	25	35	30	49	24	64
JANJ780103	Percentage of exposed residues (Janin et al., 1978)	15	67	49	50	5	56	55	10	34	13	16	85	20	10	45	32	32	17	41	14
JANJ790101	Ratio of buried and accessible molar fractions (Janin, 1979)	1.7	0.1	0.4	0.4	4.6	0.3	0.3	1.8	0.8	3.1	2.4	0.05	1.9	2.2	0.6	0.8	0.7	1.6	0.5	2.9
JANJ790102	Transfer free energy (Janin, 1979)	0.3	-1.4	-0.5	-0.6	0.9	-0.7	-0.7	0.3	-0.1	0.7	0.5	-1.8	0.4	0.5	-0.3	-0.1	-0.2	0.3	-0.4	0.6
JOND750101	Hydrophobicity (Jones, 1975)	0.87	0.85	0.09	0.66	1.52	0	0.67	0.1	0.87	3.15	2.17	1.64	1.67	2.87	2.77	0.07	0.07	3.77	2.67	1.87
JOND750102	pK (-COOH) (Jones, 1975)	2.34	1.18	2.02	2.01	1.65	2.17	2.19	2.34	1.82	2.36	2.36	2.18	2.28	1.83	1.99	2.21	2.1	2.38	2.2	2.32
JOND920101	Relative frequency of occurrence (Jones et al., 1992)	0.077	0.051	0.043	0.052	0.02	0.041	0.062	0.074	0.023	0.053	0.091	0.059	0.024	0.04	0.051	0.069	0.059	0.014	0.032	0.066
JOND920102	Relative mutability (Jones et al., 1992)	100	83	104	86	44	84	77	50	91	103	54	72	93	51	58	117	107	25	50	98
JUKT750101	Amino acid distribution (Jukes et al., 1975)	5.3	2.6	3	3.6	1.3	2.4	3.3	4.8	1.4	3.1	4.7	4.1	1.1	2.3	2.5	4.5	3.7	0.8	2.3	4.2
JUNJ780101	Sequence frequency (Jungck, 1978)	685	382	397	400	241	313	427	707	155	394	581	575	132	303	366	593	490	99	292	553
KANM800101	Average relative probability of helix (Kanehisa-Tsong, 1980)	1.36	1	0.89	1.04	0.82	1.14	1.48	0.63	1.11	1.08	1.21	1.22	1.45	1.05	0.52	0.74	0.81	0.97	0.79	0.94
KANM800102	Average relative probability of beta-sheet (Kanehisa-Tsong, 1980)	0.81	0.85	0.62	0.71	1.17	0.98	0.53	0.88	0.92	1.48	1.24	0.77	1.05	1.2	0.61	0.92	1.18	1.18	1.23	1.66
KANM800103	Average relative probability of inner helix (Kanehisa-Tsong, 1980)	1.45	1.15	0.64	0.91	0.7	1.14	1.29	0.53	1.13	1.23	1.56	1.27	1.83	1.2	0.21	0.48	0.77	1.17	0.74	1.1
KANM800104	Average relative probability of inner beta-sheet (Kanehisa-Tsong, 1980)	0.75	0.79	0.33	0.31	1.46	0.75	0.46	0.83	0.83	1.87	1.56	0.66	0.86	1.37	0.52	0.82	1.36	0.79	1.08	2
KARP850101	Flexibility parameter for no rigid neighbors (Karplus-Schulz, 1985)	1.041	1.038	1.117	1.033	0.96	1.165	1.094	1.142	0.982	1.002	0.967	1.093	0.947	0.93	1.055	1.169	1.073	0.925	0.961	0.982
KARP850102	Flexibility parameter for one rigid neighbor (Karplus-Schulz, 1985)	0.946	1.028	1.006	1.089	0.878	1.025	1.036	1.042	0.952	0.892	0.961	1.082	0.862	0.912	1.085	1.048	1.051	0.917	0.93	0.927
KARP850103	Flexibility parameter for two rigid neighbors (Karplus-Schulz, 1985)	0.892	0.901	0.93	0.932	0.925	0.885	0.933	0.923	0.894	0.872	0.921	1.057	0.804	0.914	0.932	0.923	0.934	0.803	0.837	0.913
KHAG800101	The Kerr-constant increments (Khanarian-Moore, 1980)	49.1	133	-3.6	0	0	20	0	64.6	75.7	18.9	15.6	0	6.8	54.7	43.8	44.4	31	70.5	0	29.5
KLEP840101	Net charge (Klein et al., 1984)	0	1	0	-1	0	0	-1	0	0	0	0	1	0	0	0	0	0	0	0	0
KRIW710101	Side chain interaction parameter (Krigbaum-Rubin, 1971)	4.6	6.5	5.9	5.7	-1	6.1	5.6	7.6	4.5	2.6	3.25	7.9	1.4	3.2	7	5.25	4.8	4	4.35	3.4
KRIW790101	Side chain interaction parameter (Krigbaum-Komoriya, 1979)	4.32	6.55	6.24	6.04	1.73	6.13	6.17	6.09	5.66	2.31	3.93	7.92	2.44	2.59	7.19	5.37	5.16	2.78	3.58	3.31
KRIW790102	Fraction of site occupied by water (Krigbaum-Komoriya, 1979)	0.28	0.34	0.31	0.33	0.11	0.39	0.37	0.28	0.23	0.12	0.16	0.59	0.08	0.1	0.46	0.27	0.26	0.15	0.25	0.22
KRIW790103	Side chain volume (Krigbaum-Komoriya, 1979)	27.5	105	58.7	40	44.6	80.7	62	0	79	93.5	93.5	100	94.1	115.5	41.9	29.3	51.3	145.5	117.3	71.5
KYTJ820101	Hydropathy index (Kyte-Doolittle, 1982)	1.8	-4.5	-3.5	-3.5	2.5	-3.5	-3.5	-0.4	-3.2	4.5	3.8	-3.9	1.9	2.8	-1.6	-0.8	-0.7	-0.9	-1.3	4.2
LAWE840101	Transfer free energy, CHP/water (Lawson et al., 1984)	-0.48	-0.06	-0.87	-0.75	-0.32	-0.32	-0.71	0	-0.51	0.81	1.02	-0.09	0.81	1.03	2.03	0.05	-0.35	0.66	1.24	0.56
LEVM760101	Hydrophobic parameter (Levitt, 1976)	-0.5	3	0.2	2.5	-1	0.2	2.5	0	-0.5	-1.8	-1.8	3	-1.3	-2.5	-1.4	0.3	-0.4	-3.4	-2.3	-1.5
LEVM760102	Distance between C-alpha and centroid of side chain (Levitt, 1976)	0.77	3.72	1.98	1.99	1.38	2.58	2.63	0	2.76	1.83	2.08	2.94	2.34	2.97	1.42	1.28	1.43	3.58	3.36	1.49
LEVM760103	Side chain angle theta(AAR) (Levitt, 1976)	121.9	121.4	117.5	121.2	113.7	118	118.2	0	118.2	118.9	118.1	122	113.1	118.2	81.9	117.9	117.1	118.4	110	121.7
LEVM760104	Side chain torsion angle phi(AAAR) (Levitt, 1976)	243.2	206.6	207.1	215	209.4	205.4	213.6	300	219.9	217.9	205.6	210.9	204	203.7	237.4	232	226.7	203.7	195.6	220.3
LEVM760105	Radius of gyration of side chain (Levitt, 1976)	0.77	2.38	1.45	1.43	1.22	1.75	1.77	0.58	1.78	1.56	1.54	2.08	1.8	1.9	1.25	1.08	1.24	2.21	2.13	1.29
LEVM760106	van der Waals parameter R0 (Levitt, 1976)	5.2	6	5	5	6.1	6	6	4.2	6	7	7	6	6.8	7.1	6.2	4.9	5	7.6	7.1	6.4
LEVM760107	van der Waals parameter epsilon (Levitt, 1976)	0.025	0.2	0.1	0.1	0.1	0.1	0.1	0.025	0.1	0.19	0.19	0.2	0.19	0.39	0.17	0.025	0.1	0.56	0.39	0.15
LEVM780101	Normalized frequency of alpha-helix, with weights (Levitt, 1978)	1.29	0.96	0.9	1.04	1.11	1.27	1.44	0.56	1.22	0.97	1.3	1.23	1.47	1.07	0.52	0.82	0.82	0.99	0.72	0.91
LEVM780102	Normalized frequency of beta-sheet, with weights (Levitt, 1978)	0.9	0.99	0.76	0.72	0.74	0.8	0.75	0.92	1.08	1.45	1.02	0.77	0.97	1.32	0.64	0.95	1.21	1.14	1.25	1.49
LEVM780103	Normalized frequency of reverse turn, with weights (Levitt, 1978)	0.77	0.88	1.28	1.41	0.81	0.98	0.99	1.64	0.68	0.51	0.58	0.96	0.41	0.59	1.91	1.32	1.04	0.76	1.05	0.47
LEVM780104	Normalized frequency of alpha-helix, unweighted (Levitt, 1978)	1.32	0.98	0.95	1.03	0.92	1.1	1.44	0.61	1.31	0.93	1.31	1.25	1.39	1.02	0.58	0.76	0.79	0.97	0.73	0.93
LEVM780105	Normalized frequency of beta-sheet, unweighted (Levitt, 1978)	0.86	0.97	0.73	0.69	1.04	1	0.66	0.89	0.85	1.47	1.04	0.77	0.93	1.21	0.68	1.02	1.27	1.26	1.31	1.43
LEVM780106	Normalized frequency of reverse turn, unweighted (Levitt, 1978)	0.79	0.9	1.25	1.47	0.79	0.92	1.02	1.67	0.81	0.5	0.57	0.99	0.51	0.77	1.78	1.3	0.97	0.79	0.93	0.46
LEWP710101	Frequency of occurrence in beta-bends (Lewis et al., 1971)	0.22	0.28	0.42	0.73	0.2	0.26	0.08	0.58	0.14	0.22	0.19	0.27	0.38	0.08	0.46	0.55	0.49	0.43	0.46	0.08
LIFS790101	Conformational preference for all beta-strands (Lifson-Sander, 1979)	0.92	0.93	0.6	0.48	1.16	0.95	0.61	0.61	0.93	1.81	1.3	0.7	1.19	1.25	0.4	0.82	1.12	1.54	1.53	1.81
LIFS790102	Conformational preference for parallel beta-strands (Lifson-Sander, 1979)	1	0.68	0.54	0.5	0.91	0.28	0.59	0.79	0.38	2.6	1.42	0.59	1.49	1.3	0.35	0.7	0.59	0.89	1.08	2.63
LIFS790103	Conformational preference for antiparallel beta-strands (Lifson-Sander, 1979)	0.9	1.02	0.62	0.47	1.24	1.18	0.62	0.56	1.12	1.54	1.26	0.74	1.09	1.23	0.42	0.87	1.3	1.75	1.68	1.53
MANP780101	Average surrounding hydrophobicity (Manavalan-Ponnuswamy, 1978)	12.97	11.72	11.42	10.85	14.63	11.76	11.89	12.43	12.16	15.67	14.9	11.36	14.39	14	11.37	11.23	11.69	13.93	13.42	15.71
MAXF760101	Normalized frequency of alpha-helix (Maxfield-Scheraga, 1976)	1.43	1.18	0.64	0.92	0.94	1.22	1.67	0.46	0.98	1.04	1.36	1.27	1.53	1.19	0.49	0.7	0.78	1.01	0.69	0.98
MAXF760102	Normalized frequency of extended structure (Maxfield-Scheraga, 1976)	0.86	0.94	0.74	0.72	1.17	0.89	0.62	0.97	1.06	1.24	0.98	0.79	1.08	1.16	1.22	1.04	1.18	1.07	1.25	1.33
MAXF760103	Normalized frequency of zeta R (Maxfield-Scheraga, 1976)	0.64	0.62	3.14	1.92	0.32	0.8	1.01	0.63	2.05	0.92	0.37	0.89	1.07	0.86	0.5	1.01	0.92	1	1.31	0.87
MAXF760104	Normalized frequency of left-handed alpha-helix (Maxfield-Scheraga, 1976)	0.17	0.76	2.62	1.08	0.95	0.91	0.28	5.02	0.57	0.26	0.21	1.17	0	0.28	0.12	0.57	0.23	0	0.97	0.24
MAXF760105	Normalized frequency of zeta L (Maxfield-Scheraga, 1976)	1.13	0.48	1.11	1.18	0.38	0.41	1.02	3.84	0.3	0.4	0.65	1.13	0	0.45	0	0.81	0.71	0.93	0.38	0.48
MAXF760106	Normalized frequency of alpha region (Maxfield-Scheraga, 1976)	1	1.18	0.87	1.39	1.09	1.13	1.04	0.46	0.71	0.68	1.01	1.05	0.36	0.65	1.95	1.56	1.23	1.1	0.87	0.58
MCMT640101	Refractivity (McMeekin et al., 1964), Cited by Jones (1975)	4.34	26.66	13.28	12	35.77	17.56	17.26	0	21.81	19.06	18.78	21.29	21.64	29.4	10.93	6.35	11.01	42.53	31.53	13.92
MEEJ800101	Retention coefficient in HPLC, pH7.4 (Meek, 1980)	0.5	0.8	0.8	-8.2	-6.8	-4.8	-16.9	0	-3.5	13.9	8.8	0.1	4.8	13.2	6.1	1.2	2.7	14.9	6.1	2.7
MEEJ800102	Retention coefficient in HPLC, pH2.1 (Meek, 1980)	-0.1	-4.5	-1.6	-2.8	-2.2	-2.5	-7.5	-0.5	0.8	11.8	10	-3.2	7.1	13.9	8	-3.7	1.5	18.1	8.2	3.3
MEEJ810101	Retention coefficient in NaClO4 (Meek-Rossetti, 1981)	1.1	-0.4	-4.2	-1.6	7.1	-2.9	0.7	-0.2	-0.7	8.5	11	-1.9	5.4	13.4	4.4	-3.2	-1.7	17.1	7.4	5.9
MEEJ810102	Retention coefficient in NaH2PO4 (Meek-Rossetti, 1981)	1	-2	-3	-0.5	4.6	-2	1.1	0.2	-2.2	7	9.6	-3	4	12.6	3.1	-2.9	-0.6	15.1	6.7	4.6
MEIH800101	Average reduced distance for C-alpha (Meirovitch et al., 1980)	0.93	0.98	0.98	1.01	0.88	1.02	1.02	1.01	0.89	0.79	0.85	1.05	0.84	0.78	1	1.02	0.99	0.83	0.93	0.81
MEIH800102	Average reduced distance for side chain (Meirovitch et al., 1980)	0.94	1.09	1.04	1.08	0.84	1.11	1.12	1.01	0.92	0.76	0.82	1.23	0.83	0.73	1.04	1.04	1.02	0.87	1.03	0.81
MEIH800103	Average side chain orientation angle (Meirovitch et al., 1980)	87	81	70	71	104	66	72	90	90	105	104	65	100	108	78	83	83	94	83	94
MIYS850101	Effective partition energy (Miyazawa-Jernigan, 1985)	2.36	1.92	1.7	1.67	3.36	1.75	1.74	2.06	2.41	4.17	3.93	1.23	4.22	4.37	1.89	1.81	2.04	3.82	2.91	3.49
NAGK730101	Normalized frequency of alpha-helix (Nagano, 1973)	1.29	0.83	0.77	1	0.94	1.1	1.54	0.72	1.29	0.94	1.23	1.23	1.23	1.23	0.7	0.78	0.87	1.06	0.63	0.97
NAGK730102	Normalized frequency of bata-structure (Nagano, 1973)	0.96	0.67	0.72	0.9	1.13	1.18	0.33	0.9	0.87	1.54	1.26	0.81	1.29	1.37	0.75	0.77	1.23	1.13	1.07	1.41
NAGK730103	Normalized frequency of coil (Nagano, 1973)	0.72	1.33	1.38	1.04	1.01	0.81	0.75	1.35	0.76	0.8	0.63	0.84	0.62	0.58	1.43	1.34	1.03	0.87	1.35	0.83
NAKH900101	AA composition of total proteins (Nakashima et al., 1990)	7.99	5.86	4.33	5.14	1.81	3.98	6.1	6.91	2.17	5.48	9.16	6.01	2.5	3.83	4.95	6.84	5.77	1.34	3.15	6.65
NAKH900102	SD of AA composition of total proteins (Nakashima et al., 1990)	3.73	3.34	2.33	2.23	2.3	2.36	3	3.36	1.55	2.52	3.4	3.36	1.37	1.94	3.18	2.83	2.63	1.15	1.76	2.53
NAKH900103	AA composition of mt-proteins (Nakashima et al., 1990)	5.74	1.92	5.25	2.11	1.03	2.3	2.63	5.66	2.3	9.12	15.36	3.2	5.3	6.51	4.79	7.55	7.51	2.51	4.08	5.12
NAKH900104	Normalized composition of mt-proteins (Nakashima et al., 1990)	-0.6	-1.18	0.39	-1.36	-0.34	-0.71	-1.16	-0.37	0.08	1.44	1.82	-0.84	2.04	1.38	-0.05	0.25	0.66	1.02	0.53	-0.6
NAKH900105	AA composition of mt-proteins from animal (Nakashima et al., 1990)	5.88	1.54	4.38	1.7	1.11	2.3	2.6	5.29	2.33	8.78	16.52	2.58	6	6.58	5.29	7.68	8.38	2.89	3.51	4.66
NAKH900106	Normalized composition from animal (Nakashima et al., 1990)	-0.57	-1.29	0.02	-1.54	-0.3	-0.71	-1.17	-0.48	0.1	1.31	2.16	-1.02	2.55	1.42	0.11	0.3	0.99	1.35	0.2	-0.79
NAKH900107	AA composition of mt-proteins from fungi and plant (Nakashima et al., 1990)	5.39	2.81	7.31	3.07	0.86	2.31	2.7	6.52	2.23	9.94	12.64	4.67	3.68	6.34	3.62	7.24	5.44	1.64	5.42	6.18
NAKH900108	Normalized composition from fungi and plant (Nakashima et al., 1990)	-0.7	-0.91	1.28	-0.93	-0.41	-0.71	-1.13	-0.12	0.04	1.77	1.02	-0.4	0.86	1.29	-0.42	0.14	-0.13	0.26	1.29	-0.19
NAKH900109	AA composition of membrane proteins (Nakashima et al., 1990)	9.25	3.96	3.71	3.89	1.07	3.17	4.8	8.51	1.88	6.47	10.94	3.5	3.14	6.36	4.36	6.26	5.66	2.22	3.28	7.55
NAKH900110	Normalized composition of membrane proteins (Nakashima et al., 1990)	0.34	-0.57	-0.27	-0.56	-0.32	-0.34	-0.43	0.48	-0.19	0.39	0.52	-0.75	0.47	1.3	-0.19	-0.2	-0.04	0.77	0.07	0.36
NAKH900111	Transmembrane regions of non-mt-proteins (Nakashima et al., 1990)	10.17	1.21	1.36	1.18	1.48	1.57	1.15	8.87	1.07	10.91	16.22	1.04	4.12	9.6	2.24	5.38	5.61	2.67	2.68	11.44
NAKH900112	Transmembrane regions of mt-proteins (Nakashima et al., 1990)	6.61	0.41	1.84	0.59	0.83	1.2	1.63	4.88	1.14	12.91	21.66	1.15	7.17	7.76	3.51	6.84	8.89	2.11	2.57	6.3
NAKH900113	Ratio of average and computed composition (Nakashima et al., 1990)	1.61	0.4	0.73	0.75	0.37	0.61	1.5	3.12	0.46	1.61	1.37	0.62	1.59	1.24	0.67	0.68	0.92	1.63	0.67	1.3
NAKH920101	AA composition of CYT of single-spanning proteins (Nakashima-Nishikawa, 1992)	8.63	6.75	4.18	6.24	1.03	4.76	7.82	6.8	2.7	3.48	8.44	6.25	2.14	2.73	6.28	8.53	4.43	0.8	2.54	5.44
NAKH920102	AA composition of CYT2 of single-spanning proteins (Nakashima-Nishikawa,	10.88	6.01	5.75	6.13	0.69	4.68	9.34	7.72	2.15	1.8	8.03	6.11	3.79	2.93	7.21	7.25	3.51	0.47	1.01	4.57
NAKH920103	AA composition of EXT of single-spanning proteins (Nakashima-Nishikawa, 1992)	5.15	4.38	4.81	5.75	3.24	4.45	7.05	6.38	2.69	4.4	8.11	5.25	1.6	3.52	5.65	8.04	7.41	1.68	3.42	7
NAKH920104	AA composition of EXT2 of single-spanning proteins (Nakashima-Nishikawa,	5.04	3.73	5.94	5.26	2.2	4.5	6.07	7.09	2.99	4.32	9.88	6.31	1.85	3.72	6.22	8.05	5.2	2.1	3.32	6.19
NAKH920105	AA composition of MEM of single-spanning proteins (Nakashima-Nishikawa, 1992)	9.9	0.09	0.94	0.35	2.55	0.87	0.08	8.14	0.2	15.25	22.28	0.16	1.85	6.47	2.38	4.17	4.33	2.21	3.42	14.34
NAKH920106	AA composition of CYT of multi-spanning proteins (Nakashima-Nishikawa, 1992)	6.69	6.65	4.49	4.97	1.7	5.39	7.76	6.32	2.11	4.51	8.23	8.36	2.46	3.59	5.2	7.4	5.18	1.06	2.75	5.27
NAKH920107	AA composition of EXT of multi-spanning proteins (Nakashima-Nishikawa, 1992)	5.08	4.75	5.75	5.96	2.95	4.24	6.04	8.2	2.1	4.95	8.03	4.93	2.61	4.36	4.84	6.41	5.87	2.31	4.55	6.07
NAKH920108	AA composition of MEM of multi-spanning proteins (Nakashima-Nishikawa, 1992)	9.36	0.27	2.31	0.94	2.56	1.14	0.94	6.17	0.47	13.73	16.64	0.58	3.93	10.99	1.96	5.58	4.68	2.2	3.13	12.43
NISK800101	8 A contact number (Nishikawa-Ooi, 1980)	0.23	-0.26	-0.94	-1.13	1.78	-0.57	-0.75	-0.07	0.11	1.19	1.03	-1.05	0.66	0.48	-0.76	-0.67	-0.36	0.9	0.59	1.24
NISK860101	14 A contact number (Nishikawa-Ooi, 1986)	-0.22	-0.93	-2.65	-4.12	4.66	-2.76	-3.64	-1.62	1.28	5.58	5.01	-4.18	3.51	5.27	-3.03	-2.84	-1.2	5.2	2.15	4.45
NOZY710101	Transfer energy, organic solvent/water (Nozaki-Tanford, 1971)	0.5	0	0	0	0	0	0	0	0.5	1.8	1.8	0	1.3	2.5	0	0	0.4	3.4	2.3	1.5
OOBM770101	Average non-bonded energy per atom (Oobatake-Ooi, 1977)	-1.895	-1.475	-1.56	-1.518	-2.035	-1.521	-1.535	-1.898	-1.755	-1.951	-1.966	-1.374	-1.963	-1.864	-1.699	-1.753	-1.767	-1.869	-1.686	-1.981
OOBM770102	Short and medium range non-bonded energy per atom (Oobatake-Ooi, 1977)	-1.404	-0.921	-1.178	-1.162	-1.365	-1.116	-1.163	-1.364	-1.215	-1.189	-1.315	-1.074	-1.303	-1.135	-1.236	-1.297	-1.252	-1.03	-1.03	-1.254
OOBM770103	Long range non-bonded energy per atom (Oobatake-Ooi, 1977)	-0.491	-0.554	-0.382	-0.356	-0.67	-0.405	-0.371	-0.534	-0.54	-0.762	-0.65	-0.3	-0.659	-0.729	-0.463	-0.455	-0.515	-0.839	-0.656	-0.728
OOBM770104	Average non-bonded energy per residue (Oobatake-Ooi, 1977)	-9.475	-16.225	-12.48	-12.144	-12.21	-13.689	-13.815	-7.592	-17.55	-15.608	-15.728	-12.366	-15.704	-20.504	-11.893	-10.518	-12.369	-26.166	-20.232	-13.867
OOBM770105	Short and medium range non-bonded energy per residue (Oobatake-Ooi, 1977)	-7.02	-10.131	-9.424	-9.296	-8.19	-10.044	-10.467	-5.456	-12.15	-9.512	-10.52	-9.666	-10.424	-12.485	-8.652	-7.782	-8.764	-14.42	-12.36	-8.778
OOBM850101	Optimized beta-structure-coil equilibrium constant (Oobatake et al., 1985)	2.01	0.84	0.03	-2.05	1.98	1.02	0.93	0.12	-0.14	3.7	2.73	2.55	1.75	2.68	0.41	1.47	2.39	2.49	2.23	3.5
OOBM850102	Optimized propensity to form reverse turn (Oobatake et al., 1985)	1.34	0.95	2.49	3.32	1.07	1.49	2.2	2.07	1.27	0.66	0.54	0.61	0.7	0.8	2.12	0.94	1.09	-4.65	-0.17	1.32
OOBM850103	Optimized transfer energy parameter (Oobatake et al., 1985)	0.46	-1.54	1.31	-0.33	0.2	-1.12	0.48	0.64	-1.31	3.28	0.43	-1.71	0.15	0.52	-0.58	-0.83	-1.52	1.25	-2.21	0.54
OOBM850104	Optimized average non-bonded energy per atom (Oobatake et al., 1985)	-2.49	2.55	2.27	8.86	-3.13	1.79	4.04	-0.56	4.22	-10.87	-7.16	-9.97	-4.96	-6.64	5.19	-1.6	-4.75	-17.84	9.25	-3.97
OOBM850105	Optimized side chain interaction parameter (Oobatake et al., 1985)	4.55	5.97	5.56	2.85	-0.78	4.15	5.16	9.14	4.48	2.1	3.24	10.68	2.18	4.37	5.14	6.78	8.6	1.97	2.4	3.81
PALJ810101	Normalized frequency of alpha-helix from LG (Palau et al., 1981)	1.3	0.93	0.9	1.02	0.92	1.04	1.43	0.63	1.33	0.87	1.3	1.23	1.32	1.09	0.63	0.78	0.8	1.03	0.71	0.95
PALJ810102	Normalized frequency of alpha-helix from CF (Palau et al., 1981)	1.32	1.04	0.74	0.97	0.7	1.25	1.48	0.59	1.06	1.01	1.22	1.13	1.47	1.1	0.57	0.77	0.86	1.02	0.72	1.05
PALJ810103	Normalized frequency of beta-sheet from LG (Palau et al., 1981)	0.81	1.03	0.81	0.71	1.12	1.03	0.59	0.94	0.85	1.47	1.03	0.77	0.96	1.13	0.75	1.02	1.19	1.24	1.35	1.44
PALJ810104	Normalized frequency of beta-sheet from CF (Palau et al., 1981)	0.9	0.75	0.82	0.75	1.12	0.95	0.44	0.83	0.86	1.59	1.24	0.75	0.94	1.41	0.46	0.7	1.2	1.28	1.45	1.73
PALJ810105	Normalized frequency of turn from LG (Palau et al., 1981)	0.84	0.91	1.48	1.28	0.69	1	0.78	1.76	0.53	0.55	0.49	0.95	0.52	0.88	1.47	1.29	1.05	0.88	1.28	0.51
PALJ810106	Normalized frequency of turn from CF (Palau et al., 1981)	0.65	0.93	1.45	1.47	1.43	0.94	0.75	1.53	0.96	0.57	0.56	0.95	0.71	0.72	1.51	1.46	0.96	0.9	1.12	0.55
PALJ810107	Normalized frequency of alpha-helix in all-alpha class (Palau et al., 1981)	1.08	0.93	1.05	0.86	1.22	0.95	1.09	0.85	1.02	0.98	1.04	1.01	1.11	0.96	0.91	0.95	1.15	1.17	0.8	1.03
PALJ810108	Normalized frequency of alpha-helix in alpha+beta class (Palau et al., 1981)	1.34	0.91	0.83	1.06	1.27	1.13	1.69	0.47	1.11	0.84	1.39	1.08	0.9	1.02	0.48	1.05	0.74	0.64	0.73	1.18
PALJ810109	Normalized frequency of alpha-helix in alpha/beta class (Palau et al., 1981)	1.15	1.06	0.87	1	1.03	1.43	1.37	0.64	0.95	0.99	1.22	1.2	1.45	0.92	0.72	0.84	0.97	1.11	0.72	0.82
PALJ810110	Normalized frequency of beta-sheet in all-beta class (Palau et al., 1981)	0.89	1.06	0.67	0.71	1.04	1.06	0.72	0.87	1.04	1.14	1.02	1	1.41	1.32	0.69	0.86	1.15	1.06	1.35	1.66
PALJ810111	Normalized frequency of beta-sheet in alpha+beta class (Palau et al., 1981)	0.82	0.99	1.27	0.98	0.71	1.01	0.54	0.94	1.26	1.67	0.94	0.73	1.3	1.56	0.69	0.65	0.98	1.25	1.26	1.22
PALJ810112	Normalized frequency of beta-sheet in alpha/beta class (Palau et al., 1981)	0.98	1.03	0.66	0.74	1.01	0.63	0.59	0.9	1.17	1.38	1.05	0.83	0.82	1.23	0.73	0.98	1.2	1.26	1.23	1.62
PALJ810113	Normalized frequency of turn in all-alpha class (Palau et al., 1981)	0.69	0	1.52	2.42	0	1.44	0.63	2.64	0.22	0.43	0	1.18	0.88	2.2	1.34	1.43	0.28	0	1.53	0.14
PALJ810114	Normalized frequency of turn in all-beta class (Palau et al., 1981)	0.87	1.3	1.36	1.24	0.83	1.06	0.91	1.69	0.91	0.27	0.67	0.66	0	0.47	1.54	1.08	1.12	1.24	0.54	0.69
PALJ810115	Normalized frequency of turn in alpha+beta class (Palau et al., 1981)	0.91	0.77	1.32	0.9	0.5	1.06	0.53	1.61	1.08	0.36	0.77	1.27	0.76	0.37	1.62	1.34	0.87	1.1	1.24	0.52
PALJ810116	Normalized frequency of turn in alpha/beta class (Palau et al., 1981)	0.92	0.9	1.57	1.22	0.62	0.66	0.92	1.61	0.39	0.79	0.5	0.86	0.5	0.96	1.3	1.4	1.11	0.57	1.78	0.5
PARJ860101	HPLC parameter (Parker et al., 1986)	2.1	4.2	7	10	1.4	6	7.8	5.7	2.1	-8	-9.2	5.7	-4.2	-9.2	2.1	6.5	5.2	-10	-1.9	-3.7
PLIV810101	Partition coefficient (Pliska et al., 1981)	-2.89	-3.3	-3.41	-3.38	-2.49	-3.15	-2.94	-3.25	-2.84	-1.72	-1.61	-3.31	-1.84	-1.63	-2.5	-3.3	-2.91	-1.75	-2.42	-2.08
PONP800101	Surrounding hydrophobicity in folded form (Ponnuswamy et al., 1980)	12.28	11.49	11	10.97	14.93	11.28	11.19	12.01	12.84	14.77	14.1	10.8	14.33	13.43	11.19	11.26	11.65	12.95	13.29	15.07
PONP800102	Average gain in surrounding hydrophobicity (Ponnuswamy et al., 1980)	7.62	6.81	6.17	6.18	10.93	6.67	6.38	7.31	7.85	9.99	9.37	5.72	9.83	8.99	6.64	6.93	7.08	8.41	8.53	10.38
PONP800103	Average gain ratio in surrounding hydrophobicity (Ponnuswamy et al., 1980)	2.63	2.45	2.27	2.29	3.36	2.45	2.31	2.55	2.57	3.08	2.98	2.12	3.18	3.02	2.46	2.6	2.55	2.85	2.79	3.21
PONP800104	Surrounding hydrophobicity in alpha-helix (Ponnuswamy et al., 1980)	13.65	11.28	12.24	10.98	14.49	11.3	12.55	15.36	11.59	14.63	14.01	11.96	13.4	14.08	11.51	11.26	13	12.06	12.64	12.88
PONP800105	Surrounding hydrophobicity in beta-sheet (Ponnuswamy et al., 1980)	14.6	13.24	11.79	13.78	15.9	12.02	13.59	14.18	15.35	14.1	16.49	13.28	16.23	14.18	14.1	13.36	14.5	13.9	14.76	16.3
PONP800106	Surrounding hydrophobicity in turn (Ponnuswamy et al., 1980)	10.67	11.05	10.85	10.21	14.15	11.71	11.71	10.95	12.07	12.95	13.07	9.93	15	13.27	10.62	11.18	10.53	11.41	11.52	13.86
PONP800107	Accessibility reduction ratio (Ponnuswamy et al., 1980)	3.7	2.53	2.12	2.6	3.03	2.7	3.3	3.13	3.57	7.69	5.88	1.79	5.21	6.6	2.12	2.43	2.6	6.25	3.03	7.14
PONP800108	Average number of surrounding residues (Ponnuswamy et al., 1980)	6.05	5.7	5.04	4.95	7.86	5.45	5.1	6.16	5.8	7.51	7.37	4.88	6.39	6.62	5.65	5.53	5.81	6.98	6.73	7.62
PRAM820101	Intercept in regression analysis (Prabhakaran-Ponnuswamy, 1982)	0.305	0.227	0.322	0.335	0.339	0.306	0.282	0.352	0.215	0.278	0.262	0.391	0.28	0.195	0.346	0.326	0.251	0.291	0.293	0.291
PRAM820102	Slope in regression analysis x 1.0E1 (Prabhakaran-Ponnuswamy, 1982)	0.175	0.083	0.09	0.14	0.074	0.093	0.135	0.201	0.125	0.1	0.104	0.058	0.054	0.104	0.136	0.155	0.152	0.092	0.081	0.096
PRAM820103	Correlation coefficient in regression analysis (Prabhakaran-Ponnuswamy, 1982)	0.687	0.59	0.489	0.632	0.263	0.527	0.669	0.67	0.594	0.564	0.541	0.407	0.328	0.577	0.6	0.692	0.713	0.632	0.495	0.529
PRAM900101	Hydrophobicity (Prabhakaran, 1990)	-6.7	51.5	20.1	38.5	-8.4	17.2	34.3	-4.2	12.6	-13	-11.7	36.8	-14.2	-15.5	0.8	-2.5	-5	-7.9	2.9	-10.9
[truncated: 314 more rows]

## Sheet: Table S3
Organism/Name	Domain	GC%	AAA	AAT	AAC	AAG	ATA	ATT	ATC	ATG	ACA	ACT	ACC	ACG	AGA	AGT	AGC	AGG	TAT	TAC	TTA	TTT	TTC	TTG	TCA	TCT	TCC	TCG	TGT	TGC	TGG	CAA	CAT	CAC	CAG	CTA	CTT	CTC	CTG	CCA	CCT	CCC	CCG	CGA	CGT	CGC	CGG	GAA	GAT
[truncated: 7,270 more rows]
[truncated: 14 more columns]

[truncated: 4 more sheets: Table S4, Table S5, Table S6, Table S7]
